# Supplementary material
Source: PubMed Central journal article supplement (PMC2692836)

## A Versatile Cyclodehydration Reaction for the Synthesis of Isoquinoline and $\beta$ -Carboline Derivatives.

Mohammad Movassaghi\* and Matthew D. Hill

*Massachusetts Institute of Technology, Department of Chemistry, Massachusetts 02139*

### Contents:

|                                                                                                      |            |
|------------------------------------------------------------------------------------------------------|------------|
| <u>General Procedures</u>                                                                            | <u>S1</u>  |
| <u>Materials</u>                                                                                     | <u>S1</u>  |
| <u>Instrumentation</u>                                                                               | <u>S2</u>  |
| <u>Synthesis of 3,4-Dihydroisoquinoline Derivatives, Figure 1</u>                                    | <u>S3</u>  |
| <u>Synthesis of Isoquinoline Derivatives, Figure 1</u>                                               | <u>S13</u> |
| <u>Synthesis of 3,4-Dihydro-<math>\beta</math>-carboline Derivatives, Figure 1</u>                   | <u>S20</u> |
| <u>Equation 1</u>                                                                                    | <u>S27</u> |
| <u>Equation 2</u>                                                                                    | <u>S28</u> |
| <u>Equation 3</u>                                                                                    | <u>S29</u> |
| <u>Oxidation of 3,4-Dihydro-<math>\beta</math>-carbolines and 3,4-Dihydroisoquinolines, Figure 2</u> | <u>S30</u> |
| <u>Copy of <math>^1\text{H}</math> and <math>^{13}\text{C}</math> NMR spectra</u>                    | <u>S34</u> |

### Supporting Information

**General Procedures.** All reactions were performed in oven-dried or flame-dried round bottomed flasks, modified Schlenk (Kjeldahl shape) flasks, or glass pressure vessels. The flasks were fitted with rubber septa and reactions were conducted under a positive pressure of argon. Stainless steel syringes or cannulae were used to transfer air- and moisture-sensitive liquids. Flash column chromatography was performed as described by Still et al. using silica gel (60- $\text{\AA}$  pore size, 32–63  $\mu\text{m}$ , standard grade, Sorbent Technologies) or non-activated alumina gel (80–325 mesh, chromatographic grade, EM Science).<sup>1</sup> Analytical thin-layer chromatography was performed using glass plates pre-coated with 0.25 mm 230–400 mesh silica gel or neutral alumina gel impregnated with a fluorescent indicator (254 nm). Thin layer chromatography plates were visualized by exposure to ultraviolet light and/or by exposure to an ethanolic phosphomolybdic acid (PMA), an acidic solution of *p*-anisaldehyde (anis), an aqueous solution of ceric ammonium molybdate (CAM), an aqueous solution of potassium permanganate ( $\text{KMnO}_4$ ) or an ethanolic solution of ninhydrin followed by heating (<1 min) on a hot plate (~250  $^\circ\text{C}$ ). Organic solutions were concentrated on Büchi R-200 rotary evaporators at ~10 Torr (house vacuum) at 25–35  $^\circ\text{C}$ , then at ~0.5 Torr (vacuum pump) unless otherwise indicated.

**Materials.** Commercial reagents and solvents were used as received with the following exceptions: Dichloromethane, diethyl ether, tetrahydrofuran, acetonitrile, and toluene were purchased from J.T.

<sup>1</sup> Still, W. C.; Kahn, M.; Mitra, A. *J. Org. Chem.* **1978**, *43*, 2923–2925.

Baker (Cycletainer<sup>TM</sup>) and were purified by the method of Grubbs et al. under positive argon pressure.<sup>2</sup> 2-chloropyridine was distilled from calcium hydride and stored sealed under an argon atmosphere. The starting amides were prepared by acylation of the corresponding phenethylamine or tryptamine derivatives<sup>3</sup> or via previously reported copper-catalyzed C–N bond-forming reactions.<sup>4,5</sup>

**Instrumentation.** All reaction conducted at 140 °C were performed in a CEM Discover Lab Mate microwave reactor. Proton nuclear magnetic resonance (<sup>1</sup>H NMR) spectra were recorded with a Varian inverse probe 500 INOVA spectrometer. Chemical shifts are recorded in parts per million on the  $\delta$  scale and are referenced from the residual protium in the NMR solvent (CHCl<sub>3</sub>:  $\delta$  7.27, C<sub>6</sub>H<sub>5</sub>D<sub>5</sub>:  $\delta$  7.16). Data is reported as follows: chemical shift [multiplicity (s = singlet, d = doublet, q = quartet, m = multiplet), integration, coupling constant(s) in Hertz, assignment]. Carbon-13 nuclear magnetic resonance spectra were recorded with a Varian 500 INOVA spectrometer and are recorded in parts per million on the  $\delta$  scale and are referenced from the carbon resonances of the solvent (CDCl<sub>3</sub>:  $\delta$  77.2, benzene-*d*<sub>6</sub>:  $\delta$  128.0, DMSO:  $\delta$  39.5). Fluorine-19 nuclear magnetic resonance spectra were recorded with a Varian 300 INOVA spectrometer and are recorded in parts per million on the  $\delta$  scale and are referenced from the fluorine resonances of trifluoroacetic acid (CDCl<sub>3</sub>:  $\delta$  -76.6). Data is reported as follows: chemical shift [multiplicity (s = singlet, d = doublet, q = quartet, m = multiplet), coupling constant(s) in Hertz, assignment]. Infrared data were obtained with a Perkin-Elmer 2000 FTIR and are reported as follows: [frequency of absorption (cm<sup>-1</sup>), intensity of absorption (s = strong, m = medium, w = weak, br = broad), assignment]. Chiral HPLC analysis was performed on an Agilent 1100 Series HPLC with a Chiralpak OD-H column. We thank Dr. Li Li at the Massachusetts Institute of Technology Department of Chemistry instrumentation facility for obtaining mass spectrometric data.

---

<sup>2</sup> Pangborn, A. B.; Giardello, M. A.; Grubbs, R. H.; Rosen, R. K.; Timmers, F. J. *Organometallics* **1996**, *15*, 1518–1520.

<sup>3</sup> For a general procedure, see: DeRuiter, J.; Swearingen, B. E.; Wandrekar, V.; Mayfield, C. A. *J. Med. Chem.* **1989**, *32*, 1033–1038.

<sup>4</sup> For the general procedure used for the synthesis of all *N*-vinyl amides, see: Jiang, L.; Job, G. E.; Klapars, A.; Buchwald, S. L. *Org. Lett.* **2003**, *5*, 3667–3669.

<sup>5</sup> For related reports, see: (a) Wolfe, J. P.; Wagaw, S.; Marcoux, J.-F.; Buchwald, S. L. *Acc. Chem. Res.* **1998**, *31*, 805–818. (b) Hartwig, J. F. *Acc. Chem. Res.* **1998**, *31*, 852–860. (c) Muci, A. R.; Buchwald, S. L. *Top. Curr. Chem.* **2002**, *219*, 131–209. (d) Beletskaya, I. P.; Cheprakov, A. V. *Coordin. Chem. Rev.* **2004**, *248*, 2337–2364. (e) Dehli, J. R.; Legros, J.; Bolm, C. *Chem. Commun.* **2005**, 973–986.

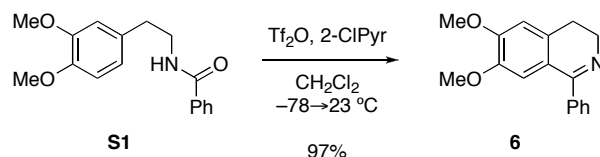

**6,7-Dimethoxy-1-phenyl-3,4-dihydroisoquinoline (6, Figure 1):**

Trifluoromethanesulfonic anhydride (64  $\mu$ L, 0.39 mmol, 1.1 equiv) was added via syringe over 1 min to a stirred mixture of amide **S1** (100 mg, 0.350 mmol, 1 equiv) and 2-chloropyridine (36  $\mu$ L, 0.39 mmol, 1.1 equiv) in dichloromethane (1.8 mL) at  $-78$   $^{\circ}$ C. After 5 min, the reaction mixture was placed in an ice-water bath and warmed to  $0$   $^{\circ}$ C. After 5 min, the resulting solution was allowed to warm to  $23$   $^{\circ}$ C. After 1 h, aqueous sodium hydroxide solution (0.5 mL, 1N) was introduced to neutralize the trifluoromethanesulfonate salts. Dichloromethane (5 mL) was added to dilute the mixture and the layers were separated. The organic layer was washed with brine (2 mL), was dried over anhydrous sodium sulfate, and was filtered. The volatiles were removed under reduced pressure, and the residue was purified by flash column chromatography (eluent: 30% EtOAc in hexanes;  $\text{Al}_2\text{O}_3$ :  $15 \times 1.5$  cm) on alumina gel to give the 3,4-dihydroisoquinoline derivative **6**<sup>6</sup> as a pale yellow solid (90 mg, 97%).

$^1\text{H}$  NMR (500 MHz,  $\text{CDCl}_3$ ,  $20$   $^{\circ}$ C)  $\delta$ : 7.62–7.59 (m, 2H, ArH), 7.46–7.41 (m, 3H, ArH), 6.80 (s, 1H, ArH), 6.79 (s, 1H, ArH), 3.96 (s, 3H,  $\text{OCH}_3$ ), 3.84–3.80 (m, 2H,  $\text{CH}_2\text{CH}_2\text{N}$ ), 3.74 (s, 3H,  $\text{OCH}_3$ ), 2.77–2.72 (m, 2H,  $\text{CH}_2\text{CH}_2\text{N}$ ).

$^{13}\text{C}$  NMR (125 MHz,  $\text{CDCl}_3$ ,  $20$   $^{\circ}$ C)  $\delta$ : 166.8, 151.0, 147.2, 139.4, 132.7, 129.4, 128.9, 128.3, 121.7, 111.6, 110.4, 56.3, 56.2, 47.9, 26.2.

FTIR (neat)  $\text{cm}^{-1}$ : 3058 (w), 2999 (w), 2936 (m), 2833 (m), 1605 (m), 1562 (m), 1513 (s), 1464 (m), 1355 (s), 1277 (s), 1116 (s).

HRMS (ESI): calc'd for  $\text{C}_{17}\text{H}_{18}\text{NO}_2$   $[\text{M}+\text{H}]^+$ : 268.1332, found: 268.1334.

TLC (10% EtOAc in hexanes),  $R_f$ : 0.31 (UV).

<sup>6</sup> For a prior report on the synthesis of **6**, see Georgiev, V. S.; Carlson, R. P.; Van Inwegen, R. G.; Khandwala, A. *J. Med. Chem.* **1979**, *22*, 348–352.

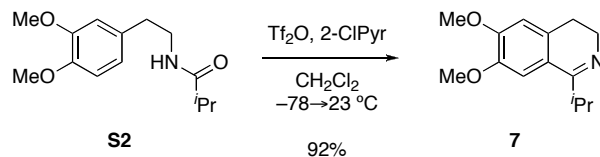

**1-Isopropyl-6,7-dimethoxy-3,4-dihydroisoquinoline (7, Figure 1):**

Trifluoromethanesulfonic anhydride (72  $\mu\text{L}$ , 0.44 mmol, 1.1 equiv) was added via syringe over 1 min to a stirred mixture of amide **S2** (100 mg, 0.398 mmol, 1 equiv) and 2-chloropyridine (45  $\mu\text{L}$ , 0.48 mmol, 1.1 equiv) in dichloromethane (2.0 mL) at  $-78^\circ\text{C}$ . After 5 min, the reaction mixture was placed in an ice-water bath and warmed to  $0^\circ\text{C}$ . After 5 min, the resulting solution was allowed to warm to  $23^\circ\text{C}$ . After 1 h, aqueous sodium hydroxide solution (0.5 mL, 1N) was introduced to neutralize the trifluoromethanesulfonate salts. Dichloromethane (5 mL) was added to dilute the mixture and the layers were separated. The organic layer was washed with brine (2 mL), was dried over anhydrous sodium sulfate, and was filtered. The volatiles were removed under reduced pressure, and the residue was purified by flash column chromatography (eluent: 5 $\rightarrow$ 40% EtOAc in hexanes;  $\text{Al}_2\text{O}_3$ : 15  $\times$  1.5 cm) on alumina gel to give the 3,4-dihydroisoquinoline derivative **7** as a pale yellow oil (85 mg, 92%).

$^1\text{H NMR}$  (500 MHz,  $\text{CDCl}_3$ ,  $20^\circ\text{C}$ )  $\delta$ : 7.04 (s, 1H, ArH), 6.70 (s, 1H, ArH), 3.92 (s, 3H, OCH<sub>3</sub>), 3.91 (s, 3H, OCH<sub>3</sub>), 3.66–3.61 (m, 2H, CH<sub>2</sub>CH<sub>2</sub>N), 3.20 (septet, 1H,  $J = 6.7$  Hz, CH(CH<sub>3</sub>)<sub>2</sub>), 2.61–2.56 (m, 2H, CH<sub>2</sub>CH<sub>2</sub>N), 1.21 (d, 6H,  $J = 6.7$  Hz, CH(CH<sub>3</sub>)<sub>2</sub>).

$^{13}\text{C NMR}$  (125 MHz,  $\text{CDCl}_3$ ,  $20^\circ\text{C}$ )  $\delta$ : 170.9, 150.6, 147.5, 132.2, 121.8, 110.5, 108.7, 56.4, 56.1, 47.1, 32.0, 26.2, 21.0.

FTIR (neat)  $\text{cm}^{-1}$ : 3386 (w), 2963 (s), 2935 (s), 2868 (m), 2835 (m), 2068 (w), 1624 (s), 1605 (s), 1572 (s), 1515 (s), 1465 (s), 1367 (m), 1358 (m), 1279 (s), 1209 (s), 1136 (s).

HRMS (ESI): calc'd for  $\text{C}_{14}\text{H}_{20}\text{NO}_2$   $[\text{M}+\text{H}]^+$ : 234.1489, found: 234.1441.

TLC (15% EtOAc in hexanes),  $R_f$ : 0.28 (UV).

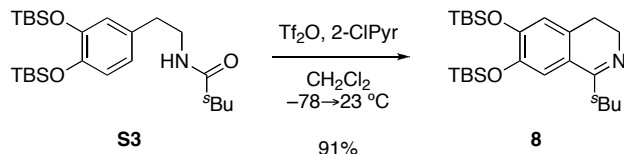

**1-sec-Butyl-6,7-bis(tert-butyldimethylsilyloxy)-3,4-dihydroisoquinoline (8, Figure 1):**

Trifluoromethanesulfonic anhydride (78  $\mu$ L, 0.47 mmol, 1.1 equiv) was added via syringe over 1 min to a stirred mixture of amide **S3** (200 mg, 0.429 mmol, 1 equiv) and 2-chloropyridine (49  $\mu$ L, 0.52 mmol, 1.1 equiv) in dichloromethane (1.4 mL) at  $-78^{\circ}\text{C}$ . After 5 min, the reaction mixture was placed in an ice-water bath and warmed to  $0^{\circ}\text{C}$ . After 5 min, the resulting solution was allowed to warm to  $23^{\circ}\text{C}$ . After 1 h, triethylamine (100  $\mu$ L) was introduced to neutralize the trifluoromethanesulfonate salts. The volatiles were removed under reduced pressure, and the residue was purified by flash column chromatography (eluent: 5% EtOAc in hexanes;  $\text{Al}_2\text{O}_3$ :  $15 \times 1.5$  cm) on alumina gel to give 3,4-dihydroisoquinoline derivative **8** as a pale yellow oil (175 mg, 91%).

$^1\text{H}$  NMR (500 MHz,  $\text{CDCl}_3$ ,  $20^{\circ}\text{C}$ )  $\delta$ : 7.02 (s, 1H, ArH), 6.62 (s, 1H, ArH), 3.72–3.64 (m, 1H,  $\text{CH}_2\text{CH}_2\text{N}$ ), 3.61–3.53 (m, 1H,  $\text{CH}_2\text{CH}_2\text{N}$ ), 2.91–2.82 (m, 1H,  $\text{CH}(\text{CH}_3)\text{CH}_2\text{CH}_3$ ), 2.54–2.49 (m, 2H,  $\text{CH}_2\text{CH}_2\text{N}$ ), 1.83–1.73 (m, 1H,  $\text{CH}(\text{CH}_3)\text{CH}_2\text{CH}_3$ ), 1.50–1.39 (m, 1H,  $\text{CH}(\text{CH}_3)\text{CH}_2\text{CH}_3$ ), 1.19 (d, 3H,  $J = 6.8$  Hz,  $\text{CH}(\text{CH}_3)\text{CH}_2\text{CH}_3$ ), 1.03–0.99 (m, 18H,  $\text{OSi}(\text{C}(\text{CH}_3)_3)(\text{CH}_3)_2$ ), 0.93 (t, 3H,  $J = 7.4$  Hz,  $\text{CH}(\text{CH}_3)\text{CH}_2\text{CH}_3$ ), 0.24–0.21 (m, 12H,  $\text{OSi}(\text{C}(\text{CH}_3)_3)(\text{CH}_3)_2$ ).

$^{13}\text{C}$  NMR (125 MHz,  $\text{CDCl}_3$ ,  $20^{\circ}\text{C}$ )  $\delta$ : 170.3, 148.6, 145.2, 132.0, 123.1, 119.9, 118.1, 47.2, 38.9, 28.3, 26.1, 26.0, 26.0, 18.6, 18.6, 18.3, 12.2,  $-3.9$ ,  $-3.9$ ,  $-3.9$ .

FTIR (neat)  $\text{cm}^{-1}$ : 2932 (s), 2896 (s), 2859 (s), 1623 (m), 1603 (m), 1560 (s), 1508 (s), 1473 (s), 1463 (s), 1429 (m), 1410 (s), 1322 (s), 1255 (s), 1195 (s), 1138 (s), 1055 (w), 1004 (m).

HRMS (ESI): calc'd for  $\text{C}_{25}\text{H}_{46}\text{NO}_2\text{Si}_2$   $[\text{M}+\text{H}]^+$ : 448.3062, found: 448.3050.

TLC (10% EtOAc in hexanes),  $R_f$ : 0.45 (UV).

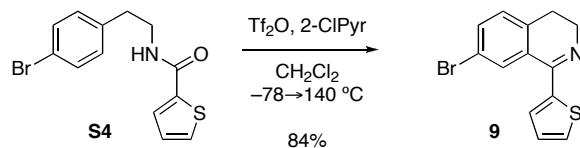

**7-Bromo-1-(thiophen-2-yl)-3,4-dihydroisoquinoline (9, Figure 1):**

Trifluoromethanesulfonic anhydride (59  $\mu\text{L}$ , 0.36 mmol, 1.1 equiv) was added via syringe over 1 min to a stirred mixture of amide **S4** (100 mg, 0.322 mmol, 1 equiv) and 2-chloropyridine (37  $\mu\text{L}$ , 0.39 mmol, 1.2 equiv) in dichloromethane (1.1 mL) at  $-78^\circ\text{C}$ . After 5 min, the reaction mixture was placed in an ice-water bath and warmed to  $0^\circ\text{C}$ . After 5 min, the resulting solution was allowed to warm to  $23^\circ\text{C}$  for 5 min before the reaction vessel was placed into a microwave reactor and heated to  $140^\circ\text{C}$ . After 5 min, the reaction vessel was removed from the microwave reactor and allowed to cool to  $23^\circ\text{C}$  before triethylamine (100  $\mu\text{L}$ ) was introduced to neutralize the trifluoromethanesulfonate salts. The volatiles were removed under reduced pressure, and the residue was purified by flash column chromatography (eluent: 5% EtOAc in hexanes;  $\text{Al}_2\text{O}_3$ :  $15 \times 1.5$  cm) on alumina gel to give the 3,4-dihydroisoquinoline derivative **9** as a pale yellow oil (79 mg, 84%).

$^1\text{H}$  NMR (500 MHz,  $\text{CDCl}_3$ ,  $20^\circ\text{C}$ )  $\delta$ : 7.83 (d, 1H,  $J = 2.0$  Hz, ArH), 7.56 (dd, 1H,  $J = 8.0, 2.0$  Hz, ArH), 7.46 (d, 1H,  $J = 5.1$  Hz, ArH), 7.37 (d, 1H,  $J = 3.6$  Hz, ArH), 7.19 (d, 1H,  $J = 8.0$  Hz, ArH), 7.14 (dd, 1H,  $J = 5.1, 3.7$  Hz, ArH), 3.82–3.77 (m, 2H,  $\text{CH}_2\text{CH}_2\text{N}$ ), 2.74–2.70 (m, 2H,  $\text{CH}_2\text{CH}_2\text{N}$ ).

$^{13}\text{C}$  NMR (125 MHz,  $\text{CDCl}_3$ ,  $20^\circ\text{C}$ )  $\delta$ : 159.9, 142.8, 138.0, 133.7, 130.3, 129.8, 129.3, 129.1, 128.6, 127.5, 120.3, 47.3, 26.1.

FTIR (neat)  $\text{cm}^{-1}$ : 3069 (w), 2943 (m), 2893 (w), 2838 (w), 1588 (s), 1552 (s), 1477 (m), 1430 (s), 1299 (s), 1221 (m), 1107 (m).

HRMS (ESI): calc'd for  $\text{C}_{13}\text{H}_{11}\text{BrNS}$   $[\text{M}+\text{H}]^+$ : 291.9790, found: 291.9779.

TLC (20% EtOAc in hexanes),  $R_f$ : 0.63 (UV).

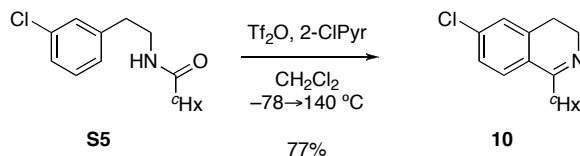

**6-Chloro-1-cyclohexyl-3,4-dihydroisoquinoline (10, Figure 1):**

Trifluoromethanesulfonic anhydride (68  $\mu\text{L}$ , 0.41 mmol, 1.1 equiv) was added via syringe over 1 min to a stirred mixture of amide **S5** (100 mg, 0.376 mmol, 1 equiv) and 2-chloropyridine (43  $\mu\text{L}$ , 0.45 mmol, 1.2 equiv) in dichloromethane (1.3 mL) at  $-78^\circ\text{C}$ . After 5 min, the reaction mixture was placed in an ice-water bath and warmed to  $0^\circ\text{C}$ . After 5 min, the resulting solution was allowed to warm to  $23^\circ\text{C}$ . After 5 min, the reaction vessel was placed into a microwave reactor and heated to  $140^\circ\text{C}$ . After 5 min, the reaction vessel was removed from the microwave reactor and allowed to cool to  $23^\circ\text{C}$  before triethylamine (100  $\mu\text{L}$ ) was introduced to neutralize the trifluoromethanesulfonate salts. The volatiles were removed under reduced pressure, and the residue was purified by flash column chromatography (eluent:  $0 \rightarrow 5\%$  EtOAc in hexanes;  $\text{Al}_2\text{O}_3$ :  $15 \times 1.5$  cm) on alumina gel to give the 3,4-dihydroisoquinoline derivative **10** as a pale yellow oil (72 mg, 77%).

$^1\text{H}$  NMR (500 MHz,  $\text{CDCl}_3$ ,  $20^\circ\text{C}$ )  $\delta$ : 7.44 (d, 1H,  $J = 8.3$  Hz, ArH), 7.28–7.25 (m, 1H, ArH), 7.19–7.18 (m, 1H, ArH), 3.68–3.63 (m, 2H,  $\text{CH}_2\text{CH}_2\text{N}$ ), 2.88–2.81 (m, 1H,  $^{\text{C}}_6\text{H}_{11}$ ), 2.65–2.60 (m, 2H,  $\text{CH}_2\text{CH}_2\text{N}$ ), 1.90–1.82 (m, 4H,  $^{\text{C}}_6\text{H}_{11}$ ), 1.78–1.72 (m, 1H,  $^{\text{C}}_6\text{H}_{11}$ ), 1.48–1.32 (m, 4H,  $^{\text{C}}_6\text{H}_{11}$ ), 1.32–1.22 (m, 1H,  $^{\text{C}}_6\text{H}_{11}$ ).

$^{13}\text{C}$  NMR (125 MHz,  $\text{CDCl}_3$ ,  $20^\circ\text{C}$ )  $\delta$ : 170.1, 140.4, 135.8, 127.9, 127.3, 127.1, 126.2, 46.7, 42.3, 31.4, 26.7, 26.4, 26.4.

FTIR (neat)  $\text{cm}^{-1}$ : 2930 (s), 2851 (s), 2668 (w), 1623 (s), 1594 (m), 1561 (m), 1482 (w), 1449 (m), 1199 (m), 1017 (m).

HRMS (ESI): calc'd for  $\text{C}_{15}\text{H}_{19}\text{ClN}$   $[\text{M}+\text{H}]^+$ : 248.1201, found: 248.1201.

TLC (20% EtOAc in hexanes),  $R_f$ : 0.67 (UV).

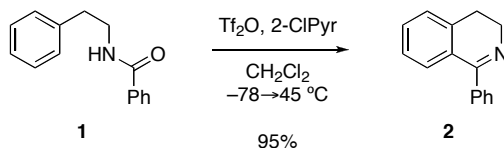

### **1-Phenyl-3,4-dihydroisoquinoline (2, Figure 1):**

Trifluoromethanesulfonic anhydride (61  $\mu\text{L}$ , 0.37 mmol, 1.1 equiv) was added via syringe over 1 min to a stirred mixture of amide **1** (75 mg, 0.33 mmol, 1 equiv) and 2-chloropyridine (38  $\mu\text{L}$ , 0.40 mmol, 1.2 equiv) in dichloromethane (1.7 mL) at  $-78^\circ\text{C}$ . After 5 min, the reaction mixture was placed in an ice-water bath and warmed to  $0^\circ\text{C}$ . After 5 min, the resulting solution was allowed to warm to  $23^\circ\text{C}$ . After 5 min, the reaction vessel was placed into a preheated oil bath at  $45^\circ\text{C}$  and maintained at that temperature. After 2 h, the mixture was allowed to cool to  $23^\circ\text{C}$  and aqueous sodium hydroxide solution (1 mL, 1N) was introduced to neutralize the trifluoromethanesulfonate salts. Dichloromethane (5 mL) was added to dilute the mixture and the layers were separated. The organic layer was washed with brine (2 mL), was dried over anhydrous sodium sulfate, and was filtered. The volatiles were removed under reduced pressure, and the residue was purified by flash column chromatography (eluent: 7.5 $\rightarrow$ 70% EtOAc in hexanes;  $\text{Al}_2\text{O}_3$ : 15  $\times$  1.5 cm) on alumina gel to give the 3,4-dihydroisoquinoline derivative **2**<sup>7</sup> as a pale yellow oil (66 mg, 95%).

$^1\text{H}$  NMR (500 MHz,  $\text{CDCl}_3$ ,  $20^\circ\text{C}$ )  $\delta$ : 7.64–7.61 (m, 2H, ArH), 7.47–7.39 (m, 4H, ArH), 7.31–7.25 (m, 3H, ArH), 3.90–3.85 (m, 2H,  $\text{CH}_2\text{CH}_2\text{N}$ ), 2.85–2.80 (m, 2H,  $\text{CH}_2\text{CH}_2\text{N}$ ).

$^{13}\text{C}$  NMR (125 MHz, DMSO,  $20^\circ\text{C}$ )  $\delta$ : 165.7, 138.6, 138.6, 130.7, 129.3, 128.5, 128.1, 128.0, 127.6, 127.1, 126.7, 47.1, 25.6.

FTIR (neat)  $\text{cm}^{-1}$ : 3059 (w), 3026 (w), 2939 (m), 2893 (w), 2839 (w), 1956 (w), 1608 (s), 1565 (m), 1445 (m), 1318 (s), 1307 (s), 1020 (m).

HRMS (ESI): calc'd for  $\text{C}_{15}\text{H}_{14}\text{N}$   $[\text{M}+\text{H}]^+$ : 208.1121, found: 208.1125.

TLC (15% EtOAc in hexanes),  $R_f$ : 0.37 (UV).

<sup>7</sup> For a prior report on the synthesis of **2**, see Parham, W. E.; Bradsher, C. K.; Hunt, D. A. *J. Org. Chem.* **1978**, *43*, 1606–1607.



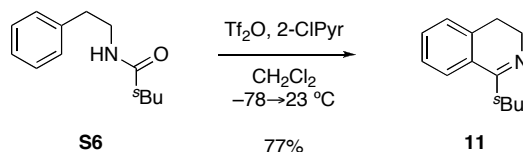

**1-sec-Butyl-3,4-dihydroisoquinoline (11, Figure 1):**

Trifluoromethanesulfonic anhydride (88  $\mu$ L, 0.54 mmol, 1.1 equiv) was added via syringe over 1 min to a stirred mixture of amide **S6** (100 mg, 0.487 mmol, 1 equiv) and 2-chloropyridine (55  $\mu$ L, 0.58 mmol, 1.2 equiv) in dichloromethane (1.6 mL) at  $-78^{\circ}\text{C}$ . After 5 min, the reaction mixture was placed in an ice-water bath and warmed to  $0^{\circ}\text{C}$ . After 5 min, the resulting solution was allowed to warm to  $23^{\circ}\text{C}$ . After 1 h, triethylamine (100  $\mu$ L) was introduced to neutralize the trifluoromethanesulfonate salts. The volatiles were removed under reduced pressure, and the residue was purified by flash column chromatography (eluent: 0 $\rightarrow$ 5% EtOAc in hexanes;  $\text{Al}_2\text{O}_3$ : 15  $\times$  1.5 cm) on alumina gel to give the 3,4-dihydroisoquinoline derivative **11** as a colorless oil (70 mg, 77%).

$^1\text{H}$  NMR (500 MHz,  $\text{CDCl}_3$ ,  $20^{\circ}\text{C}$ )  $\delta$ : 7.54–7.52 (m, 1H, ArH), 7.37–7.29 (m, 2H, ArH), 7.23–7.19 (m, 1H, ArH), 3.78–3.70 (m, 1H,  $\text{CH}_2\text{CH}_2\text{N}$ ), 3.64–3.57 (m, 1H,  $\text{CH}_2\text{CH}_2\text{N}$ ), 3.10–3.02 (m, 1H,  $\text{CH}(\text{CH}_3)\text{CH}_2\text{CH}_3$ ), 2.68–2.64 (m, 2H,  $\text{CH}_2\text{CH}_2\text{N}$ ), 1.84–1.75 (m, 1H,  $\text{CH}(\text{CH}_3)\text{CH}_2\text{CH}_3$ ), 1.53–1.44 (m, 1H,  $\text{CH}(\text{CH}_3)\text{CH}_2\text{CH}_3$ ), 1.21 (d, 3H,  $J = 7.0$  Hz,  $\text{CH}(\text{CH}_3)\text{CH}_2\text{CH}_3$ ), 0.92 (t, 3H,  $J = 7.5$  Hz,  $\text{CH}(\text{CH}_3)\text{CH}_2\text{CH}_3$ ).

$^{13}\text{C}$  NMR (125 MHz,  $\text{CDCl}_3$ ,  $20^{\circ}\text{C}$ )  $\delta$ : 171.0, 138.4, 130.2, 129.4, 127.7, 127.0, 124.8, 47.0, 38.6, 28.2, 26.6, 18.5, 12.1.

FTIR (neat)  $\text{cm}^{-1}$ : 3061 (w), 3023 (w), 2962 (s), 2934 (s), 2873 (s), 2845 (m), 1919 (w), 1809 (w), 1624 (s), 1572 (m), 1486 (w), 1453 (s), 1426 (m), 1377 (m), 1236 (m), 1019 (m).

HRMS (ESI): calc'd for  $\text{C}_{13}\text{H}_{18}\text{N}$   $[\text{M}+\text{H}]^+$ : 188.1439, found: 188.1438.

TLC (10% EtOAc in hexanes),  $R_f$ : 0.80 (UV).

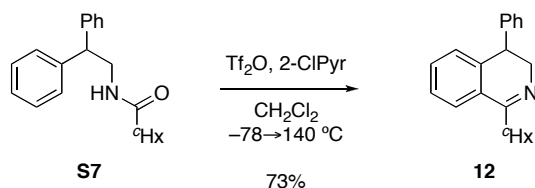

**1-Cyclohexyl-4-phenyl-3,4-dihydroisoquinoline (12, Figure 1):**

Trifluoromethanesulfonic anhydride (71  $\mu\text{L}$ , 0.43 mmol, 1.1 equiv) was added via syringe over 1 min to a stirred mixture of amide **S7** (120 mg, 0.390 mmol, 1 equiv) and 2-chloropyridine (44  $\mu\text{L}$ , 0.47 mmol, 1.2 equiv) in dichloromethane (1.3 mL) at  $-78 \text{ }^\circ\text{C}$ . After 5 min, the reaction mixture was placed in an ice-water bath and warmed to  $0 \text{ }^\circ\text{C}$ . After 5 min, the resulting solution was allowed to warm to  $23 \text{ }^\circ\text{C}$ . After 5 min, the reaction vessel was placed into a microwave reactor and heated to  $140 \text{ }^\circ\text{C}$ . After 5 min, the reaction vessel was removed from the microwave reactor and allowed to cool to  $23 \text{ }^\circ\text{C}$  before triethylamine (100  $\mu\text{L}$ ) was introduced to neutralize the trifluoromethanesulfonate salts. Dichloromethane (5 mL) was added to dilute the mixture. The organic layer was washed with brine (2 mL), was dried over anhydrous sodium sulfate, and was filtered. The volatiles were removed under reduced pressure, and the residue was purified by flash column chromatography (eluent: 10% EtOAc in hexanes;  $\text{Al}_2\text{O}_3$ :  $15 \times 1.5 \text{ cm}$ ) on alumina gel to give the 3,4-dihydroisoquinoline derivative **12** as a pale yellow oil (83 mg, 73%).

$^1\text{H}$  NMR (500 MHz,  $\text{CDCl}_3$ ,  $20 \text{ }^\circ\text{C}$ )  $\delta$ : 7.62–7.59 (m, 1H, ArH), 7.36–7.30 (m, 4H, ArH), 7.29–7.24 (m, 1H, ArH), 7.21–7.17 (m, 2H, ArH), 6.96–6.93 (m, 1H, ArH), 4.04–3.81 (m, 3H,  $\text{CHCH}_2\text{N}$ ), 3.02–2.95 (m, 1H,  $^{\circ}\text{C}_6\text{H}_{11}$ ), 2.01–1.72 (m, 5H,  $^{\circ}\text{C}_6\text{H}_{11}$ ), 1.54–1.35 (m, 4H,  $^{\circ}\text{C}_6\text{H}_{11}$ ), 1.35 (m, 1H,  $^{\circ}\text{C}_6\text{H}_{11}$ ).

$^{13}\text{C}$  NMR (125 MHz,  $\text{CDCl}_3$ ,  $20 \text{ }^\circ\text{C}$ )  $\delta$ : 171.1, 141.6, 141.0, 130.6, 128.8, 128.7, 128.6, 127.7, 127.2, 127.0, 124.8, 54.0, 42.5, 42.2, 31.5, 31.4, 26.8, 26.7, 26.4.

FTIR (neat)  $\text{cm}^{-1}$ : 3061 (w), 3027 (w), 2929 (s), 2851 (s), 1951 (w), 1625 (s), 1602 (w), 1571 (w), 1494 (m), 1450 (m), 1256 (w), 1003(w).

HRMS (ESI): calc'd for  $\text{C}_{21}\text{H}_{24}\text{N}$   $[\text{M}+\text{H}]^+$ : 290.1903, found: 290.1907.

TLC (20% EtOAc in hexanes),  $R_f$ : 0.38 (UV).

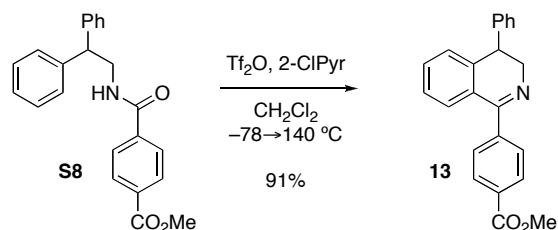

**Methyl 4-(4-phenyl-3,4-dihydroisoquinolin-1-yl)benzoate (13, Figure 1):**

Trifluoromethanesulfonic anhydride (51  $\mu\text{L}$ , 0.31 mmol, 1.1 equiv) was added via syringe over 1 min to a stirred mixture of amide **S8** (100 mg, 0.278 mmol, 1 equiv) and 2-chloropyridine (32  $\mu\text{L}$ , 0.33 mmol, 1.2 equiv) in dichloromethane (900  $\mu\text{L}$ ) at  $-78$  °C. After 5 min, the reaction mixture was placed in an ice-water bath and warmed to  $0$  °C. After 5 min, the resulting solution was allowed to warm to  $23$  °C. After 5 min, the reaction vessel was placed into a microwave reactor and heated to  $140$  °C. After 5 min, the reaction vessel was removed from the microwave reactor and allowed to cool to  $23$  °C before triethylamine (100  $\mu\text{L}$ ) was introduced to neutralize the trifluoromethanesulfonate salts. Dichloromethane (5 mL) was added to dilute the reaction mixture. The organic layer was washed with brine (2 mL), was dried over anhydrous sodium sulfate, and was filtered. The volatiles were removed under reduced pressure, and the residue was purified by flash column chromatography (eluent: 5 $\rightarrow$ 10% EtOAc in hexanes;  $\text{Al}_2\text{O}_3$ : 15  $\times$  1.5 cm) on alumina gel to give the 3,4-dihydroisoquinoline derivative **13** as a pale yellow oil (86 mg, 91%).

$^1\text{H}$  NMR (500 MHz,  $\text{CDCl}_3$ ,  $20$  °C)  $\delta$ : 8.14–8.11 (m, 2H, ArH), 7.73–7.70 (m, 2H, ArH), 7.41–7.35 (m, 3H, ArH), 7.32–7.26 (m, 5H, ArH), 7.02 (d, 1H,  $J = 7.5$  Hz, ArH), 4.25 (dd, 1H,  $J = 15.2, 5.6$  Hz,  $\text{CHCH}_2\text{N}$ ), 4.17 (dd, 1H,  $J = 11.1, 5.6$  Hz,  $\text{CHCH}_2\text{N}$ ), 4.04 (dd, 1H,  $J = 15.2, 11.1$  Hz,  $\text{CHCH}_2\text{N}$ ), 3.96 (s, 3H,  $\text{OCH}_3$ ).

$^{13}\text{C}$  NMR (125 MHz,  $\text{CDCl}_3$ ,  $20$  °C)  $\delta$ : 167.1, 167.0, 143.4, 141.6, 140.9, 131.5, 131.0, 129.7, 129.0, 129.0, 128.9, 128.3, 127.9, 127.6, 127.3, 127.1, 54.8, 52.5, 42.5.

FTIR (neat)  $\text{cm}^{-1}$ : 3061 (w), 3028 (w), 2950 (w), 2888 (w), 2842 (w), 1942 (w), 1723 (s), 1611 (m), 1569 (w), 1436 (m), 1311 (s), 1278 (s), 1115 (m), 1103 (m).

HRMS (ESI): calc'd for  $\text{C}_{23}\text{H}_{20}\text{NO}_2$   $[\text{M}+\text{H}]^+$ : 342.1489, found: 342.1495.

TLC (20% EtOAc in hexanes),  $R_f$ : 0.41 (UV).

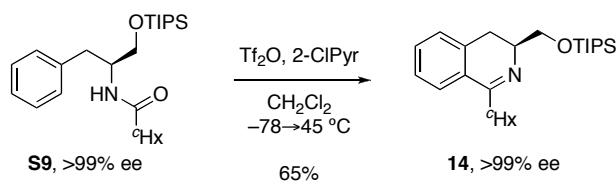

**(S)-1-Cyclohexyl-3-((triisopropylsilyloxy)methyl)-3,4-dihydroisoquinoline (14, Figure 1):**

Trifluoromethanesulfonic anhydride (65  $\mu$ L, 0.40 mmol, 1.1 equiv) was added via syringe over 1 min to a stirred mixture of amide **S9** (150 mg, 0.359 mmol, 1 equiv) and 2-chloropyridine (41  $\mu$ L, 0.43 mmol, 1.2 equiv) in dichloromethane (1.2 mL) at  $-78$  °C. After 5 min, the reaction mixture was placed in an ice-water bath and warmed to 0 °C. After 5 min, the resulting solution was allowed to warm to 23 °C. After 5 min, the reaction vessel was placed into a preheated oil bath at 45 °C and maintained at that temperature. After 2 h, triethylamine (100  $\mu$ L) was introduced to neutralize the trifluoromethanesulfonate salts. The volatiles were removed under reduced pressure, and the residue was purified by flash column chromatography (eluent: 0.5% EtOAc in hexanes; Al<sub>2</sub>O<sub>3</sub>: 15  $\times$  1.5 cm) on alumina gel to give the 3,4-dihydroisoquinoline derivative **14** as a colorless oil (94 mg, 65%). The enantiomeric excess of 3,4-dihydroisoquinoline **14** was determined to be >99% ee by chiral HPLC analysis [Chiralpak OD-H; 0.5 mL/min; 5% iPrOH in hexanes;  $t_r$ (minor) = 14.5 min,  $t_r$ (major) = 17.7 min].

<sup>1</sup>H NMR (500 MHz, CDCl<sub>3</sub>, 20 °C)  $\delta$ : 7.50 (d, 1H,  $J$  = 7.2 Hz, ArH), 7.34–7.30 (m, 1H, ArH), 7.30–7.26 (m, 1H, ArH), 7.22 (d, 1H,  $J$  = 7.3 Hz, ArH), 4.12–4.06 (m, 1H, CH<sub>2</sub>CHCH<sub>2</sub>O), 3.64–3.56 (m, 2H, CH<sub>2</sub>CHCH<sub>2</sub>O), 2.94–2.85 (m, 2H, CH<sub>2</sub>CHCH<sub>2</sub>O, <sup>6</sup>C<sub>6</sub>H<sub>11</sub>), 2.59 (dd, 1H,  $J$  = 15.7, 9.9 Hz, CH<sub>2</sub>CHCH<sub>2</sub>O), 1.95–1.70 (m, 5H, <sup>6</sup>C<sub>6</sub>H<sub>11</sub>), 1.56–1.48 (m, 1H, <sup>6</sup>C<sub>6</sub>H<sub>11</sub>), 1.44–1.04 (m, 25H, <sup>6</sup>C<sub>6</sub>H<sub>11</sub>, OSi(CH(CH<sub>3</sub>)<sub>2</sub>)<sub>3</sub>).

<sup>13</sup>C NMR (125 MHz, CDCl<sub>3</sub>, 20 °C)  $\delta$ : 170.5, 137.9, 130.2, 129.3, 128.4, 126.8, 124.6, 66.7, 58.3, 42.3, 31.8, 31.1, 29.1, 26.8, 26.7, 26.5, 18.2, 12.2.

FTIR (neat) cm<sup>-1</sup>: 2930 (s), 2865 (s), 1623 (m), 1571 (w), 1463 (m), 1381 (w), 1257 (w), 1124 (m).

HRMS (ESI): calc'd for C<sub>25</sub>H<sub>42</sub>NOSi [M+H]<sup>+</sup>: 400.3030, found: 400.3014.

TLC (10% EtOAc in hexanes),  $R_f$ : 0.83 (UV).

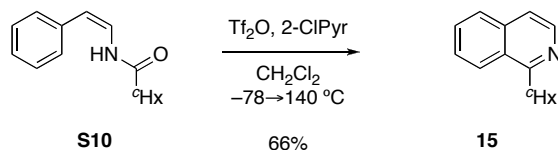

### **1-Cyclohexylisoquinoline (15, Figure 1):**

Trifluoromethanesulfonic anhydride (30  $\mu$ L, 0.18 mmol, 1.1 equiv) was added via syringe over 1 min to a stirred mixture of amide **S10** (38 mg, 0.17 mmol, 1 equiv) and 2-chloropyridine (19  $\mu$ L, 0.20 mmol, 1.2 equiv) in dichloromethane (550  $\mu$ L) at  $-78$   $^{\circ}$ C. After 5 min, the reaction mixture was placed in an ice-water bath and warmed to  $0$   $^{\circ}$ C. After 5 min, the resulting solution was allowed to warm to  $23$   $^{\circ}$ C. After 5 min, the reaction vessel was placed into a microwave reactor and heated to  $140$   $^{\circ}$ C. After 5 min, the reaction vessel was removed from the microwave reactor and allowed to cool to  $23$   $^{\circ}$ C before triethylamine (100  $\mu$ L) was introduced to neutralize the trifluoromethanesulfonate salts. The volatiles were removed under reduced pressure, and the residue was purified by flash column chromatography (eluent: 5% EtOAc and 1% Et<sub>3</sub>N in hexanes; SiO<sub>2</sub>: 15  $\times$  1.5 cm) on neutralized silica gel to give the isoquinoline derivative **15**<sup>8</sup> as a white solid (23 mg, 66%).

<sup>1</sup>H NMR (500 MHz, CDCl<sub>3</sub>, 20  $^{\circ}$ C)  $\delta$ : 8.48 (d, 1H,  $J$  = 5.7 Hz, ArH), 8.23 (d, 1H,  $J$  = 8.3 Hz, ArH), 7.82 (d, 1H,  $J$  = 8.1 Hz, ArH), 7.66 (ddd, 1H,  $J$  = 8.0, 6.8, 1.2 Hz, ArH), 7.59 (ddd, 1H,  $J$  = 8.3, 6.9, 1.4 Hz, ArH), 7.49 (d, 1H,  $J$  = 5.7 Hz, ArH), 3.57 (tt, 1H,  $J$  = 11.6, 3.2 Hz, <sup>c</sup>C<sub>6</sub>H<sub>11</sub>), 2.04–1.91 (m, 4H, <sup>c</sup>C<sub>6</sub>H<sub>11</sub>), 1.88–1.75 (m, 3H, <sup>c</sup>C<sub>6</sub>H<sub>11</sub>), 1.54 (qt, 2H,  $J$  = 12.5, 3.1 Hz, <sup>c</sup>C<sub>6</sub>H<sub>11</sub>), 1.40 (qt, 1H,  $J$  = 12.7, 3.4 Hz, <sup>c</sup>C<sub>6</sub>H<sub>11</sub>).

<sup>13</sup>C NMR (125 MHz, CDCl<sub>3</sub>, 20  $^{\circ}$ C)  $\delta$ : 165.9, 142.1, 136.6, 129.7, 127.7, 127.0, 126.5, 124.9, 119.1, 41.7, 32.8, 27.1, 26.4.

FTIR (neat) cm<sup>-1</sup>: 3051 (w), 2927 (s), 2852 (m), 1683 (w), 1622 (w), 1586 (w), 1562 (m), 1501 (w), 1449 (m), 1391 (w), 1194 (w).

HRMS (ESI): calc'd for C<sub>15</sub>H<sub>18</sub>N [M+H]<sup>+</sup>: 212.1434, found: 212.1438.

TLC (20% EtOAc in hexanes),  $R_f$ : 0.57 (UV).

<sup>8</sup> For a prior report on the synthesis of **15**, see Minisci, F.; Vismara, E.; Fontana, F. *J. Org. Chem.* **1989**, *54*, 5224–5227.

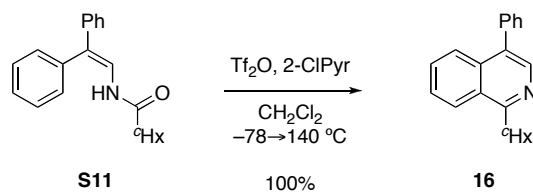

**1-Cyclohexyl-4-phenylisoquinoline (16, Figure 1):**

Trifluoromethanesulfonic anhydride (77  $\mu$ L, 0.47 mmol, 1.1 equiv) was added via syringe over 1 min to a stirred mixture of amide **S11** (130 mg, 0.426 mmol, 1 equiv) and 2-chloropyridine (48  $\mu$ L, 0.51 mmol, 1.2 equiv) in dichloromethane (1.4 mL) at  $-78$   $^{\circ}$ C. After 5 min, the reaction mixture was placed in an ice-water bath and warmed to  $0$   $^{\circ}$ C. After 5 min, the resulting solution was allowed to warm to  $23$   $^{\circ}$ C. After 5 min, the reaction vessel was placed into a microwave reactor and heated to  $140$   $^{\circ}$ C. After 5 min, the reaction vessel was removed from the microwave reactor and allowed to cool to  $23$   $^{\circ}$ C before triethylamine (100  $\mu$ L) was introduced to neutralize the trifluoromethanesulfonate salts. The volatiles were removed under reduced pressure, and the residue was purified by flash column chromatography (eluent: 5% EtOAc and 1% Et<sub>3</sub>N in hexanes; SiO<sub>2</sub>: 15  $\times$  1.5 cm) on neutralized silica gel to give the isoquinoline derivative **16**<sup>9</sup> as a pale yellow oil (122 mg, 100%).

<sup>1</sup>H NMR (500 MHz, CDCl<sub>3</sub>, 20  $^{\circ}$ C)  $\delta$ : 8.44 (s, 1H, ArH), 8.33–8.29 (m, 1H, ArH), 7.94–7.90 (m, 1H, ArH), 7.63–7.59 (m, 2H, ArH), 7.55–7.49 (m, 4H, ArH), 7.49–7.44 (m, 1H, ArH), 3.66 (tt, 1H, *J* = 11.7, 3.3 Hz, <sup>c</sup>C<sub>6</sub>H<sub>11</sub>), 2.08–2.01 (m, 2H, <sup>c</sup>C<sub>6</sub>H<sub>11</sub>), 2.01–1.94 (m, 2H, <sup>c</sup>C<sub>6</sub>H<sub>11</sub>), 1.93–1.82 (m, 3H, <sup>c</sup>C<sub>6</sub>H<sub>11</sub>), 1.57 (qt, 2H, *J* = 12.9, 3.5 Hz, <sup>c</sup>C<sub>6</sub>H<sub>11</sub>), 1.42 (qt, 1H, *J* = 12.8, 3.5 Hz, <sup>c</sup>C<sub>6</sub>H<sub>11</sub>).

<sup>13</sup>C NMR (125 MHz, CDCl<sub>3</sub>, 20  $^{\circ}$ C)  $\delta$ : 165.2, 141.9, 137.8, 134.9, 131.5, 130.4, 129.8, 128.7, 127.8, 126.8, 126.0, 125.9, 125.1, 41.7, 32.8, 27.1, 26.5.

FTIR (neat) cm<sup>-1</sup>: 3059 (w), 3030 (w), 2926 (s), 2851 (m), 1602 (w), 1615 (w), 1554 (m), 1508 (m), 1445 (m), 1393 (m), 1359 (w), 1350 (w).

HRMS (ESI): calc'd for C<sub>21</sub>H<sub>22</sub>N [M+H]<sup>+</sup>: 288.1752, found: 288.1755.

TLC (20% EtOAc in hexanes), *R*<sub>F</sub>: 0.68 (UV).

<sup>9</sup> For a prior report on the synthesis of **16**, see Kobayashi, K.; Hayashi, K.; Miyamoto, K.; Morikawa, O.; Konishi, H. *Synthesis* **2006**, 2934–2938.

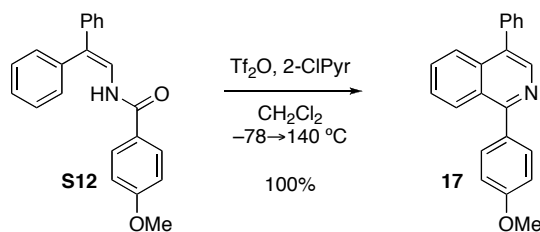

**1-(4-Methoxyphenyl)-4-phenylisoquinoline (17, Figure 1):**

Trifluoromethanesulfonic anhydride (72  $\mu\text{L}$ , 0.44 mmol, 1.1 equiv) was added via syringe over 1 min to a stirred mixture of amide **S12** (130 mg, 0.395 mmol, 1 equiv) and 2-chloropyridine (45  $\mu\text{L}$ , 0.47 mmol, 1.2 equiv) in dichloromethane (1.3 mL) at  $-78\text{ }^\circ\text{C}$ . After 5 min, the reaction mixture was placed in an ice-water bath and warmed to  $0\text{ }^\circ\text{C}$ . After 5 min, the resulting solution was allowed to warm to  $23\text{ }^\circ\text{C}$ . After 5 min, the reaction vessel was placed into a microwave reactor and heated to  $140\text{ }^\circ\text{C}$ . After 5 min, the reaction vessel was removed from the microwave reactor and allowed to cool to  $23\text{ }^\circ\text{C}$  before triethylamine (100  $\mu\text{L}$ ) was introduced to neutralize the trifluoromethanesulfonate salts. The volatiles were removed under reduced pressure, and the residue was purified by flash column chromatography (eluent: 10% EtOAc and 1%  $\text{Et}_3\text{N}$  in hexanes;  $\text{SiO}_2$ :  $15 \times 1.5\text{ cm}$ ) on neutralized silica gel to give the isoquinoline derivative **17** as a pale yellow oil (123 mg, 100%).

$^1\text{H NMR}$  (500 MHz,  $\text{CDCl}_3$ ,  $20\text{ }^\circ\text{C}$ )  $\delta$ : 8.55 (s, 1H, ArH), 8.22 (d, 1H,  $J = 8.5\text{ Hz}$ , ArH), 7.98 (d, 1H,  $J = 8.5\text{ Hz}$ , ArH), 7.74–7.70 (m, 2H, ArH), 7.68–7.64 (app. t, 1H,  $J = 7.7\text{ Hz}$ , ArH), 7.59–7.54 (m, 5H, ArH), 7.52–7.48 (m, 1H, ArH), 7.12–7.08 (m, 2H, ArH), 3.93 (s, 3H,  $\text{OCH}_3$ ).

$^{13}\text{C NMR}$  (125 MHz,  $\text{CDCl}_3$ ,  $20\text{ }^\circ\text{C}$ )  $\delta$ : 160.2, 160.0, 142.2, 137.4, 135.4, 132.3, 132.2, 131.5, 130.4, 130.2, 128.8, 128.1, 128.0, 127.0, 126.6, 125.4, 114.0, 55.6.

FTIR (neat)  $\text{cm}^{-1}$ : 3002 (w), 3033 (w), 2956 (w), 2933 (w), 2836 (w), 2044 (w), 1609 (s), 1578 (w), 1542 (w), 1514 (s), 1452 (w), 1385 (s), 1301 (w), 1250 (s), 1176 (m), 1032 (m).

HRMS (ESI): calc'd for  $\text{C}_{22}\text{H}_{18}\text{NO}$   $[\text{M}+\text{H}]^+$ : 312.1388, found: 312.1386.

TLC (20% EtOAc in hexanes),  $R_f$ : 0.38 (UV).

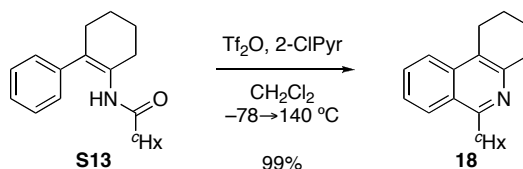

**6-Cyclohexyl-1,2,3,4-tetrahydrophenanthridine (18, Figure 1):**

Trifluoromethanesulfonic anhydride (64  $\mu\text{L}$ , 0.39 mmol, 1.1 equiv) was added via syringe over 1 min to a stirred mixture of amide **S13** (100 mg, 0.353 mmol, 1 equiv) and 2-chloropyridine (40  $\mu\text{L}$ , 0.42 mmol, 1.2 equiv) in dichloromethane (1.2 mL) at  $-78^\circ\text{C}$ . After 5 min, the reaction mixture was placed in an ice-water bath and warmed to  $0^\circ\text{C}$ . After 5 min, the resulting solution was allowed to warm to  $23^\circ\text{C}$ . After 5 min, the reaction vessel was placed into a microwave reactor and heated to  $140^\circ\text{C}$ . After 5 min, the reaction vessel was removed from the microwave reactor and allowed to cool to  $23^\circ\text{C}$  before triethylamine (100  $\mu\text{L}$ ) was introduced to neutralize the trifluoromethanesulfonate salts. The volatiles were removed under reduced pressure, and the residue was purified by flash column chromatography (eluent: 5% EtOAc and 1% Et<sub>3</sub>N in hexanes; SiO<sub>2</sub>: 15  $\times$  1.5 cm) on neutralized silica gel to give the isoquinoline derivative **18** as a colorless oil (93 mg, 99%).

<sup>1</sup>H NMR (500 MHz, CDCl<sub>3</sub>, 20  $^\circ\text{C}$ )  $\delta$ : 8.20 (d, 1H,  $J$  = 8.5 Hz, ArH), 7.91 (d, 1H,  $J$  = 8.4 Hz, ArH), 7.64 (ddd, 1H,  $J$  = 8.1, 6.9, 1.1 Hz, ArH), 7.50 (ddd, 1H,  $J$  = 8.1, 6.8, 1.0 Hz, ArH), 3.51 (tt, 1H,  $J$  = 11.5, 3.1 Hz, <sup>c</sup>C<sub>6</sub>H<sub>11</sub>), 3.08–3.02 (m, 4H, CH<sub>2</sub>CH<sub>2</sub>CH<sub>2</sub>CH<sub>2</sub>), 1.99–1.78 (m, 11H, CH<sub>2</sub>CH<sub>2</sub>CH<sub>2</sub>CH<sub>2</sub>, <sup>c</sup>C<sub>6</sub>H<sub>11</sub>), 1.53 (tt, 2H,  $J$  = 13.2, 4.1 Hz, <sup>c</sup>C<sub>6</sub>H<sub>11</sub>), 1.40 (tt, 1H,  $J$  = 12.7, 3.3 Hz, <sup>c</sup>C<sub>6</sub>H<sub>11</sub>).

<sup>13</sup>C NMR (125 MHz, CDCl<sub>3</sub>, 20  $^\circ\text{C}$ )  $\delta$ : 162.9, 149.1, 136.0, 129.3, 125.3, 125.3, 124.6, 122.8, 122.2, 41.5, 33.3, 32.7, 27.1, 26.4, 25.0, 23.4, 23.1.

FTIR (neat) cm<sup>-1</sup>: 3069 (w), 2927 (s), 2852 (m), 1616 (w), 1581 (w), 1566 (m), 1505 (w), 1449 (m), 1390 (w), 1335 (w), 1263 (w).

HRMS (ESI): calc'd for C<sub>19</sub>H<sub>24</sub>N [M+H]<sup>+</sup>: 266.1903, found: 266.1897.

TLC (20% EtOAc in hexanes), R<sub>f</sub>: 0.68 (UV).



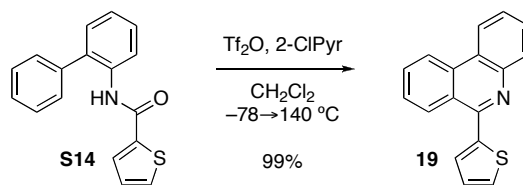

**6-(Thiophen-2-yl)phenanthridine (19, Figure 1):**

Trifluoromethanesulfonic anhydride (65  $\mu\text{L}$ , 0.39 mmol, 1.1 equiv) was added via syringe over 1 min to a stirred mixture of amide **S14** (100 mg, 0.358 mmol, 1 equiv) and 2-chloropyridine (41  $\mu\text{L}$ , 0.43 mmol, 1.2 equiv) in dichloromethane (1.2 mL) at  $-78\text{ }^{\circ}\text{C}$ . After 5 min, the reaction mixture was placed in an ice-water bath and warmed to  $0\text{ }^{\circ}\text{C}$ . After 5 min, the resulting solution was allowed to warm to  $23\text{ }^{\circ}\text{C}$ . After 5 min, the reaction vessel was placed into a microwave reactor and heated to  $140\text{ }^{\circ}\text{C}$ . After 5 min, the reaction vessel was removed from the microwave reactor and allowed to cool to  $23\text{ }^{\circ}\text{C}$  before triethylamine (100  $\mu\text{L}$ ) was introduced to neutralize the trifluoromethanesulfonate salts. The volatiles were removed under reduced pressure, and the residue was purified by flash column chromatography (eluent: 10% EtOAc and 1% Et<sub>3</sub>N in hexanes; SiO<sub>2</sub>: 15  $\times$  1.5 cm) on neutralized silica gel to give the phenanthridine derivative **19**<sup>10</sup> as a pale yellow oil (93 mg, 99%).

<sup>1</sup>H NMR (500 MHz, CDCl<sub>3</sub>, 20  $^{\circ}\text{C}$ )  $\delta$ : 8.71 (d, 1H,  $J$  = 8.3 Hz, ArH), 8.59 (dd, 2H,  $J$  = 7.9, 4.6 Hz, ArH), 8.22 (d, 1H,  $J$  = 8.2 Hz, ArH), 7.89 (t, 1H,  $J$  = 7.5 Hz, ArH), 7.78–7.65 (m, 4H, ArH), 7.58 (dd, 1H,  $J$  = 5.1, 1.0 Hz, ArH), 7.25 (dd, 1H,  $J$  = 5.2, 3.6 Hz, ArH).

<sup>13</sup>C NMR (125 MHz, CDCl<sub>3</sub>, 20  $^{\circ}\text{C}$ )  $\delta$ : 154.2, 143.9, 142.7, 133.8, 130.8, 130.4, 129.5, 129.1, 128.3, 128.1, 127.6, 127.6, 127.2, 124.9, 123.7, 122.5, 122.1.

FTIR (neat)  $\text{cm}^{-1}$ : 3070 (m), 1956 (w), 1812 (w), 1734 (w), 1610 (m), 1577 (m), 1562 (s), 1519 (m), 1484 (s), 1458 (s), 1430 (s).

HRMS (EI): calc'd for C<sub>17</sub>H<sub>12</sub>NS [M+H]<sup>+</sup>: 262.0685, found: 262.0683.

TLC (20% EtOAc in hexanes),  $R_f$ : 0.51 (UV, KMnO<sub>4</sub>).

<sup>10</sup> For formation of **19** as the product of a competing pathway in our intermolecular condensation reaction for synthesis of pyridines, see Movassaghi, M.; Hill, M. D.; Ahmad, O. K. *J. Am. Chem. Soc.* **2007**, *129*, 10096–10097.

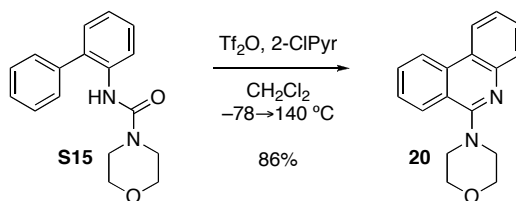

#### **4-(Phenanthridin-6-yl)morpholine (20, Figure 1):**

Trifluoromethanesulfonic anhydride (64  $\mu\text{L}$ , 0.39 mmol, 1.1 equiv) was added via syringe over 1 min to a stirred mixture of amide **S15** (100 mg, 0.354 mmol, 1 equiv) and 2-chloropyridine (40  $\mu\text{L}$ , 0.43 mmol, 1.2 equiv) in dichloromethane (1.2 mL) at  $-78$  °C. After 5 min, the reaction mixture was placed in an ice-water bath and warmed to 0 °C. After 5 min, the resulting solution was allowed to warm to 23 °C. After 5 min, the reaction vessel was placed into a microwave reactor and heated to 140 °C. After 5 min, the reaction vessel was removed from the microwave reactor and allowed to cool to 23 °C before triethylamine (100  $\mu\text{L}$ ) was introduced to neutralize the trifluoromethanesulfonate salts. The volatiles were removed under reduced pressure, and the residue was purified by flash column chromatography (eluent: 20% EtOAc and 1%  $\text{Et}_3\text{N}$  in hexanes;  $\text{SiO}_2$ : 15  $\times$  1.5 cm) on neutralized silica gel to give the phenanthridine derivative **20**<sup>11</sup> as a pale yellow oil (81 mg, 86%).

$^1\text{H}$  NMR (500 MHz,  $\text{CDCl}_3$ , 20 °C)  $\delta$ : 8.58 (d, 1H,  $J = 8.3$  Hz, ArH), 8.44 (d, 1H,  $J = 8.1$  Hz, ArH), 8.22 (d, 1H,  $J = 8.2$  Hz, ArH), 7.85 (d, 1H,  $J = 8.1$  Hz, ArH), 7.82–7.76 (m, 1H, ArH), 7.68–7.60 (m, 2H, ArH), 7.54–7.48 (m, 1H, ArH), 4.05–4.00 (m, 4H,  $\text{N}(\text{CH}_2\text{CH}_2)_2\text{O}$ ), 3.55–3.49 (m, 4H,  $\text{N}(\text{CH}_2\text{CH}_2)_2\text{O}$ ).

$^{13}\text{C}$  NMR (125 MHz,  $\text{CDCl}_3$ , 20 °C)  $\delta$ : 159.9, 143.7, 135.0, 130.2, 128.8, 128.6, 126.8, 126.4, 125.0, 122.8, 122.7, 121.9, 121.3, 67.1, 51.8.

FTIR (neat)  $\text{cm}^{-1}$ : 3070 (w), 2958 (m), 2890 (w), 2849 (m), 1946 (w), 1611 (m), 1582 (s), 1569 (s), 1524 (m), 1485 (m), 1454 (m), 1382 (s), 1363 (s), 1223 (s), 1117 (s), 1021 (m).

HRMS (ESI): calc'd for  $\text{C}_{17}\text{H}_{17}\text{N}_2\text{O}$   $[\text{M}+\text{H}]^+$ : 265.1335, found: 265.1326.

TLC (40% EtOAc in hexanes),  $R_f$ : 0.64 (UV).

<sup>11</sup> For a prior report on the synthesis of **20**, see Mikhailovskii, A. G.; Vakhrin, M. I. *Khim. Geterotsikl. Soedin.*, **1991**, 1361–1364.

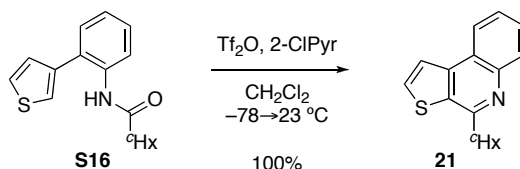

#### **4-Cyclohexyl thienof[2,3-c]quinoline (21, Figure 1):**

Trifluoromethanesulfonic anhydride (57  $\mu\text{L}$ , 0.35 mmol, 1.1 equiv) was added via syringe over 1 min to a stirred mixture of amide **S16** (90 mg, 0.32 mmol, 1 equiv) and 2-chloropyridine (36  $\mu\text{L}$ , 0.38 mmol, 1.2 equiv) in dichloromethane (1.1 mL) at  $-78^\circ\text{C}$ . After 5 min, the reaction mixture was placed in an ice-water bath and warmed to  $0^\circ\text{C}$ . After 5 min, the resulting solution was allowed to warm to  $23^\circ\text{C}$ . After 1 h, triethylamine (100  $\mu\text{L}$ ) was introduced to neutralize the trifluoromethanesulfonate salts. The volatiles were removed under reduced pressure, and the residue was purified by flash column chromatography (eluent: 10% EtOAc and 1%  $\text{Et}_3\text{N}$  in hexanes;  $\text{SiO}_2$ :  $15 \times 1.5$  cm) on neutralized silica gel to give the quinoline derivative **21** as a pale yellow oil (84 mg, 100%).

$^1\text{H}$  NMR (500 MHz,  $\text{CDCl}_3$ ,  $20^\circ\text{C}$ )  $\delta$ : 8.25 (dd, 1H,  $J = 8.1, 1.4$  Hz, ArH), 8.19 (dd, 1H,  $J = 8.3, 1.2$  Hz, ArH), 7.99 (d, 1H,  $J = 5.3$  Hz, ArH), 7.79 (d, 1H,  $J = 5.3$  Hz, ArH), 7.68 (ddd, 1H,  $J = 8.4, 7.0, 1.5$  Hz, ArH), 7.58 (ddd, 1H,  $J = 8.1, 6.9, 1.2$  Hz), 3.17 (tt, 1H,  $J = 11.6, 3.5$  Hz,  $^{\text{C}}_6\text{H}_{11}$ ), 2.15–2.08 (m, 2H,  $^{\text{C}}_6\text{H}_{11}$ ), 2.04–1.93 (m, 4H,  $^{\text{C}}_6\text{H}_{11}$ ), 1.86–1.80 (m, 1H,  $^{\text{C}}_6\text{H}_{11}$ ), 1.58–1.39 (m, 3H,  $^{\text{C}}_6\text{H}_{11}$ ).

$^{13}\text{C}$  NMR (125 MHz,  $\text{CDCl}_3$ ,  $20^\circ\text{C}$ )  $\delta$ : 160.9, 145.2, 142.0, 132.7, 130.2, 129.7, 128.0, 126.0, 123.6, 123.3, 122.3, 47.0, 31.7, 26.8, 26.2.

FTIR (neat)  $\text{cm}^{-1}$ : 3063 (m), 2927 (s), 2852 (s), 2667 (w), 1615 (w), 1557 (s), 1497 (s), 1464 (w), 1449 (s), 1367 (m), 1341 (m), 1282 (m), 1211 (m), 1160 (m).

HRMS (ESI): calc'd for  $\text{C}_{17}\text{H}_{18}\text{NS}$   $[\text{M}+\text{H}]^+$ : 268.1154, found: 268.1149.

TLC (20% EtOAc in hexanes),  $R_f$ : 0.59 (UV).

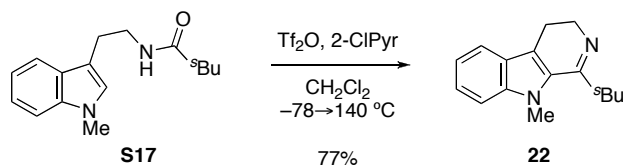

**N-Methyl-1-sec-butyl-3,4-dihydro- $\beta$ -carboline (22, Figure 1):**

Trifluoromethanesulfonic anhydride (70  $\mu$ L, 0.43 mmol, 1.1 equiv) was added via syringe over 1 min to a stirred mixture of amide **S17** (100 mg, 0.387 mmol, 1 equiv) and 2-chloropyridine (44  $\mu$ L, 0.46 mmol, 1.2 equiv) in dichloromethane (1.3 mL) at  $-78$   $^{\circ}$ C. After 5 min, the reaction mixture was placed in an ice-water bath and warmed to  $0$   $^{\circ}$ C. After 5 min, the resulting solution was allowed to warm to  $23$   $^{\circ}$ C. After 5 min, the reaction vessel was placed into a microwave reactor and heated to  $140$   $^{\circ}$ C. After 5 min, the reaction vessel was removed from the microwave reactor and allowed to cool to  $23$   $^{\circ}$ C before triethylamine (100  $\mu$ L) was introduced to neutralize the trifluoromethanesulfonate salts. The volatiles were removed under reduced pressure, and the residue was purified by flash column chromatography (eluent: 5% EtOAc in hexanes;  $\text{Al}_2\text{O}_3$ :  $15 \times 1.5$  cm) on alumina gel to give the 3,4-dihydro- $\beta$ -carboline derivative **22** as a pale yellow oil (71 mg, 77%).

$^1\text{H}$  NMR (500 MHz,  $\text{CDCl}_3$ ,  $20$   $^{\circ}$ C)  $\delta$ : 7.60 (app. dt, 1H,  $J = 7.9, 1.0$  Hz, ArH), 7.36–7.30 (m, 2H, ArH), 7.15 (ddd, 1H,  $J = 7.9, 6.3, 1.6$  Hz, ArH), 3.92 (s, 3H,  $\text{NCH}_3$ ), 3.91–3.84 (m, 1H,  $\text{CH}_2\text{CH}_2\text{N}$ ), 3.66–3.59 (m, 1H,  $\text{CH}_2\text{CH}_2\text{N}$ ), 3.12–3.04 (m, 1H,  $\text{CH}(\text{CH}_3)\text{CH}_2\text{CH}_3$ ), 2.83–2.68 (m, 2H,  $\text{CH}_2\text{CH}_2\text{N}$ ), 1.88–1.80 (m, 1H,  $\text{CH}(\text{CH}_3)\text{CH}_2\text{CH}_3$ ), 1.54–1.44 (1H, m,  $\text{CH}(\text{CH}_3)\text{CH}_2\text{CH}_3$ ), 1.26 (d, 3H,  $J = 6.7$  Hz,  $\text{CH}(\text{CH}_3)\text{CH}_2\text{CH}_3$ ), 0.93 (t, 3H,  $J = 7.5$  Hz,  $\text{CH}(\text{CH}_3)\text{CH}_2\text{CH}_3$ ).

$^{13}\text{C}$  NMR (125 MHz,  $\text{CDCl}_3$ ,  $20$   $^{\circ}$ C)  $\delta$ : 165.2, 138.9, 131.7, 124.7, 124.3, 120.0, 120.0, 119.1, 110.2, 48.2, 40.0, 32.7, 28.0, 19.9, 17.9, 11.9.

FTIR (neat)  $\text{cm}^{-1}$ : 3054 (w), 2962 (s), 2933 (s), 2872 (m), 2832 (m), 1596 (m), 1527 (s), 1460 (s), 1416 (m), 1370 (s), 1253 (m), 1232 (m), 1216 (m).

HRMS (ESI): calc'd for  $\text{C}_{16}\text{H}_{21}\text{N}_2$   $[\text{M}+\text{H}]^+$ : 241.1699, found: 241.1690.

TLC (20% EtOAc in hexanes),  $R_f$ : 0.69 (UV).

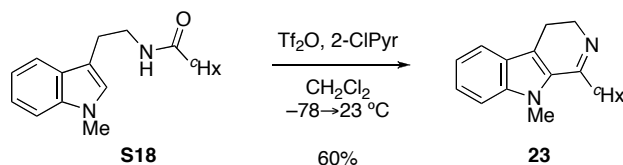

**N-Benzyl-1-cyclohexyl-3,4-dihydro- $\beta$ -carboline (23, Figure 1):**

Trifluoromethanesulfonic anhydride (64  $\mu$ L, 0.39 mmol, 1.1 equiv) was added via syringe over 1 min to a stirred mixture of amide **S18** (100 mg, 0.350 mmol, 1 equiv) and 2-chloropyridine (40  $\mu$ L, 0.42 mmol, 1.2 equiv) in dichloromethane (1.2 mL) at  $-78^{\circ}\text{C}$ . After 5 min, the reaction mixture was placed in an ice-water bath and warmed to  $0^{\circ}\text{C}$ . After 5 min, the resulting solution was allowed to warm to  $23^{\circ}\text{C}$ . After 2 h, triethylamine (100  $\mu$ L) was introduced to neutralize the trifluoromethanesulfonate salts. The volatiles were removed under reduced pressure, and the residue was purified by flash column chromatography (eluent: 0 $\rightarrow$ 5% EtOAc in hexanes;  $\text{Al}_2\text{O}_3$ : 15  $\times$  1.5 cm) on alumina gel to give the 3,4-dihydro- $\beta$ -carboline derivative **23** as a colorless oil (58 mg, 60%).

$^1\text{H}$  NMR (500 MHz,  $\text{CDCl}_3$ ,  $20^{\circ}\text{C}$ )  $\delta$ : 7.60 (ddd, 1H,  $J = 7.9, 0.9, 0.9$  Hz, ArH), 7.36–7.30 (m, 2H, ArH), 7.14 (ddd, 1H,  $J = 7.9, 6.3, 1.5$  Hz, ArH), 3.92 (s, 3H,  $\text{NCH}_3$ ), 3.77–3.72 (m, 2H,  $\text{CH}_2\text{CH}_2\text{N}$ ), 2.91 (tt, 1H,  $J = 11.2, 3.0$  Hz,  $^{\circ}\text{C}_6\text{H}_{11}$ ), 2.78–2.73 (m, 2H,  $\text{CH}_2\text{CH}_2\text{N}$ ), 1.99–1.85 (m, 4H,  $^{\circ}\text{C}_6\text{H}_{11}$ ), 1.79–1.72 (m, 1H,  $^{\circ}\text{C}_6\text{H}_{11}$ ), 1.55–1.45 (m, 2H,  $^{\circ}\text{C}_6\text{H}_{11}$ ), 1.44–1.25 (m, 3H,  $^{\circ}\text{C}_6\text{H}_{11}$ ).

$^{13}\text{C}$  NMR (125 MHz,  $\text{CDCl}_3$ ,  $20^{\circ}\text{C}$ )  $\delta$ : 165.2, 138.9, 131.2, 124.7, 124.3, 120.0, 120.0, 119.2, 110.2, 48.1, 43.8, 32.5, 31.2, 26.8, 26.4, 19.9.

FTIR (neat)  $\text{cm}^{-1}$ : 3054 (w), 2930 (s), 2850 (m), 1596 (w), 1527 (m), 1459 (m), 1416 (w), 1372 (m), 1306 (w), 1246 (w), 1211 (w).

HRMS (ESI): calc'd for  $\text{C}_{18}\text{H}_{23}\text{N}_2$   $[\text{M}+\text{H}]^+$ : 267.1856, found: 267.1847.

TLC (20% EtOAc in hexanes),  $R_f$ : 0.55 (UV).

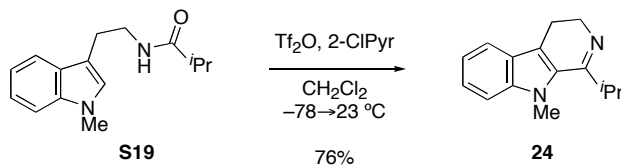

**N-Benzyl-1-iso-butyl-3,4-dihydro- $\beta$ -carboline (24, Figure 1):**

Trifluoromethanesulfonic anhydride (74  $\mu$ L, 0.45 mmol, 1.1 equiv) was added via syringe over 1 min to a stirred mixture of amide **S19** (100 mg, 0.409 mmol, 1 equiv) and 2-chloropyridine (46  $\mu$ L, 0.49 mmol, 1.2 equiv) in dichloromethane (1.4 mL) at  $-78$   $^{\circ}$ C. After 5 min, the reaction mixture was placed in an ice-water bath and warmed to  $0$   $^{\circ}$ C. After 5 min, the resulting solution was allowed to warm to  $23$   $^{\circ}$ C. After 2 h, triethylamine (100  $\mu$ L) was introduced to neutralize the trifluoromethanesulfonate salts. The volatiles were removed under reduced pressure, and the residue was purified by flash column chromatography (eluent:  $0 \rightarrow 5\%$  EtOAc in hexanes;  $\text{Al}_2\text{O}_3$ :  $15 \times 1.5$  cm) on alumina gel to give the 3,4-dihydro- $\beta$ -carboline derivative **24** as a colorless solid (70 mg, 76%).

$^1\text{H}$  NMR (500 MHz,  $\text{CDCl}_3$ ,  $20$   $^{\circ}$ C)  $\delta$ : 7.61 (d, 1H,  $J = 7.9$  Hz, ArH), 7.37–7.31 (m, 2H, ArH), 7.15 (ddd, 1H,  $J = 7.9, 6.3, 1.5$  Hz, ArH), 3.94 (s, 3H,  $\text{NCH}_3$ ), 3.78–3.73 (m, 2H,  $\text{CH}_2\text{CH}_2\text{N}$ ), 3.29 (septet, 1H,  $J = 6.7$  Hz,  $\text{CH}(\text{CH}_3)_2$ ), 2.79–2.74 (m, 2H,  $\text{CH}_2\text{CH}_2\text{N}$ ), 1.26 (d, 6H,  $J = 6.7$  Hz,  $\text{CH}(\text{CH}_3)_2$ ).

$^{13}\text{C}$  NMR (125 MHz,  $\text{CDCl}_3$ ,  $20$   $^{\circ}$ C)  $\delta$ : 165.8, 138.9, 131.2, 124.7, 124.3, 120.1, 120.0, 119.2, 110.2, 48.1, 33.4, 32.6, 20.7, 19.9.

FTIR (neat)  $\text{cm}^{-1}$ : 3054 (w), 2965 (s), 2932 (s), 2832 (m), 1596 (m), 1528 (s), 1460 (s), 1417 (w), 1370 (s), 1328 (m), 1236 (m), 1219 (m), 1064 (m).

HRMS (ESI): calc'd for  $\text{C}_{15}\text{H}_{19}\text{N}_2$   $[\text{M}+\text{H}]^+$ : 227.1543, found: 227.1547.

TLC (20% EtOAc in hexanes),  $R_f$ : 0.54 (UV).

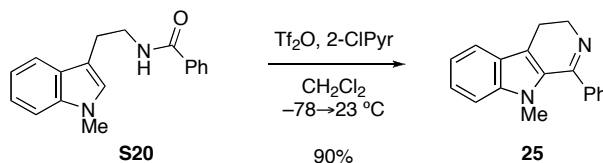

**N-Methyl-1-phenyl-3,4-dihydro- $\beta$ -carboline (25, Figure 1):**

Trifluoromethanesulfonic anhydride (69  $\mu$ L, 0.42 mmol, 1.1 equiv) was added via syringe over 1 min to a stirred mixture of amide **S20** (106 mg, 0.381 mmol, 1 equiv) and 2-chloropyridine (43  $\mu$ L, 0.46 mmol, 1.2 equiv) in dichloromethane (1.3 mL) at  $-78^{\circ}\text{C}$ . After 5 min, the reaction mixture was placed in an ice-water bath and warmed to  $0^{\circ}\text{C}$ . After 5 min, the resulting solution was allowed to warm to  $23^{\circ}\text{C}$ . After 2 h, triethylamine (100  $\mu$ L) was introduced to neutralize the trifluoromethanesulfonate salts. The volatiles were removed under reduced pressure, and the residue was purified by flash column chromatography (eluent: 5% EtOAc in hexanes;  $\text{Al}_2\text{O}_3$ :  $15 \times 1.5$  cm) on alumina gel to give the 3,4-dihydro- $\beta$ -carboline derivative **25** as a pale yellow oil (90 mg, 90%).

$^1\text{H}$  NMR (500 MHz,  $\text{CDCl}_3$ ,  $20^{\circ}\text{C}$ )  $\delta$ : 7.68 (app. dt, 1H,  $J = 8.0, 1.0$ , Hz, ArH), 7.62–7.58 (m, 2H, ArH), 7.49–7.44 (m, 3H, ArH), 7.37–7.31 (m, 2H, ArH), 7.20, (ddd, 1H,  $J = 7.9, 6.4, 1.5$  Hz, ArH), 3.97–3.93 (m, 2H,  $\text{CH}_2\text{CH}_2\text{N}$ ), 3.34 (s, 3H,  $\text{NCH}_3$ ), 2.96–2.91 (m, 2H,  $\text{CH}_2\text{CH}_2\text{N}$ ).

$^{13}\text{C}$  NMR (125 MHz,  $\text{CDCl}_3$ ,  $20^{\circ}\text{C}$ )  $\delta$ : 160.3, 139.5, 139.3, 131.0, 129.7, 128.7, 128.1, 124.8, 124.5, 120.2, 120.2, 119.6, 110.5, 49.0, 33.0, 20.0.

FTIR (neat)  $\text{cm}^{-1}$ : 3055 (w), 2940 (w), 2830 (w), 1587 (w), 1527 (s), 1460 (m), 1418 (m), 1374 (s), 1295 (m), 1254 (w), 1175 (w).

HRMS (ESI): calc'd for  $\text{C}_{18}\text{H}_{17}\text{N}_2$   $[\text{M}+\text{H}]^+$ : 261.1386, found: 261.1380.

TLC (30% EtOAc in hexanes),  $R_f$ : 0.54 (UV).

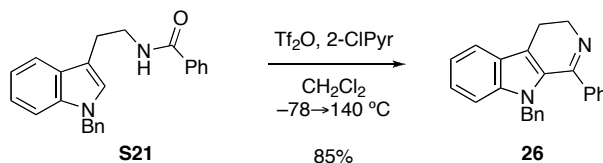

**N-Benzyl-1-phenyl-3,4-dihydro- $\beta$ -carboline (26, Figure 1):**

Trifluoromethanesulfonic anhydride (51  $\mu$ L, 0.31 mmol, 1.1 equiv) was added via syringe over 1 min to a stirred mixture of amide **S21** (100 mg, 0.282 mmol, 1 equiv) and 2-chloropyridine (32  $\mu$ L, 0.34 mmol, 1.2 equiv) in dichloromethane (940  $\mu$ L) at  $-78$   $^{\circ}$ C. After 5 min, the reaction mixture was placed in an ice-water bath and warmed to  $0$   $^{\circ}$ C. After 5 min, the resulting solution was allowed to warm to  $23$   $^{\circ}$ C. After 5 min, the reaction vessel was placed into a microwave reactor and heated to  $140$   $^{\circ}$ C. After 5 min, the reaction vessel was removed from the microwave reactor and allowed to cool to  $23$   $^{\circ}$ C before triethylamine (100  $\mu$ L) was introduced to neutralize the trifluoromethanesulfonate salts. The volatiles were removed under reduced pressure, and the residue was purified by flash column chromatography (eluent:  $0 \rightarrow 10\%$  EtOAc in hexanes;  $\text{Al}_2\text{O}_3$ :  $15 \times 1.5$  cm) on alumina gel to give the 3,4-dihydro- $\beta$ -carboline derivative **26** as a colorless oil (81 mg, 85%).

$^1\text{H}$  NMR (500 MHz,  $\text{CDCl}_3$ ,  $20$   $^{\circ}$ C)  $\delta$ : 7.71–7.68 (m, 1H, ArH), 7.48–7.45 (m, 2H, ArH), 7.42–7.37 (m, 1H, ArH), 7.35–7.30 (m, 2H, ArH), 7.29–7.27 (m, 2H, ArH), 7.21–7.18 (m, 1H, ArH), 7.15–7.09 (m, 3H, ArH), 6.60–6.58 (m, 2H, ArH), 4.99 (s, 2H,  $\text{NCH}_2$ ), 3.96–3.91 (m, 2H,  $\text{CH}_2\text{CH}_2\text{N}$ ), 2.98–2.93 (m, 2H,  $\text{CH}_2\text{CH}_2\text{N}$ ).

$^{13}\text{C}$  NMR (125 MHz,  $\text{CDCl}_3$ ,  $20$   $^{\circ}$ C)  $\delta$ : 160.5, 139.3, 139.1, 137.7, 130.6, 129.7, 128.6, 128.5, 128.1, 127.3, 126.1, 125.4, 124.8, 121.0, 120.6, 120.4, 111.5, 48.9, 48.6, 20.1.

FTIR (neat)  $\text{cm}^{-1}$ : 3057 (w), 2939 (w), 2885 (w), 2831 (w), 1588 (w), 1573 (w), 1526 (s), 1495 (w), 1451 (s), 1425 (m), 1373 (m), 1347 (m), 1297 (s), 1204 (w), 1171 (w).

HRMS (ESI): calc'd for  $\text{C}_{24}\text{H}_{21}\text{N}_2$   $[\text{M}+\text{H}]^+$ : 337.1699, found: 337.1695.

TLC (20% EtOAc in hexanes),  $R_f$ : 0.32 (UV).



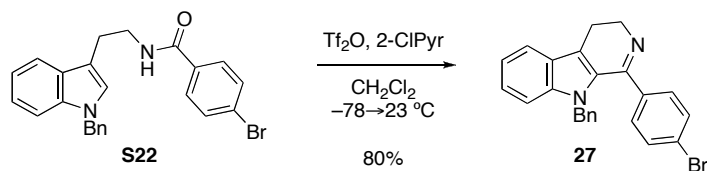

***N*-Benzyl-1-(4-bromophenyl)-3,4-dihydro- $\beta$ -carboline (27, Figure 1):**

Trifluoromethanesulfonic anhydride (57  $\mu\text{L}$ , 0.35 mmol, 1.0 equiv) was added via syringe over 1 min to a stirred mixture of amide **S22** (150 mg, 0.346 mmol, 1 equiv) and 2-chloropyridine (39  $\mu\text{L}$ , 0.42 mmol, 1.2 equiv) in dichloromethane (1.2 mL) at  $-78^\circ\text{C}$ . After 5 min, the reaction mixture was placed in an ice-water bath and warmed to  $0^\circ\text{C}$ . After 5 min, the resulting solution was allowed to warm to  $23^\circ\text{C}$ . After 2 h, triethylamine (100  $\mu\text{L}$ ) was introduced to neutralize the trifluoromethanesulfonate salts. The volatiles were removed under reduced pressure, and the residue was purified by flash column chromatography (eluent: 5% EtOAc and 1%  $\text{Et}_3\text{N}$  in hexanes;  $\text{Al}_2\text{O}_3$ :  $15 \times 1.5$  cm) on alumina gel to give the 3,4-dihydro- $\beta$ -carboline derivative **27** as a pale yellow solid (114 mg, 80%).

$^1\text{H}$  NMR (500 MHz,  $\text{CDCl}_3$ ,  $20^\circ\text{C}$ )  $\delta$ : 7.70 (d, 1H,  $J = 7.9$  Hz, ArH), 7.44 (d, 2H,  $J = 8.4$  Hz, ArH), 7.35–7.31 (m, 2H, ArH), 7.31–7.28 (m, 2H, ArH), 7.23–7.19 (m, 1H, ArH), 7.18–7.11 (m, 3H, ArH), 6.59 (d, 2H,  $J = 7.1$  Hz, ArH), 5.00 (s, 2H,  $\text{NCH}_2$ ), 3.94–3.88 (m, 2H,  $\text{CH}_2\text{CH}_2\text{N}$ ), 2.97–2.92 (m, 2H,  $\text{CH}_2\text{CH}_2\text{N}$ ).

$^{13}\text{C}$  NMR (125 MHz,  $\text{CDCl}_3$ ,  $20^\circ\text{C}$ )  $\delta$ : 159.5, 139.4, 138.1, 137.5, 131.7, 130.3, 129.7, 128.6, 127.5, 126.1, 125.3, 125.1, 124.0, 121.3, 120.8, 120.4, 111.5, 49.0, 48.8, 20.1.

FTIR (neat)  $\text{cm}^{-1}$ : 3030 (w), 2940 (w), 2886 (w), 2831 (w), 1589 (m), 1527 (s), 1489 (m), 1451 (s), 1425 (m), 1373 (m), 1347 (m), 1301 (s), 1291 (s), 1172 (w).

HRMS (ESI): calc'd for  $\text{C}_{24}\text{H}_{20}\text{BrN}_2$   $[\text{M}+\text{H}]^+$ : 415.0804, found: 415.0817.

TLC (20% EtOAc in hexanes),  $R_f$ : 0.45 (UV).

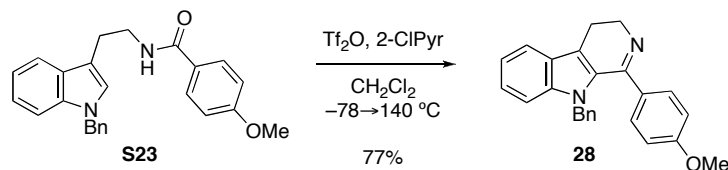

***N*-Benzyl-1-(4-methoxyphenyl)-3,4-dihydro- $\beta$ -carboline (28, Figure 1):**

Trifluoromethanesulfonic anhydride (64  $\mu\text{L}$ , 0.39 mmol, 1.0 equiv) was added via syringe over 1 min to a stirred mixture of amide **S23** (150 mg, 0.390 mmol, 1 equiv) and 2-chloropyridine (44  $\mu\text{L}$ , 0.47 mmol, 1.2 equiv) in dichloromethane (1.3 mL) at  $-78$  °C. After 5 min, the reaction mixture was placed in an ice-water bath and warmed to  $0$  °C. After 5 min, the resulting solution was allowed to warm to  $23$  °C. After 5 min, the reaction vessel was placed into a microwave reactor and heated to  $140$  °C. After 5 min, the reaction vessel was removed from the microwave reactor and allowed to cool to  $23$  °C before triethylamine (100  $\mu\text{L}$ ) was introduced to neutralize the trifluoromethanesulfonate salts. The volatiles were removed under reduced pressure, and the residue was purified by flash column chromatography (eluent:  $0 \rightarrow 10\%$  EtOAc and 1%  $\text{Et}_3\text{N}$  in hexanes;  $\text{Al}_2\text{O}_3$ :  $15 \times 1.5$  cm) on alumina gel to give the 3,4-dihydro- $\beta$ -carboline derivative **28** as a pale yellow solid (110 mg, 77%).

$^1\text{H}$  NMR (500 MHz,  $\text{CDCl}_3$ ,  $20$  °C)  $\delta$ : 7.71–7.68 (m, 1H, ArH), 7.47–7.43 (m, 2H, ArH), 7.29–7.27 (m, 2H, ArH), 7.21–7.17 (m, 1H, ArH), 7.15–7.10 (m, 3H, ArH), 6.87–6.83 (m, 2H, ArH), 6.64–6.60 (m, 2H, ArH), 5.05 (s, 2H,  $\text{NCH}_2$ ), 3.92–3.86 (m, 2H,  $\text{CH}_2\text{CH}_2\text{N}$ ), 3.84 (s, 3H,  $\text{OCH}_3$ ), 2.96–2.91 (m, 2H,  $\text{CH}_2\text{CH}_2\text{N}$ ).

$^{13}\text{C}$  NMR (125 MHz,  $\text{CDCl}_3$ ,  $20$  °C)  $\delta$ : 160.9, 160.0, 139.4, 137.7, 131.5, 130.8, 129.6, 128.5, 127.3, 126.2, 125.5, 124.8, 121.2, 120.6, 120.3, 113.9, 111.6, 55.5, 48.7, 48.7, 20.1.

FTIR (neat)  $\text{cm}^{-1}$ : 3059 (w), 3030 (w), 2936 (m), 2835 (m), 2195 (w), 1672 (w), 1608 (s), 1587 (m), 1526 (m), 1512 (s), 1496 (m), 1452 (m), 1372 (m), 1346 (w), 1302 (s), 1251 (s), 1173 (s).

HRMS (ESI): calc'd for  $\text{C}_{25}\text{H}_{23}\text{N}_2\text{O}$   $[\text{M}+\text{H}]^+$ : 367.1805, found: 367.1793.

TLC (40% EtOAc in hexanes),  $R_f$ : 0.55 (UV).

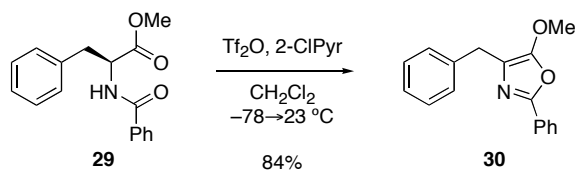

**4-Benzyl-2-phenyl-5-methoxyoxazole (30, Equation 1):**

Trifluoromethanesulfonic anhydride (77  $\mu$ L, 0.47 mmol, 1.1 equiv) was added via syringe over 1 min to a stirred mixture of amide **29** (120 mg, 0.424 mmol, 1 equiv) and 2-chloropyridine (48  $\mu$ L, 0.51 mmol, 1.2 equiv) in dichloromethane (1.4 mL) at  $-78$  °C. After 5 min, the reaction mixture was placed in an ice-water bath and warmed to 0 °C. After 5 min, the resulting solution was allowed to warm to 23 °C. After 15 min, triethylamine (100  $\mu$ L) was introduced to neutralize the trifluoromethanesulfonate salts. The volatiles were removed under reduced pressure, and the residue was purified by flash column chromatography (eluent: 0→5% EtOAc in hexanes; Al<sub>2</sub>O<sub>3</sub>: 15  $\times$  1.5 cm) on alumina gel to give the oxazole derivative **30** as a colorless oil (94 mg, 84%).

<sup>1</sup>H NMR (500 MHz, CDCl<sub>3</sub>, 20 °C)  $\delta$ : 7.95–7.91 (m, 2H, ArH), 7.44–7.36 (m, 3H, ArH), 7.35–7.28 (m, 4H, ArH), 7.23–7.19 (m, 1H, ArH), 3.95 (s, 3H, OCH<sub>3</sub>), 3.85 (s, 2H, CCH<sub>2</sub>).

<sup>13</sup>C NMR (125 MHz, CDCl<sub>3</sub>, 20 °C)  $\delta$ : 155.4, 152.3, 139.5, 129.6, 128.7, 128.7, 128.5, 127.9, 126.3, 125.5, 116.6, 61.2, 31.2.

FTIR (neat) cm<sup>-1</sup>: 3062 (w), 3028 (w), 2943 (w), 2850 (w), 1743 (w), 1657 (s), 1604 (m), 1553 (w), 1494 (m), 1451 (m), 1363 (m), 1319 (w), 1257 (m), 1118 (w).

HRMS (ESI): calc'd for C<sub>17</sub>H<sub>16</sub>NO<sub>2</sub> [M+H]<sup>+</sup>: 266.1176, found: 266.1182.

TLC (10% EtOAc in hexanes), R<sub>f</sub>: 0.50 (UV, KMnO<sub>4</sub>).

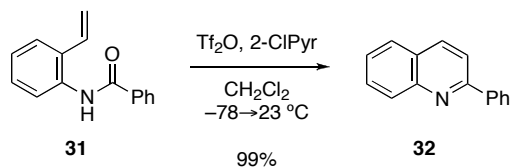

### **2-Phenylquinoline (32, Equation 2):**

Trifluoromethanesulfonic anhydride (45  $\mu\text{L}$ , 0.27 mmol, 1.1 equiv) was added via syringe over 1 min to a stirred mixture of amide **31** (55 mg, 0.25 mmol, 1 equiv) and 2-chloropyridine (28  $\mu\text{L}$ , 0.30 mmol, 1.2 equiv) in dichloromethane (820  $\mu\text{L}$ ) at  $-78^\circ\text{C}$ . After 5 min, the reaction mixture was placed in an ice-water bath and warmed to  $0^\circ\text{C}$ . After 5 min, the resulting solution was allowed to warm to  $23^\circ\text{C}$ . After 1 h, triethylamine (100  $\mu\text{L}$ ) was introduced to neutralize the trifluoromethanesulfonate salts. The volatiles were removed under reduced pressure, and the residue was purified by flash column chromatography (eluent: 5% EtOAc in hexanes;  $\text{SiO}_2$ :  $15 \times 1.5$  cm) on silica gel to give the quinoline derivative **32**<sup>12</sup> as a white solid (50 mg, 99%).

$^1\text{H}$  NMR (500 MHz,  $\text{CDCl}_3$ ,  $20^\circ\text{C}$ )  $\delta$ : 8.25 (d, 1H,  $J = 8.5$  Hz, ArH), 8.21–8.16 (m, 3H, ArH), 7.90 (d, 1H,  $J = 8.5$  Hz, ArH), 7.85 (d, 1H,  $J = 8.2$  Hz, ArH), 7.75 (ddd, 1H,  $J = 8.5, 7.0, 1.5$  Hz, ArH), 7.57–7.52 (m, 3H, ArH), 7.48 (tt, 1H,  $J = 7.3, 1.2$  Hz, ArH).

$^{13}\text{C}$  NMR (125 MHz,  $\text{CDCl}_3$ ,  $20^\circ\text{C}$ )  $\delta$ : 157.5, 148.4, 139.8, 137.0, 129.9, 129.9, 129.5, 129.0, 127.8, 127.7, 127.3, 126.5, 119.2.

FTIR (neat)  $\text{cm}^{-1}$ : 3189 (s), 3055 (w), 2091 (s), 1617 (w), 1597 (s), 1491 (m), 1447 (s).

HRMS (EI): calc'd for  $\text{C}_{15}\text{H}_{11}\text{N}$   $[\text{M}]^+$ : 205.0886, found: 205.0885.

Analysis: calc'd for  $\text{C}_{15}\text{H}_{11}\text{N}$ : C, 87.77; H, 5.40; N, 6.82, found: C, 87.55; H, 5.37; N, 6.84.

TLC (20% EtOAc in hexanes),  $R_f$ : 0.51 (UV, CAM).

<sup>12</sup> For an alternative condensation approach for the synthesis of **32**, see Movassaghi, M.; Hill, M. D.; Ahmad, O. K. *J. Am. Chem. Soc.* **2007**, *129*, 10096–10097.

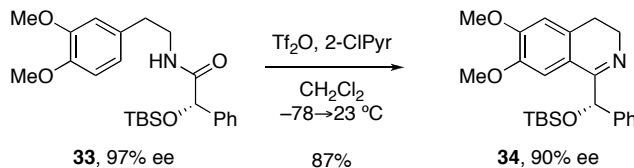

**(S)-1-(tert-Butyldimethylsilyloxy)(phenyl)methyl-6,7-dimethoxy-3,4-dihydroisoquinoline (34, Equation 3):**

Trifluoromethanesulfonic anhydride (42  $\mu\text{L}$ , 0.26 mmol, 1.1 equiv) was added via syringe over 1 min to a stirred mixture of amide **33**<sup>13</sup> (100 mg, 0.233 mmol, 1 equiv) and 2-chloropyridine (26  $\mu\text{L}$ , 0.28 mmol, 1.2 equiv) in dichloromethane (800  $\mu\text{L}$ ) at  $-78^\circ\text{C}$ . After 5 min, the reaction mixture was placed in an ice-water bath and warmed to  $0^\circ\text{C}$ . After 5 min, the resulting solution was allowed to warm to  $23^\circ\text{C}$ . After 1 h, triethylamine (75  $\mu\text{L}$ ) was introduced to neutralize the trifluoromethanesulfonate salts. The volatiles were removed under reduced pressure, and the residue was purified by flash column chromatography (eluent: 10% EtOAc in hexanes;  $\text{Al}_2\text{O}_3$ :  $15 \times 1.5$  cm) on alumina gel to give the 3,4-dihydroisoquinoline derivative **34** as a colorless oil (84 mg, 87%). The enantiomeric excess of 3,4-dihydroisoquinoline **34** was determined to be 90% ee by chiral HPLC analysis [Chiralpak OD-H; 1.0 mL/min; 1% iPrOH in hexanes;  $t_r$  (minor) = 9.1 min,  $t_r$  (major) = 18.5 min].

<sup>1</sup>H NMR (500 MHz,  $\text{CDCl}_3$ ,  $20^\circ\text{C}$ )  $\delta$ : 7.58–7.55 (m, 2H, ArH), 7.33–7.29 (m, 3H, ArH), 7.23–7.19 (m, 1H, ArH), 6.60 (s, 1H, ArH), 5.70 (s, 1H, CH(OTBS)Ph), 3.86 (s, 3H, OCH<sub>3</sub>), 3.82–3.70 (m, 2H, CH<sub>2</sub>CH<sub>2</sub>N), 3.68 (s, 3H, OCH<sub>3</sub>), 2.68–2.58 (m, 2H, CH<sub>2</sub>CH<sub>2</sub>N), 0.94 (s, 9H, OSi(C(CH<sub>3</sub>)<sub>3</sub>)(CH<sub>3</sub>)<sub>2</sub>), 0.18 (s, 3H, OSi(C(CH<sub>3</sub>)<sub>3</sub>)(CH<sub>3</sub>)<sub>2</sub>),  $-0.01$  (s, 3H, OSi(C(CH<sub>3</sub>)<sub>3</sub>)(CH<sub>3</sub>)<sub>2</sub>).

<sup>13</sup>C NMR (125 MHz,  $\text{CDCl}_3$ ,  $20^\circ\text{C}$ )  $\delta$ : 167.3, 150.3, 146.5, 142.3, 132.4, 128.4, 127.1, 124.9, 119.7, 111.3, 109.8, 80.5, 55.9, 55.8, 47.5, 26.1, 25.8, 18.4,  $-4.4$ ,  $-5.1$ .

FTIR (neat)  $\text{cm}^{-1}$ : 2952 (s), 2934 (s), 2894 (w), 2856 (m), 1622 (w), 1606 (w), 1571 (m), 1516 (s), 1493 (w), 1464 (m), 1406 (w), 1357 (m), 1321 (m), 1269 (s), 1212 (s), 1156 (m), 1097 (m).

HRMS (ESI): calc'd for  $\text{C}_{24}\text{H}_{34}\text{NO}_3\text{Si}$   $[\text{M}+\text{H}]^+$ : 412.2302, found: 412.2307.

TLC (20% EtOAc in hexanes),  $R_f$ : 0.53 (UV).

<sup>13</sup> (S)-2-(Tert-butyldimethylsilyloxy)-N-(3,4-dimethoxyphenethyl)-2-phenylethanamide (**33**) was prepared by an 1-ethyl-3-(3-dimethylaminopropyl) carbodiimide hydrochloride (EDC) promoted coupling of 2-(3,4-dimethoxyphenyl)ethanamine with (S)-2-(tert-butyldimethylsilyloxy)-2-phenylethanoic acid (Bremner, J. B.; Perkins, D. F. *Tetrahedron* **2005**, *61*, 2659). The enantiomeric excess of amide **33** was determined to be 97% ee by chiral HPLC analysis [Chiralpak AD-H; 1.0 mL/min; 7% iPrOH in hexanes;  $t_r$  (minor) = 8.8 min,  $t_r$  (major) = 22.2 min].

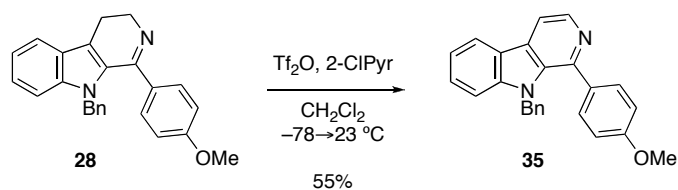

**N-Benzyl-1-(4-methoxyphenyl)- $\beta$ -carboline (35, Figure 2):**

Trifluoromethanesulfonic anhydride (48  $\mu\text{L}$ , 0.29 mmol, 1.1 equiv) was added via syringe over 1 min to a stirred mixture of 3,4-dihydro- $\beta$ -carboline **28** (96 mg, 0.26 mmol, 1 equiv) and 2-chloropyridine (30  $\mu\text{L}$ , 0.31 mmol, 1.2 equiv) in dichloromethane (870  $\mu\text{L}$ ) at  $-78^\circ\text{C}$ . After 5 min, the reaction mixture was placed in an ice-water bath and warmed to  $0^\circ\text{C}$ . After 5 min, the resulting solution was allowed to warm to  $23^\circ\text{C}$ . After 2 h, triethylamine (100  $\mu\text{L}$ ) was introduced to neutralize the trifluoromethanesulfonate salts. The volatiles were removed under reduced pressure, and the residue was purified by flash column chromatography (eluent: 20%  $\rightarrow$  40% EtOAc and 1%  $\text{Et}_3\text{N}$  in hexanes;  $\text{Al}_2\text{O}_3$ :  $15 \times 1.5$  cm) on alumina gel to give the  $\beta$ -carboline derivative **35** as a pale yellow solid (53 mg, 55%).

$^1\text{H}$  NMR (500 MHz,  $\text{CDCl}_3$ ,  $20^\circ\text{C}$ )  $\delta$ : 8.54 (d, 1H,  $J = 5.2$  Hz, ArH), 8.23 (d, 1H,  $J = 8.2$  Hz, ArH), 8.01 (d, 1H,  $J = 5.1$  Hz, ArH), 7.56–7.52 (m, 1H, ArH), 7.36–7.31 (m, 4H, ArH), 7.18–7.11 (m, 3H, ArH), 6.85–6.81 (m, 2H, ArH), 6.64 (d, 2H,  $J = 6.5$  Hz, ArH), 5.28 (s, 2H,  $\text{NCH}_2$ ), 3.84 (s, 3H,  $\text{OCH}_3$ ).

$^{13}\text{C}$  NMR (125 MHz,  $\text{C}_6\text{D}_6$ ,  $20^\circ\text{C}$ )  $\delta$ : 160.0, 145.1, 143.0, 139.5, 137.6, 135.2, 133.0, 131.1, 130.7, 128.5, 128.5, 128.3, 127.0, 125.9, 122.2, 121.7, 120.3, 113.5, 111.1, 54.7, 48.2.

FTIR (neat)  $\text{cm}^{-1}$ : 3032 (w), 2932 (w), 2836 (w), 1890 (w), 1620 (m), 1609 (m), 1560 (w), 1513 (s), 1496 (m), 1449 (s), 1418 (m), 1316 (m), 1247 (s), 1203 (m), 1174 (m).

HRMS (ESI): calc'd for  $\text{C}_{25}\text{H}_{21}\text{N}_2\text{O}$   $[\text{M}+\text{H}]^+$ : 365.1648, found: 365.1651.

TLC (40% EtOAc in hexanes),  $R_f$ : 0.55 (UV).

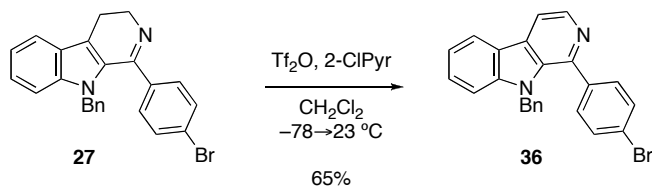

**N-Benzyl-1-(4-bromophenyl)- $\beta$ -carboline (36, Figure 2):**

Trifluoromethanesulfonic anhydride (51  $\mu\text{L}$ , 0.31 mmol, 1.1 equiv) was added via syringe over 1 min to a stirred mixture of 3,4-dihydro- $\beta$ -carboline **27** (117 mg, 0.281 mmol, 1 equiv) and 2-chloropyridine (32  $\mu\text{L}$ , 0.34 mmol, 1.2 equiv) in dichloromethane (940  $\mu\text{L}$ ) at  $-78$  °C. After 5 min, the reaction mixture was placed in an ice-water bath and warmed to  $0$  °C. After 5 min, the resulting solution was allowed to warm to  $23$  °C. After 2 h, triethylamine (100  $\mu\text{L}$ ) was introduced to neutralize the trifluoromethanesulfonate salts. The volatiles were removed under reduced pressure, and the residue was purified by flash column chromatography (eluent: 10% EtOAc in hexanes;  $\text{Al}_2\text{O}_3$ :  $15 \times 1.5$  cm) on alumina gel to give the  $\beta$ -carboline derivative **36** as a pale yellow solid (75 mg, 65%) and recovered starting material **27** (12 mg, 10%).

$^1\text{H}$  NMR (500 MHz,  $\text{CDCl}_3$ ,  $20$  °C)  $\delta$ : 8.54 (d, 1H,  $J = 5.1$  Hz, ArH), 8.24 (ddd, 1H,  $J = 8.1, 1.2, 0.6$  Hz, ArH), 8.05 (d, 1H,  $J = 5.1$  Hz, ArH), 7.57 (ddd, 1H,  $J = 8.3, 7.2, 1.3$  Hz, ArH), 7.43–7.40 (m, 2H, ArH), 7.38–7.34 (m, 2H, ArH), 7.26–7.23 (m, 2H, ArH), 7.20–7.13 (m, 3H, ArH), 6.62–6.58 (m, 2H, ArH), 5.25 (s, 2H,  $\text{NCH}_2$ ).

$^{13}\text{C}$  NMR (125 MHz,  $\text{CDCl}_3$ ,  $20$  °C)  $\delta$ : 143.4, 142.9, 139.0, 138.7, 136.9, 134.6, 131.3, 131.1, 130.9, 129.0, 128.7, 127.4, 125.7, 122.8, 121.8, 121.6, 120.6, 114.2, 110.7, 48.4.

FTIR (neat)  $\text{cm}^{-1}$ : 3059 (w), 3031 (w), 2921 (w), 2851 (w), 2207 (w), 1896 (w), 1621 (m), 1593 (w), 1559 (m), 1494 (m), 1448 (s), 1414 (s), 1330 (m), 1203 (s), 1128 (m).

HRMS (ESI): calc'd for  $\text{C}_{24}\text{H}_{18}\text{BrN}_2$   $[\text{M}+\text{H}]^+$ : 413.0648, found: 413.0645.

TLC (20% EtOAc in hexanes),  $R_f$ : 0.35 (UV).

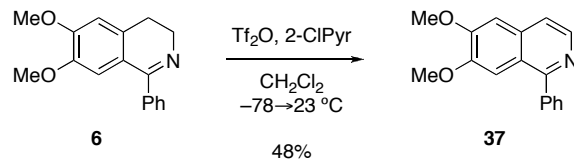

### **6,7-Dimethoxy-1-phenylisoquinoline (37, Figure 2):**

Trifluoromethanesulfonic anhydride (31  $\mu\text{L}$ , 0.19 mmol, 1.1 equiv) was added via syringe over 1 min to a stirred mixture of 3,4-dihydroisoquinoline **6** (45 mg, 0.17 mmol, 1 equiv) and 2-chloropyridine (19  $\mu\text{L}$ , 0.20 mmol, 1.2 equiv) in dichloromethane (560  $\mu\text{L}$ ) at  $-78^\circ\text{C}$ . After 5 min, the reaction mixture was placed in an ice-water bath and warmed to  $0^\circ\text{C}$ . After 5 min, the resulting solution was allowed to warm to  $23^\circ\text{C}$ . After 2 h, triethylamine (50  $\mu\text{L}$ ) was introduced to neutralize the trifluoromethanesulfonate salts. The volatiles were removed under reduced pressure, and the residue was purified by flash column chromatography (eluent: 10%  $\rightarrow$  20% EtOAc in hexanes;  $\text{Al}_2\text{O}_3$ : 15  $\times$  1.5 cm) on alumina gel to give the isoquinoline derivative **37** as a pale yellow solid (25 mg, 48%) and recovered starting material **6** (14 mg, 30%).

$^1\text{H}$  NMR (500 MHz,  $\text{CDCl}_3$ ,  $20^\circ\text{C}$ )  $\delta$ : 8.50 (d, 1H,  $J = 5.6$  Hz, ArH), 7.74–7.70 (m, 2H, ArH), 7.57–7.47 (m, 4H, ArH), 7.39 (s, 1H, ArH), 7.15 (s, 1H, ArH), 4.07 (s, 3H,  $\text{OCH}_3$ ), 3.88 (s, 3H,  $\text{OCH}_3$ ).

$^{13}\text{C}$  NMR (125 MHz,  $\text{CDCl}_3$ ,  $20^\circ\text{C}$ )  $\delta$ : 158.5, 152.8, 150.2, 141.6, 140.2, 133.9, 129.8, 128.6, 128.6, 122.7, 118.9, 105.7, 105.2, 56.3, 56.1.

FTIR (neat)  $\text{cm}^{-1}$ : 3005 (w), 2935 (w), 2835 (w), 1622 (w), 1559 (m), 1507 (s), 1478 (s), 1434 (m), 1419 (s), 1351 (w), 1310 (w), 1265 (s), 1236 (s), 1221 (s), 1163 (m), 1121 (s).

HRMS (ESI): calc'd for  $\text{C}_{17}\text{H}_{16}\text{NO}_2$   $[\text{M}+\text{H}]^+$ : 266.1176, found: 266.1174.

TLC (20% EtOAc in hexanes),  $R_f$ : 0.20 (UV).



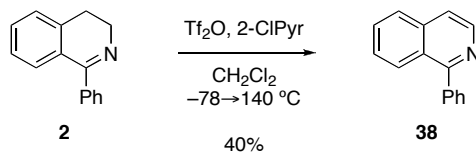

### **1-Phenylisoquinoline (38, Figure 2):**

Trifluoromethanesulfonic anhydride (84  $\mu\text{L}$ , 0.51 mmol, 2.1 equiv) was added via syringe over 1 min to a stirred mixture of 3,4-dihydroisoquinoline **2** (50 mg, 0.24 mmol, 1 equiv) and 2-chloropyridine (50  $\mu\text{L}$ , 0.53 mmol, 2.2 equiv) in dichloromethane (800  $\mu\text{L}$ ) at  $-78^\circ\text{C}$ . After 5 min, the reaction mixture was placed in an ice-water bath and warmed to  $0^\circ\text{C}$ . After 5 min, the resulting solution was allowed to warm to  $23^\circ\text{C}$ . After 5 min, the reaction vessel was placed into a microwave reactor and heated to  $140^\circ\text{C}$ . After 5 min, the reaction vessel was removed from the microwave reactor and allowed to cool to  $23^\circ\text{C}$  before triethylamine (50  $\mu\text{L}$ ) was introduced to neutralize the trifluoromethanesulfonate salts. The volatiles were removed under reduced pressure, and the residue was purified by flash column chromatography (eluent: 5% EtOAc in hexanes;  $\text{Al}_2\text{O}_3$ :  $15 \times 1.5$  cm) on alumina gel to give the isoquinoline derivative **38**<sup>14</sup> as a pale yellow solid (20 mg, 40%) and recovered starting material **2** (4 mg, 8%).

$^1\text{H}$  NMR (500 MHz,  $\text{CDCl}_3$ ,  $20^\circ\text{C}$ )  $\delta$ : 8.63 (d, 1H,  $J = 5.6$  Hz, ArH), 8.12 (d, 1H,  $J = 8.5$  Hz, ArH), 7.90 (d, 1H,  $J = 8.3$  Hz, ArH), 7.73–7.69 (m, 3H, ArH), 7.67 (d, 1H,  $J = 5.7$  Hz, ArH), 7.58–7.49 (m, 4H, ArH).

$^{13}\text{C}$  NMR (125 MHz,  $\text{CDCl}_3$ ,  $20^\circ\text{C}$ )  $\delta$ : 160.9, 142.4, 139.8, 137.1, 130.2, 130.1, 128.8, 128.6, 127.8, 127.4, 127.2, 126.9, 120.1.

FTIR (neat)  $\text{cm}^{-1}$ : 3053 (w), 2918 (w), 2849 (w), 1915 (w), 1618 (w), 1582 (w), 1553 (s), 1500 (w), 1491 (w), 1441 (m), 1381 (m), 1353 (m), 1319 (m).

HRMS (ESI): calc'd for  $\text{C}_{15}\text{H}_{12}\text{N}$   $[\text{M}+\text{H}]^+$ : 206.0970, found: 206.0959.

TLC (20% EtOAc in hexanes),  $R_f$ : 0.48 (UV).

<sup>14</sup> For a prior report on the synthesis of **38**, see the SI in Larivée, A.; Mousseau, J. J.; Charette, A. B. *J. Am. Chem. Soc.* **2008**, *130*, 52–54.

Pulse Sequence: s2pul  
 Solvent: CDCl3  
 Ambient temperature  
 INOVA-500 "buttwinkle"  
 Relax. delay 5.000 sec  
 Pulse 89.0 degrees  
 Acq. time 3.001 sec  
 Width 10504.2 Hz  
 s repetitions  
 OBSERVE H1, 499.7446545 MHZ  
 DATA PROCESSING  
 FT size 131072  
 Total time 2 min, 8 sec

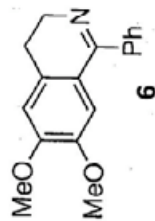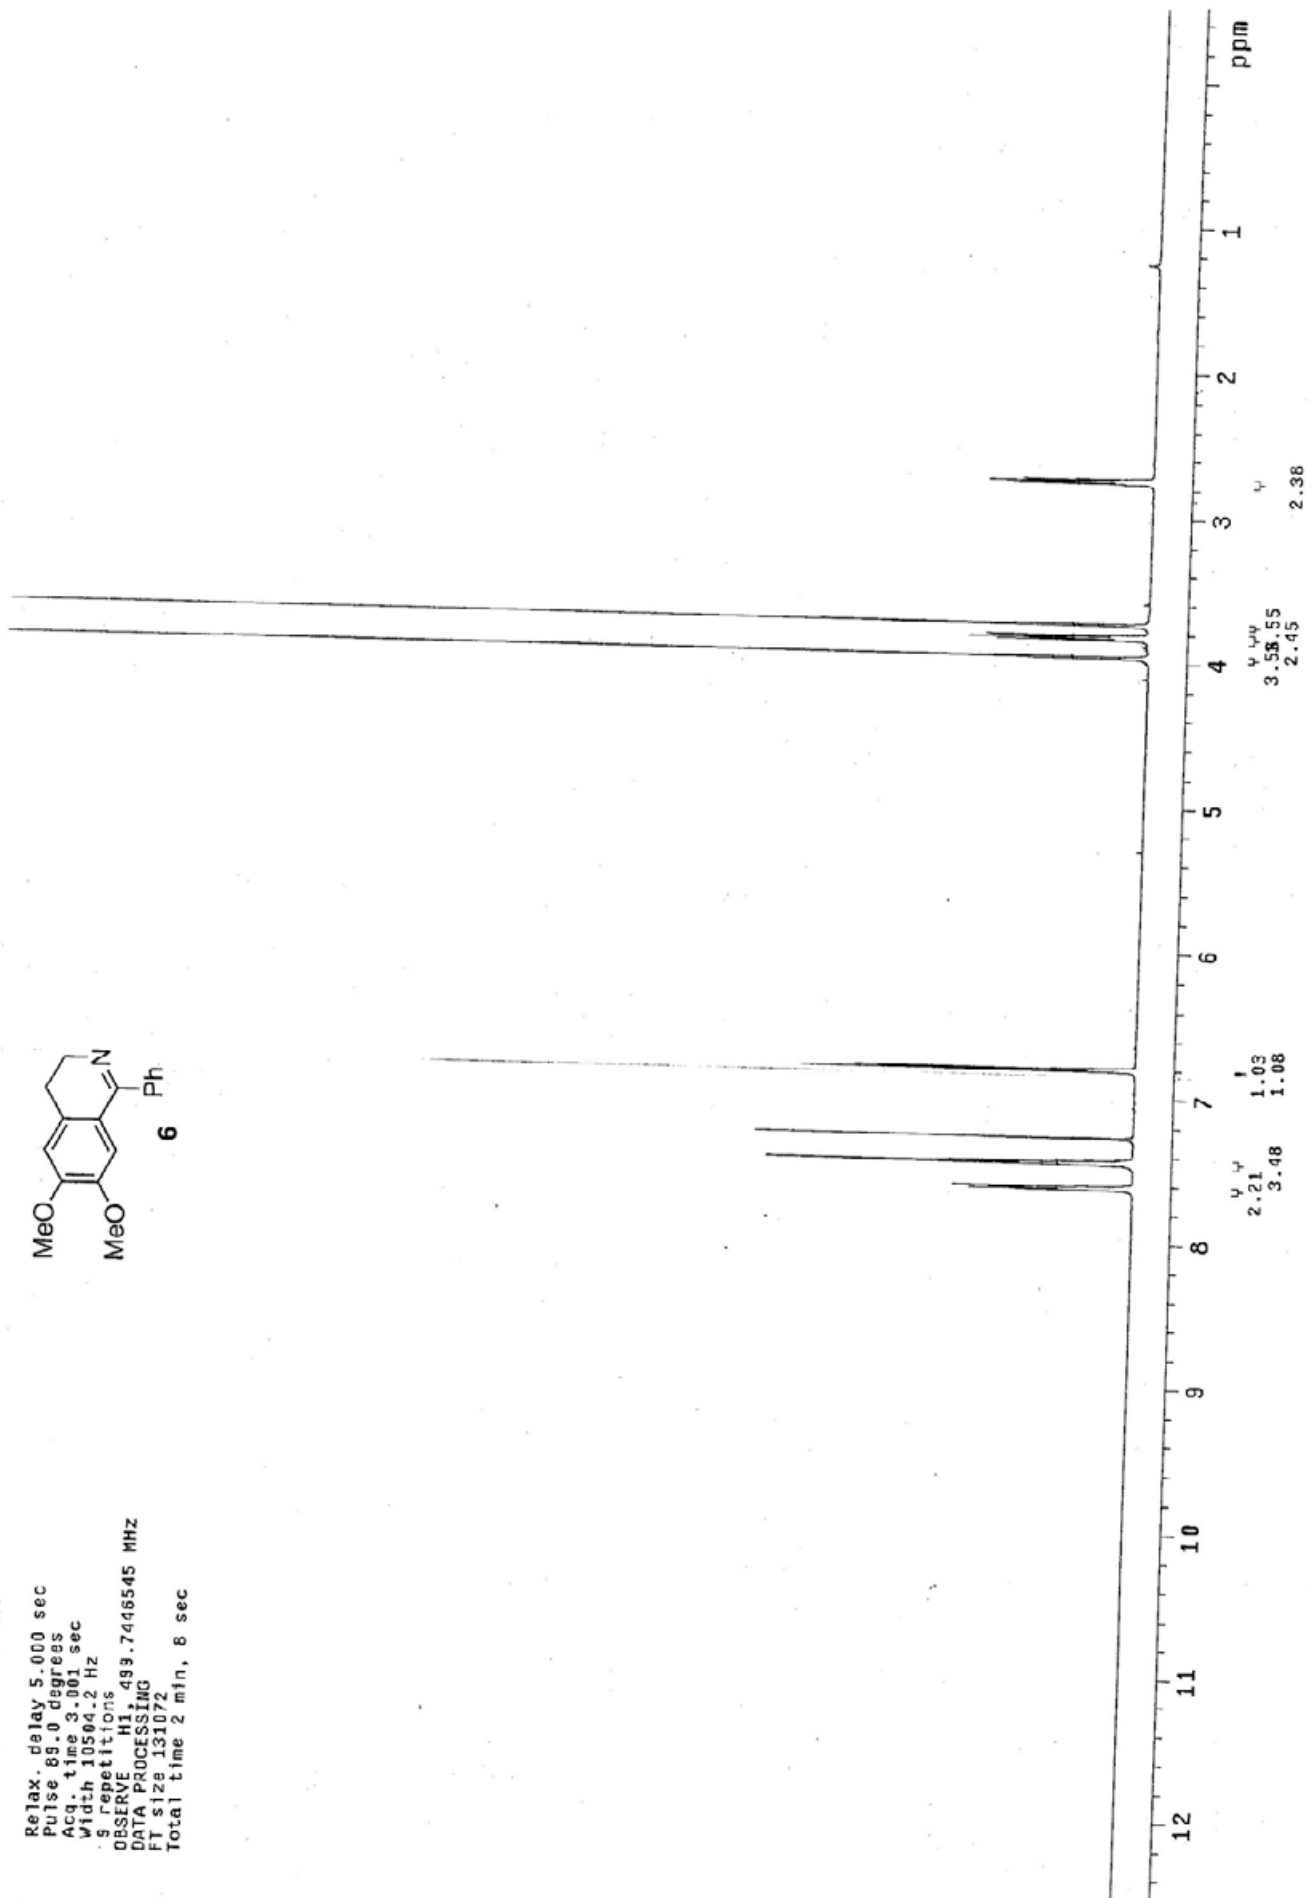

Pulse Sequence: s2pul

Solvent: CDCl3

Ambient temperature

User: i-14-87

File: mh-iv-187carbon

INOVA-500 "zippy"

PULSE SEQUENCE

Relax. delay 0.763 sec

Pulse 65.4 degrees

Acq. time 1.736 sec

Width 37735.8 Hz

256 repetitions

OBSERVE C13, 125.7832337 MHz

DECOUPLE H1, 500.2322753 MHz

Power 37 dB, 500.2322753 MHz

continuously on

WALTZ-16 modulated

DATA PROCESSING

Line broadening 0.3 Hz

FT size 131072

Total time 10 min, 44 sec

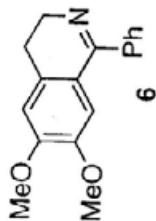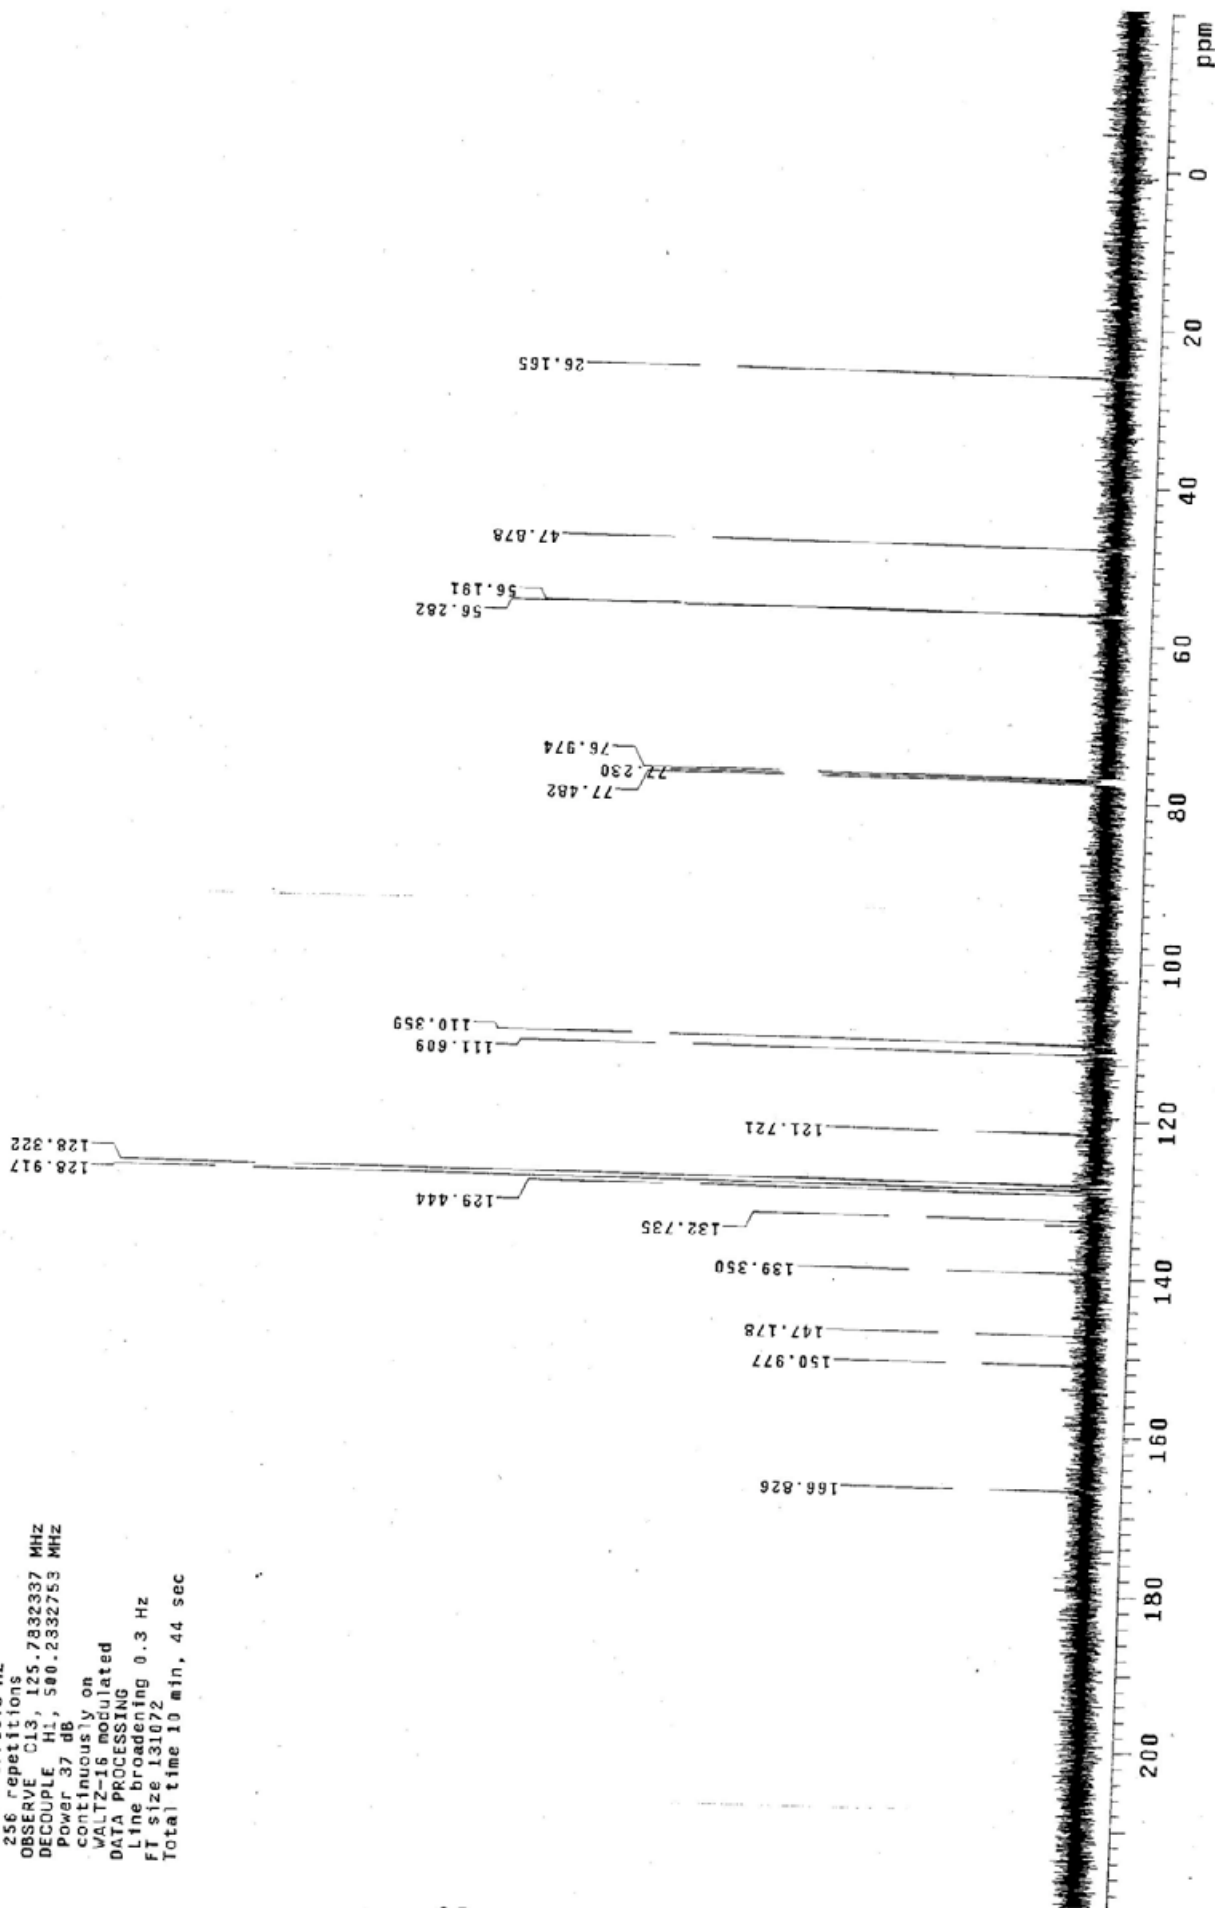

Pulse Sequence: s2pul  
 Solvent: CDCl3  
 Ambient temperature  
 File: mh-IV-208fr3-10  
 INOVA-500 "zippy"  
 PULSE SEQUENCE  
 Relax. delay 5.000 sec  
 Pulse 89.0 degrees  
 Acq. time 3.001 sec  
 Width 10504.2 Hz  
 3 repetitions  
 OBSERVE H1, 499.7446548 MHz  
 DATA PROCESSING  
 FT size 131072  
 Total time 2 min, 8 sec

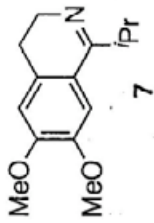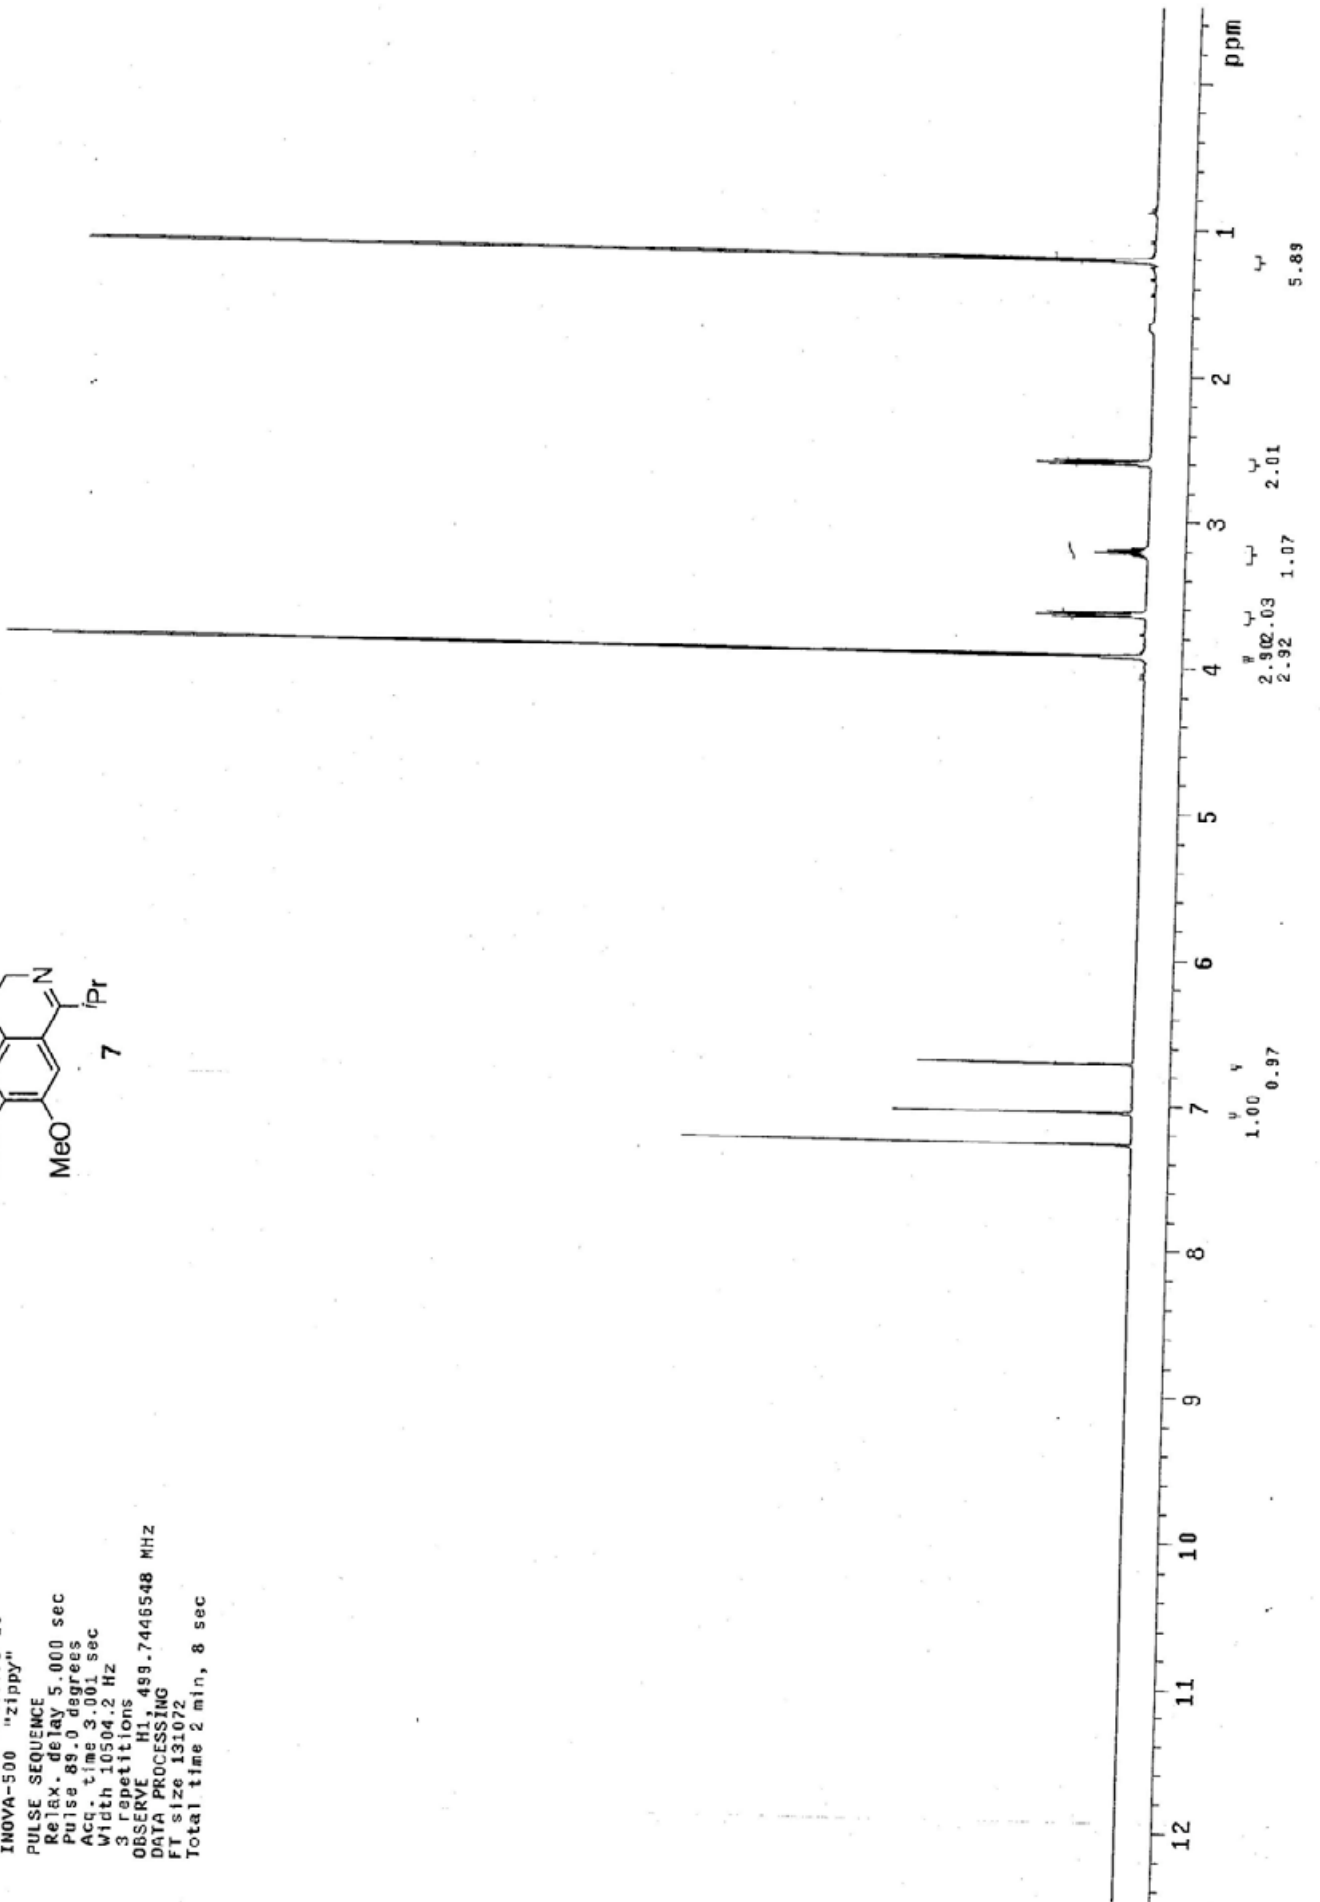

Solvent: CDCl3  
 Ambient temperature  
 User: 1-14-87  
 INOVA-500 "rocky"  
 PULSE SEQUENCE  
 Relax. delay 0.763 sec  
 Pulse 65.4 degrees  
 Acq. time 1.736 sec  
 Width 37735.8 Hz  
 96 repetitions  
 OBSERVE C13, 125.7832291 MHz  
 DECOUPLE H1, 500.2332753 MHz  
 Power 37 dB  
 continuously on  
 VALT2-16 modulated  
 DATA PROCESSING  
 Line broadening 0.3 Hz  
 FT size 131072  
 Total time 4 minutes

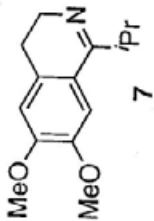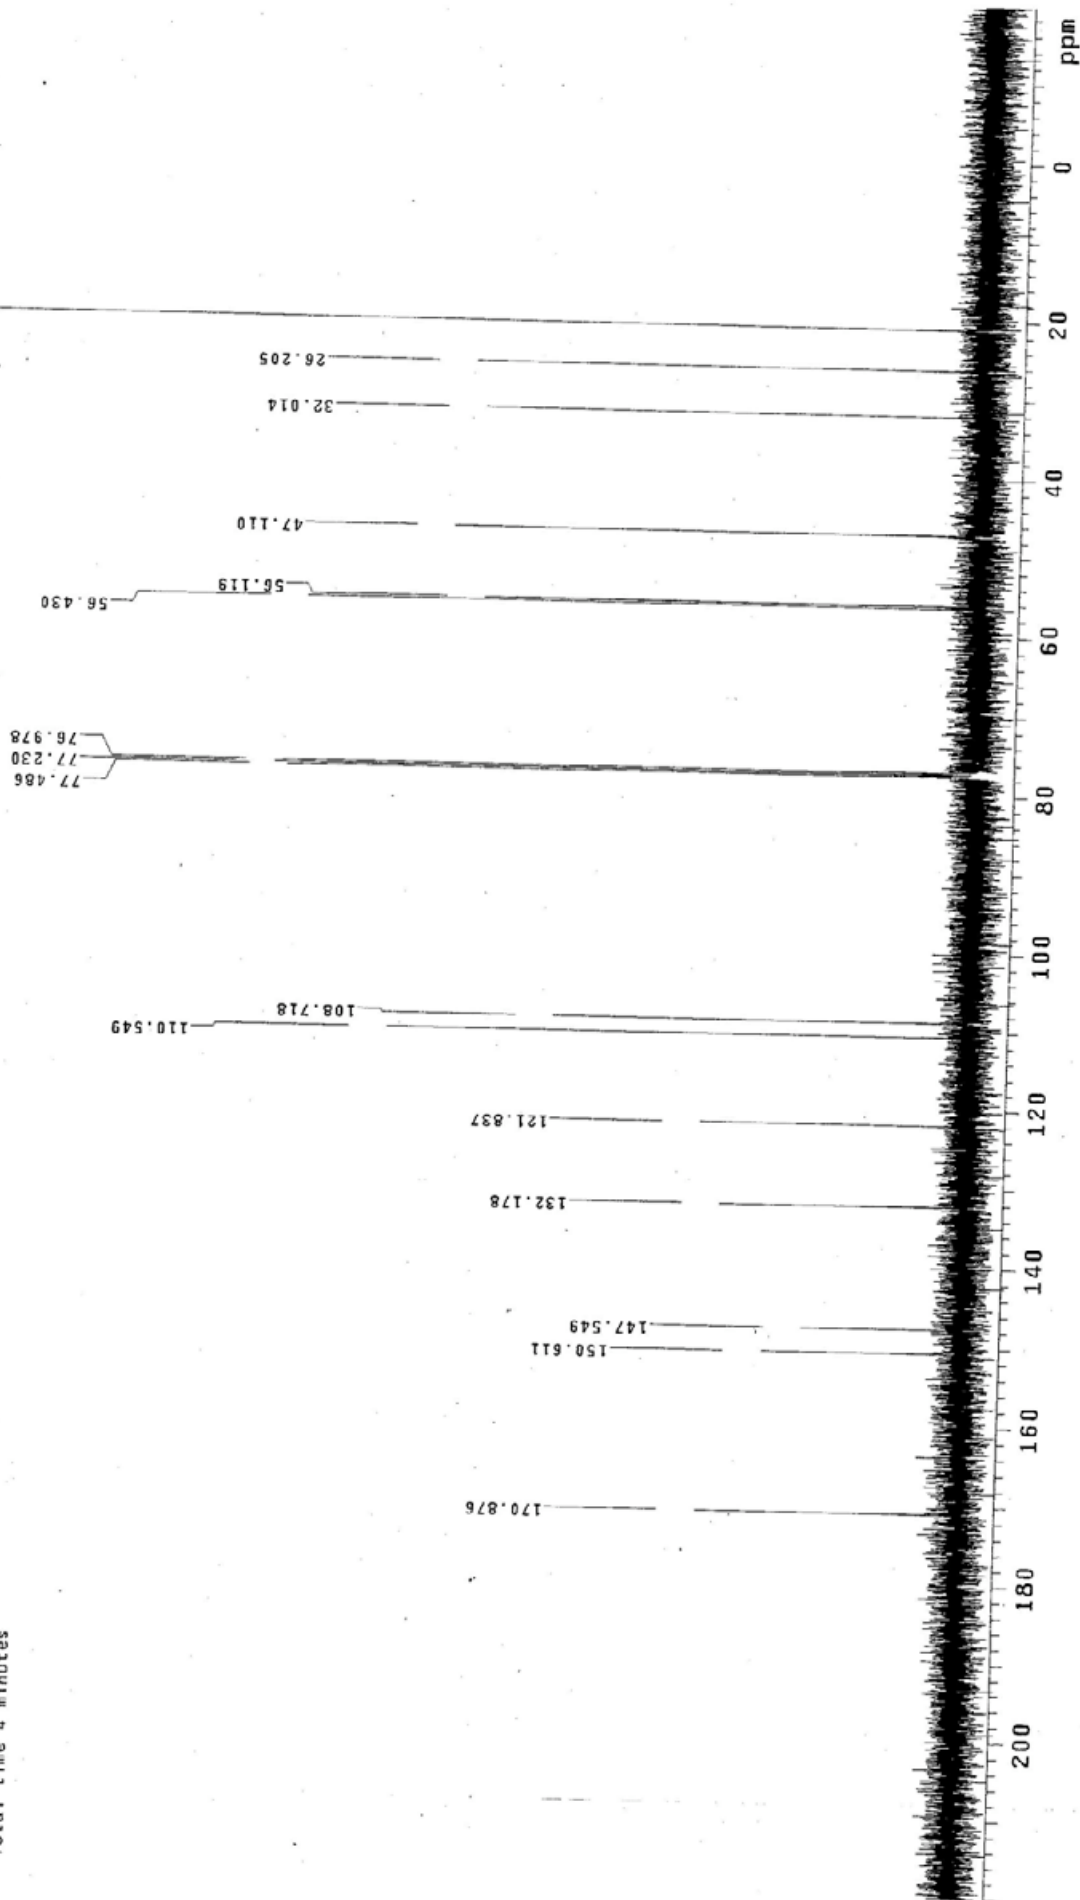

Pulse Sequence: s2pu  
 Solvent: CDCl3  
 Ambient temperature  
 File: mh-VIII-28  
 INOVA-500 "Casper"

Relax. delay 5.000 sec  
 Pulse 78.7 degrees  
 Acq. time 4.559 sec  
 Width 12012.0 Hz  
 4 repetitions  
 OBSERVE H1, 500.4294975 MHz  
 DATA PROCESSING  
 FT size 262144  
 Total time 2 min, 40 sec

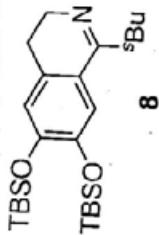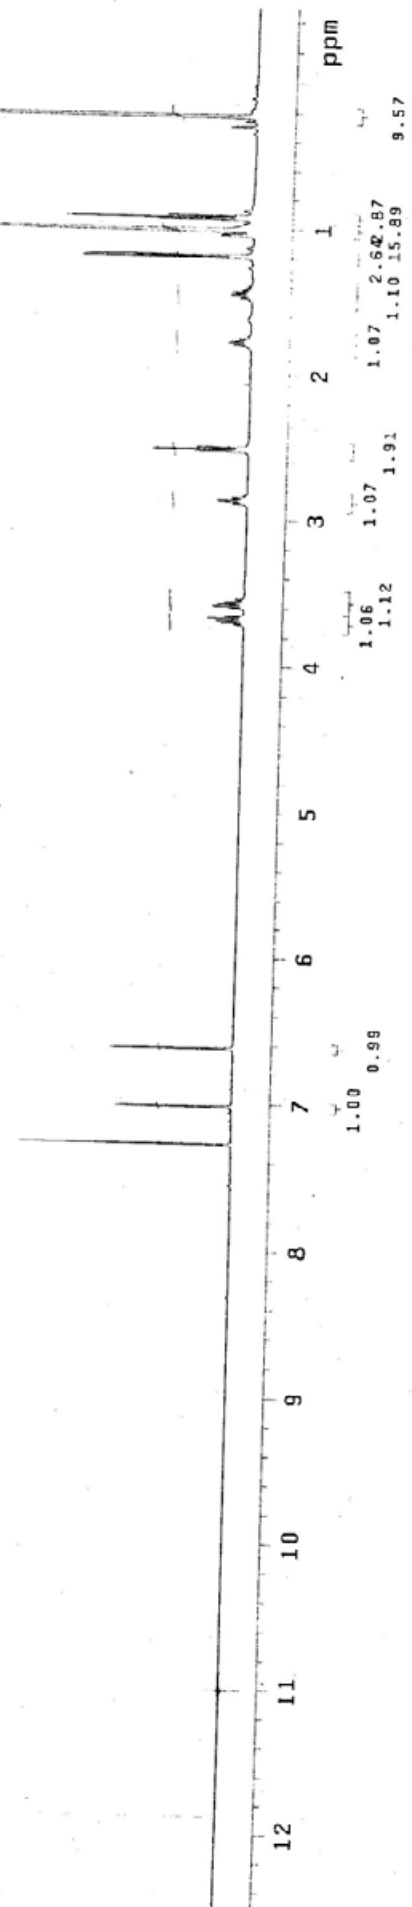

Solvent: CDCl3  
 Ambient temperature  
 User: 1-14-87  
 INOVA-500 "rocky"

PULSE SEQUENCE

Relax. delay 0.763 sec  
 Pulse 69.0 degrees  
 Acq. time 1.736 sec  
 Width 37735.8 Hz  
 100000 repetitions  
 OBSERVE C13, 125.7822125 MHz  
 DECOUPLE H1, 500.2292208 MHz  
 power 37 dB  
 continuously on  
 WALTZ-16 modulated  
 DATA PROCESSING  
 Line broadening 0.3 Hz  
 FT size 131072  
 Total time 694.2 hours

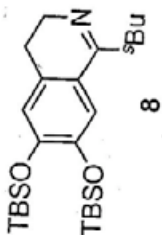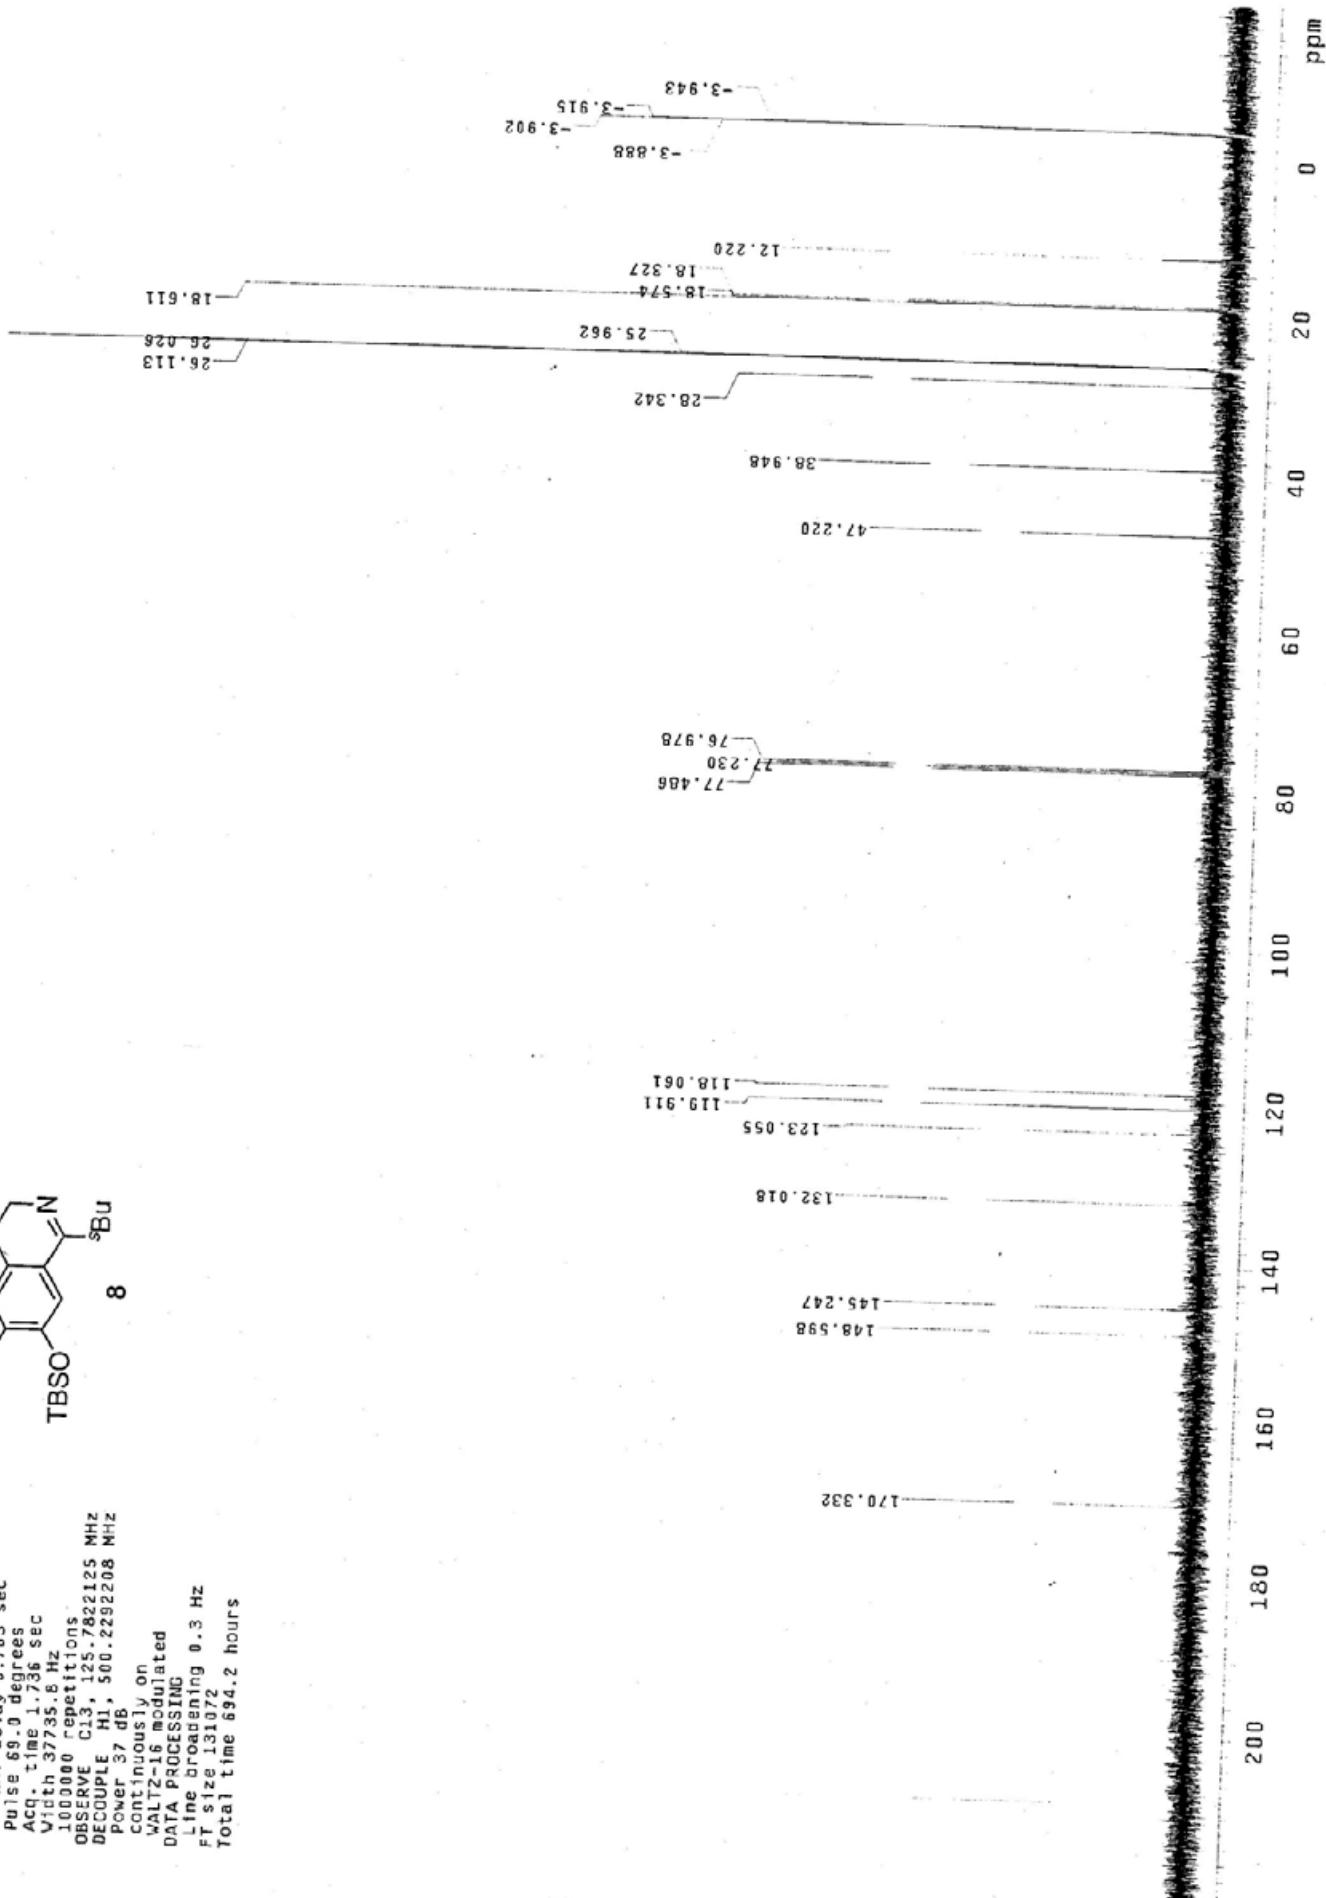





Solvent: CDCl3  
 Ambient temperature  
 User: i-14-87  
 INOVA-500 "rocky"  
 PULSE SEQUENCE  
 Relax. delay 0.763 sec  
 Pulse 99.0 degrees  
 Acq. time 1.735 sec  
 Width 37735.8 Hz  
 100000000 repetitions  
 OBSERVE C13, 125.7832325 MHz  
 DECOUPLE H1, 500.2332753 MHz  
 Power 37 dB  
 continuously on  
 WALTZ-16 modulated  
 DATA PROCESSING  
 Line broadening 0.3 Hz  
 FT size 131072  
 Total time 69421.6 hours

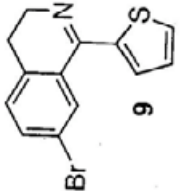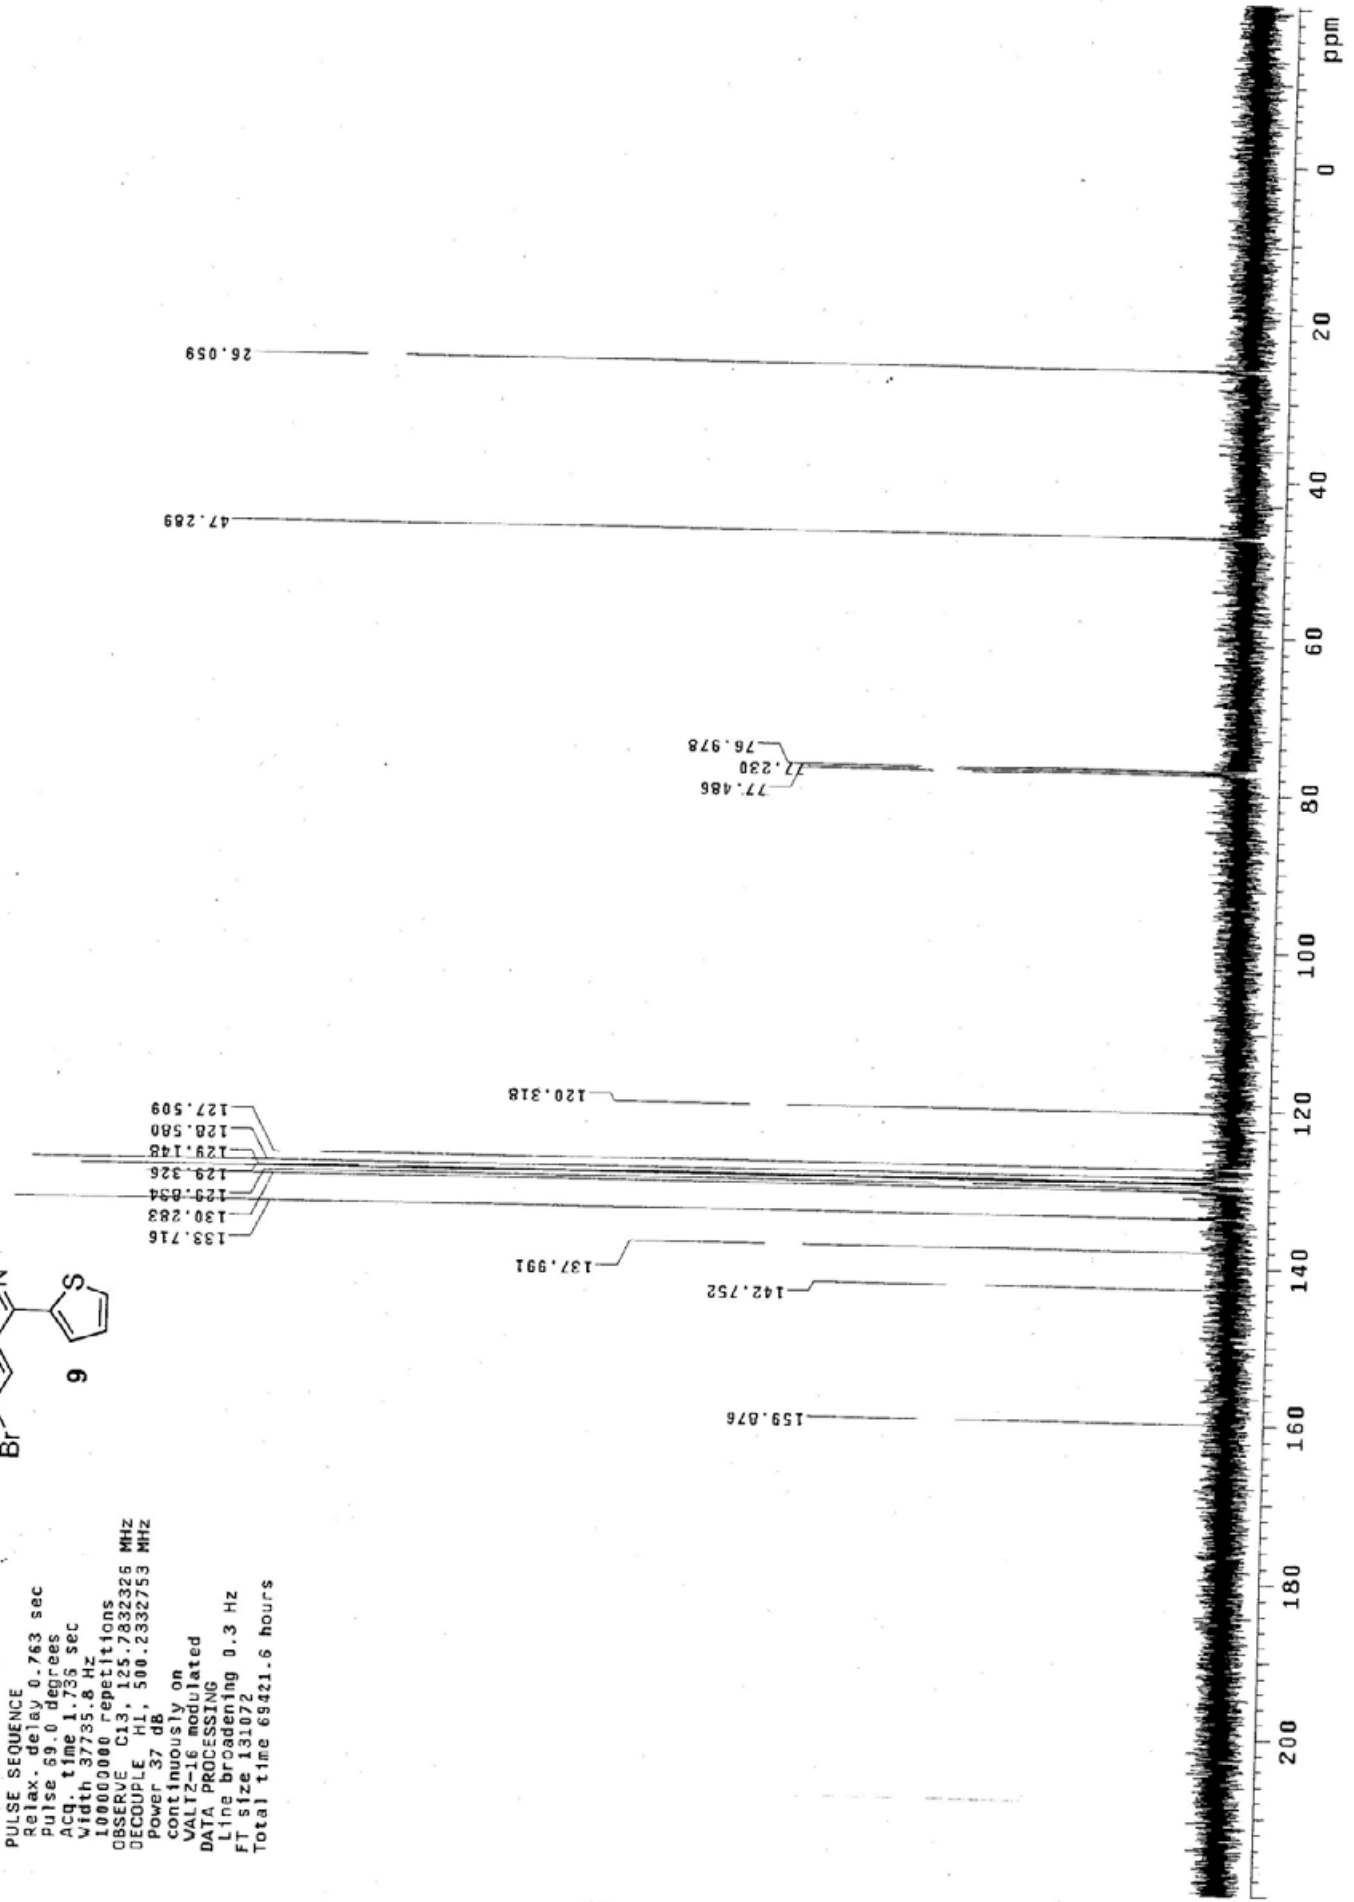

Pulse Sequence: s2pu1  
Solvent: CDC13  
Ambient temperature  
INNOVA-500 "but1wink1e"

Relax. delay 5.000 sec  
Pulse 94.4 degrees  
Acq. time 3.001 sec  
Width 10504.2 Hz  
5 repetitions  
OBSERVE H1, 499.7417205 MHZ  
DATA PROCESSING  
FT size 262144  
Total time 2 min, 8 sec

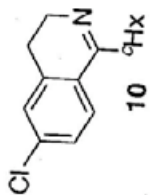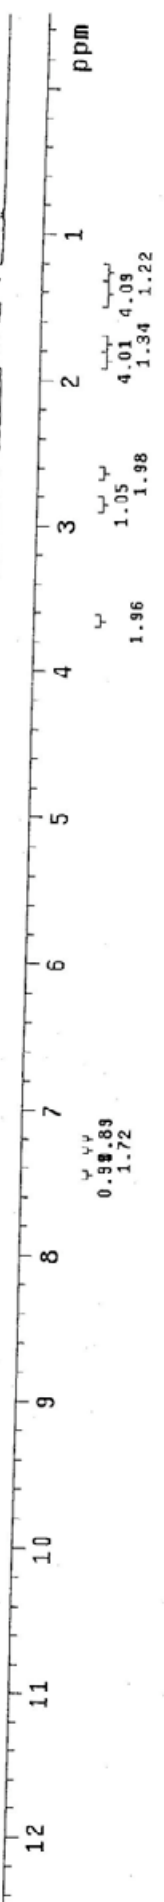

Solvent: CDCl<sub>3</sub>  
 Ambient temperature  
 User: 1-14-87  
 INOVA-500 "rocky"  
 PULSE SEQUENCE  
 Relax. delay 0.763 sec  
 Pulse 59.0 degrees  
 Acq. time 1.736 sec  
 Width 37735.8 Hz  
 80 repetitions  
 OBSERVE C13, 125.2822125 MHz  
 DECOUPLE H1, 500.2292208 MHz  
 Power 37 dB  
 continuously on  
 WALTZ-16 modulated  
 DATA PROCESSING  
 Line broadening 0.3 Hz  
 FT size 131072  
 Total time 3 minutes

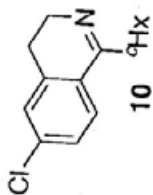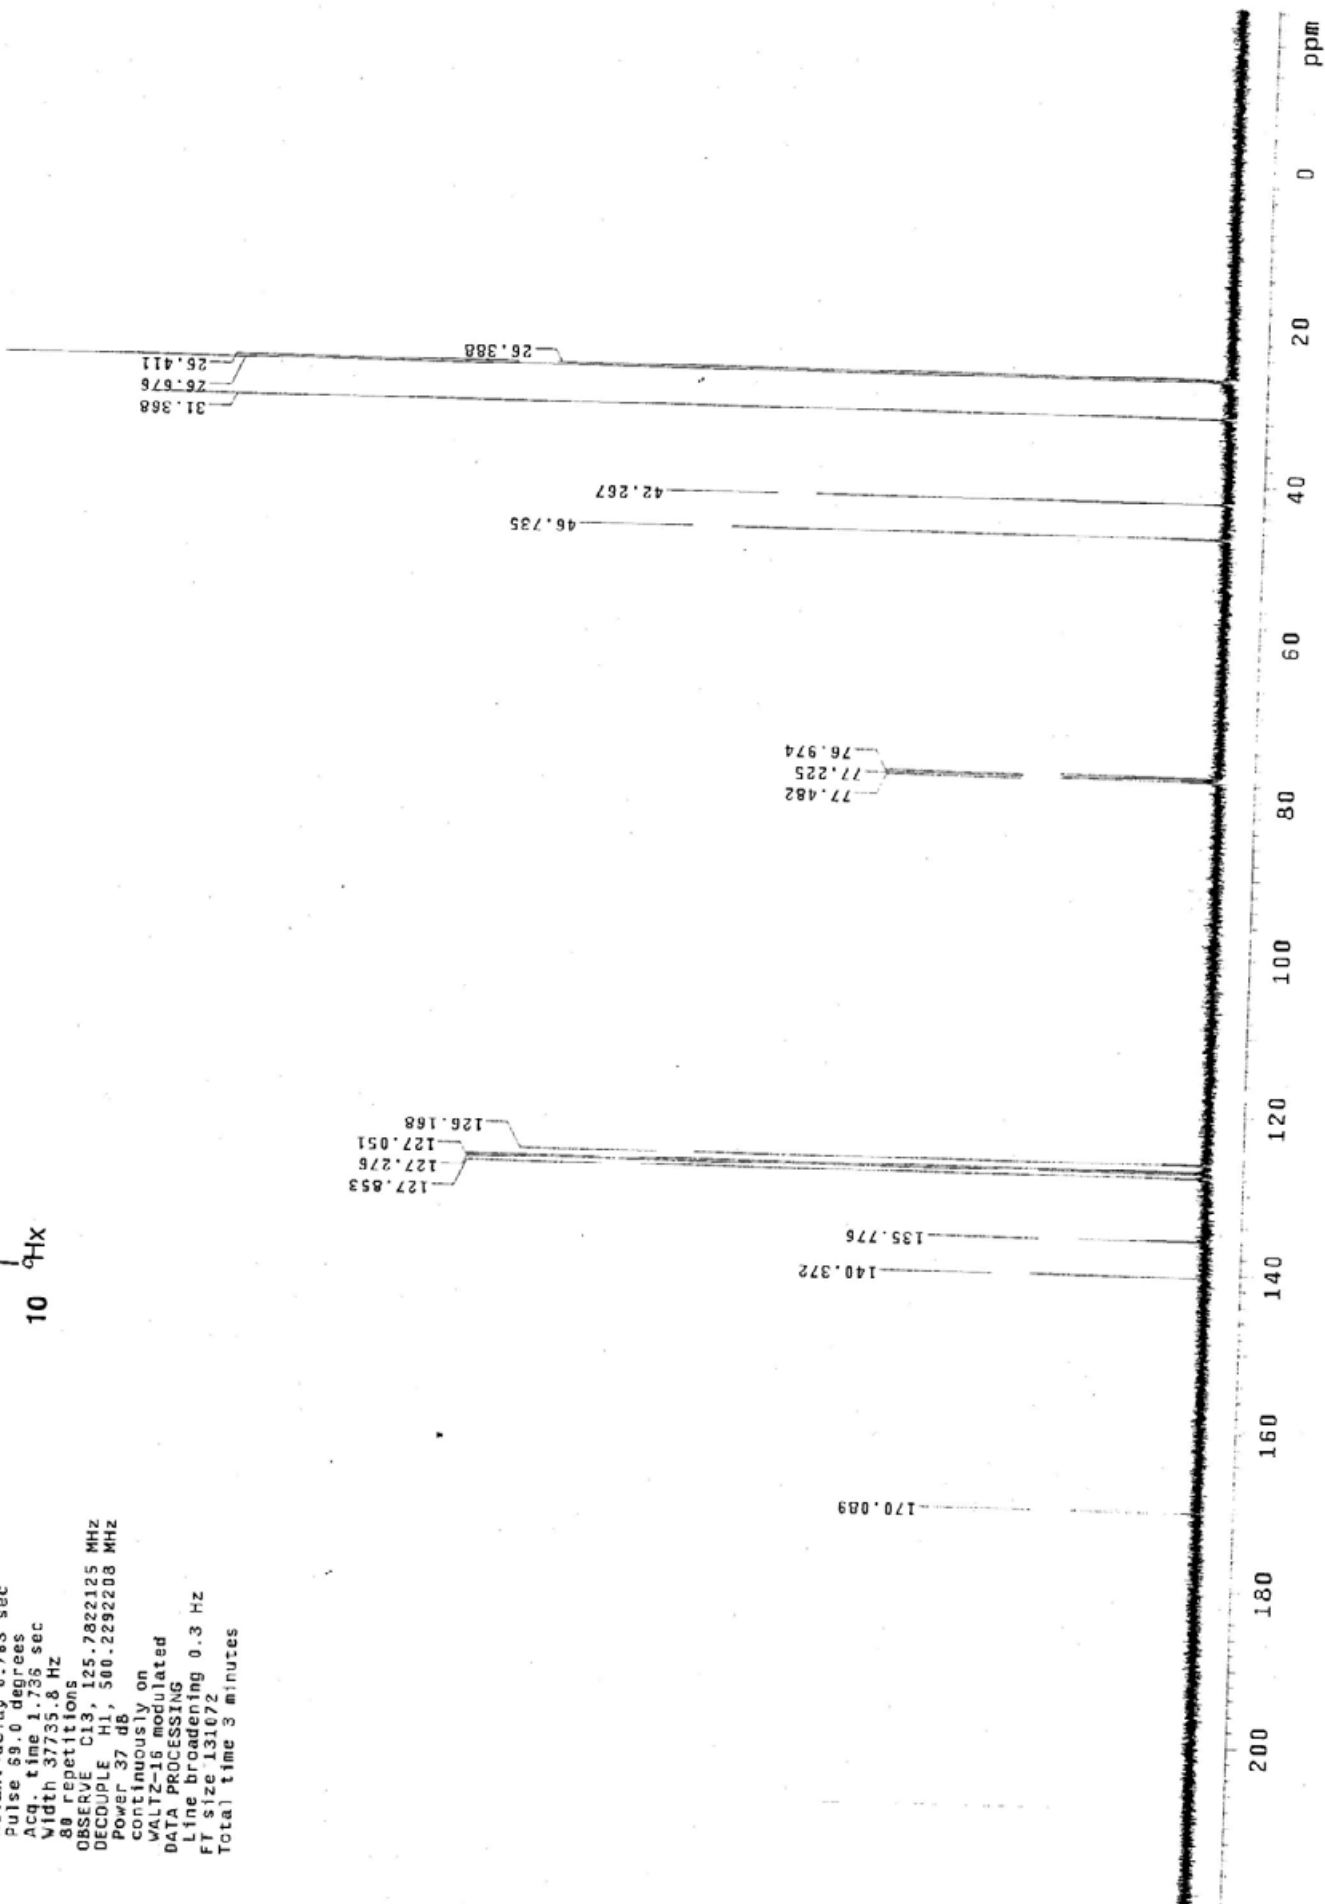

Pulse Sequence: s2pu1  
Solvent: CDCl3  
Ambient temperature  
INOVA-500 "casper"

Relax. delay 5.000 sec  
Pulse 78.7 degrees  
Acq. time 4.999 sec  
Width 12012.0 Hz  
4 repetitions  
OBSERVE HI 500.4294975 MHz  
DATA PROCESSING  
F1 size 262144  
Total time 2 min, 40 sec

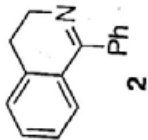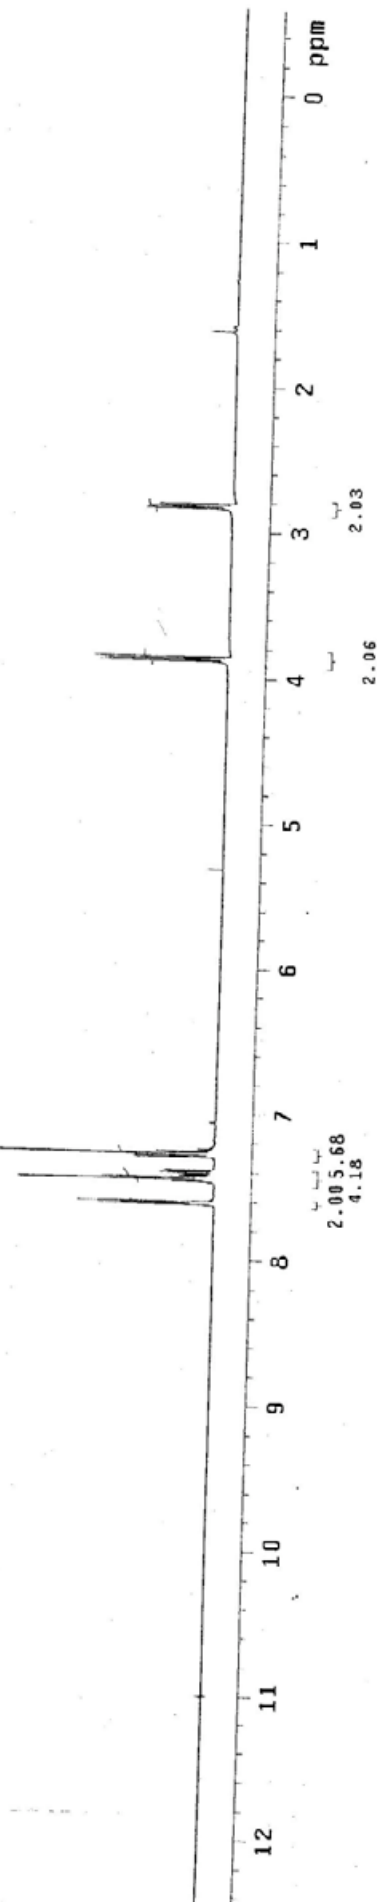

Pulse Sequence: s2pu1  
Solvent: DMSO  
Ambient temperature  
User: 1-14-87  
INOVA-500 "butlwink1e"

Relax. delay 1.000 sec  
Pulse 71.2 degrees  
Acq. time 2.000 sec  
Width 31397.2 Hz  
64 repetitions  
OBSERVE C13, 125.6508077 MHZ  
DECOUPLE H1, 499.7485932 MHZ  
Power 41 dB, 499.7485932 MHZ  
continuously on  
WALTZ-16 modulated  
DATA PROCESSING  
Line broadening 1.0 Hz  
FI size 131072  
Total time 635 hr, 48 min, 15 sec

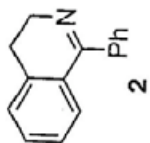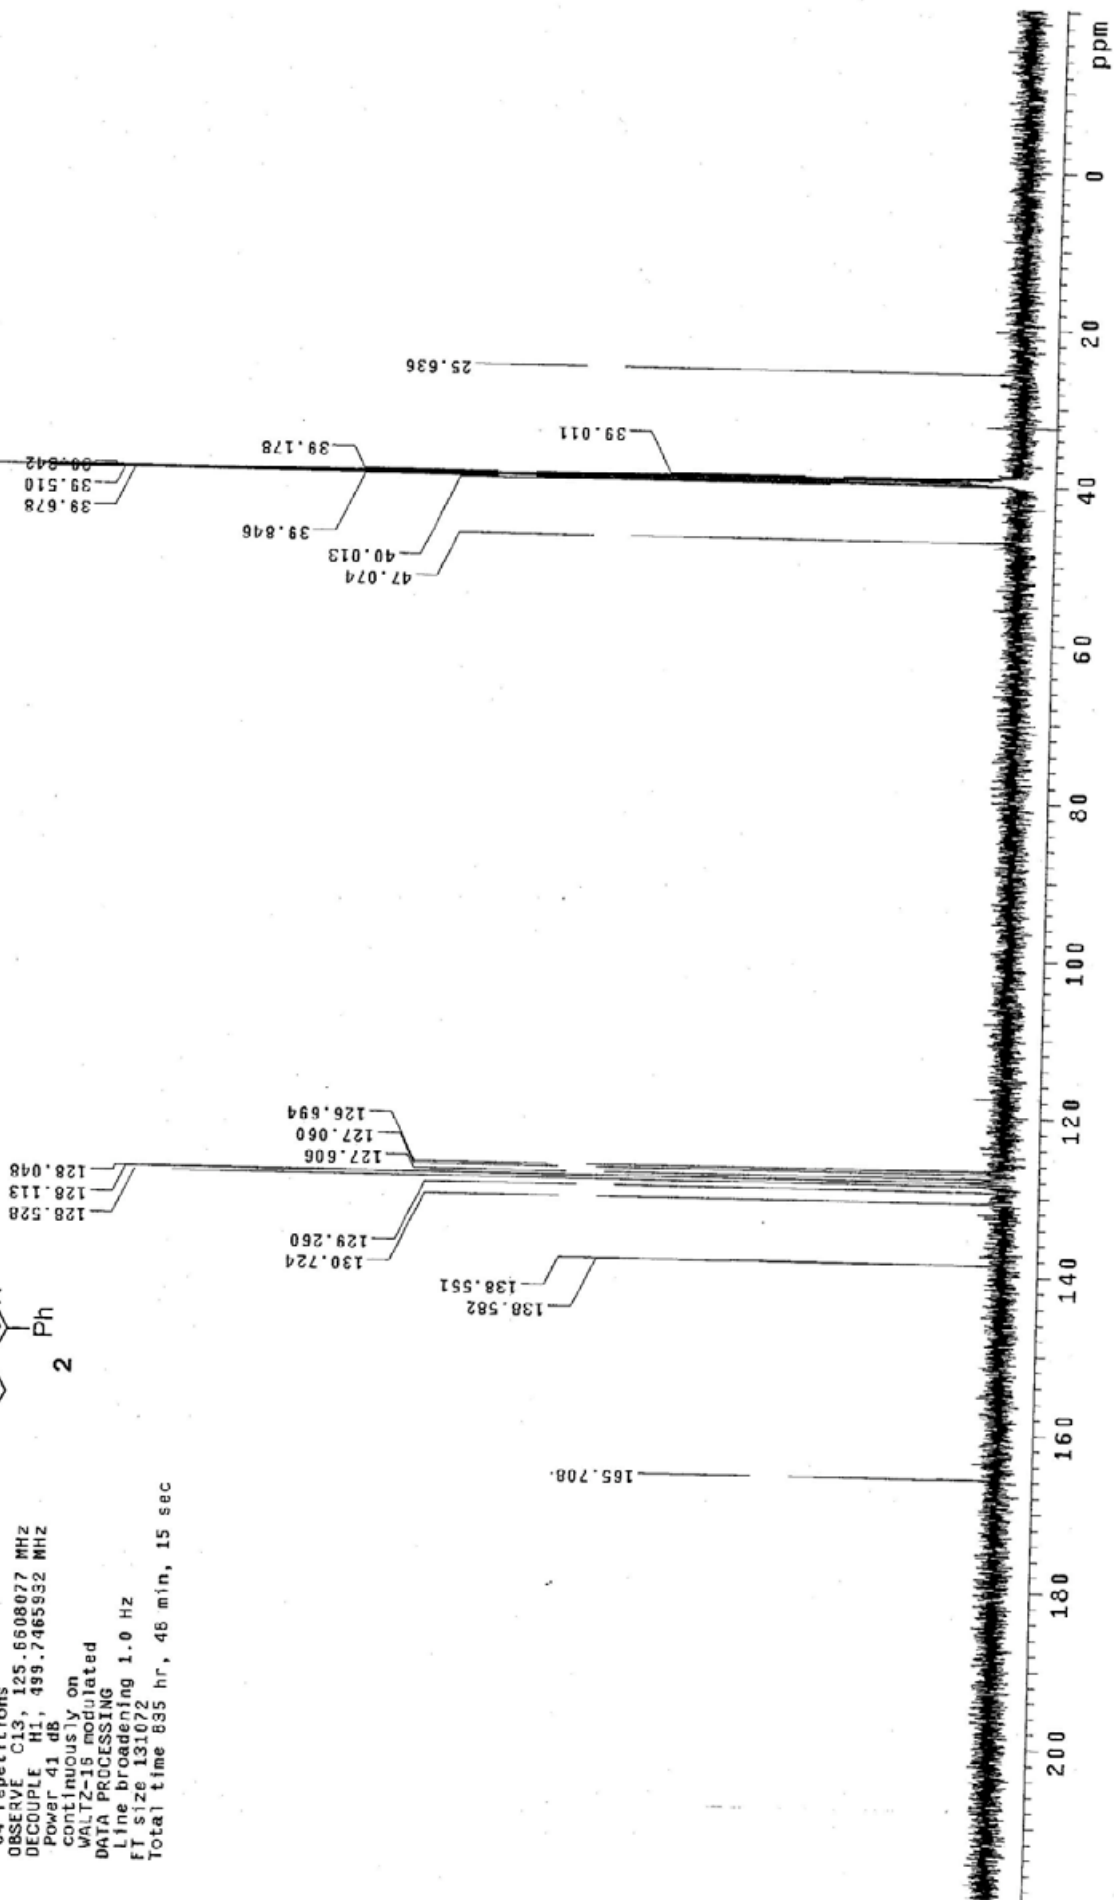

Pulse Sequence: s2pul  
 Solvent: CDCl<sub>3</sub>  
 Ambient temperature  
 INOVA-500 "buttwinkle"  
 Relax. delay 2.000 sec  
 Pulse 94.4 degrees  
 Acq. time 3.001 sec  
 Width 10504.2 Hz  
 13 repetitions  
 OBSERVE H1 499.7417206 MHz  
 DATA PROCESSING  
 FT size 262144  
 Total time 1 min, 20 sec

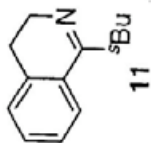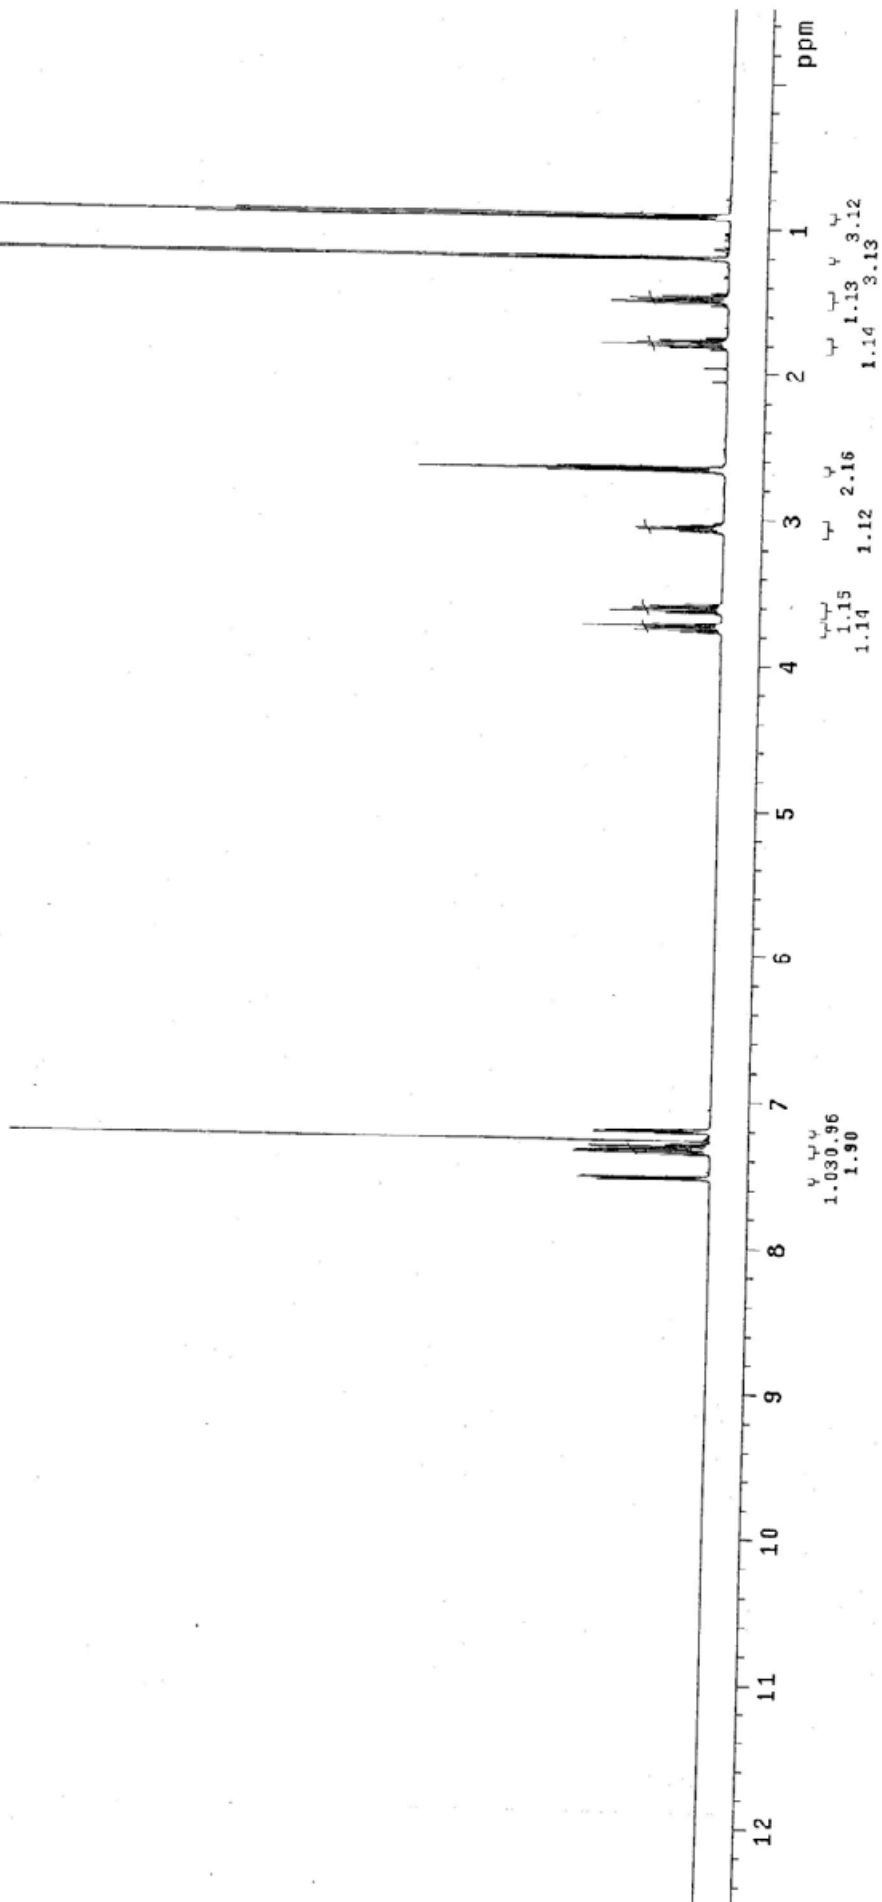

Solvent: CDCl<sub>3</sub>  
 Ambient temperature  
 User: 1-14-87  
 INOVA-500 "rocky"  
 PULSE SEQUENCE  
 Relax. delay 0.763 sec  
 Pulse 69.0 degrees  
 Acq. time 1.736 sec  
 Width 37735.8 Hz  
 64 repetitions  
 OBSERVE C13, 125.7822131 MHZ  
 DECOUPLE H1, 500.2292208 MHZ  
 power 37 dB  
 continuously on  
 WALTZ-16 modulated  
 DATA PROCESSING  
 Line broadening 0.3 Hz  
 FT size 131072  
 Total time 2 minutes

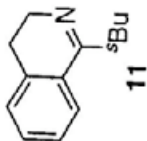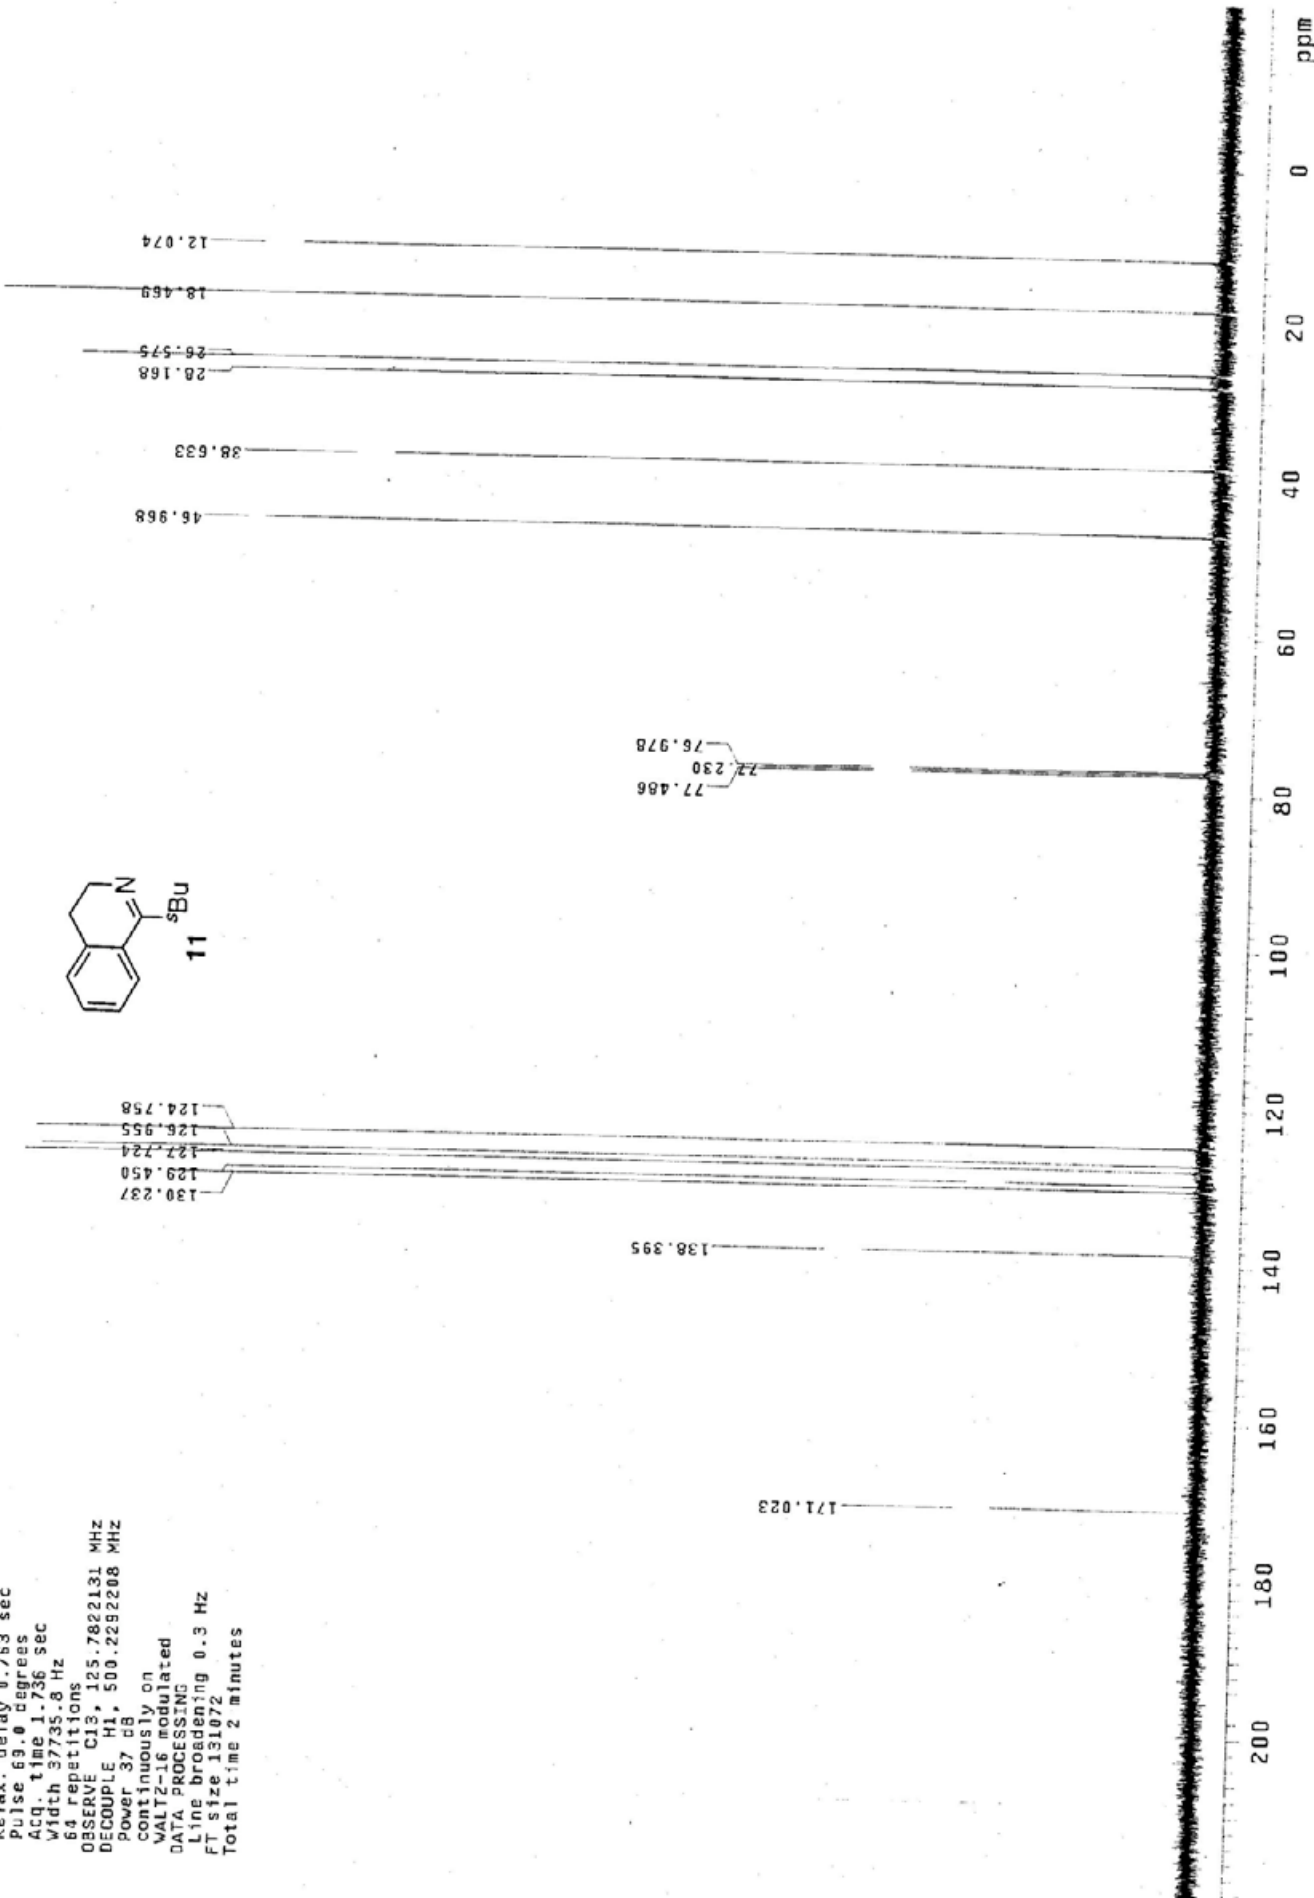

Pulse Sequence: s2pu1  
 Solvent: CDCl3  
 Temp: 22.0 C / 295.1 K  
 File: mh-VII-14  
 INOVA-500 "zippy"  
 PULSE SEQUENCE  
 Relax. delay 5.000 sec  
 Pulse 99.0 degrees  
 Acq. time 3.001 sec  
 Width 10504.2 Hz  
 16 repetitions  
 OBSERVE Hi, 499.7417206 MHz  
 DATA PROCESSING  
 FT size 262144  
 Total time 2 min, 8 sec

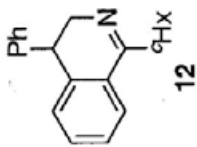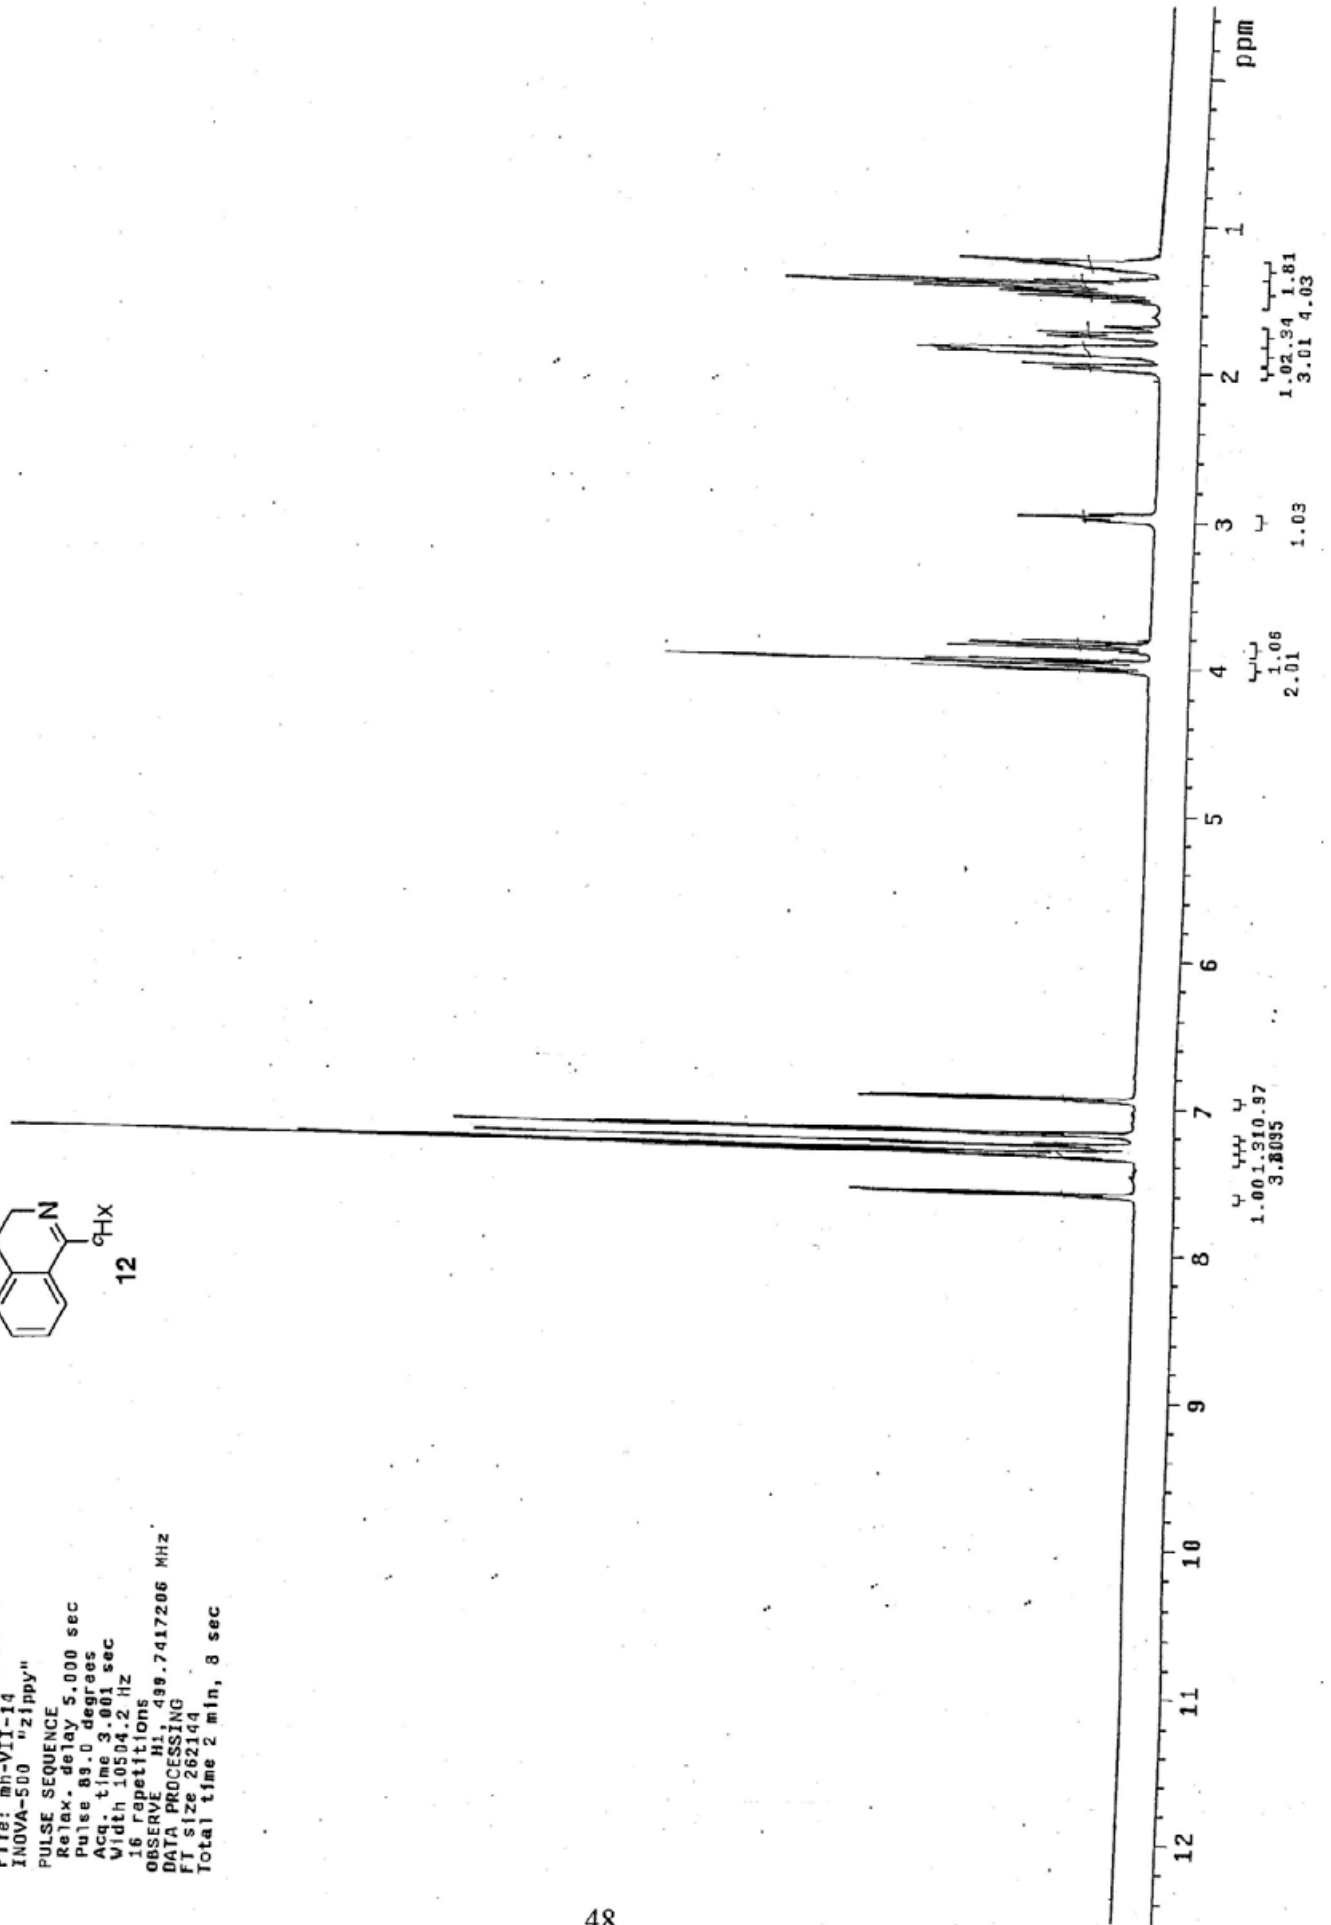



Solvent: CDCl<sub>3</sub>  
 Ambient temperature  
 User: i-14-87  
 INOVA-560 "rocky"  
 PULSE SEQUENCE  
 Relax. delay 0.753 sec  
 Pulse 69.0 degrees  
 Acq. time 1.736 sec  
 Width 37735.8 Hz  
 8 repetitions  
 OBSERVE C13, 125.7832355 MHZ  
 DECOUPLE H1, 500.2332753 MHZ  
 Power 37 dB  
 continuously on  
 WALTZ-16 modulated  
 DATA PROCESSING  
 Line broadening 0.3 Hz  
 FI size 131072  
 Total time 1 minute

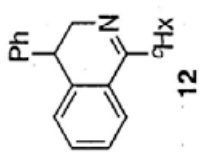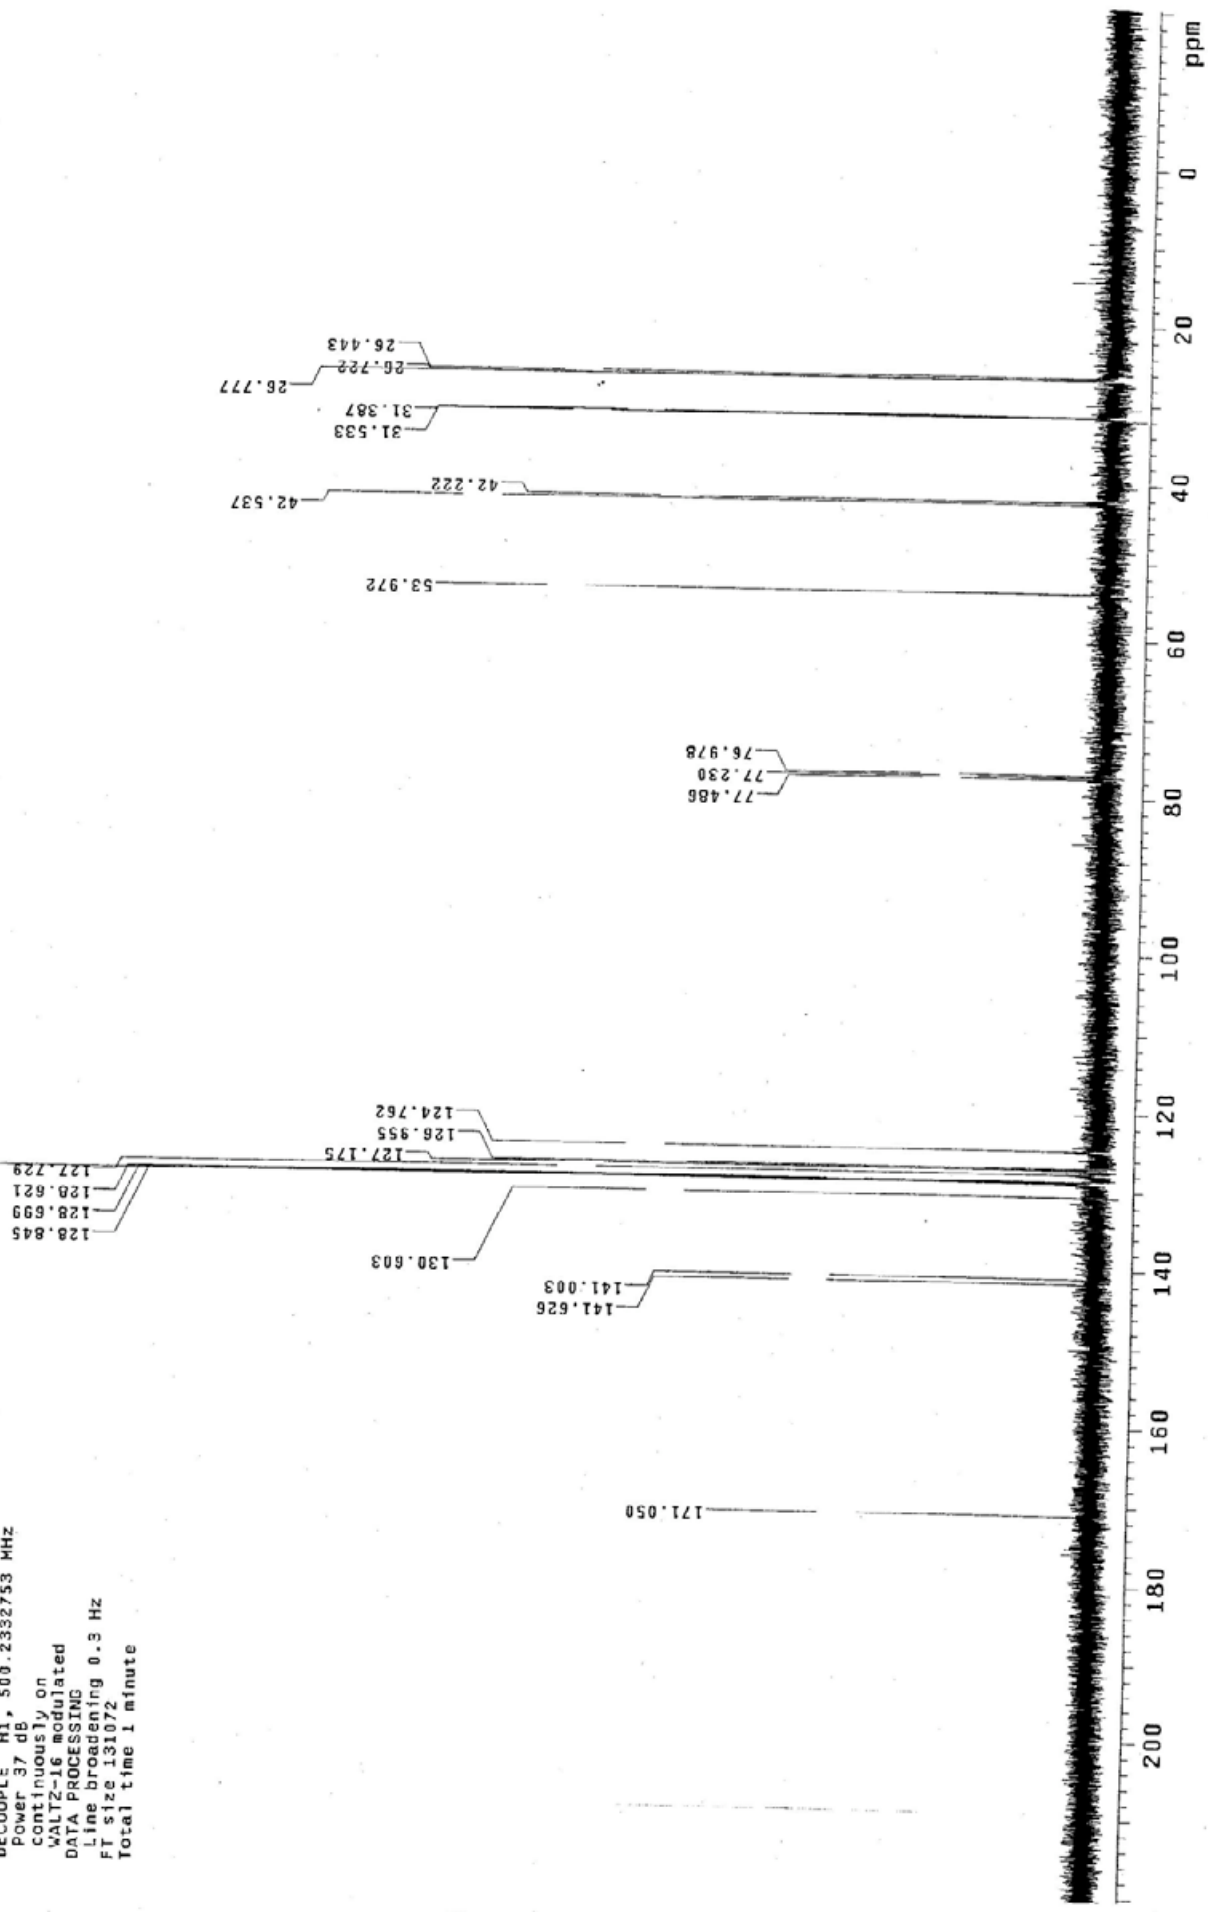

Pulse Sequence: s2pu)  
Solvent: CDCl3  
Ambient temperature  
INOVA-500 "bulwinkle"  
Relax. delay 5.000 sec  
Pulse 99.0 degrees  
Acq. time 3.001 sec  
Width 10504.2 Hz  
7 repetitions  
OBSERVE H1 430.7417206 MHz  
DATA PROCESSING  
FT size 262144  
Total time 2 min, 8 sec

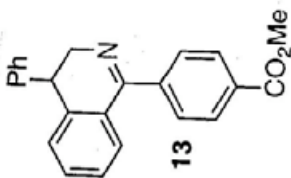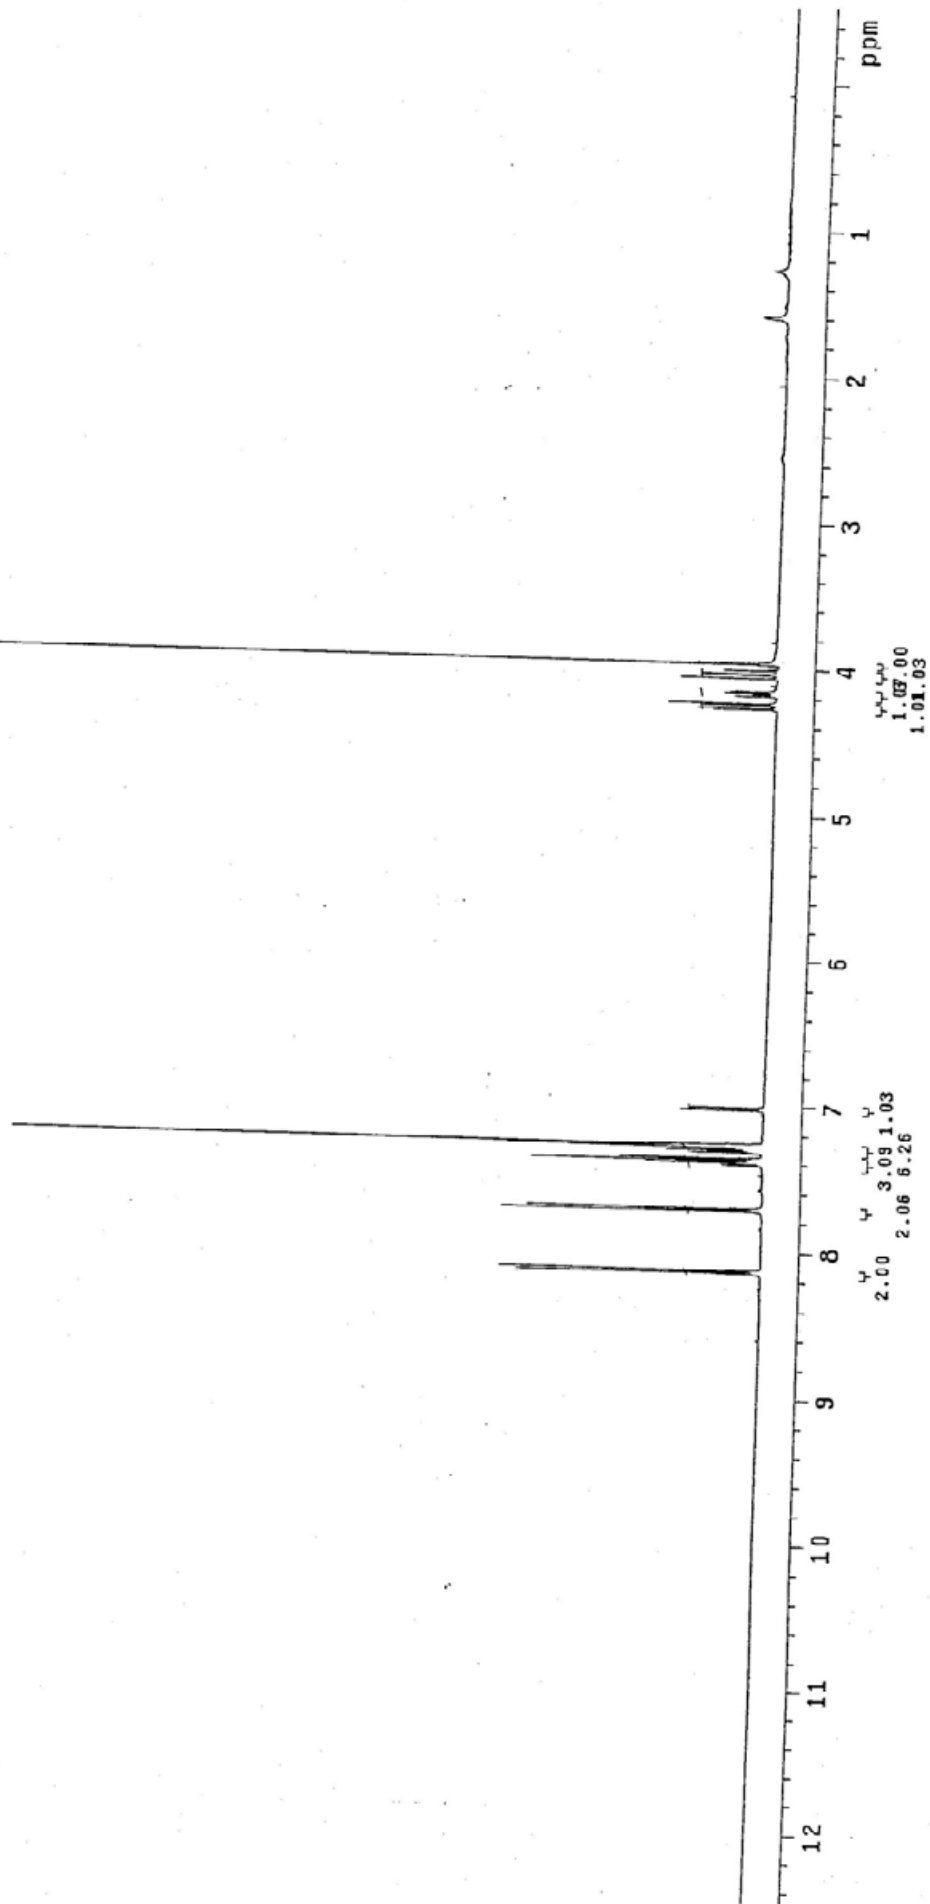

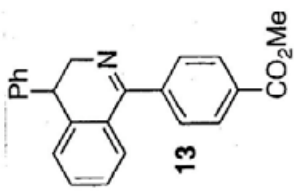

Solvent: CDCl<sub>3</sub>  
 Ambient temperature  
 User: 1-14-87  
 INOVA-500 "rocky"  
 PULSE SEQUENCE  
 Relax. delay 0.763 sec  
 Pulse 69.0 degrees  
 Acq. time 1.736 sec  
 Width 37735.8 Hz  
 136 repetitions  
 OBSERVE C13, 125.7832280 MHz  
 DECOUPLE H1, 500.2332753 MHz  
 Power 37 dB  
 Continuously on  
 VOLTZ-15 modulated  
 DATA PROCESSING  
 Line broadening 0.3 Hz  
 F1 size 131072  
 Total time 5 minutes

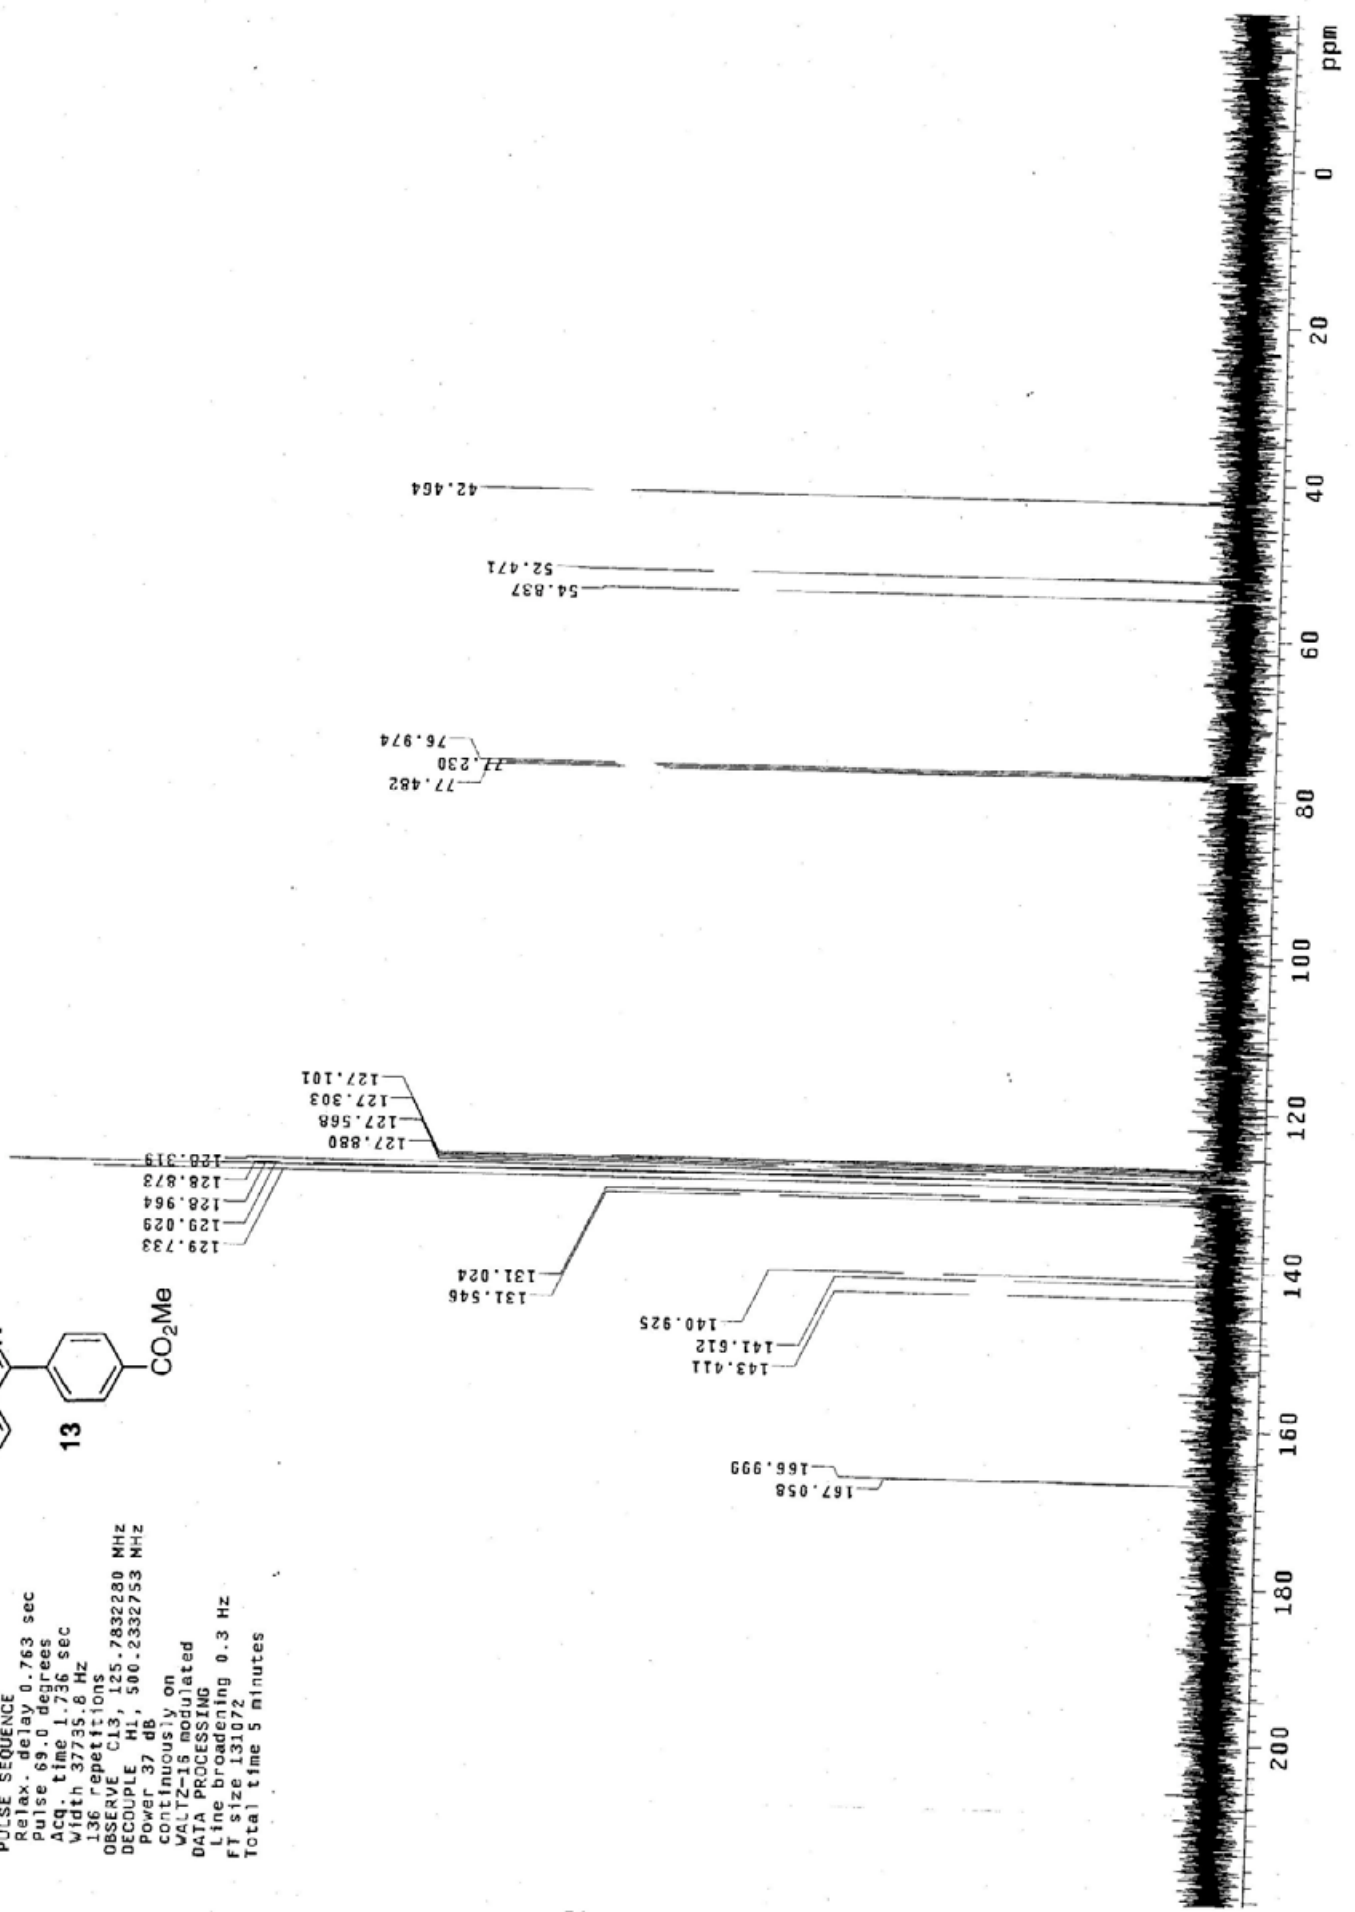



Pulse Sequence: s2pu1

Solvent: CDC13

Ambient temperature

User: 1-14-87

File: mh-VII-152

INDVA-500 "zippy"

PULSE SEQUENCE

Relax. delay 0.763 sec

Pulse 69.0 degrees

Acq. time 1.756 sec

Width 37795.8 Hz

176 repetitions

OBSERVE C13, 125.7822113 MHz

DECOUPLE H1, 500.2292208 MHz

Power 37 dB

continuously on

WALTZ-16 modulated

DATA PROCESSING

Line broadening 5.0 Hz

FT size 131072

Total time 656 hr, 41 min, 12 sec

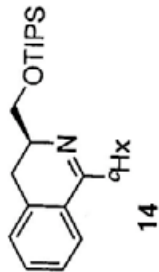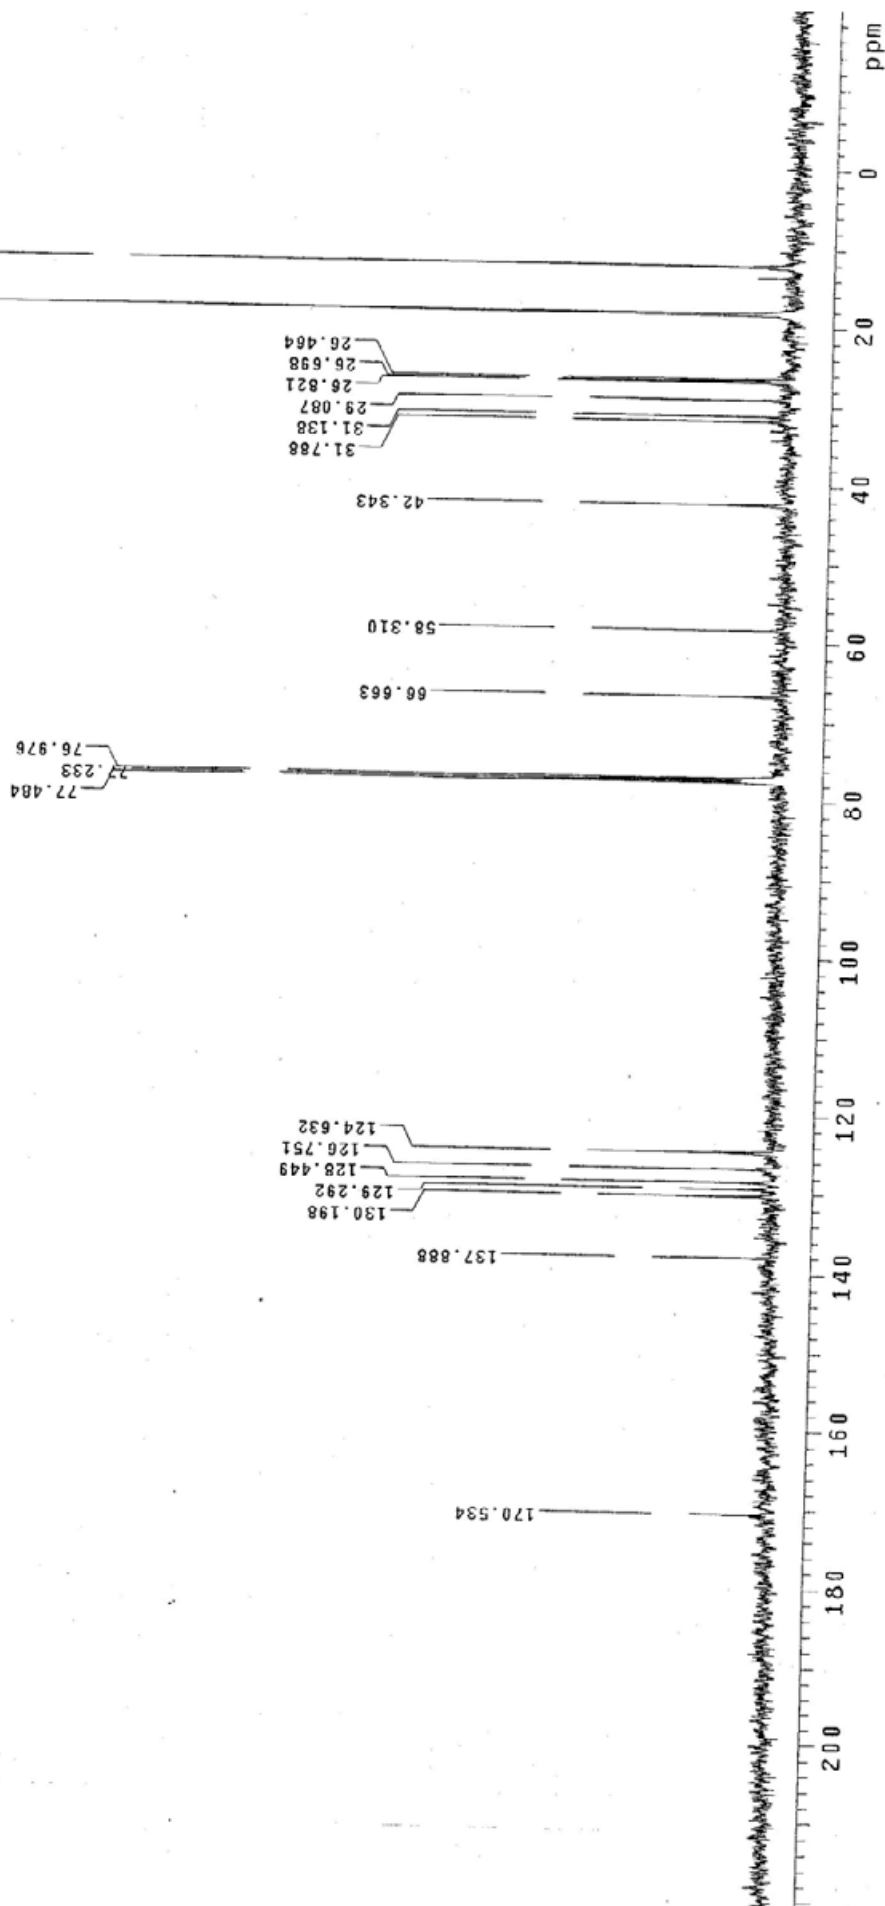

```

=====
Injection Date : 1/10/2008 4:51:15 PM      Seq. Line : 1
Sample Name    :                               Location  : Vial 20
Acq. Operator  :                               Inj      : 1
                                           Inj Volume: 1 µl

Acq. Method   : C:\HPCHEM\2\METHODS\MATT.M
Last changed  : 1/10/2008 4:50:20 PM
Analysis Method : C:\HPCHEM\2\METHODS\JUSTIN.M
Last changed  : 1/10/2008 6:04:34 PM
                (modified after loading)
=====

```

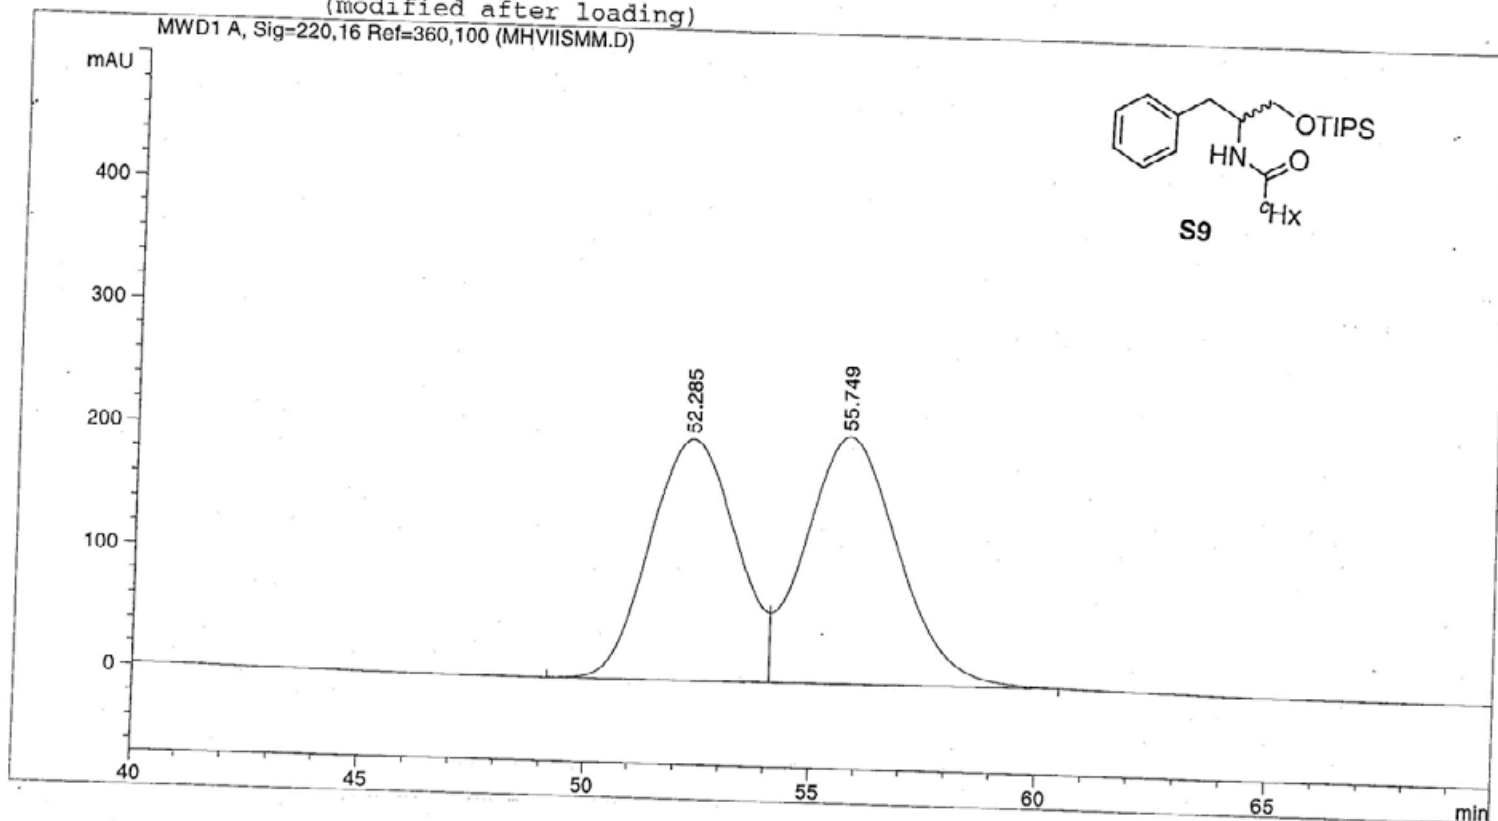

=====  
Area Percent Report  
=====

```

Sorted By      : Signal
Multiplier     : 1.0000
Dilution       : 1.0000
Use Multiplier & Dilution Factor with ISTDs

```

Signal 1: MWD1 A, Sig=220,16 Ref=360,100

| Peak #   | RetTime [min] | Type | Width [min] | Area [mAU*s] | Height [mAU] | Area %  |
|----------|---------------|------|-------------|--------------|--------------|---------|
| 1        | 52.285        | BV   | 1.8294      | 2.62919e4    | 197.72366    | 47.3324 |
| 2        | 55.749        | VB   | 1.9654      | 2.92555e4    | 202.50642    | 52.6676 |
| Totals : |               |      |             | 5.55474e4    | 400.23009    |         |

Results obtained with enhanced integrator!

=====  
\*\*\* End of Report \*\*\*

```

=====
Injection Date : 1/10/2008 6:04:48 PM      Seq. Line : 1
Sample Name    :                               Location  : Vial 18
Acq. Operator :                               Inj      : 1
                                           Inj Volume: 1 µl
Acq. Method   : C:\HPCHEM\2\METHODS\MATT.M
Last changed  : 1/10/2008 4:50:20 PM
Analysis Method : C:\HPCHEM\2\METHODS\JUSTIN.M
Last changed  : 1/10/2008 7:13:16 PM
                (modified after loading)
=====

```

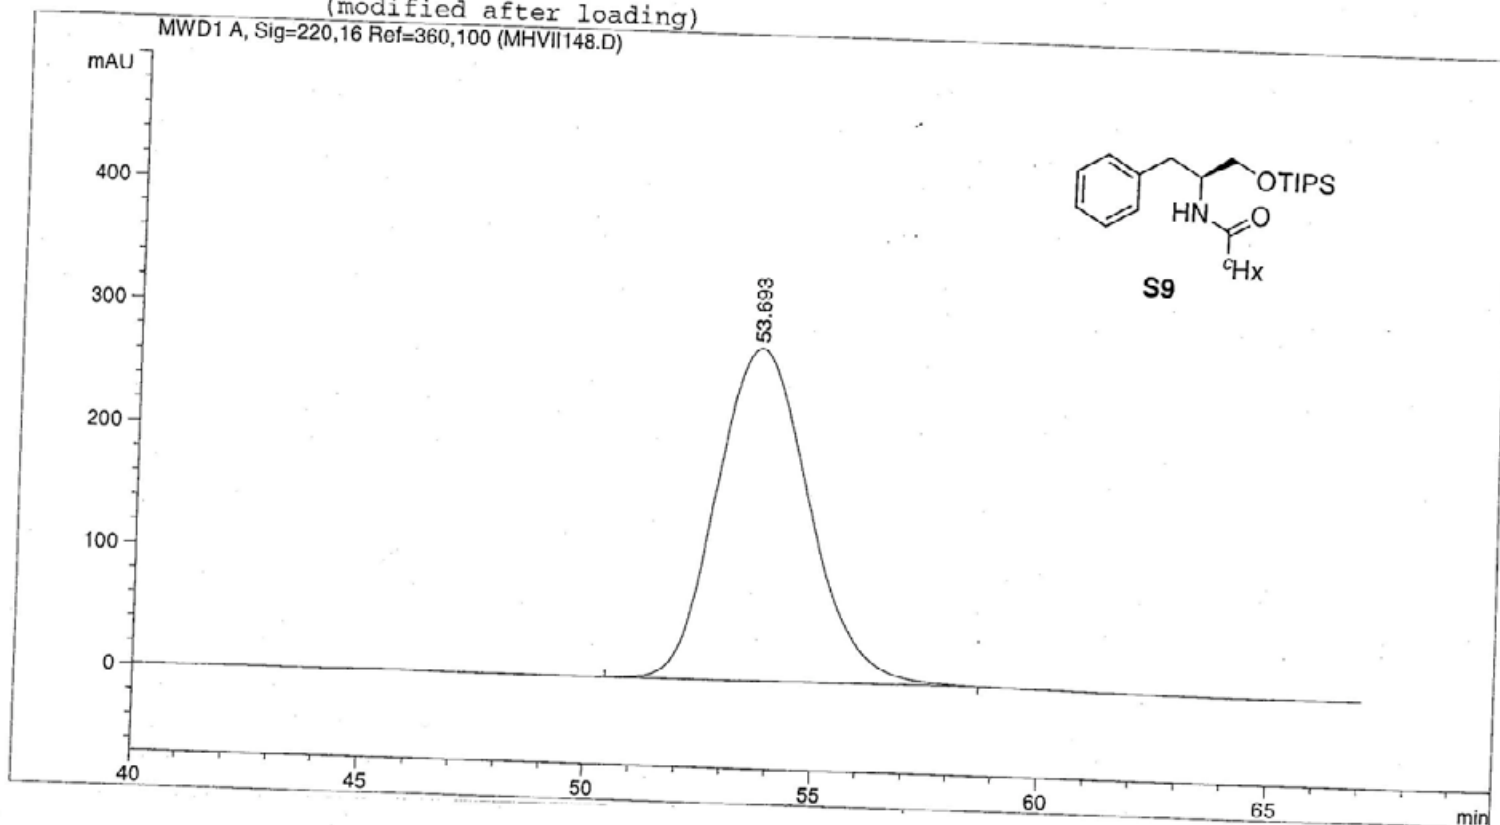

=====  
Area Percent Report  
=====

```

Sorted By      : Signal
Multiplier     : 1.0000
Dilution       : 1.0000
Use Multiplier & Dilution Factor with ISTDs

```

Signal 1: MWD1 A, Sig=220,16 Ref=360,100

| Peak # | RetTime [min] | Type | Width [min] | Area [mAU*s] | Height [mAU] | Area %   |
|--------|---------------|------|-------------|--------------|--------------|----------|
| 1      | 53.693        | BB   | 1.8004      | 3.84635e4    | 272.55997    | 100.0000 |

Totals :                      3.84635e4    272.55997

Results obtained with enhanced integrator!

=====  
\*\*\* End of Report \*\*\*



```

=====
Injection Date : 1/9/2008 3:30:45 PM
Sample Name    :
Acq. Operator  :
Seq. Line     : 1
Location      : Vial 10
Inj           : 1
Inj Volume    : 1 µl

Acq. Method   : C:\HPCHEM\2\METHODS\MATT.M
Last changed  : 1/9/2008 2:50:16 PM
Analysis Method : C:\HPCHEM\2\METHODS\JUSTIN.M
Last changed  : 1/9/2008 3:54:59 PM
               (modified after loading)
=====

```

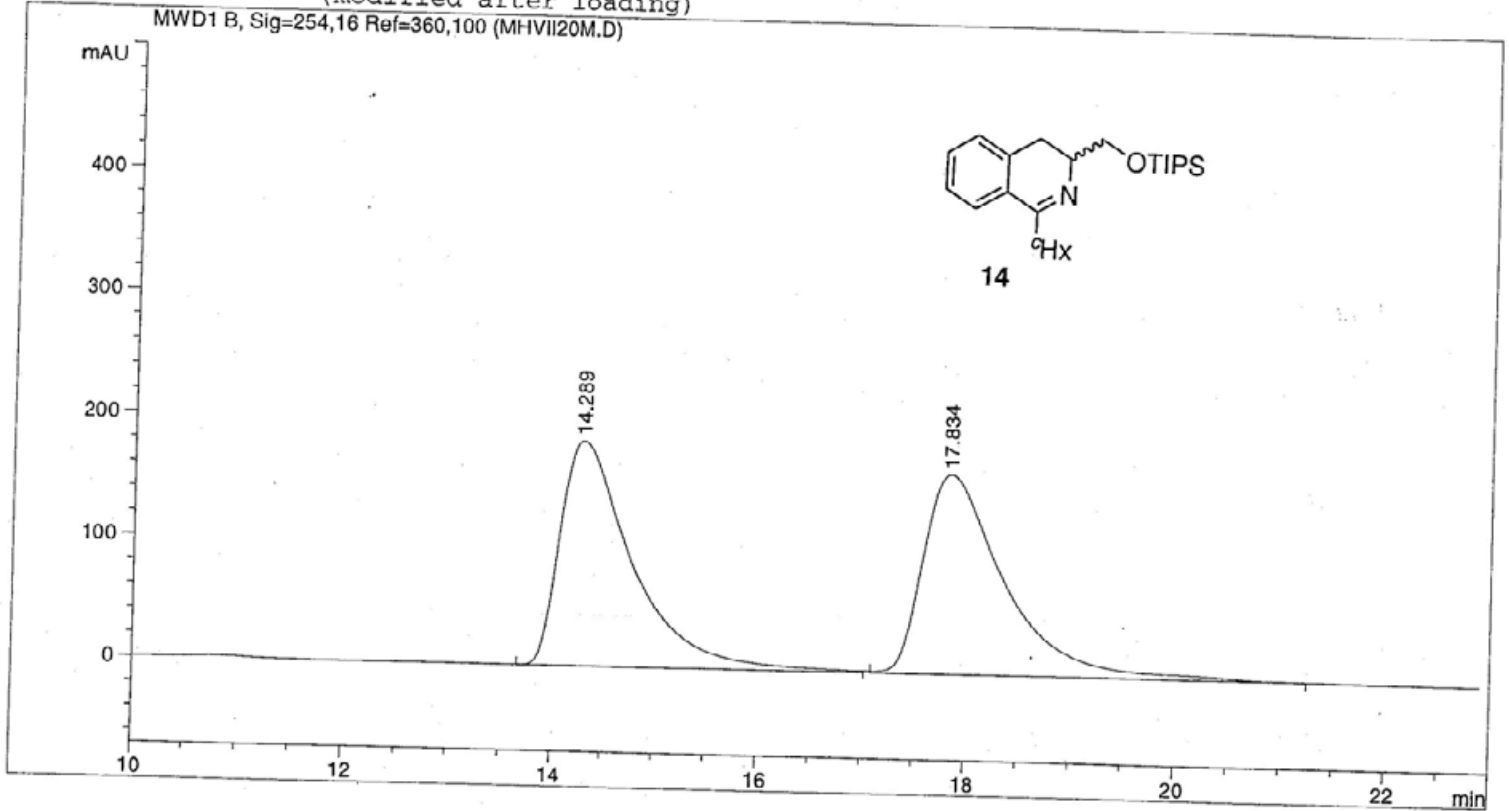

=====  
Area Percent Report  
=====

```

Sorted By      : Signal
Multiplier     : 1.0000
Dilution       : 1.0000
Use Multiplier & Dilution Factor with ISTDs

```

Signal 1: MWD1 B, Sig=254,16 Ref=360,100

| Peak # | RetTime [min] | Type | Width [min] | Area [mAU*s] | Height [mAU] | Area %  |
|--------|---------------|------|-------------|--------------|--------------|---------|
| 1      | 14.289        | BB   | 0.7323      | 9075.85254   | 183.74214    | 50.3283 |
| 2      | 17.834        | BB   | 0.8213      | 8957.44141   | 162.95314    | 49.6717 |

Totals : 1.80333e4 346.69528

Results obtained with enhanced integrator!

=====  
\*\*\* End of Report \*\*\*



```

=====
Injection Date : 1/9/2008 2:51:12 PM      Seq. Line : 1
Sample Name    :                               Location  : Vial 7
Acq. Operator :                               Inj      : 1
                                           Inj Volume: 1 µl

Acq. Method   : C:\HPCHEM\2\METHODS\MATT.M
Last changed  : 1/9/2008 2:50:16 PM
Analysis Method : C:\HPCHEM\2\METHODS\JUSTIN.M
Last changed  : 1/9/2008 3:57:04 PM
                (modified after loading)
=====

```

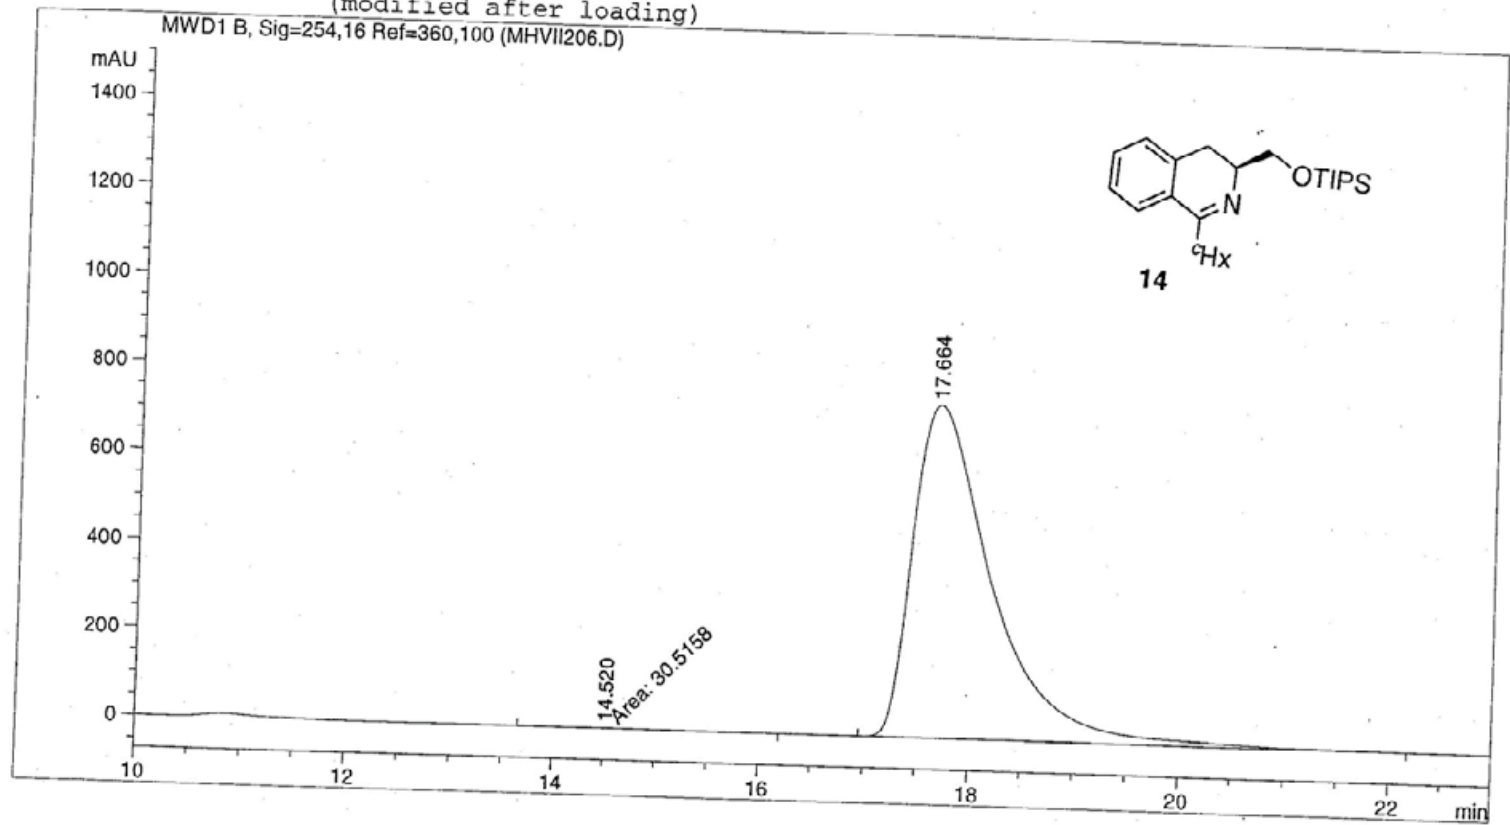

=====  
Area Percent Report  
=====

```

Sorted By      : Signal
Multiplier    : 1.0000
Dilution      : 1.0000
Use Multiplier & Dilution Factor with ISTDs

```

Signal 1: MWD1 B, Sig=254,16 Ref=360,100

| Peak #   | RetTime [min] | Type | Width [min] | Area [mAU*s] | Height [mAU] | Area %  |
|----------|---------------|------|-------------|--------------|--------------|---------|
| 1        | 14.520        | MM   | 1.0958      | 30.51582     | 4.64142e-1   | 0.0770  |
| 2        | 17.664        | PB   | 0.7885      | 3.95936e4    | 749.21863    | 99.9230 |
| Totals : |               |      |             | 3.96241e4    | 749.68277    |         |

Results obtained with enhanced integrator!

=====  
\*\*\* End of Report \*\*\*

Pulse Sequence: s2pu1  
 Solvent: CDC13  
 Ambient temperature  
 INOVA-500 "bullwinkle"  
 Relax. delay 5.000 sec  
 Pulse 94.4 degrees  
 Acq. time 3.001 sec  
 Width 10504.2 Hz  
 6 repetitions  
 OBSERVE H1, 489.7417206 MHz  
 DATA PROCESSING  
 FT size 262144  
 Total time 2 min, 8 sec

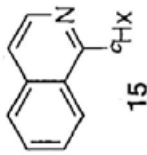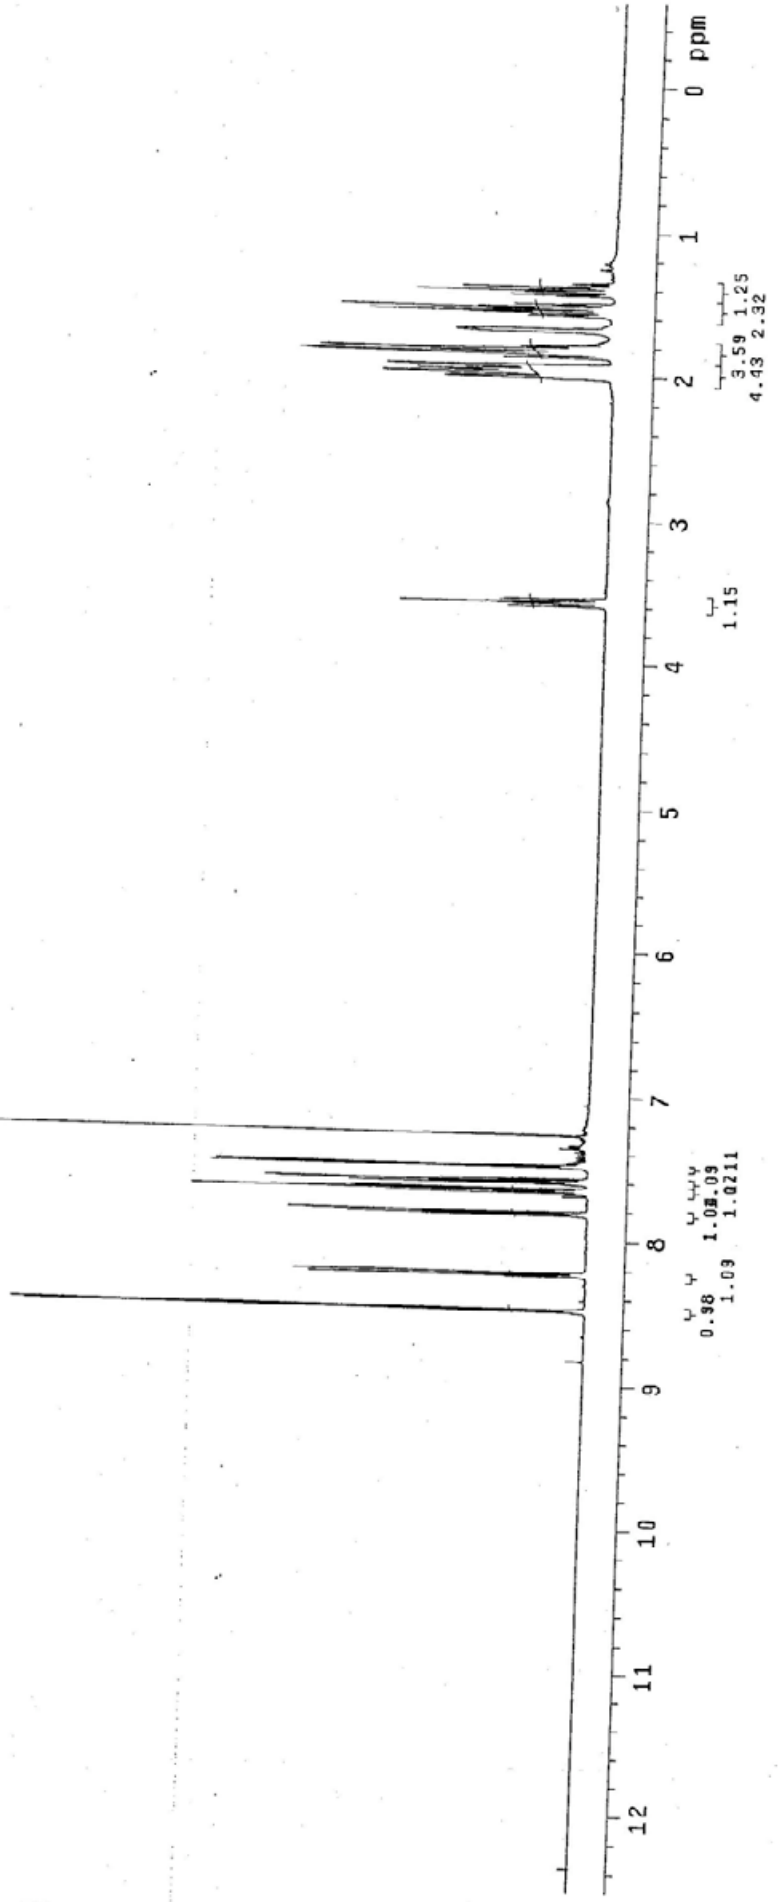

Solvent: CDCl<sub>3</sub>  
 Ambient temperature  
 User: I-14-87  
 INOVA-500 "rocky"  
 PULSE SEQUENCE  
 Relax. delay 0.763 sec  
 Pulse 77.6 degrees  
 Acq. time 1.736 sec  
 Width 37735.8 Hz  
 1000000 repetitions  
 OBSERVE C13, 125.783286 MHz  
 DECOUPLE H1, 500.2332753 MHz  
 power 44 dB, 560.2332753 MHz  
 continuously on  
 WALTZ-16 modulated  
 DATA PROCESSING  
 Line broadening 0.3 Hz  
 FT size 131072  
 Total time 6942.2 hours

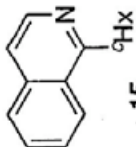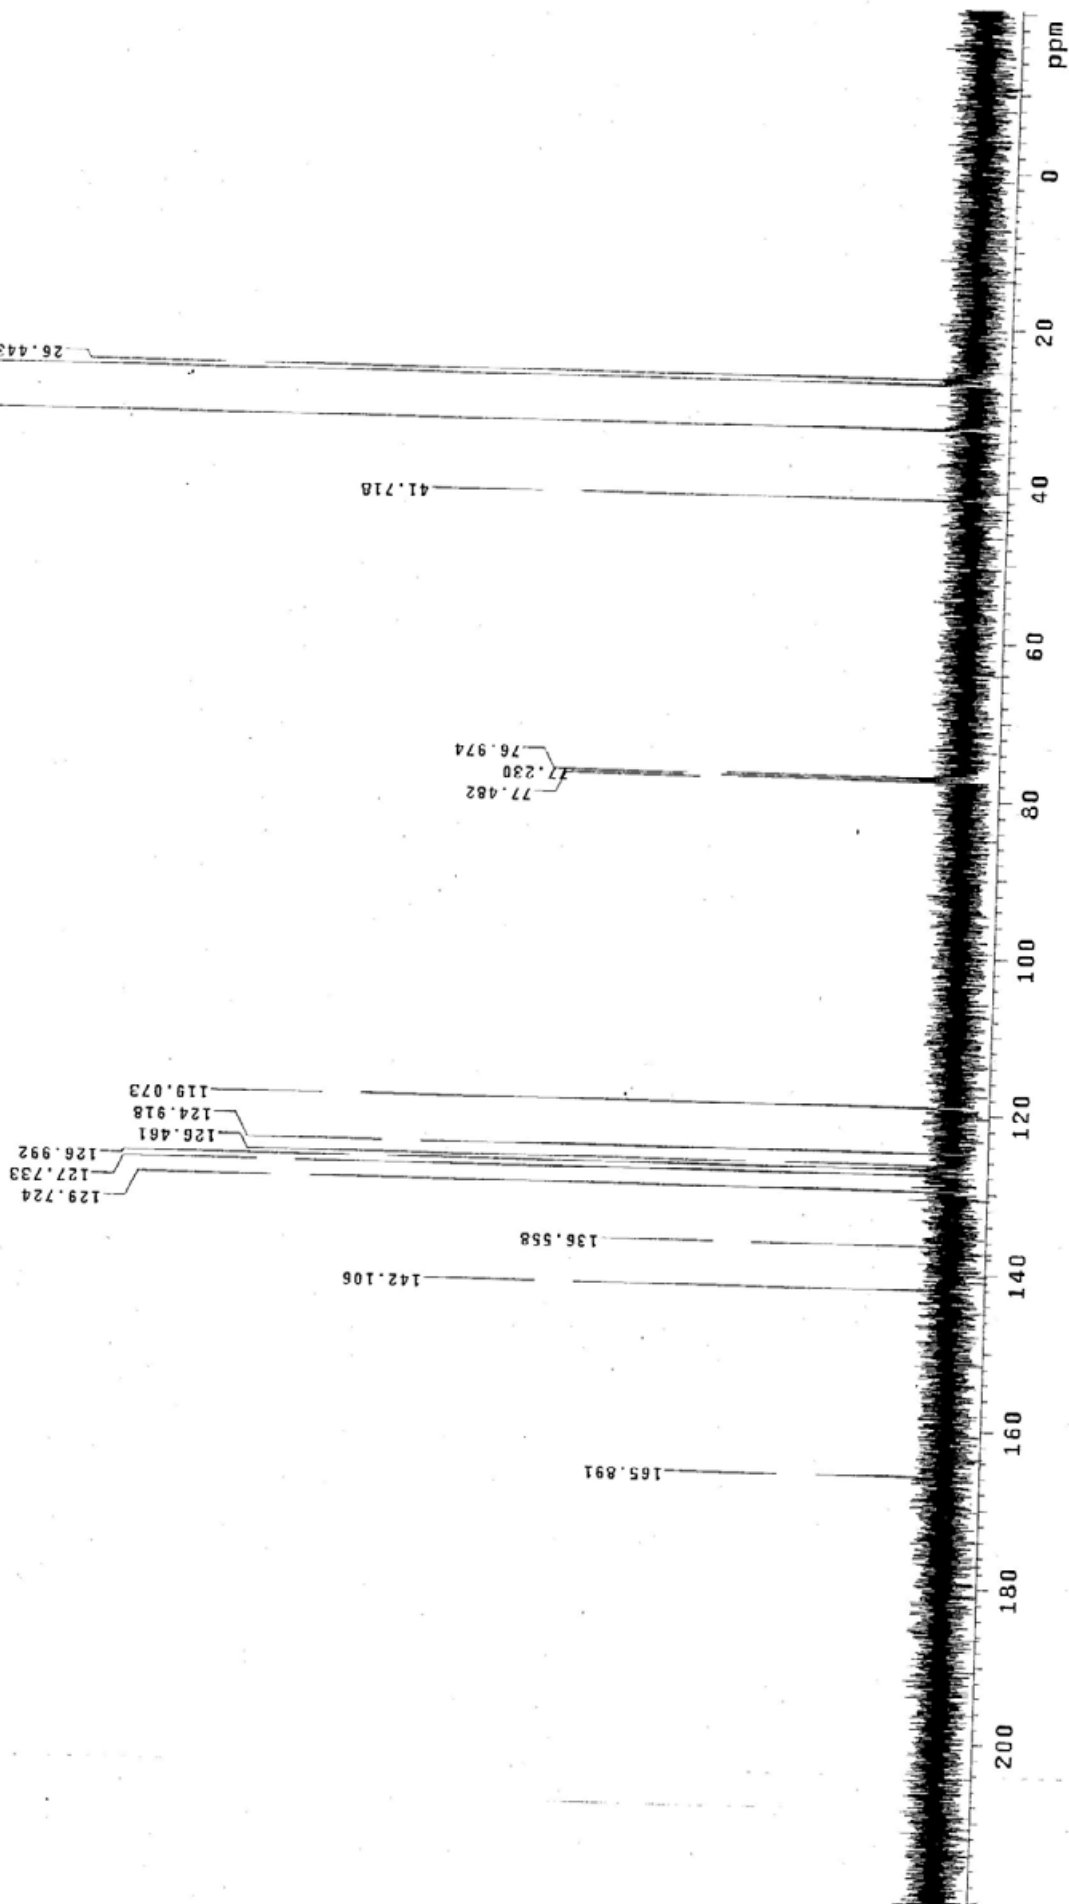

Pulse Sequence: s2pul  
 Solvent: CDCl3  
 Ambient temperature  
 INOVA-500 "bullwinkle"  
 Relax. delay 5.000 sec  
 Pulse 69.0 degrees  
 Acq. time 3.001 sec  
 Width 10504.2 Hz  
 2 repetitions  
 OBSERVE HI, 499.7417206 MHz  
 DATA PROCESSING  
 FI size 262144  
 Total time 2 min, 8 sec

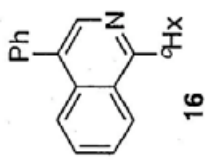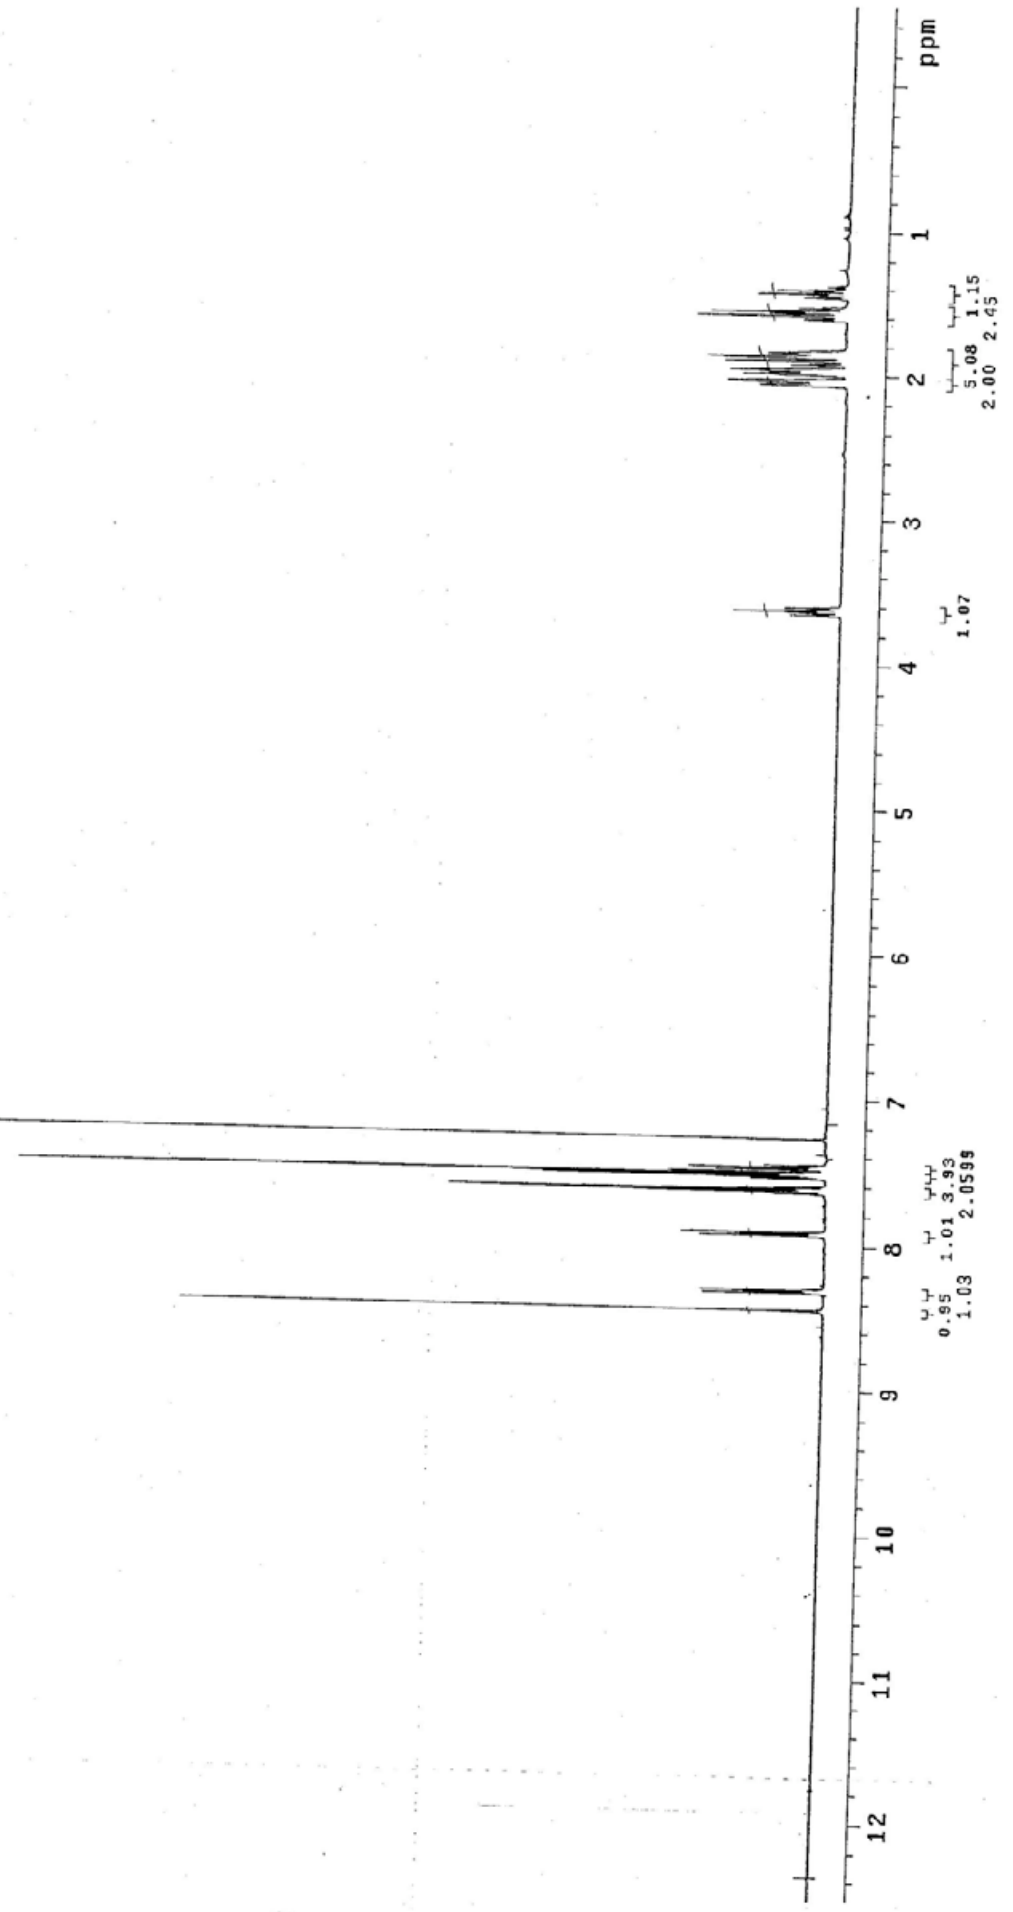

Solvent: CDCl3  
 Ambient temperature  
 User: 1-14-87  
 INOVA-500 "rocky"  
 PULSE SEQUENCE  
 Relax. delay 0.763 sec  
 Pulse 69.0 degrees  
 Acq. time 1.736 sec  
 Vdth 37735.8 Hz  
 128 repetitions  
 OBSERVE C13, 125.7832314 MHz  
 DECOUPLE H1, 500.2332753 MHz  
 Power 37 dB  
 continuously on  
 WALTZ-16 modulated  
 DATA PROCESSING  
 Line broadening 0.3 Hz  
 FT size 131072  
 Total time 5 minutes

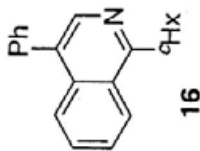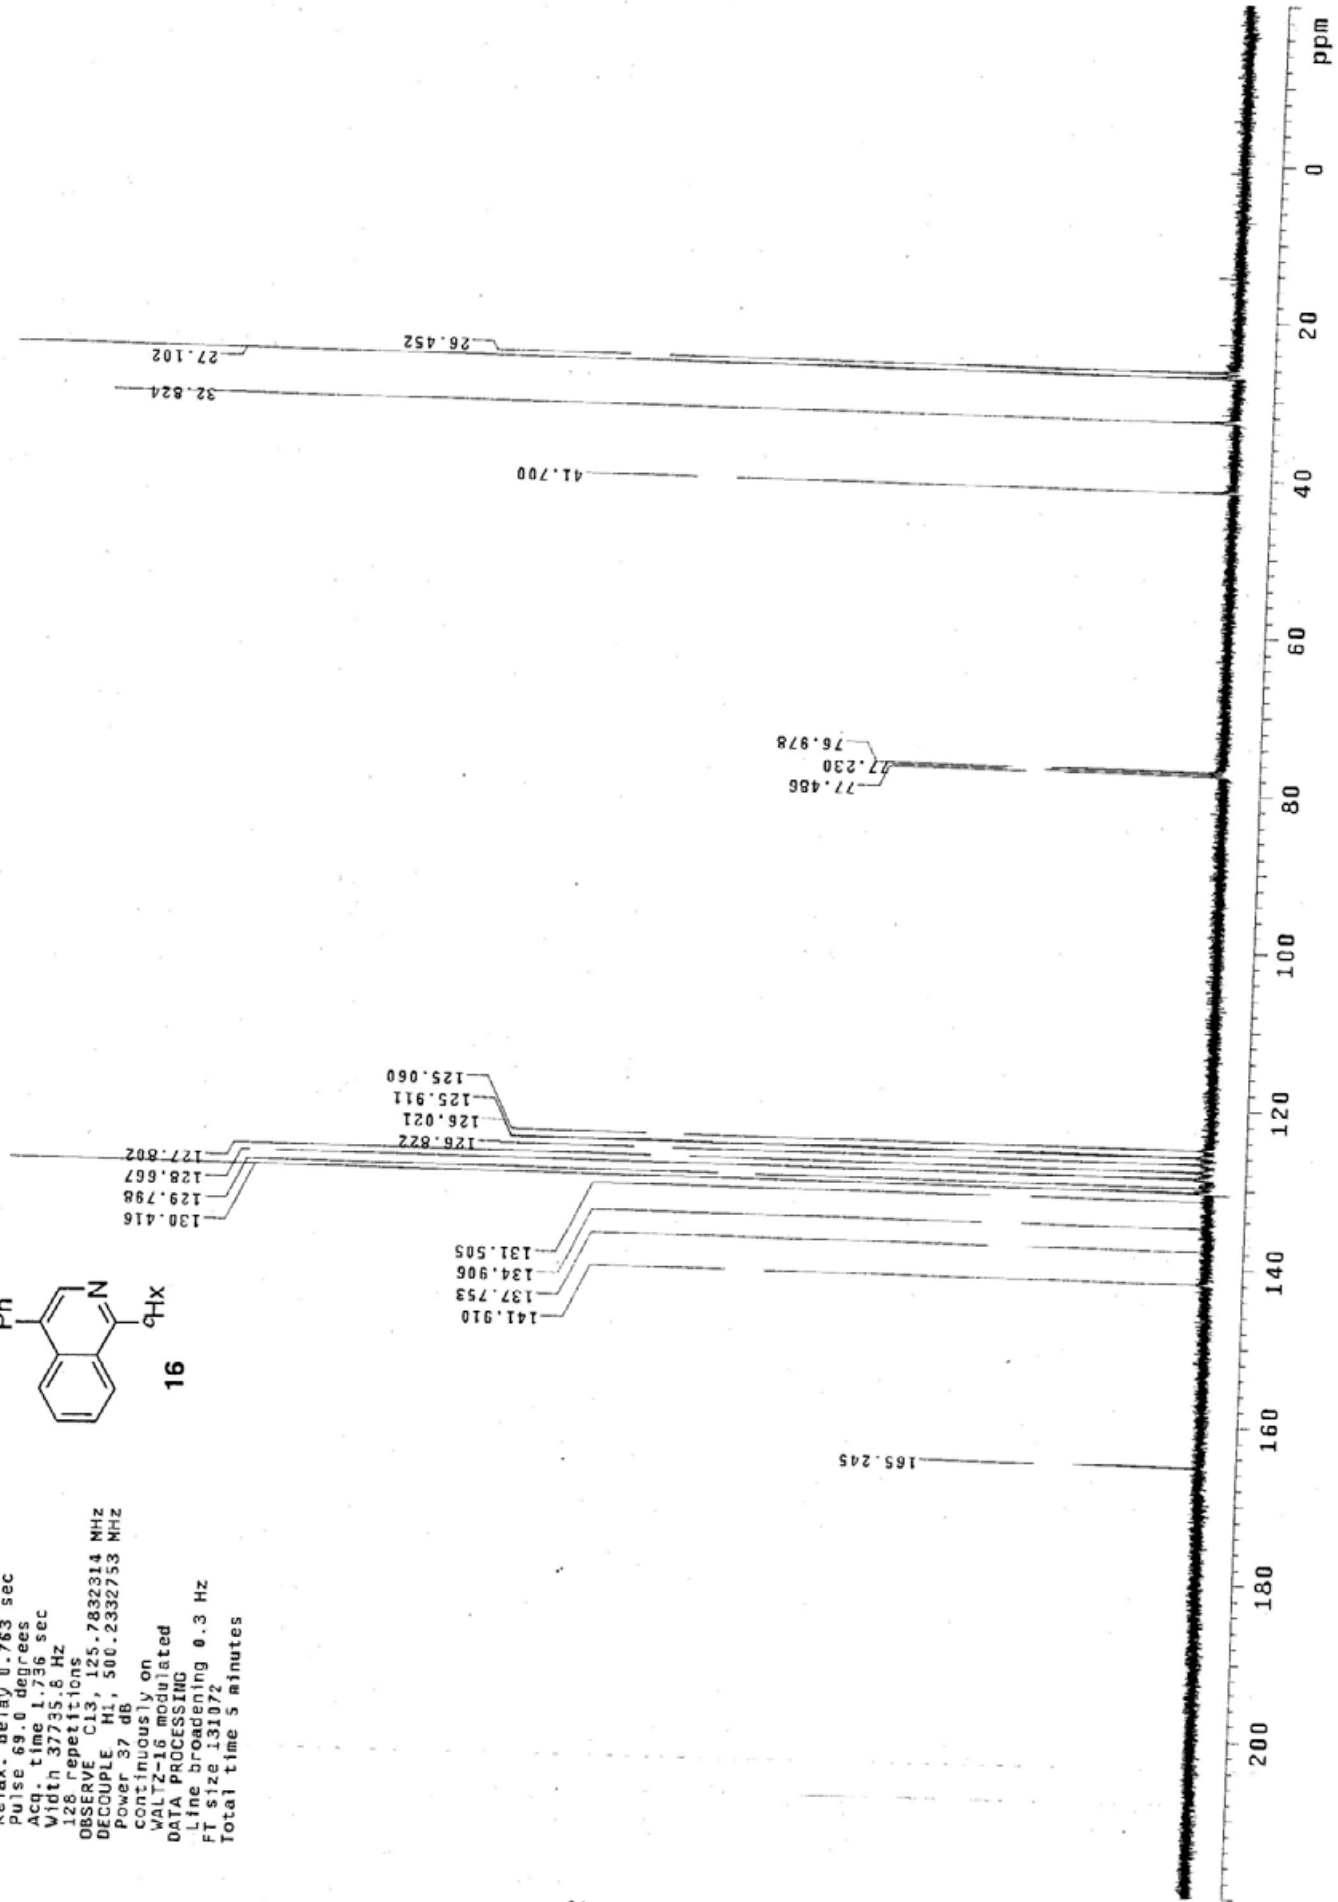

Pulse Sequence: szpu1  
Solvent: CDCl3  
Ambient temperature  
INOVA-500 "bottlewinkler"  
Relax. delay 5.000 sec  
Pulse 89.0 degrees  
Acq. time 3.001 sec  
Width 10504.2 Hz  
6 repetitions  
OBSERVE HI, 499.7417206 MHz  
DATA PROCESSING  
FT size 262144  
Total time 2 min, 8 sec

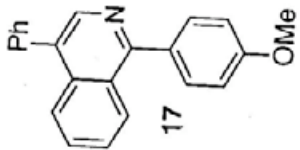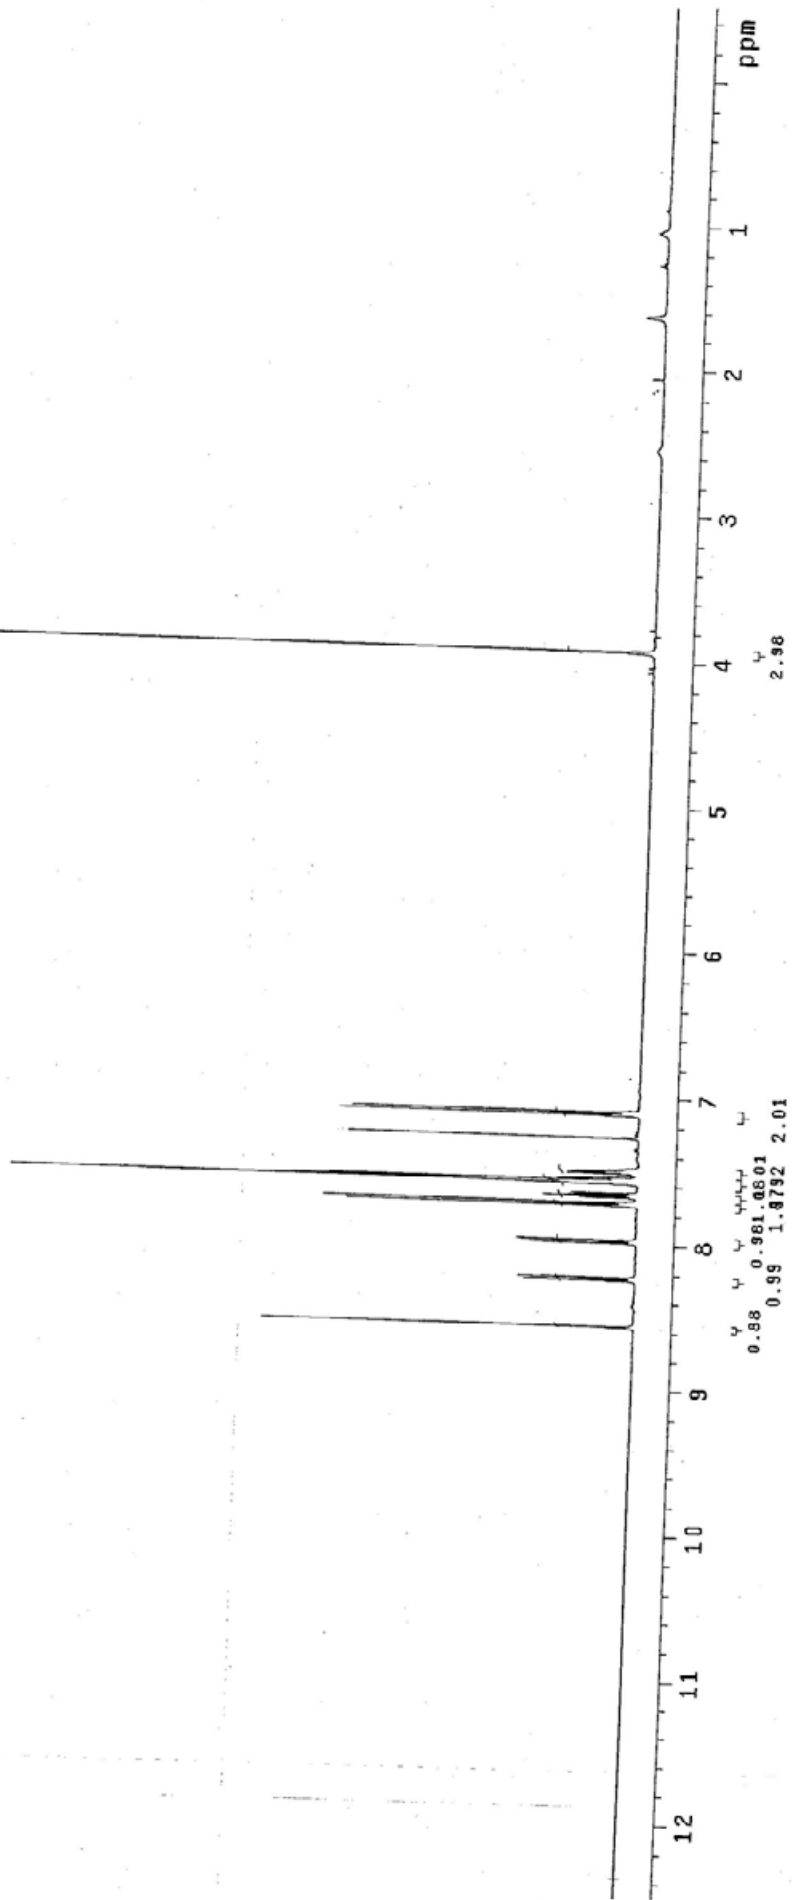

Solvent: CDCl3  
 Ambient temperature  
 User: 1-14-87  
 INOVA-500 "rocky"  
 PULSE SEQUENCE  
 Relax. delay 0.763 sec  
 Pulse 69.0 degrees  
 Acq. time 1.736 sec  
 Width 3735.8 Hz  
 32 repetitions  
 OBSERVE C13, 125.7832355 MHz  
 DECOUPLE H1, 500.2332753 MHz  
 Power 37 dB  
 WALTZ-16 modulated  
 DATA PROCESSING  
 Line broadening 0.3 Hz  
 FT size 131072  
 Total time 1 minute

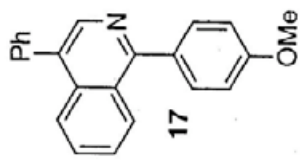

113.998  
 125.362  
 126.557  
 127.001  
 127.989  
 128.054  
 128.754  
 130.159  
 130.370  
 131.519

142.180  
 137.446  
 135.391  
 132.297  
 132.214

159.963  
 160.169

77.486  
 77.230  
 76.978

55.574

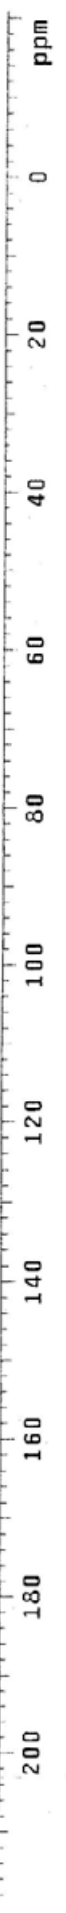

Pulse Sequence: s2pul  
Solvent: CDCl3  
Ambient temperature  
INOVA-500 "bullwinkle"

Relax. delay 5.000 sec  
Pulse 94.4 degrees  
Acq. time 3.001 sec  
Width 10504.2 Hz  
7 repetitions  
OBSERVE H1 499.7417205 MHz  
DATA PROCESSING  
FT size 282144  
Total time 2 min, 8 sec

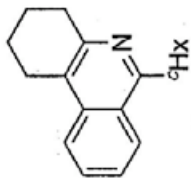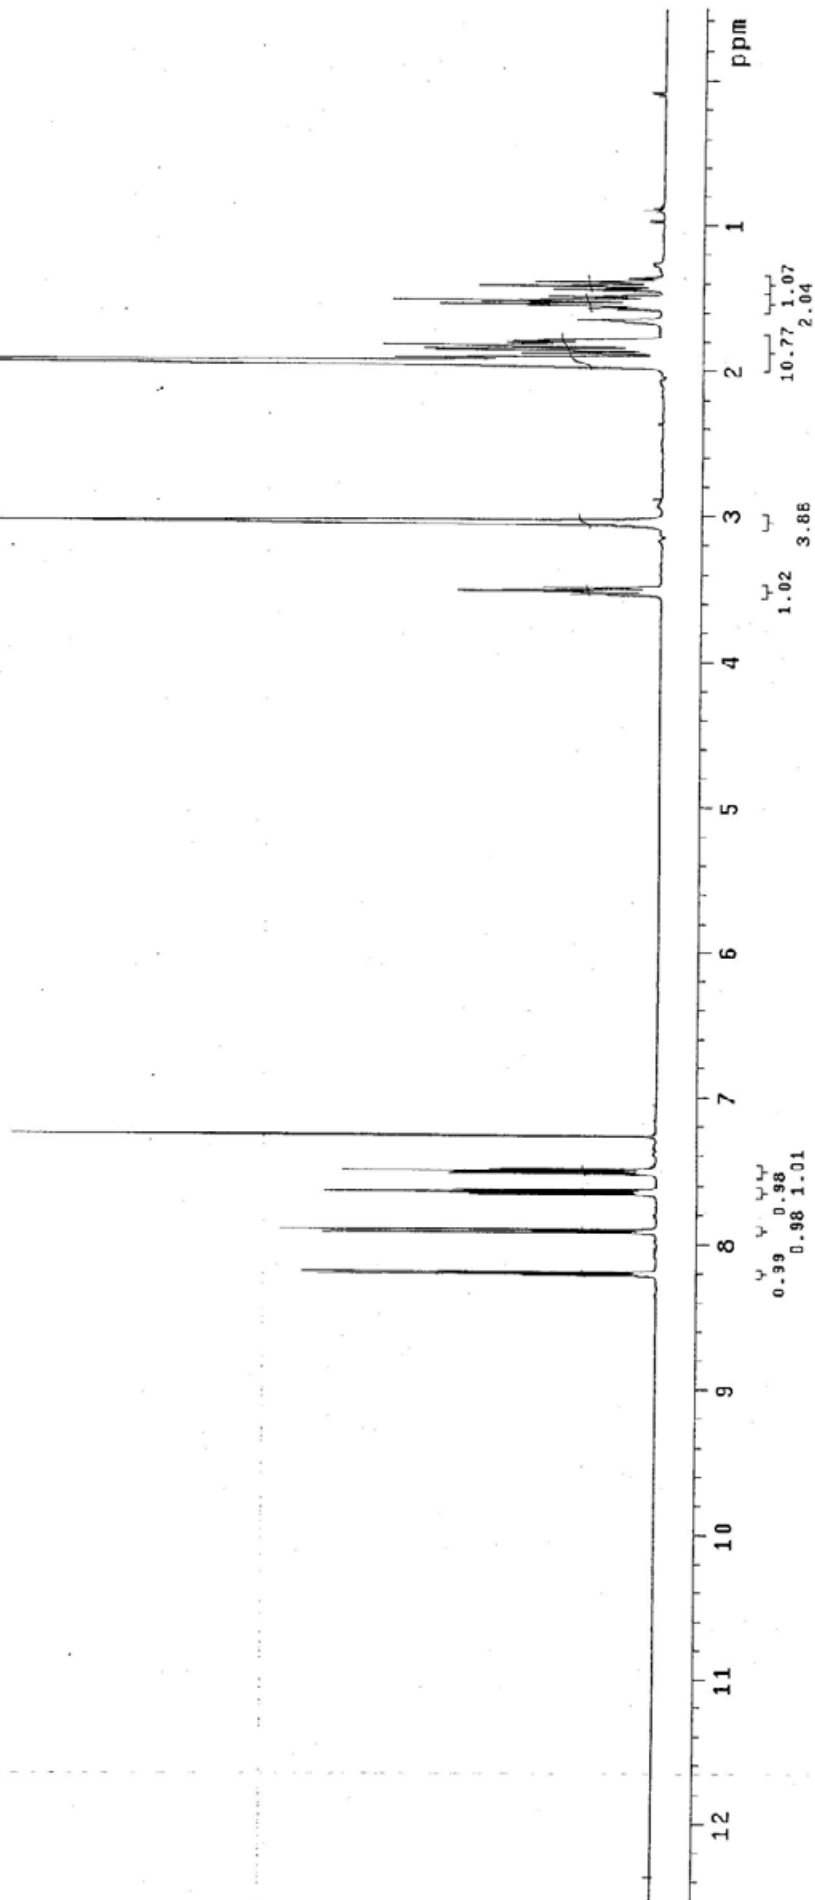



Solvent: CDCl3  
Ambient temperature  
User: 1-14-87  
INOVA-500 "rocky"

PULSE SEQUENCE  
Relax. delay 0.753 sec  
Pulse 77.6 degrees  
Acq. time 1.736 sec  
Width 37295.8 Hz  
255 repetitions

OBSERVE CH3, 125.7832320 MHz  
DECOUPLE H1, 500.2332753 MHz  
Power 44 dB  
continuously on  
WALTZ-16 modulated  
DATA PROCESSING  
Line broadening 0.3 Hz  
FI size 131072  
Total time 10 minutes

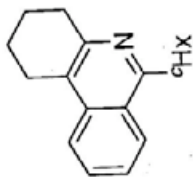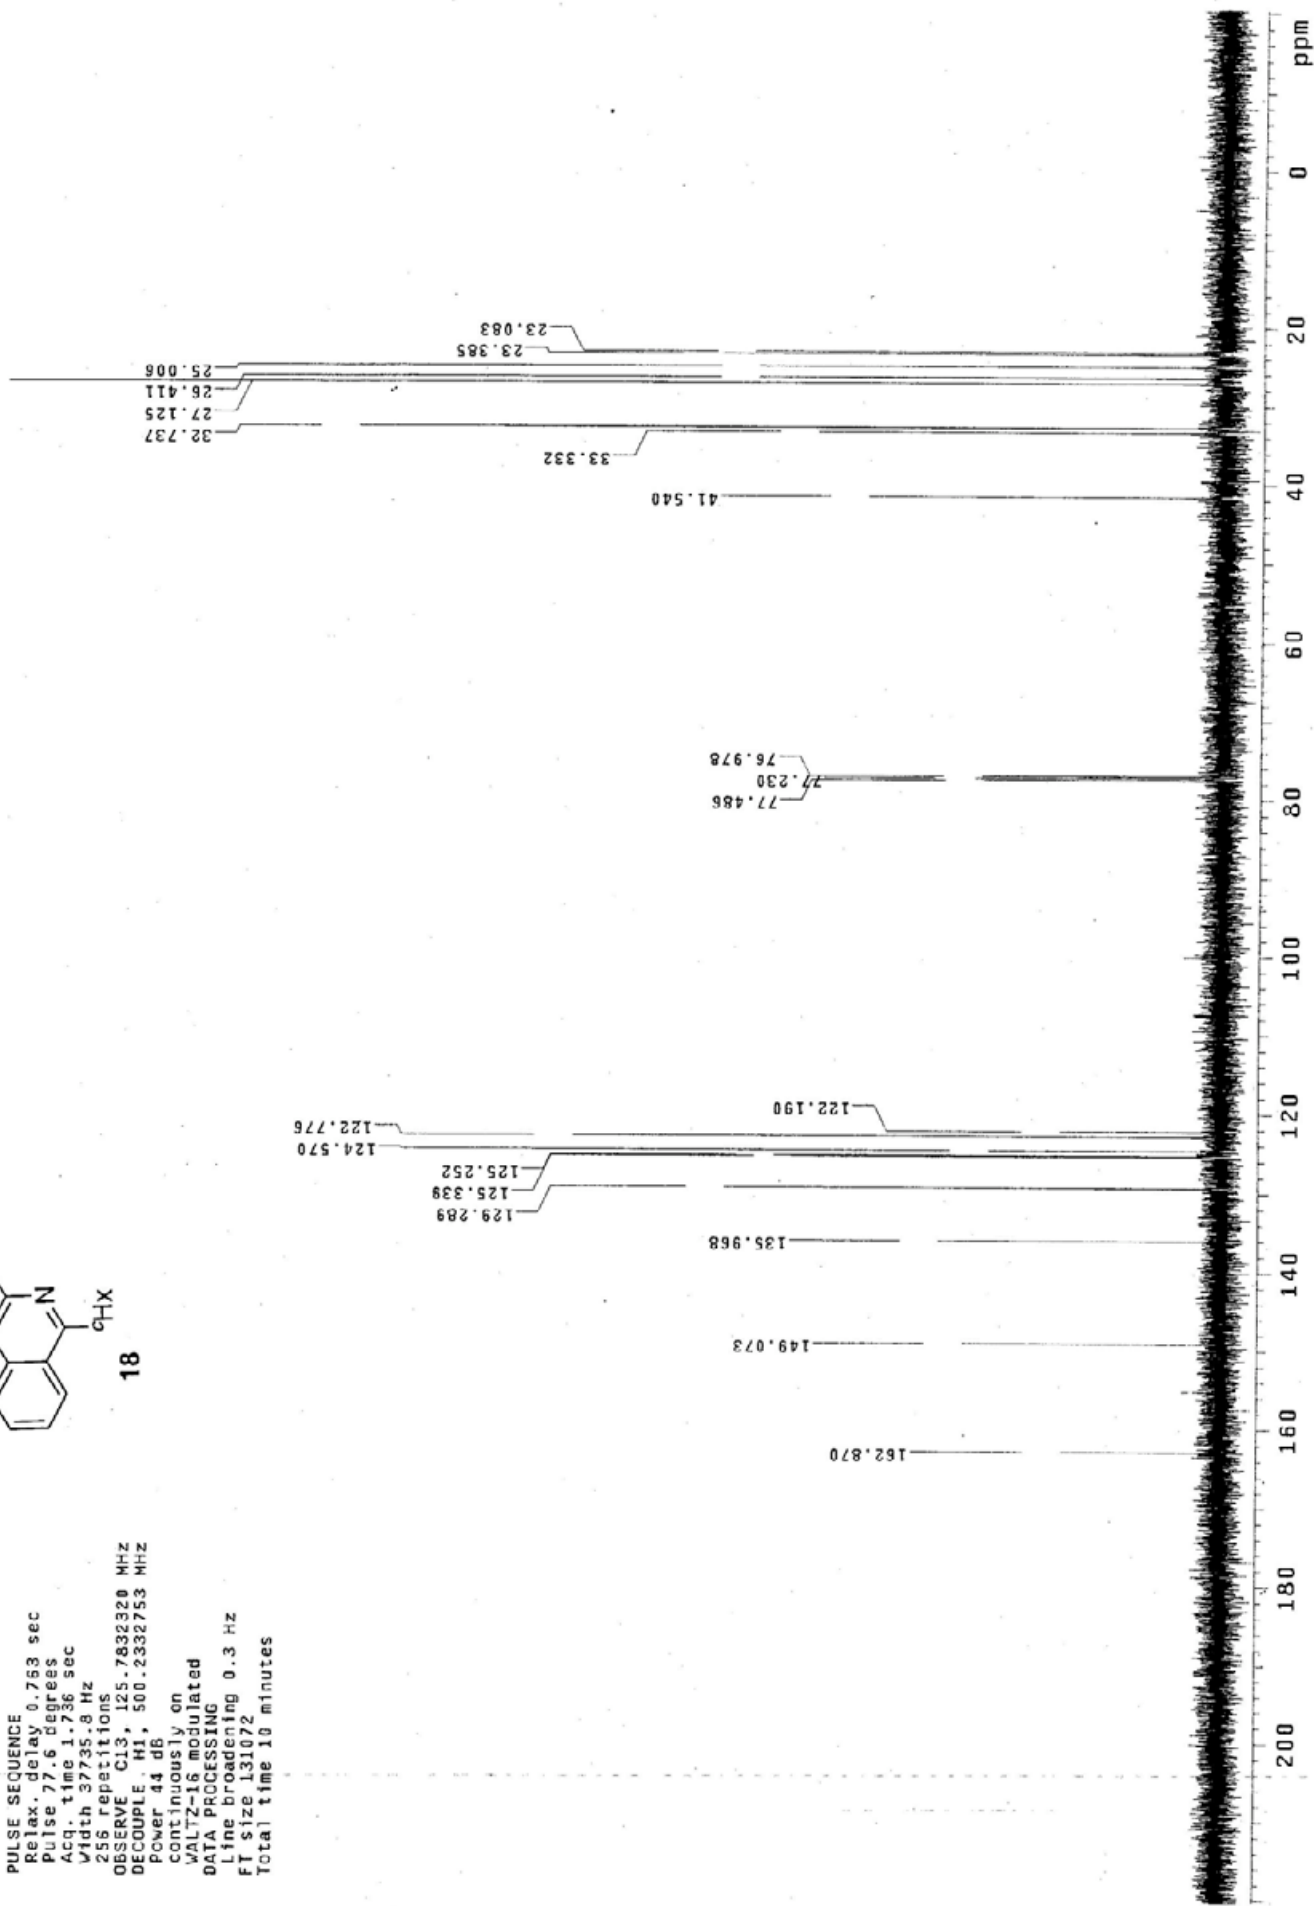

Pulse Sequence: s2pul  
Solvent: CDCl3  
Ambient temperature  
INOVA-500 "bullwinkle"  
Relax. delay 5.000 sec  
Pulse 85.0 degrees  
Acq. time 3.001 sec  
Width 10504.2 Hz  
7 repetitions  
OBSERVE H1 499.7417206 MHz  
DATA PROCESSING  
F1 size 262144  
Total time 2 min, 8 sec

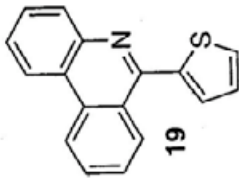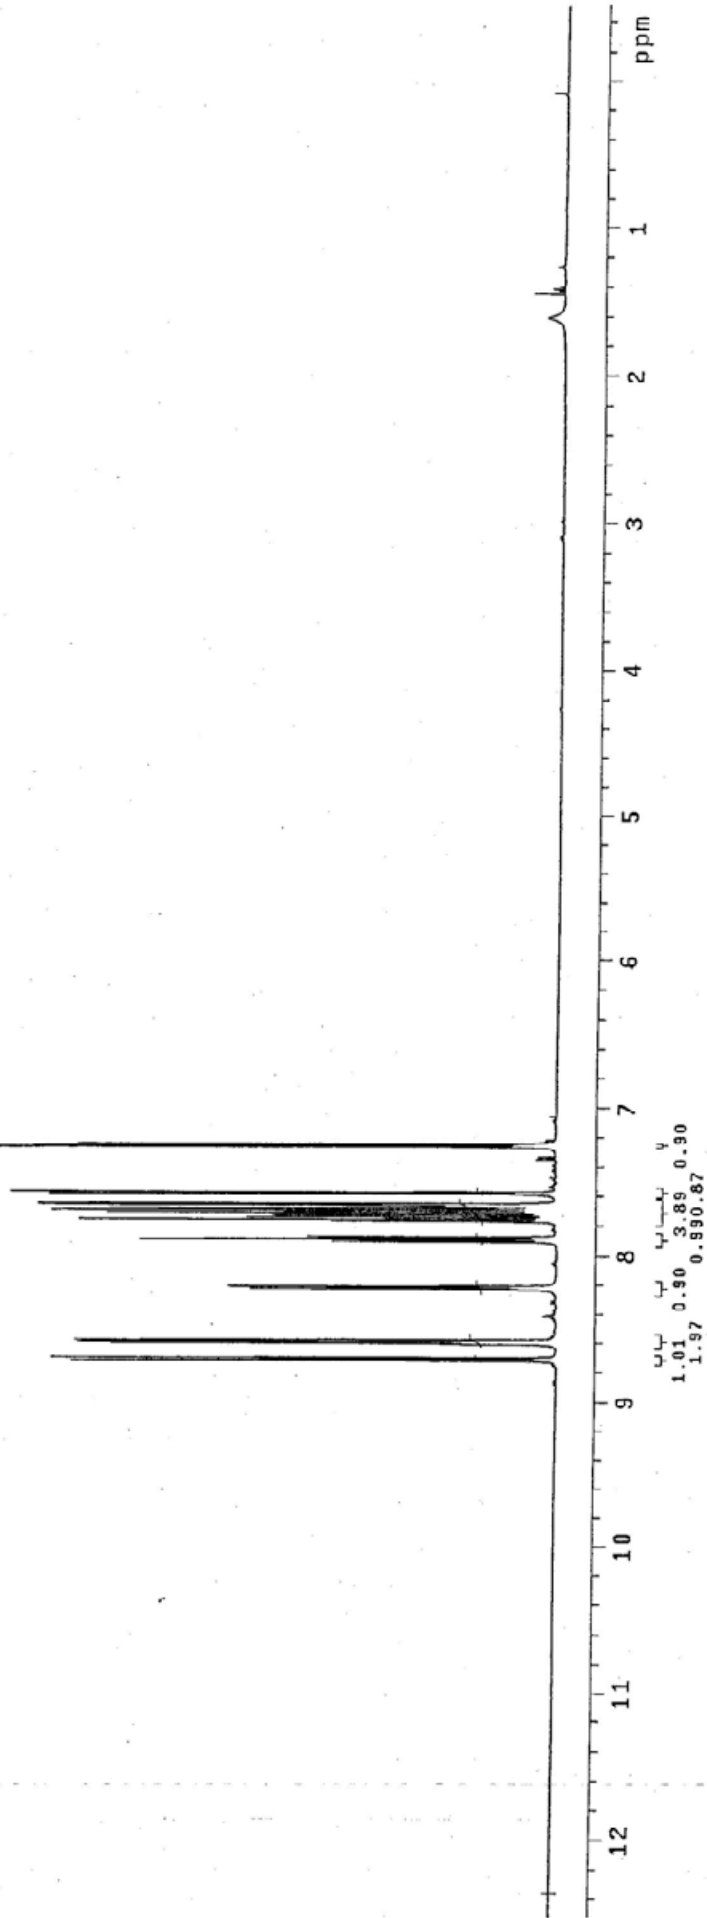

Pulse Sequence: s2pul  
 Solvent: CDCl3  
 Ambient temperature  
 User: 1-14-87  
 INOVA-500 "bullwinkle"

Relax. delay 0.050 sec  
 Pulse 36.7 degrees  
 Acq. time 2.000 sec  
 Width 31397.2 Hz  
 216 repetitions  
 OBSERVE C13, 125.6601362 MHz  
 DECOUPLE H1, 498.7442194 MHz  
 Power 34 dB  
 continuously on  
 WALTZ-16 modulated  
 DATA PROCESSING  
 Line broadening 1.0 Hz  
 FT size 131072  
 Total time 571 hr, 54 min, 55 sec

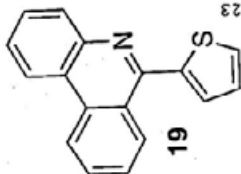

130.823  
 130.411  
 129.454  
 129.077  
 128.314  
 128.123  
 127.632  
 127.563  
 127.220  
 124.932  
 123.705  
 122.519  
 122.084

159.224  
 143.877  
 142.664  
 133.789

77.485  
 77.230  
 76.978

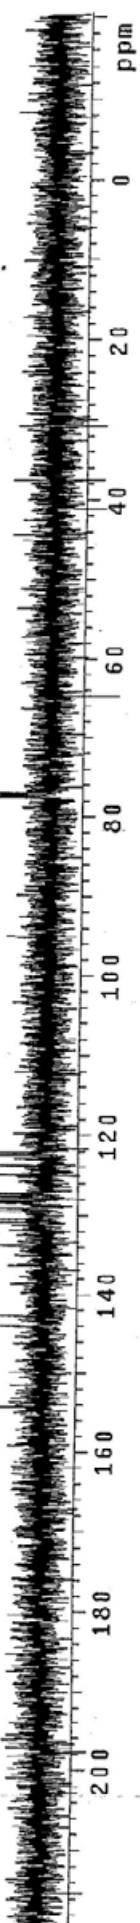

Pulse Sequence: s2pu1  
Solvent: CDCl3  
Ambient temperature  
INOVA-500 "bullwinkle"

Relax. delay 5.000 sec  
Pulse 89.0 degrees  
Acc. time 3.001 sec  
Width 10504.2 Hz  
5 repetitions  
OBSERVE H1 499.7417206 MHz  
DATA PROCESSING  
FT size 262144  
Total time 2 min, 8 sec

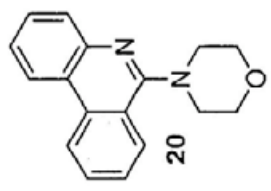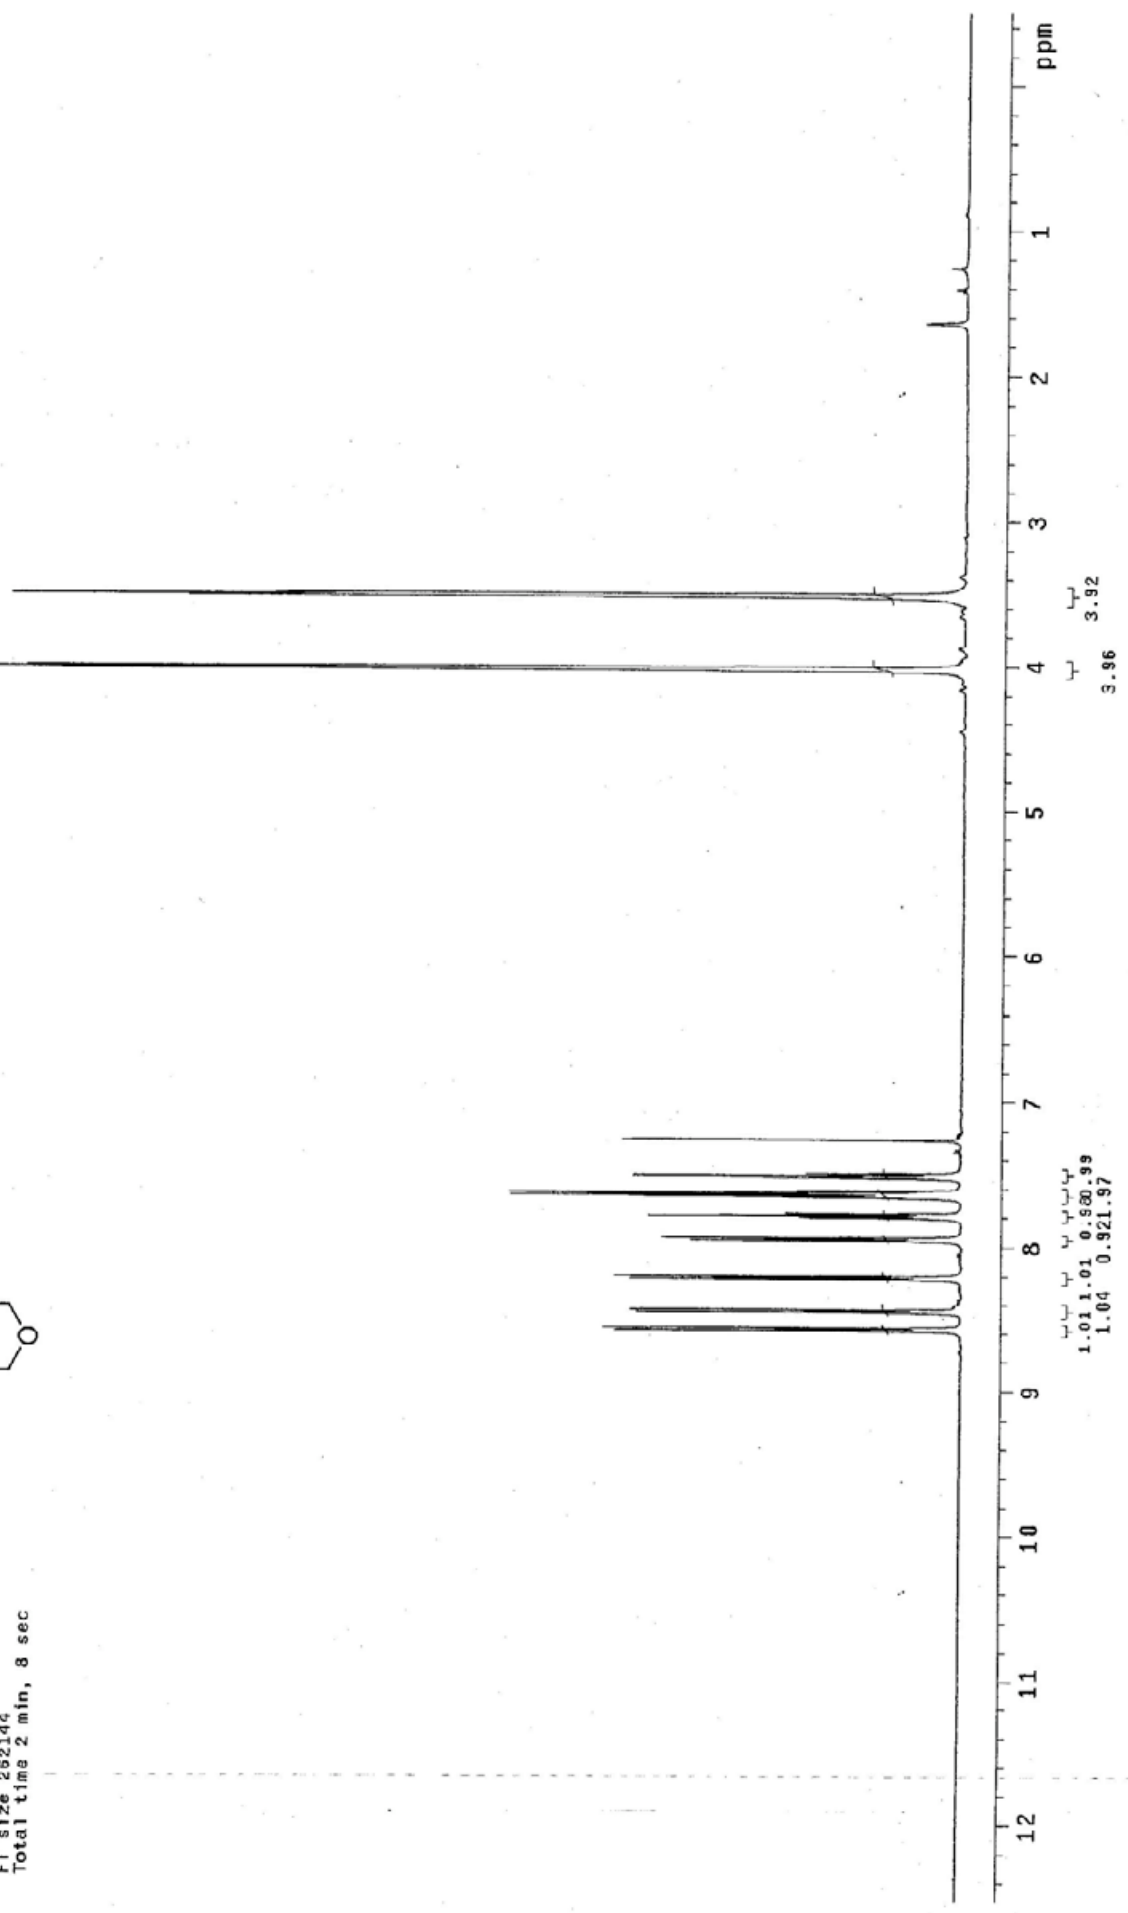

Solvent: CDCl<sub>3</sub>  
 Ambient temperature  
 User: 1-14-87  
 INOVA-500 "rocky"  
**PULSE SEQUENCE**  
 Relax. delay 0.763 sec  
 Pulse 69.0 degrees  
 Acq. time 1.736 sec  
 Width 37735.8 Hz  
 40 repetitions  
**OBSERVE** C13, 125.7832470 MHz  
**DECOUPLE** H1, 50.2332753 MHz  
 Power 37 dB  
 continuously on  
 WALTZ-16 modulated  
**DATA PROCESSING**  
 Line broadening 0.3 Hz  
 FT size 131072  
 Total time 1 minutes

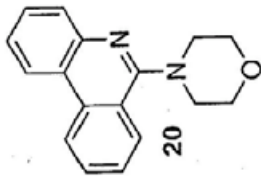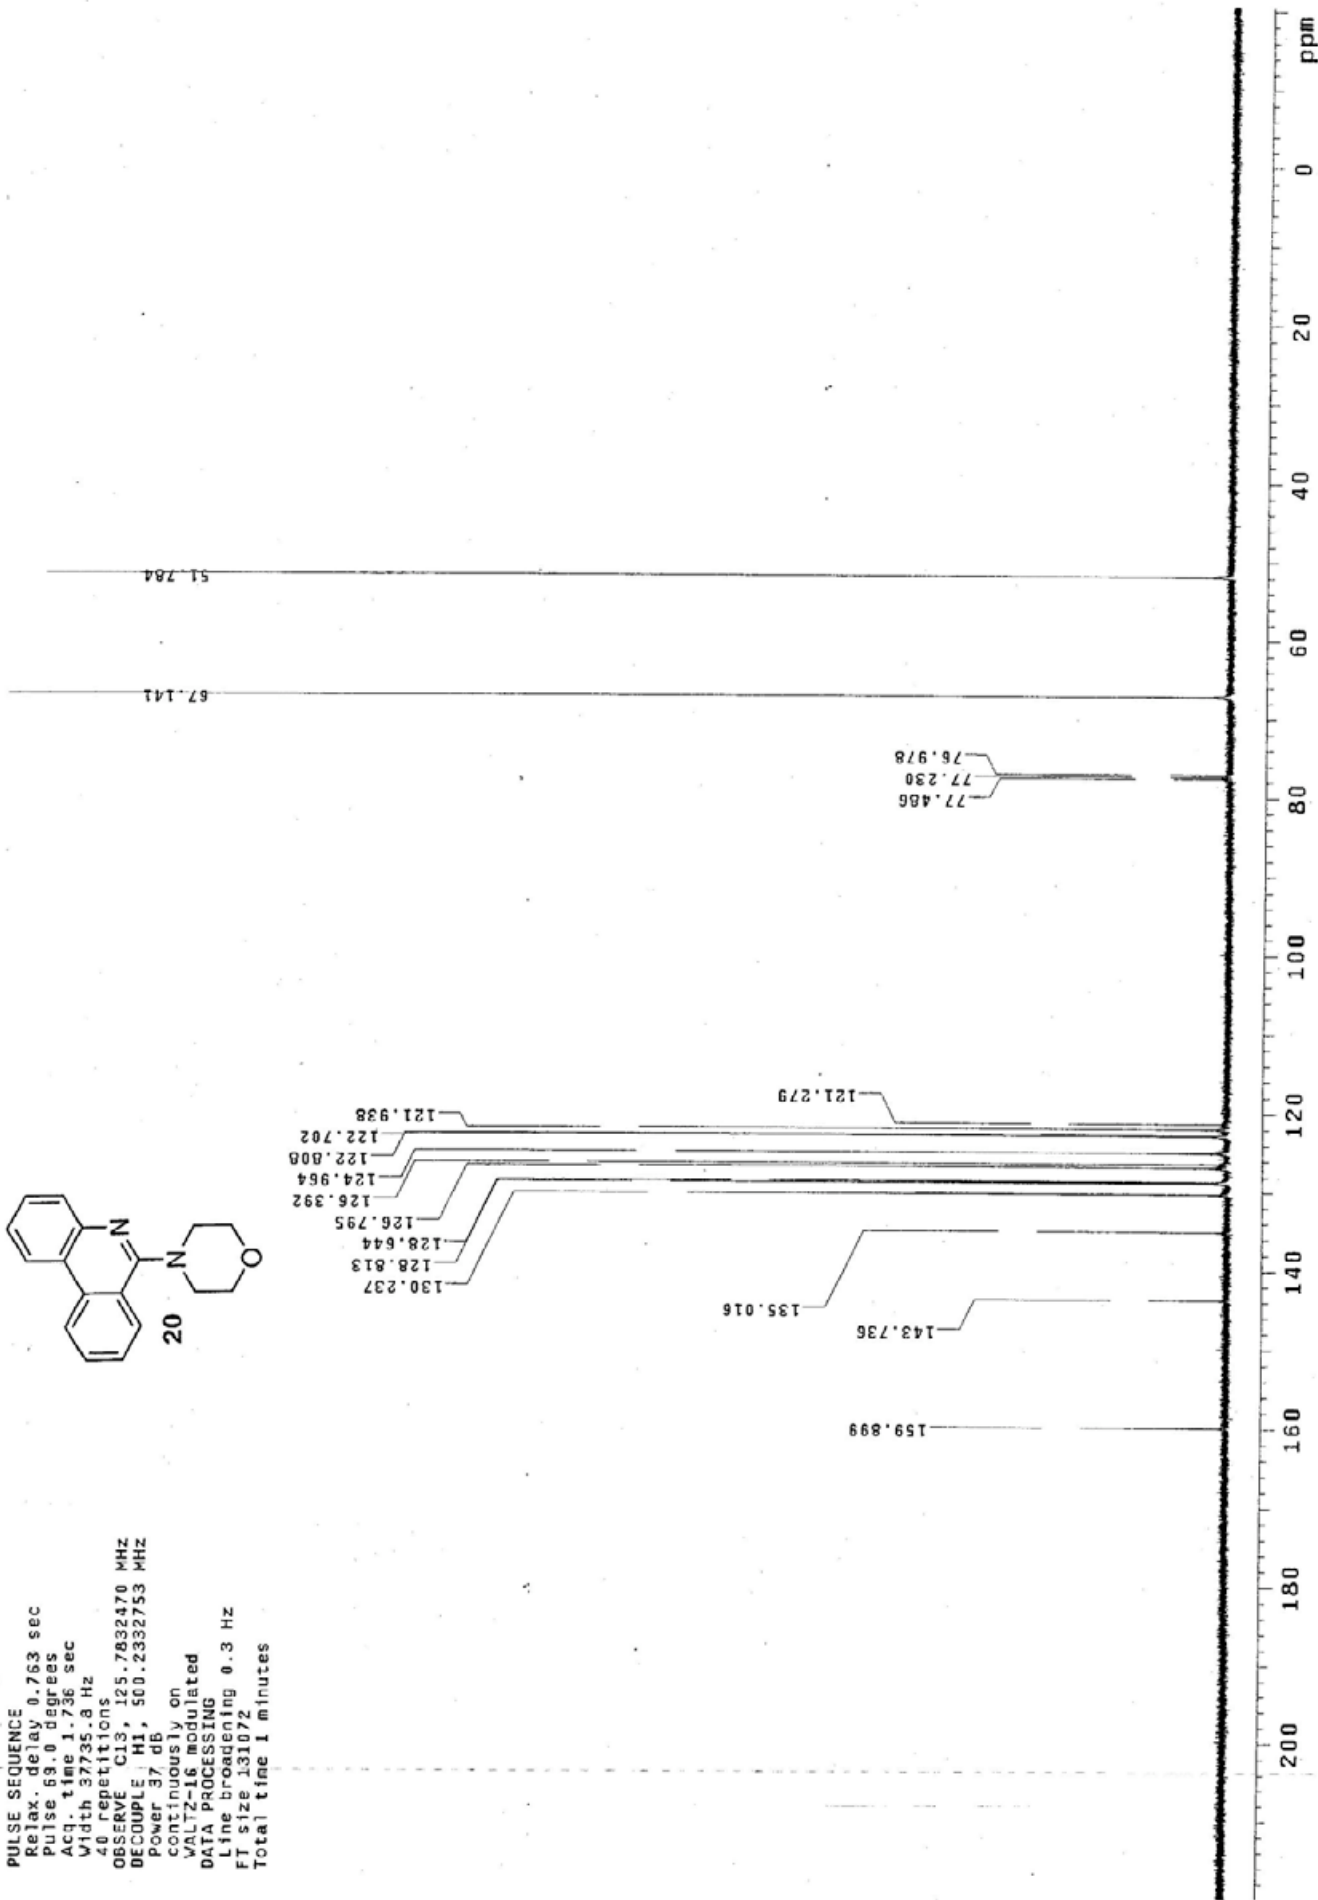

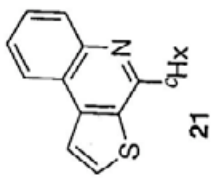

Pulse Sequence: s2pul  
 Solvent: CDCl3  
 Ambient temperature  
 INOVA-500 "bulwinkle"  
 Relax. delay 5.000 sec  
 Pulse 94.4 degrees  
 Acq. time 3.001 sec  
 Width 10504.2 Hz  
 16 repetitions  
 OBSERVE H1, 499.7417206 MHz  
 DATA PROCESSING  
 FI size 262144  
 Total time 2 min, 8 sec

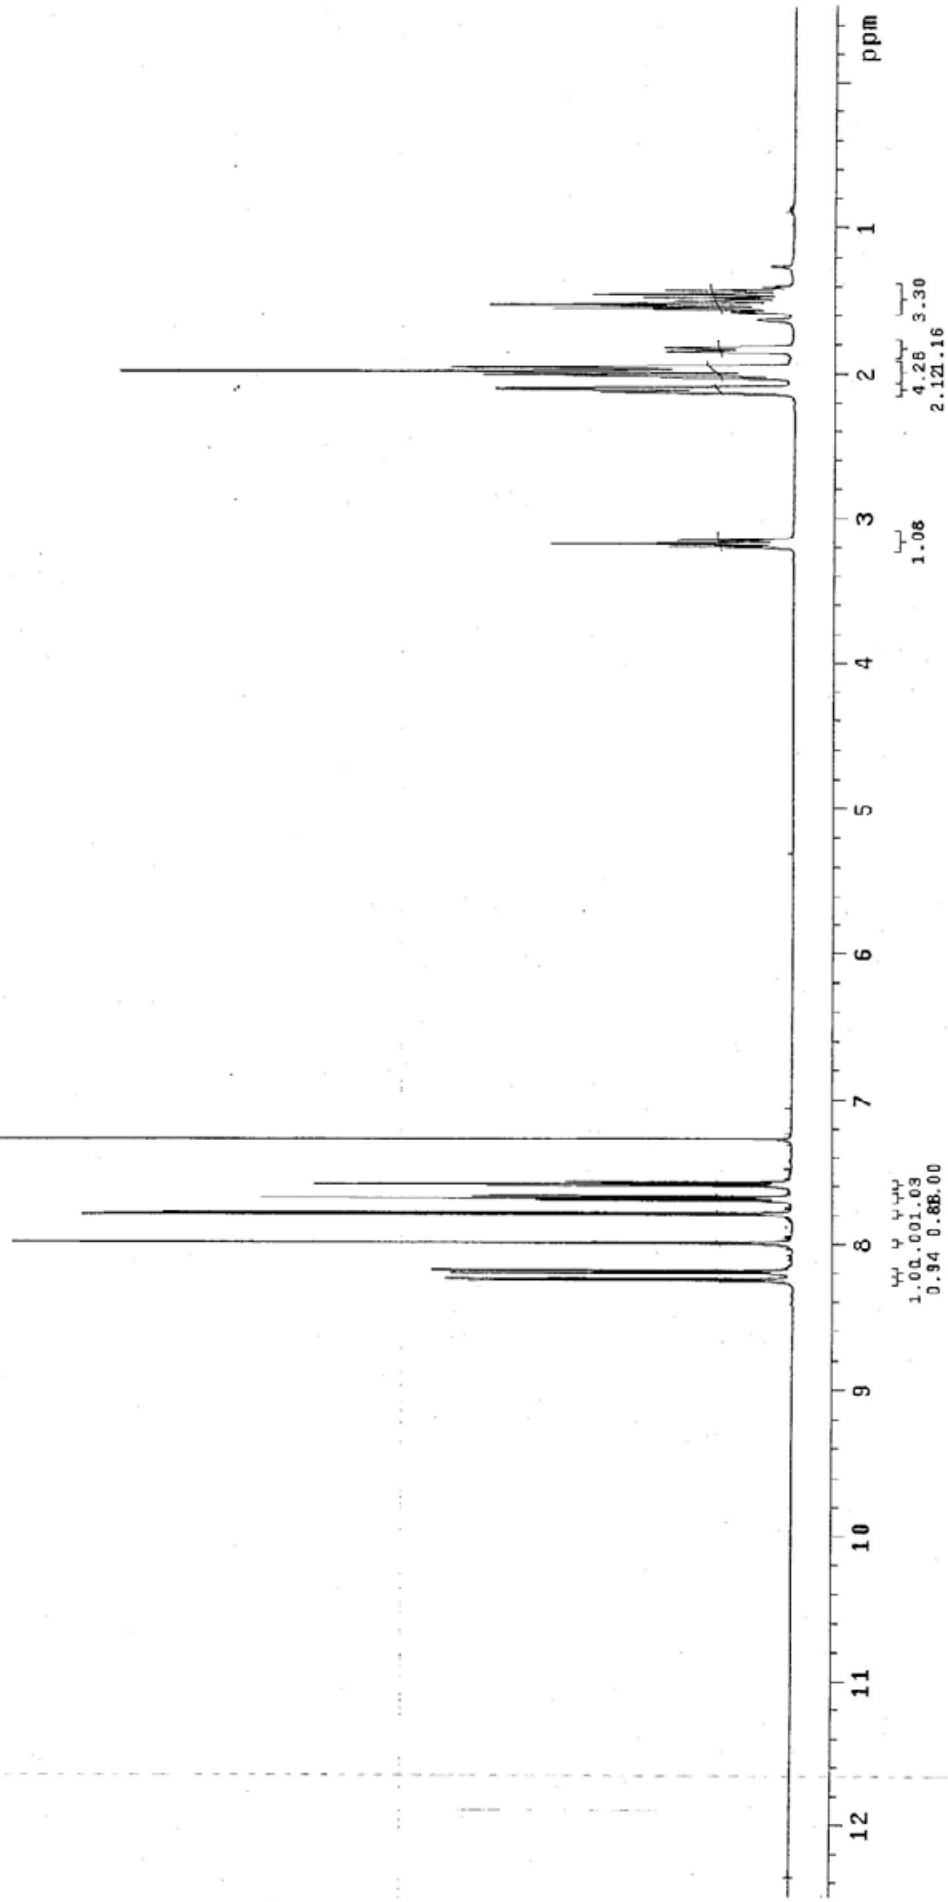

Solvent: CDCl<sub>3</sub>  
 Ambient temperature  
 User: 1-14-87  
 INOVA-500 "rocky"  
 PULSE SEQUENCE  
 Relax. delay 6.763 sec  
 Pulse 77.6 degrees  
 Acq. time 1.736 sec  
 Width 37735.8 Hz  
 88 repetitions  
 OBSERVE C13, 125.7632332 MHz  
 DECOUPLE H1, 500.2332753 MHz  
 Power 44 dB  
 continuously on  
 WALTZ-16 modulated  
 DATA PROCESSING  
 Line broadening 0.3 Hz  
 FT size 131072  
 Total time 3 minutes

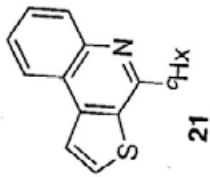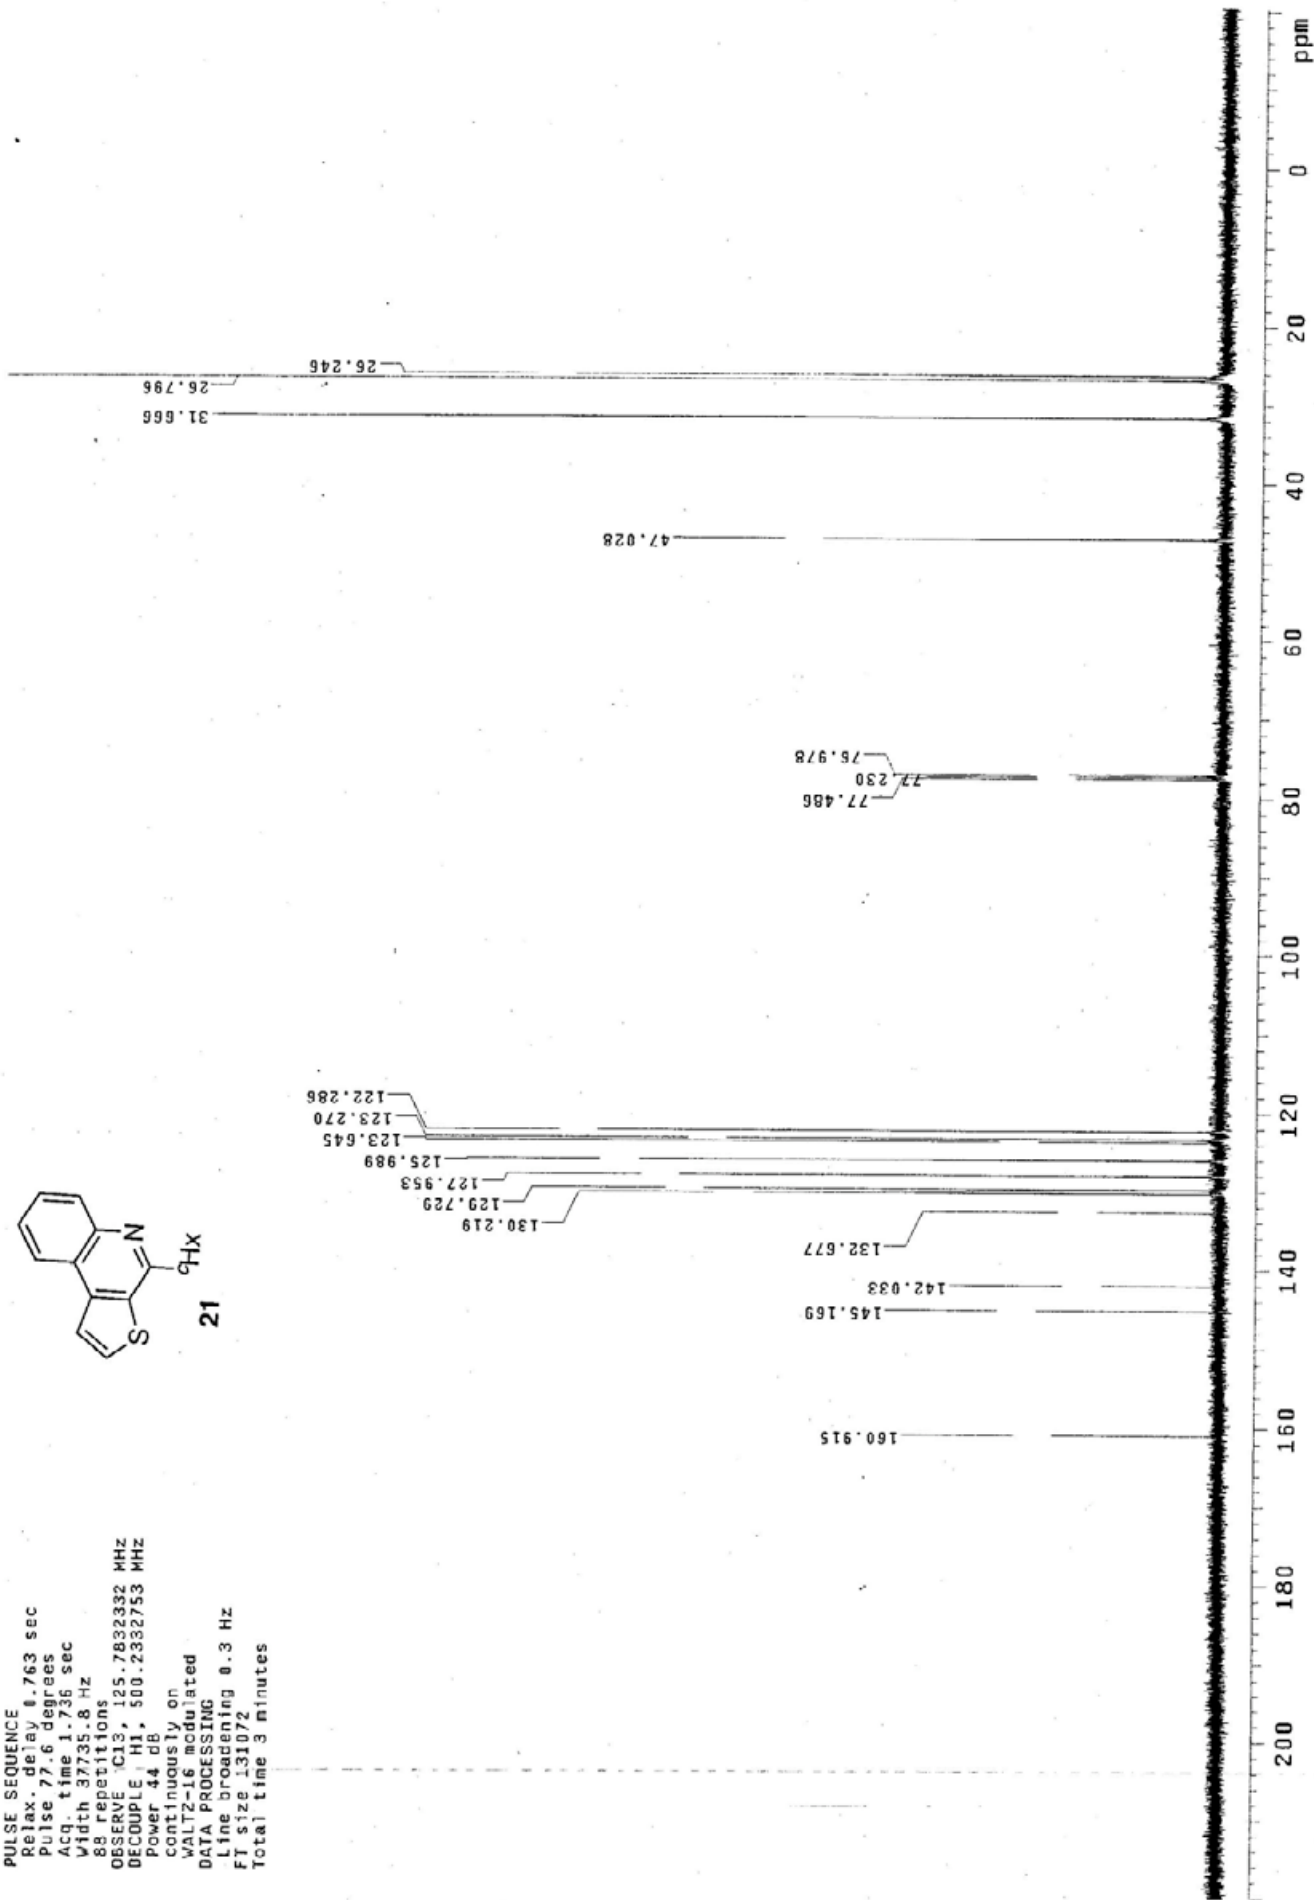

Pulse Sequence: s2pu1  
 Solvent: CDCl3  
 Ambient temperature  
 INOVA-500 "bullwinkle"  
 Relax. delay 5.000 sec  
 Pulse 94.4 degrees  
 Acq. time 3.001 sec  
 Width 10504.2 Hz  
 6 repetitions  
 OBSERVE: H1 499.7417205 MHz  
 DATA PROCESSING  
 FT size 262144  
 Total time 2 min, 8 sec

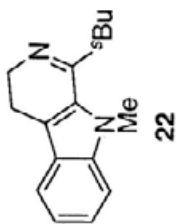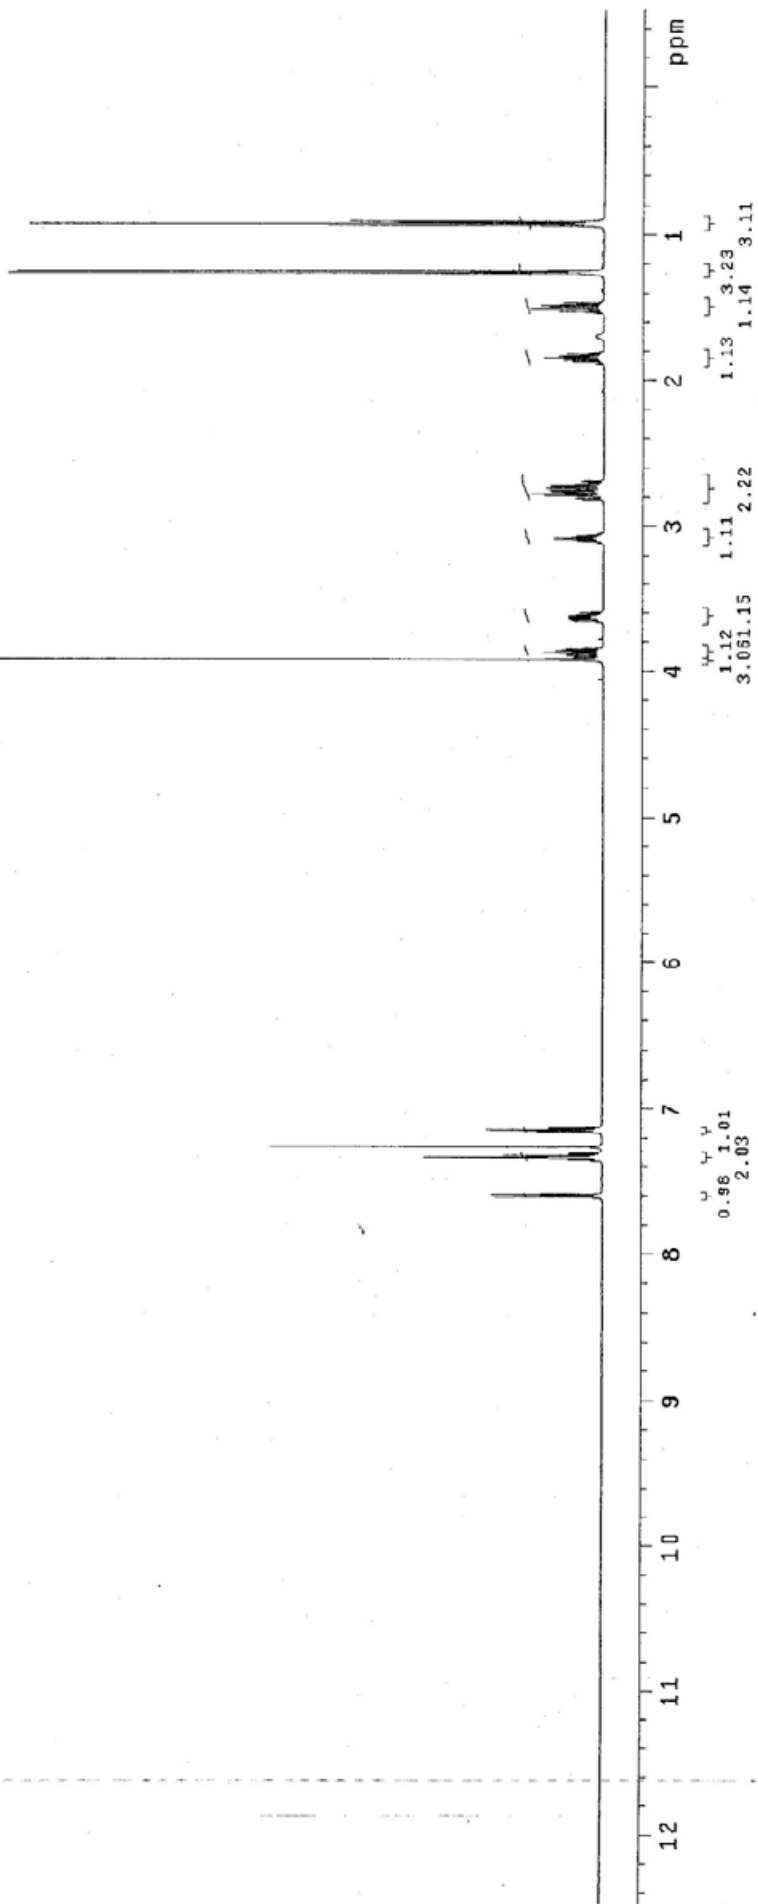



Solvent: CDC13  
 Ambient temperature  
 User: 1-14-87  
 INOVA-500 "rocky"  
 PULSE SEQUENCE  
 Relax. delay 0.763 sec  
 Pulse 69.0 degrees  
 Acq. time 1.736 sec  
 Width 37735.8 Hz  
 16 repetitions  
 OBSERVE C13, 125.7818690 MHz  
 DECOUPLE H1, 500.2278365 MHz  
 Power 37 dB  
 continuously on  
 WALTZ-16 modulated  
 DATA PROCESSING  
 Line broadening 0.3 Hz  
 FT size 131072  
 Total time 1 minute

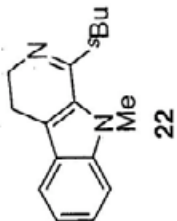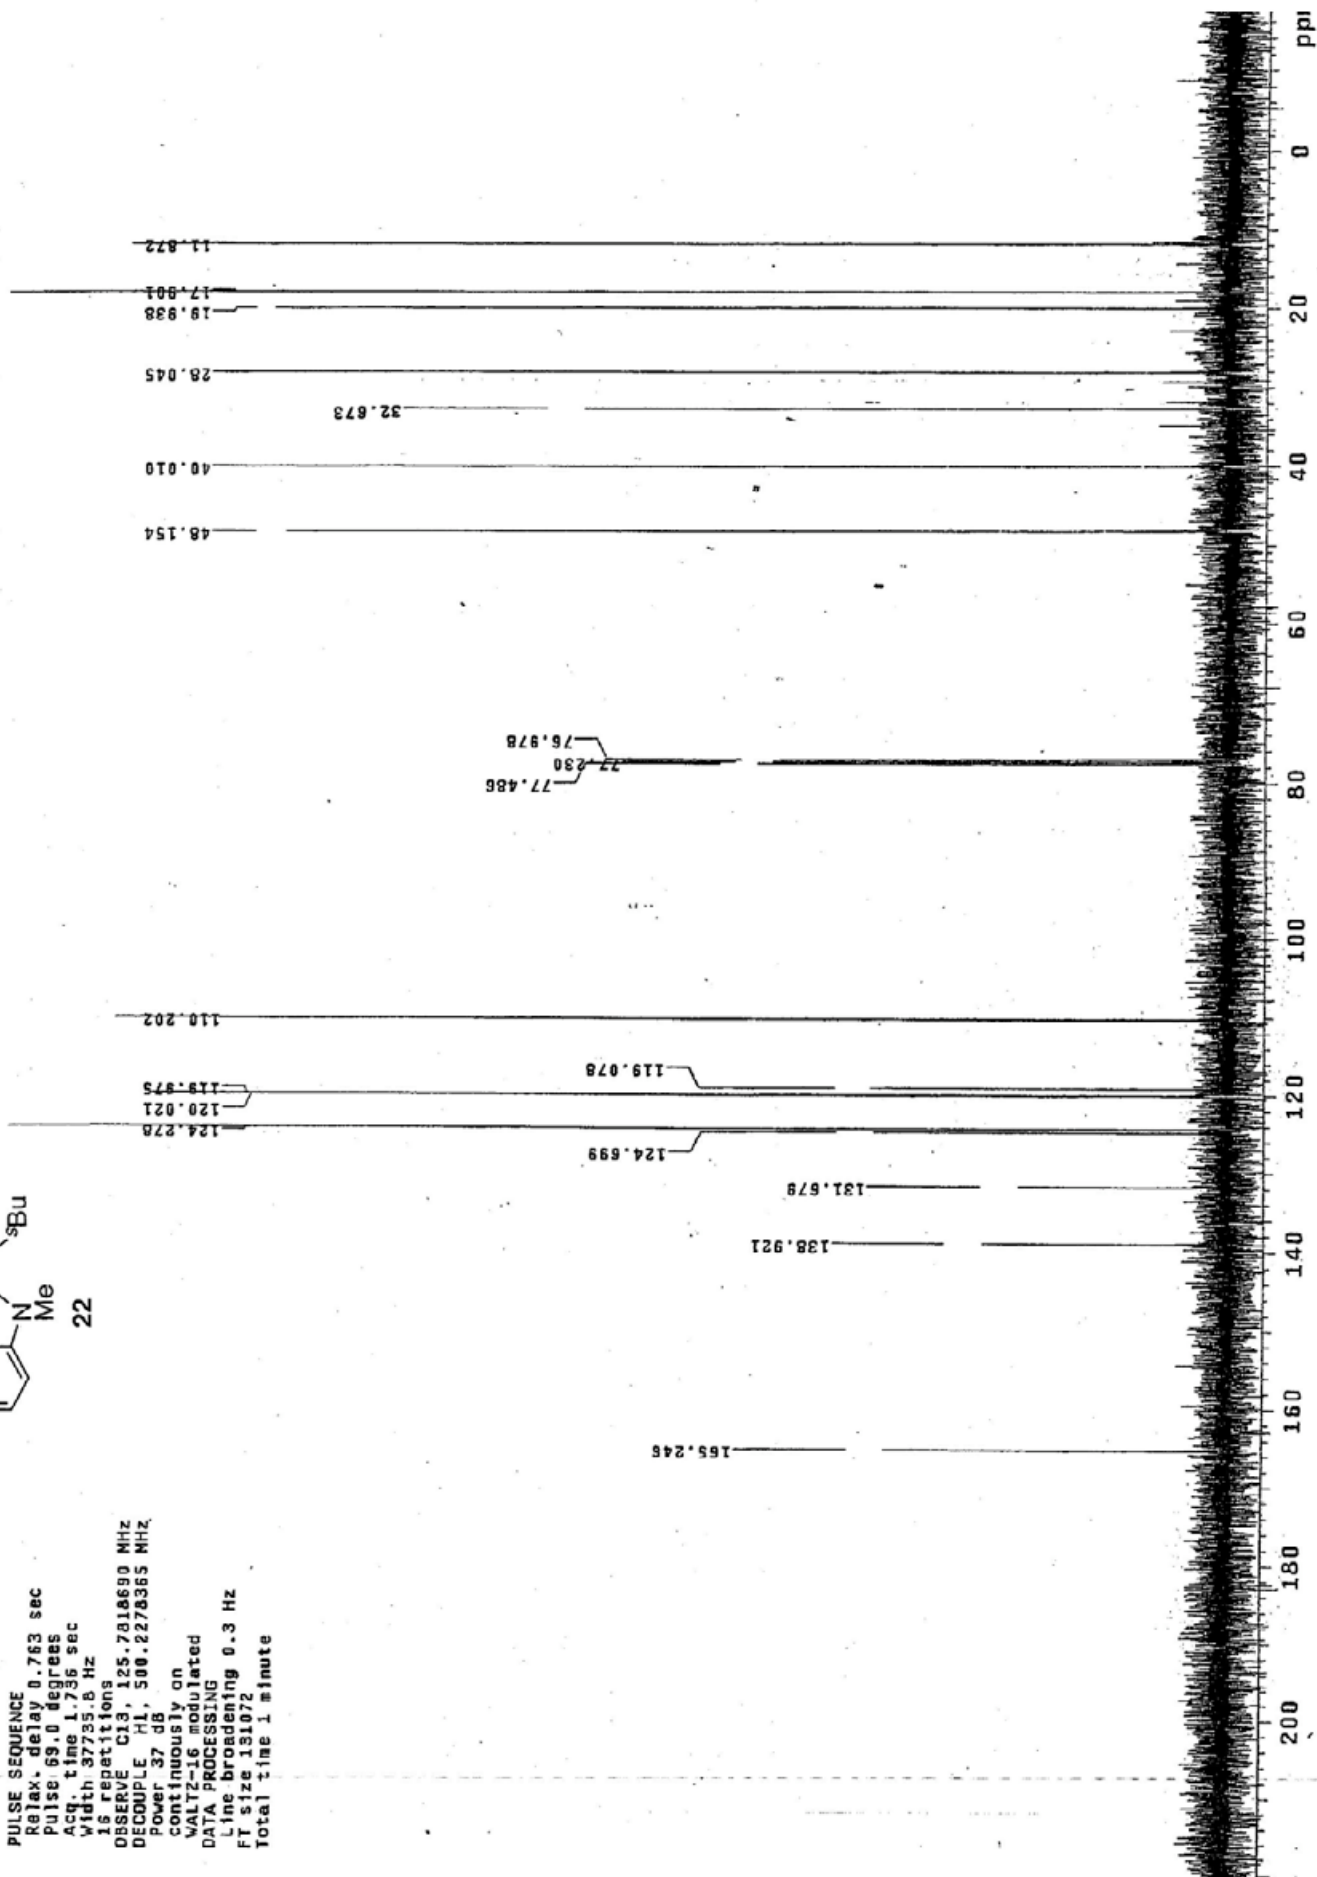

Pulse Sequence: s2pul  
 Solvent: CDCl3  
 Ambient temperature  
 INOVA-500 "bullwinkle"  
 Relax. delay 5.000 sec  
 Pulse 94.4 degrees  
 Acq. time 3.001 sec  
 Width 10504.2 Hz  
 9 repetitions  
 OBSERVE H1 499.7417206 MHz  
 DATA PROCESSING  
 FT size 262164  
 Total time 2 min, 8 sec

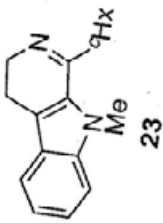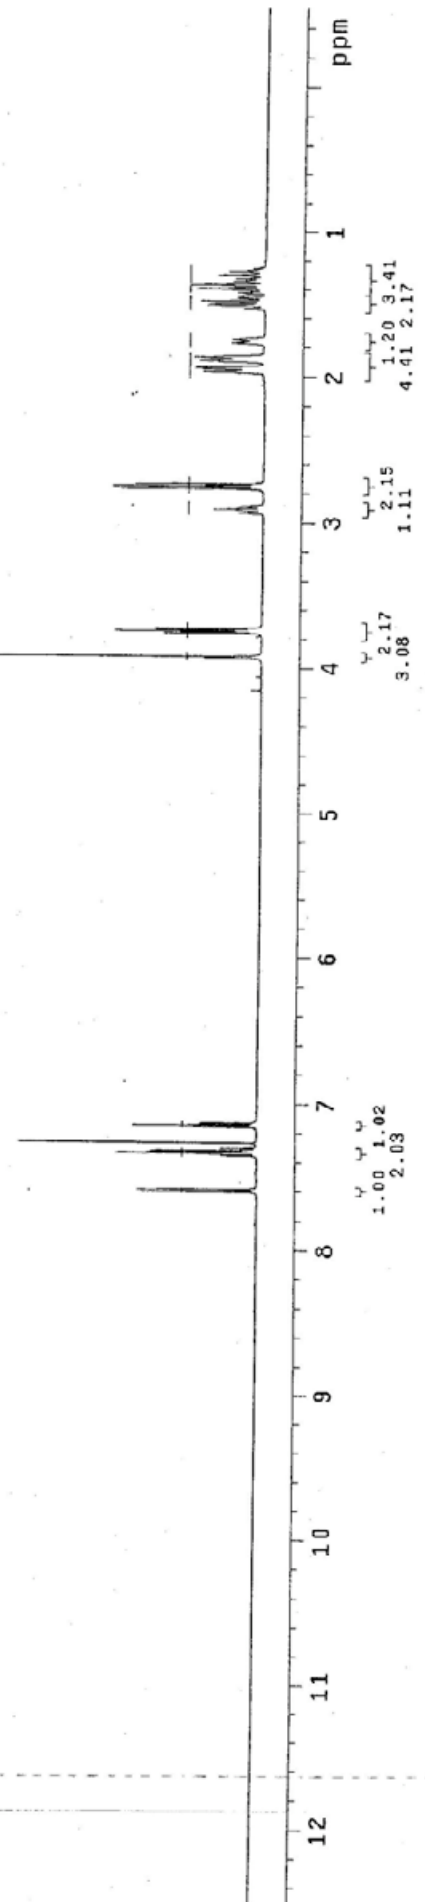

Solvent: CDCl3  
 Ambient temperature  
 User: 1-14-87  
 INOVA-500 "rocky"  
 PULSE SEQUENCE  
 Relax. delay 0.763 sec  
 Pulse 69.0 degrees  
 Acq. time 1.736 sec  
 Width 37735.8 Hz  
 88 repetitions  
 OBSERVE C13, 125.7822125 MHz  
 DECOUPLE H1, 500.2292208 MHz  
 Power 37 dB, continuously on  
 WALTZ-16 modulated  
 DATA PROCESSING  
 Line broadening 0.3 Hz  
 FI size 131072  
 Total time 3 minutes

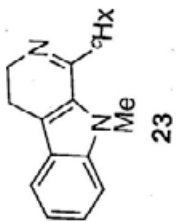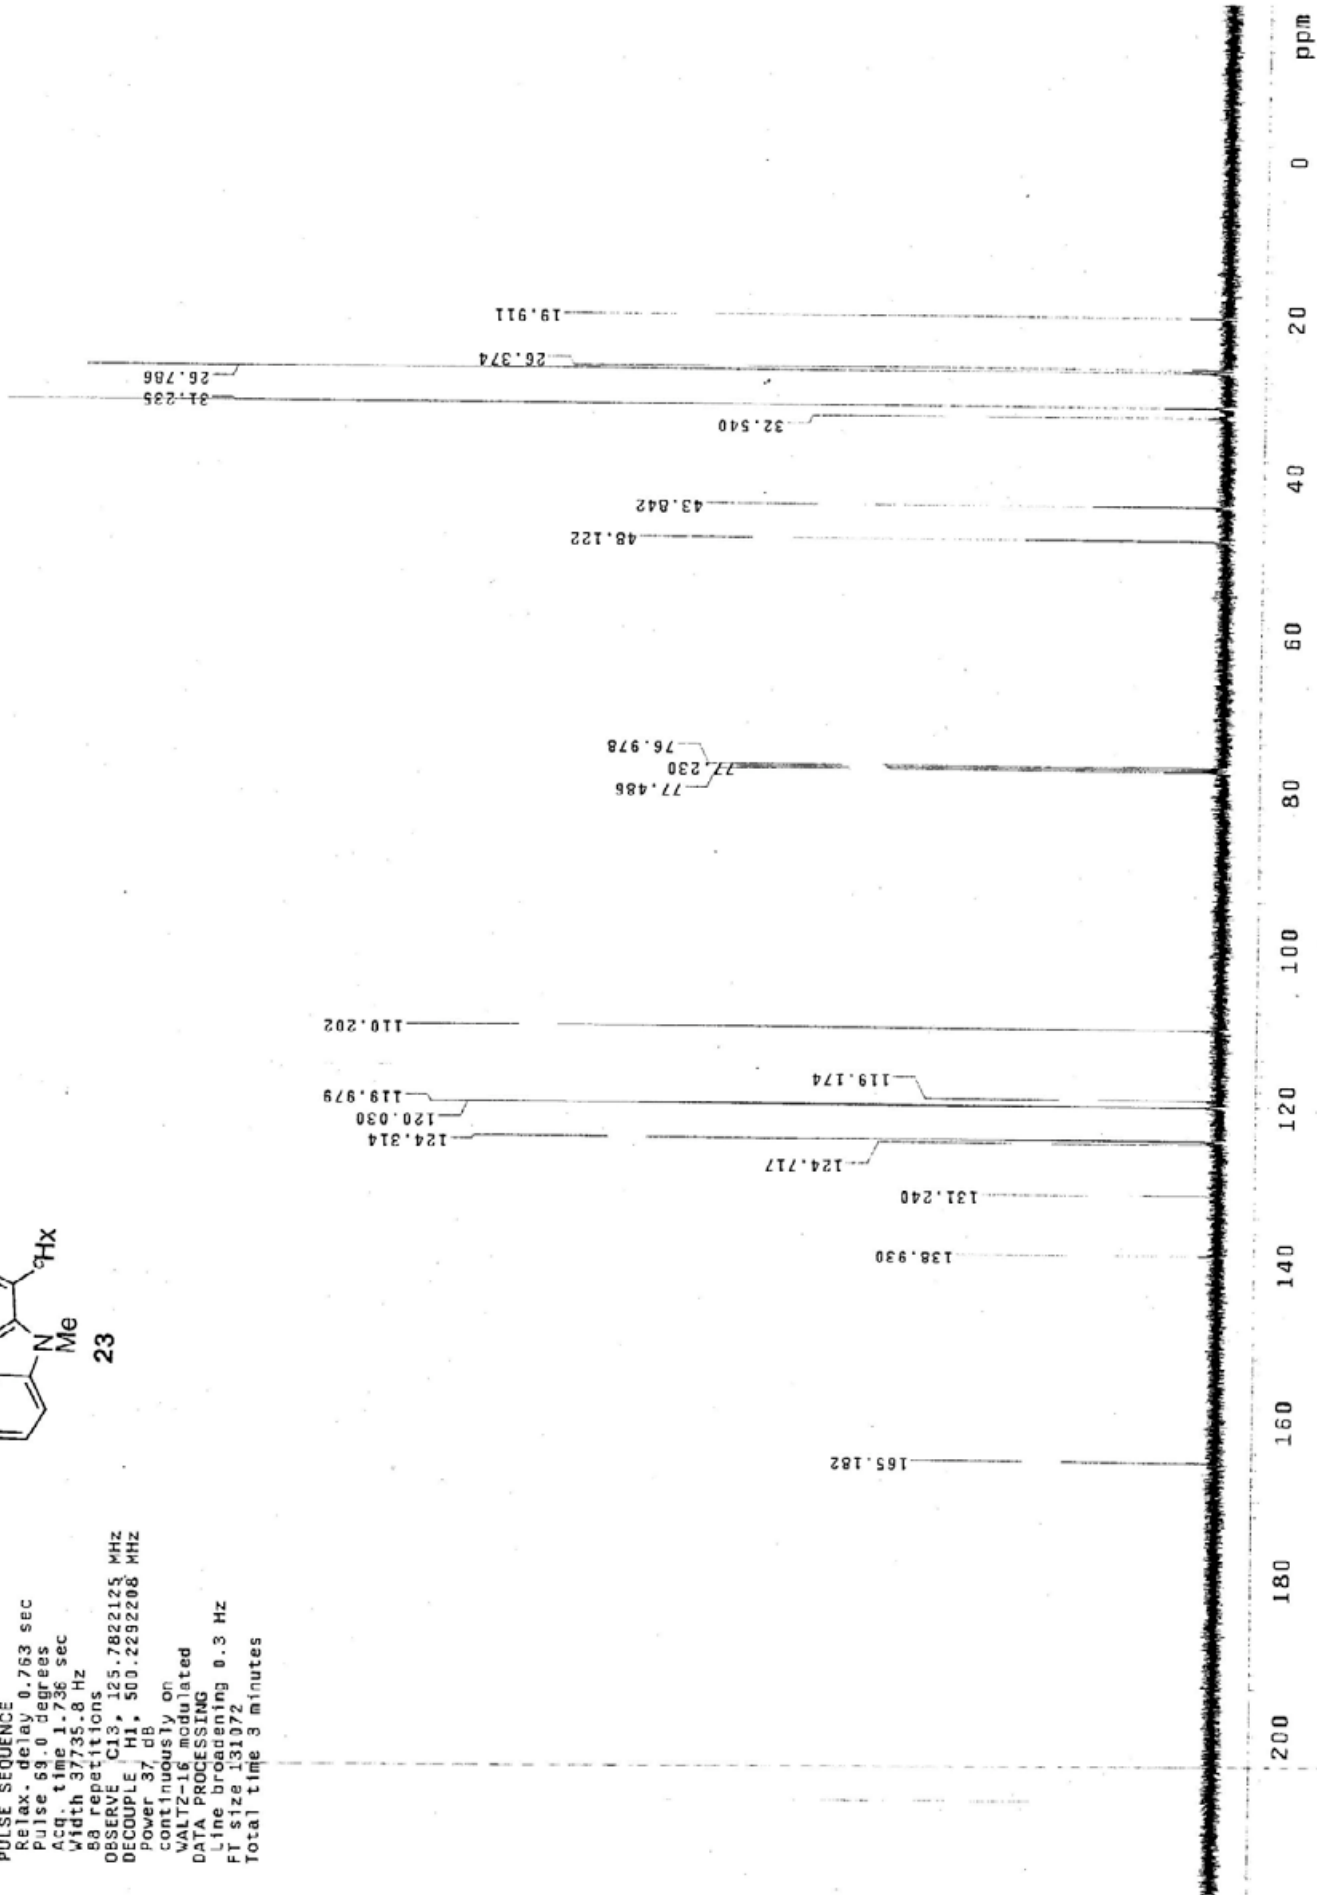

Pulse Sequence: s2pu1  
 Solvent: CDCl3  
 Ambient temperature  
 INOVA-500 "bullwinkle"  
 Relax. delay 5.000 sec  
 Pulse 94.4 degrees  
 Acq. time 3.001 sec  
 Width 10504.2 Hz  
 7 repetitions  
 OBSERVE H1, 489.7417206 MHz  
 DATA PROCESSING  
 FT size 262144  
 Total time 2 min, 8 sec

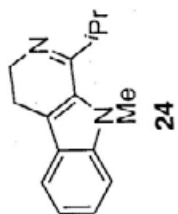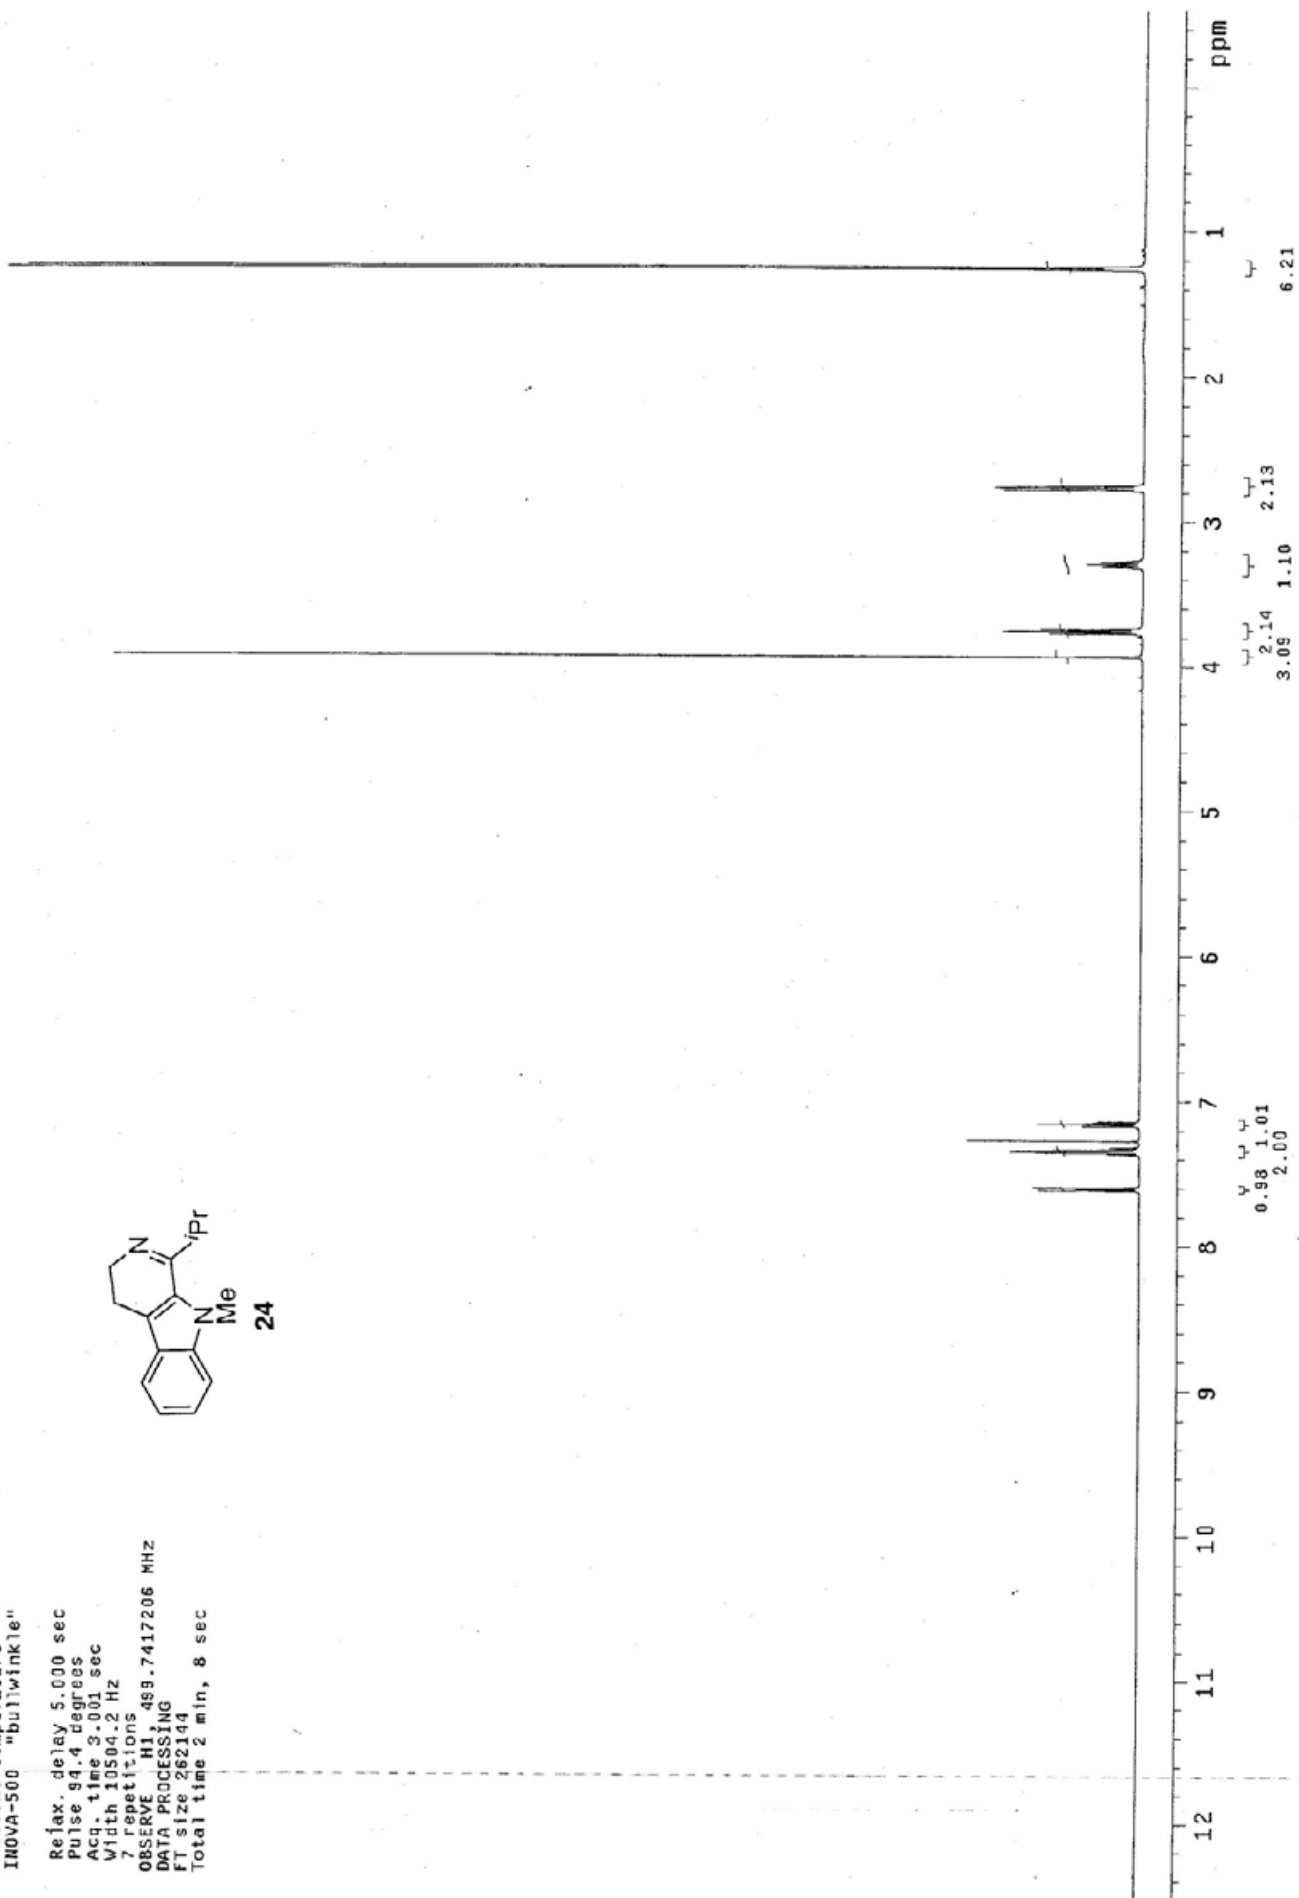

Solvent: CDCl<sub>3</sub>  
 Ambient temperature  
 User: 17-14-87  
 INOVA-500 "rocky"  
 PULSE SEQUENCE  
 Relax. delay 0.763 sec  
 Pulse 69.0 degrees  
 Acq. time 1.736 sec  
 Width 37735.8 Hz  
 120 repetitions  
 OBSERVE C13, 125.7622131 MHz  
 DECOUPLE H1, 500.2292208 MHz  
 Power 37 dB  
 continuously on  
 WALTZ-16 modulated  
 DATA PROCESSING  
 Line broadening 0.3 Hz  
 FT size 131072  
 Total time 5 minutes

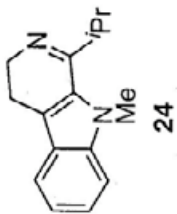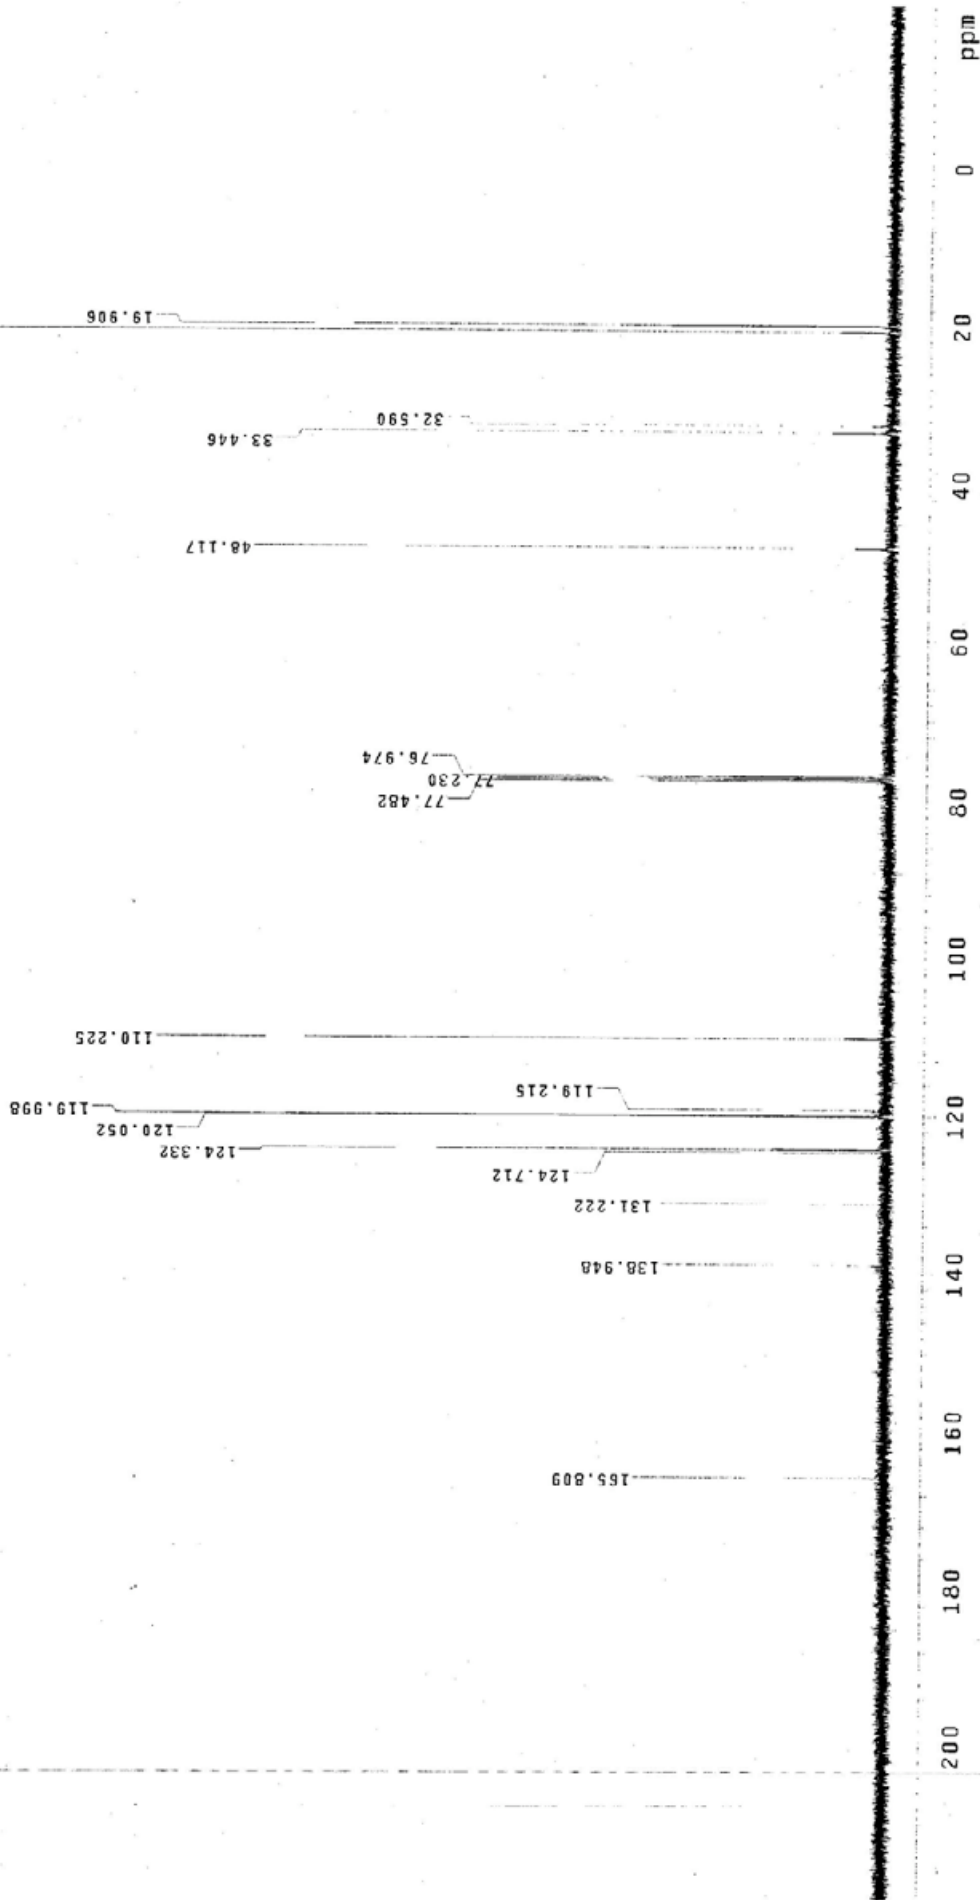

Pulse Sequence: s2pu1  
Solvent: CDC13  
Ambient temperature  
INOVA-500 "bullwinkle"  
Relax. delay 5.000 sec  
Pulse 89.0 degrees  
Acq. time 3.001 sec  
Width 10504.2 Hz  
& repetitions  
OBSERVE H1, 499.7417206 MHz  
DATA PROCESSING  
FT size 262144  
Total time 2 min, 8 sec

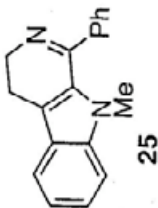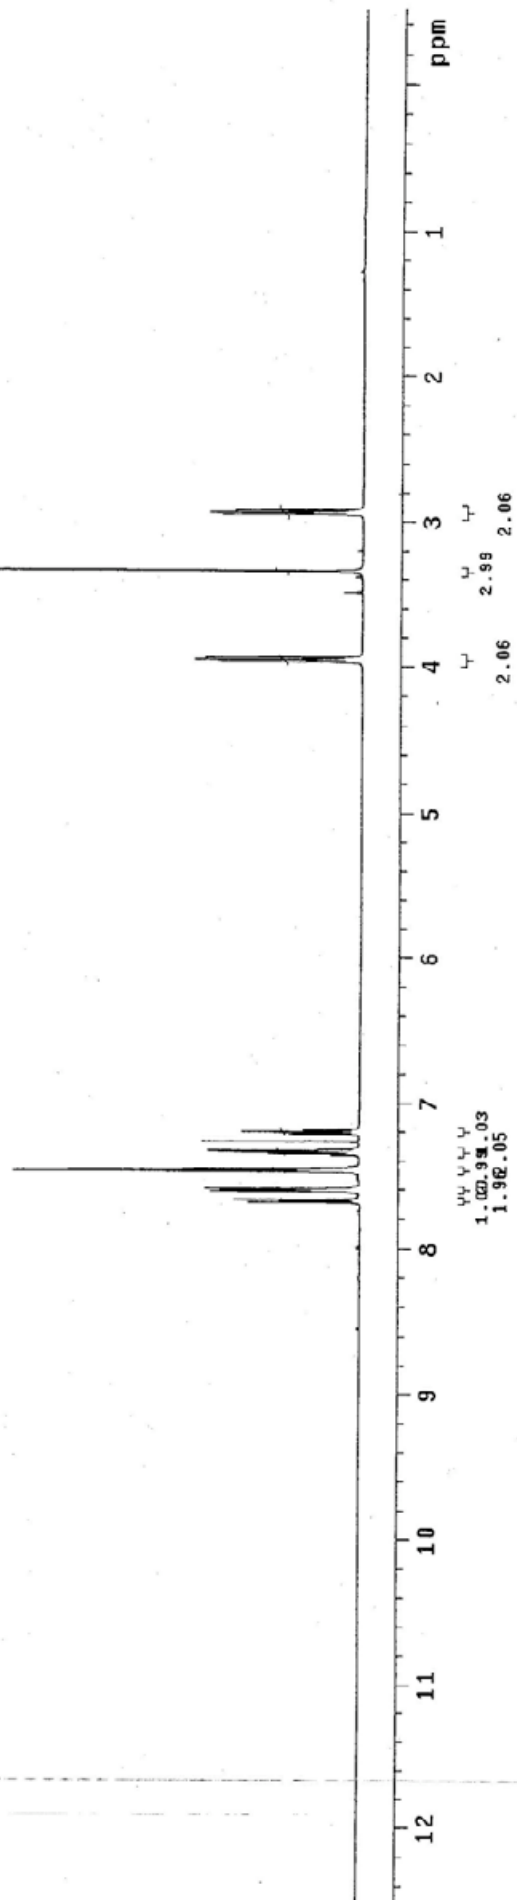

Solvent: CDCl3  
 Ambient temperature  
 User: 1-14-87  
 INOVA-500 "rocky"  
 PULSE SEQUENCE  
 Relax. delay 0.763 sec  
 Pulse 69.0 degrees  
 Acq. time 1.736 sec  
 Width 37735.8 Hz  
 100000000 repetitions  
 OBSERVE C13, 125.7832435 MHz  
 DECOUPLE H1, 500.2332753 MHz  
 Power 37 dB  
 continuously on  
 WALTZ-16 modulated  
 DATA PROCESSING  
 Line broadening 0.3 Hz  
 FT size 131072  
 Total time 694216.3 hours

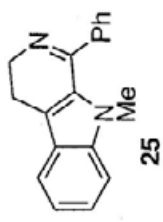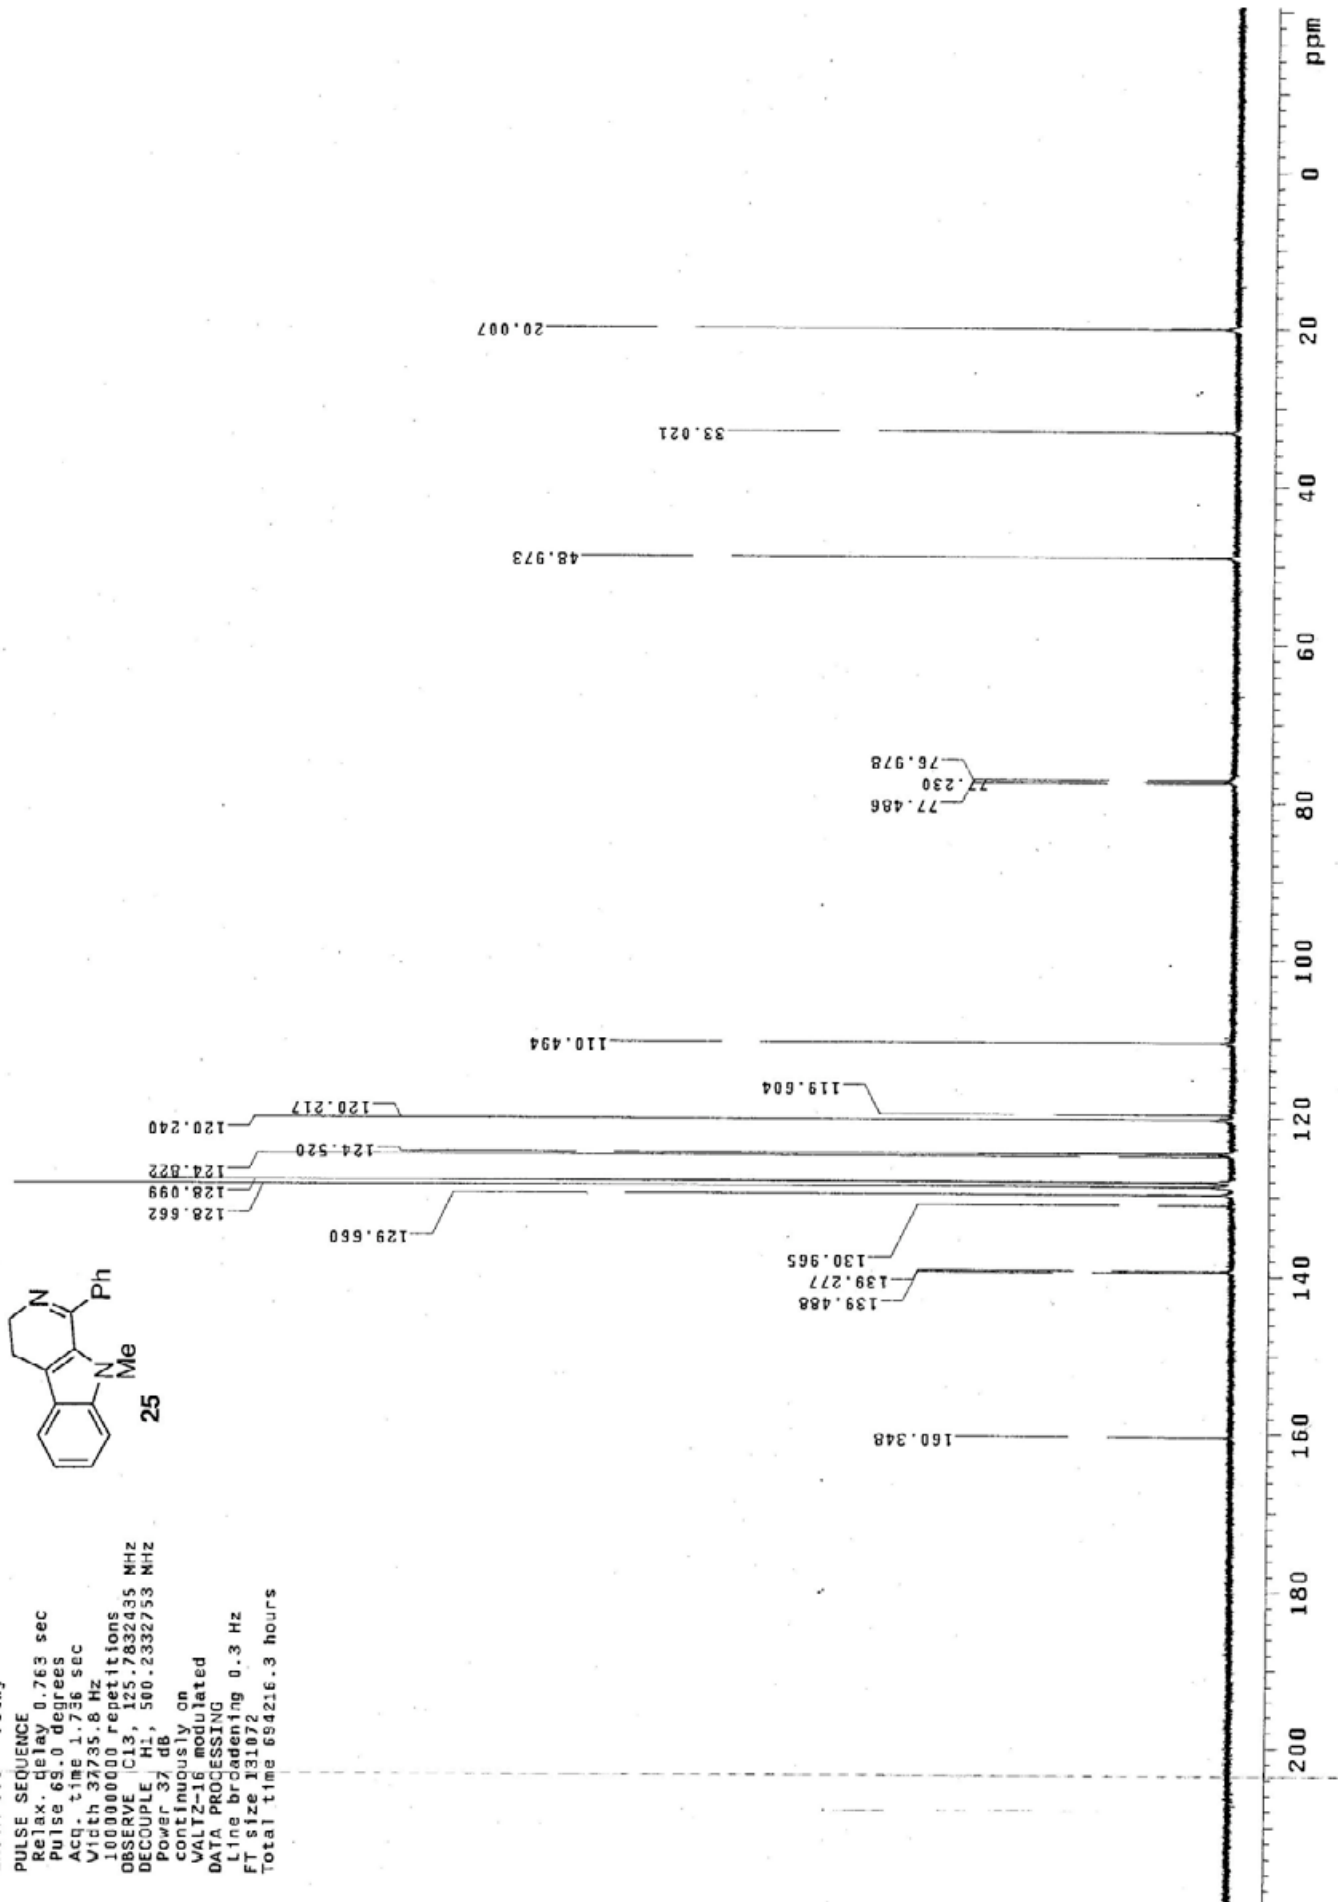

Pulse Sequence: s2pul  
 Solvent: CDCl3  
 Ambient temperature  
 INOVA-500 "Bullwinkle"  
 Relax. delay 5.000 sec  
 Pulse 94.4 degrees  
 Acq. time 3.001 sec  
 Width 10504.2 Hz  
 7 repetitions  
 OBSERVE H1, 499.7417206 MHz  
 DATA PROCESSING  
 FI size 26214q  
 Total time 2 min, 8 sec

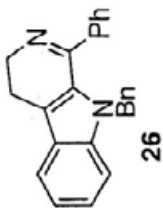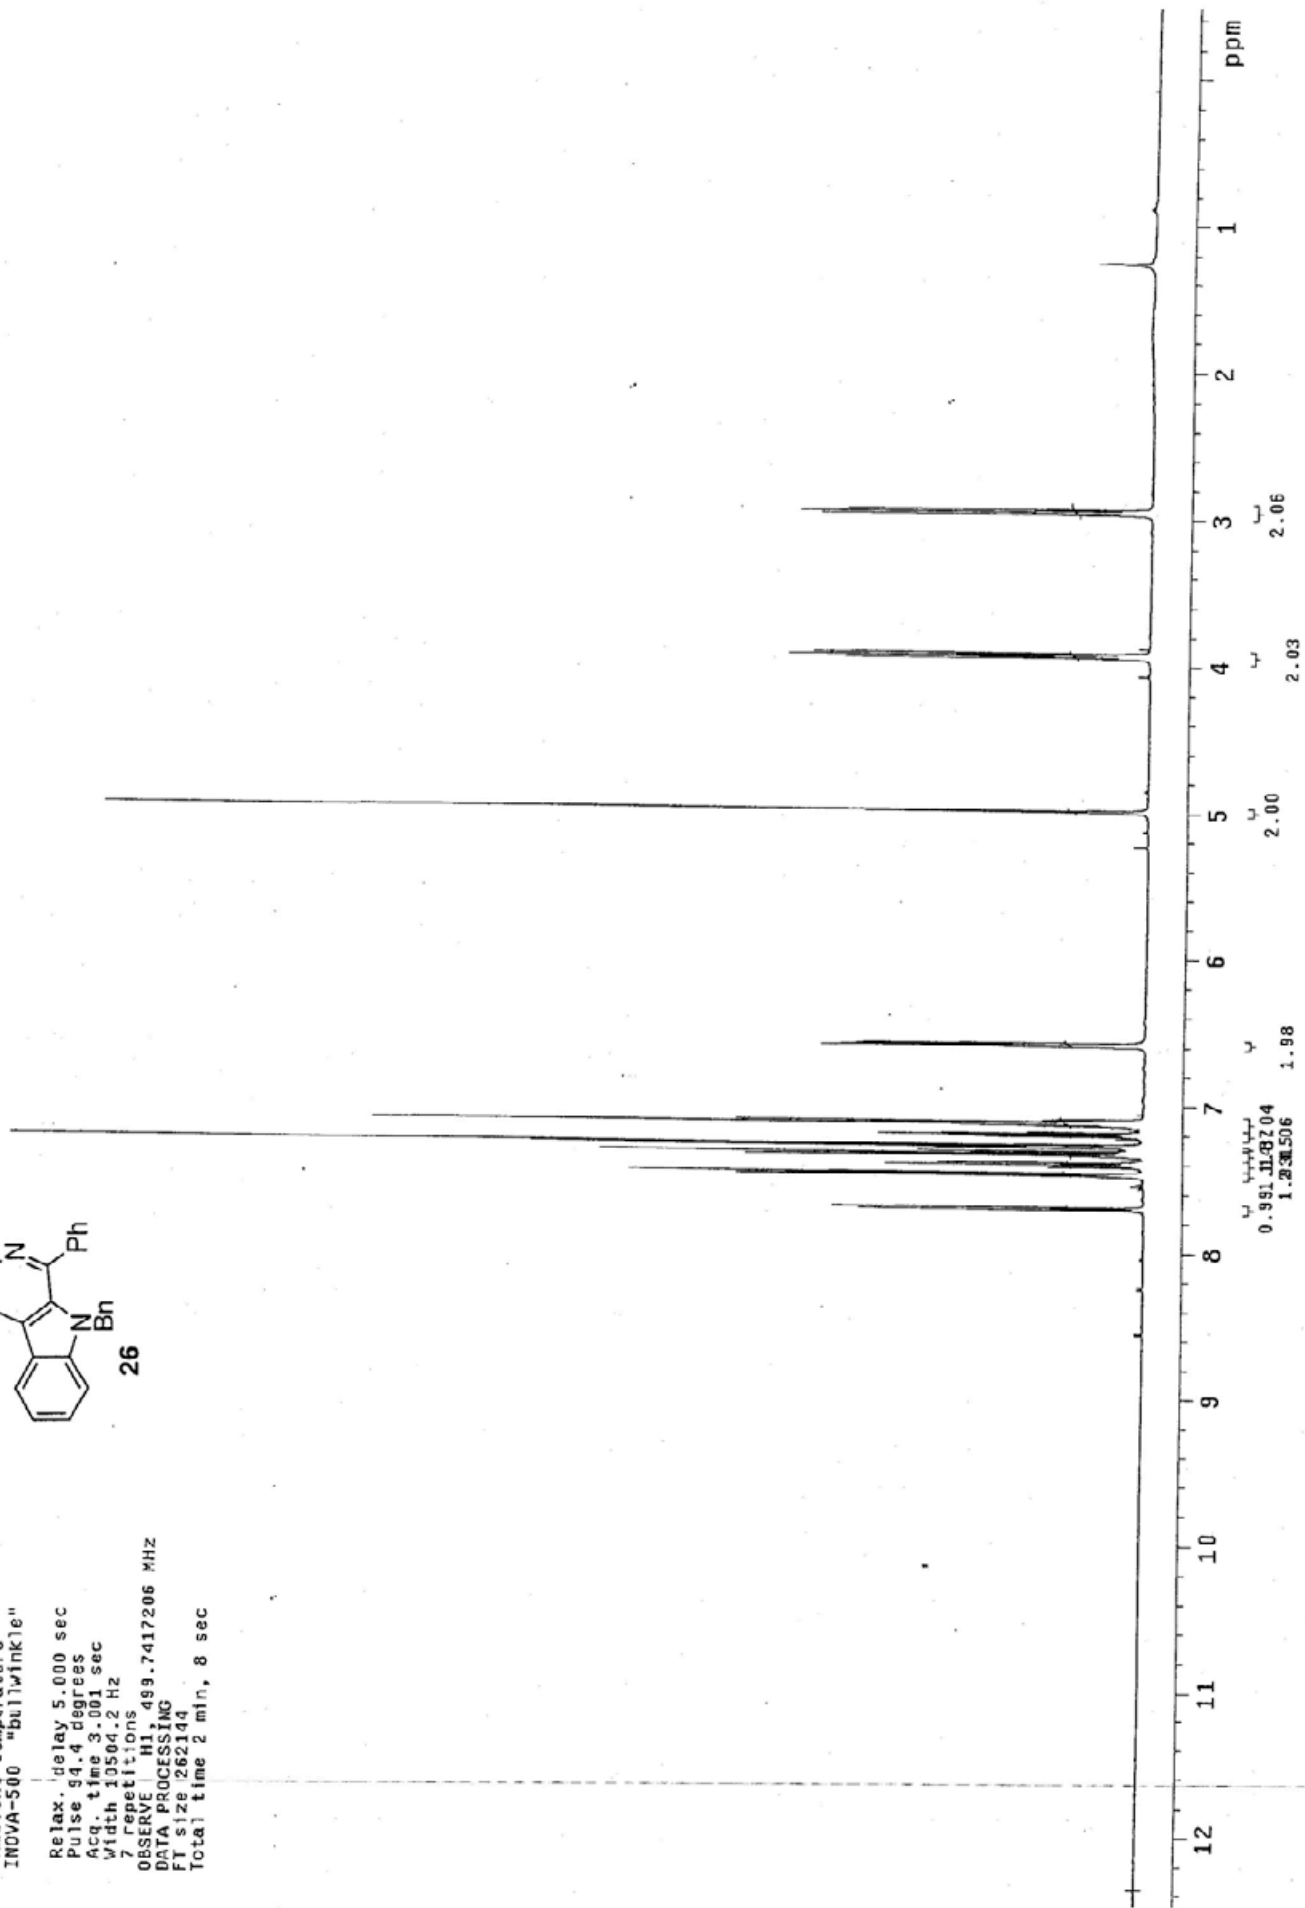



Solvent: CDCl3  
 Ambient temperature  
 User: 1-14-87  
 INOVA-90 "rocky"  
 PULSE SEQUENCE  
 Relax. delay 0.763 sec  
 Pulse 65.0 degrees  
 Acq. time 1.236 sec  
 Width 37735.8 Hz  
 80 repetitions  
 OBSERVE C13, 125.7822125 MHz  
 DECOUPLE H1, 500.2292208 MHz  
 Power 37 dB, 500.2292208 MHz  
 continuously on  
 WALTZ-16 modulated  
 DATA PROCESSING  
 Line broadening 0.3 Hz  
 FT size 131072  
 Total time 3 minutes

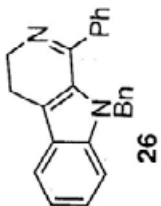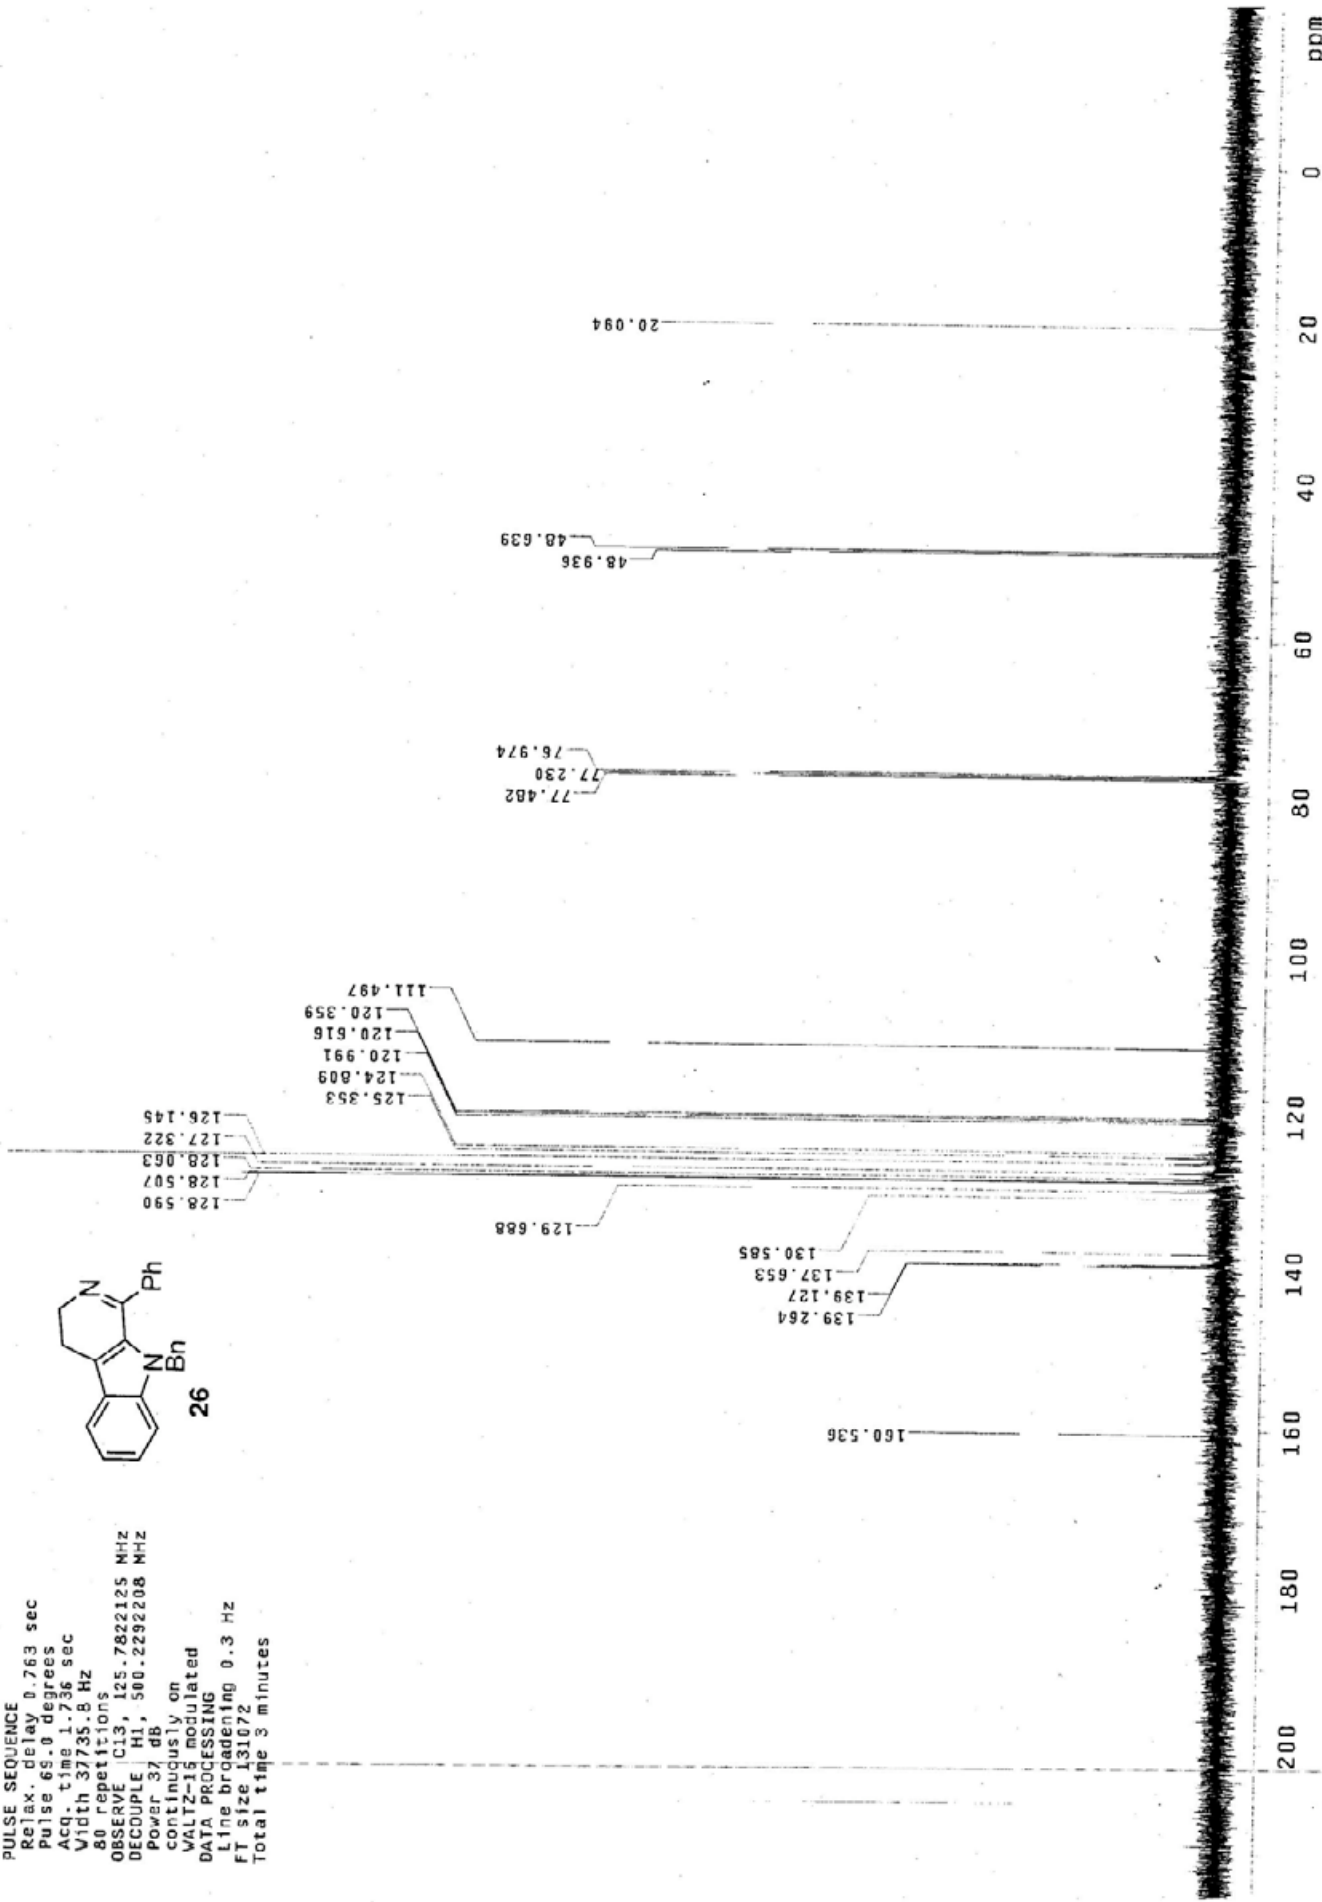

Pulse Sequence: s2pu1  
 Solvent: CDCl3  
 Ambient temperature  
 INOVA-500 "bullwinkle"  
 Relax. delay 5.000 sec  
 Pulse 59.1 degrees  
 Acq. time 3.001 sec  
 Width 10504.2 Hz  
 6 repetitions  
 OBSERVE H1, 499.7417206 MHZ  
 DATA PROCESSING  
 FI size 262144  
 Total time 2 min, 8 sec

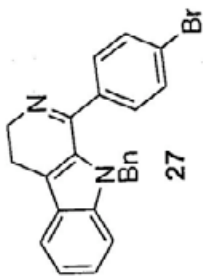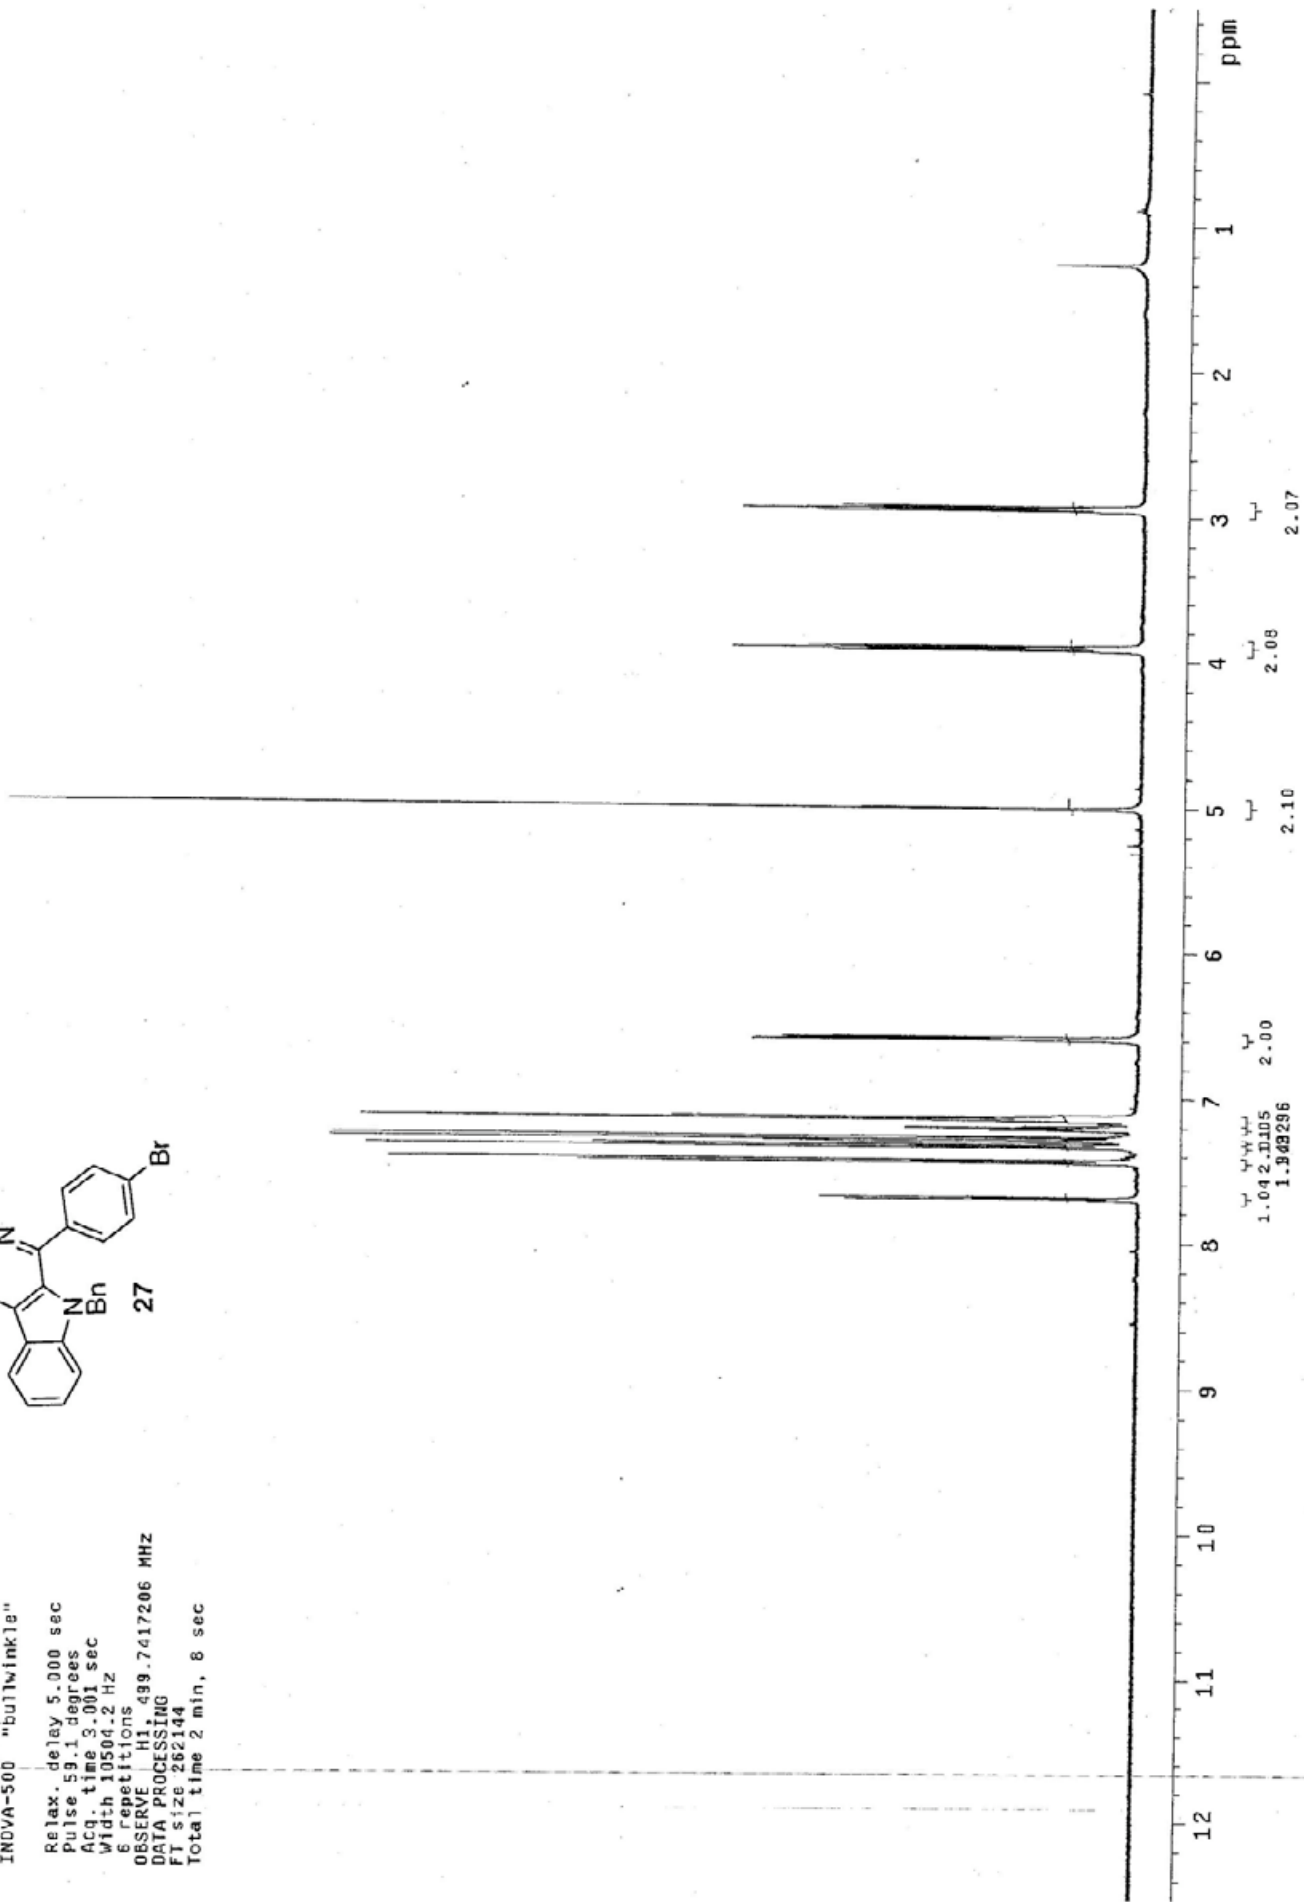

Pulse Sequence: s2pul  
 Solvent: CDC13  
 Ambient temperature  
 User: 1-14-87  
 INOVA-500 "bullwinkle"

Relax. delay 0.700 sec  
 Pulse 71.2 degrees  
 Acq. time 2.000 sec  
 Width 31397.2 Hz  
 88 repetitions  
 OBSERVE C13, 125.6601328 MHz  
 DECOUPLE H1, 499.7442194 MHz  
 Power 41 dB  
 continuously on  
 WALTZ-16 modulated  
 DATA PROCESSING  
 Line broadening 1.0 Hz  
 FT size 131072  
 Total time 75247 hr, 6 min, 8 sec

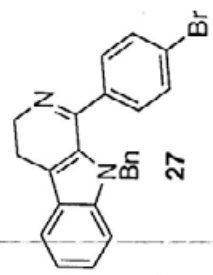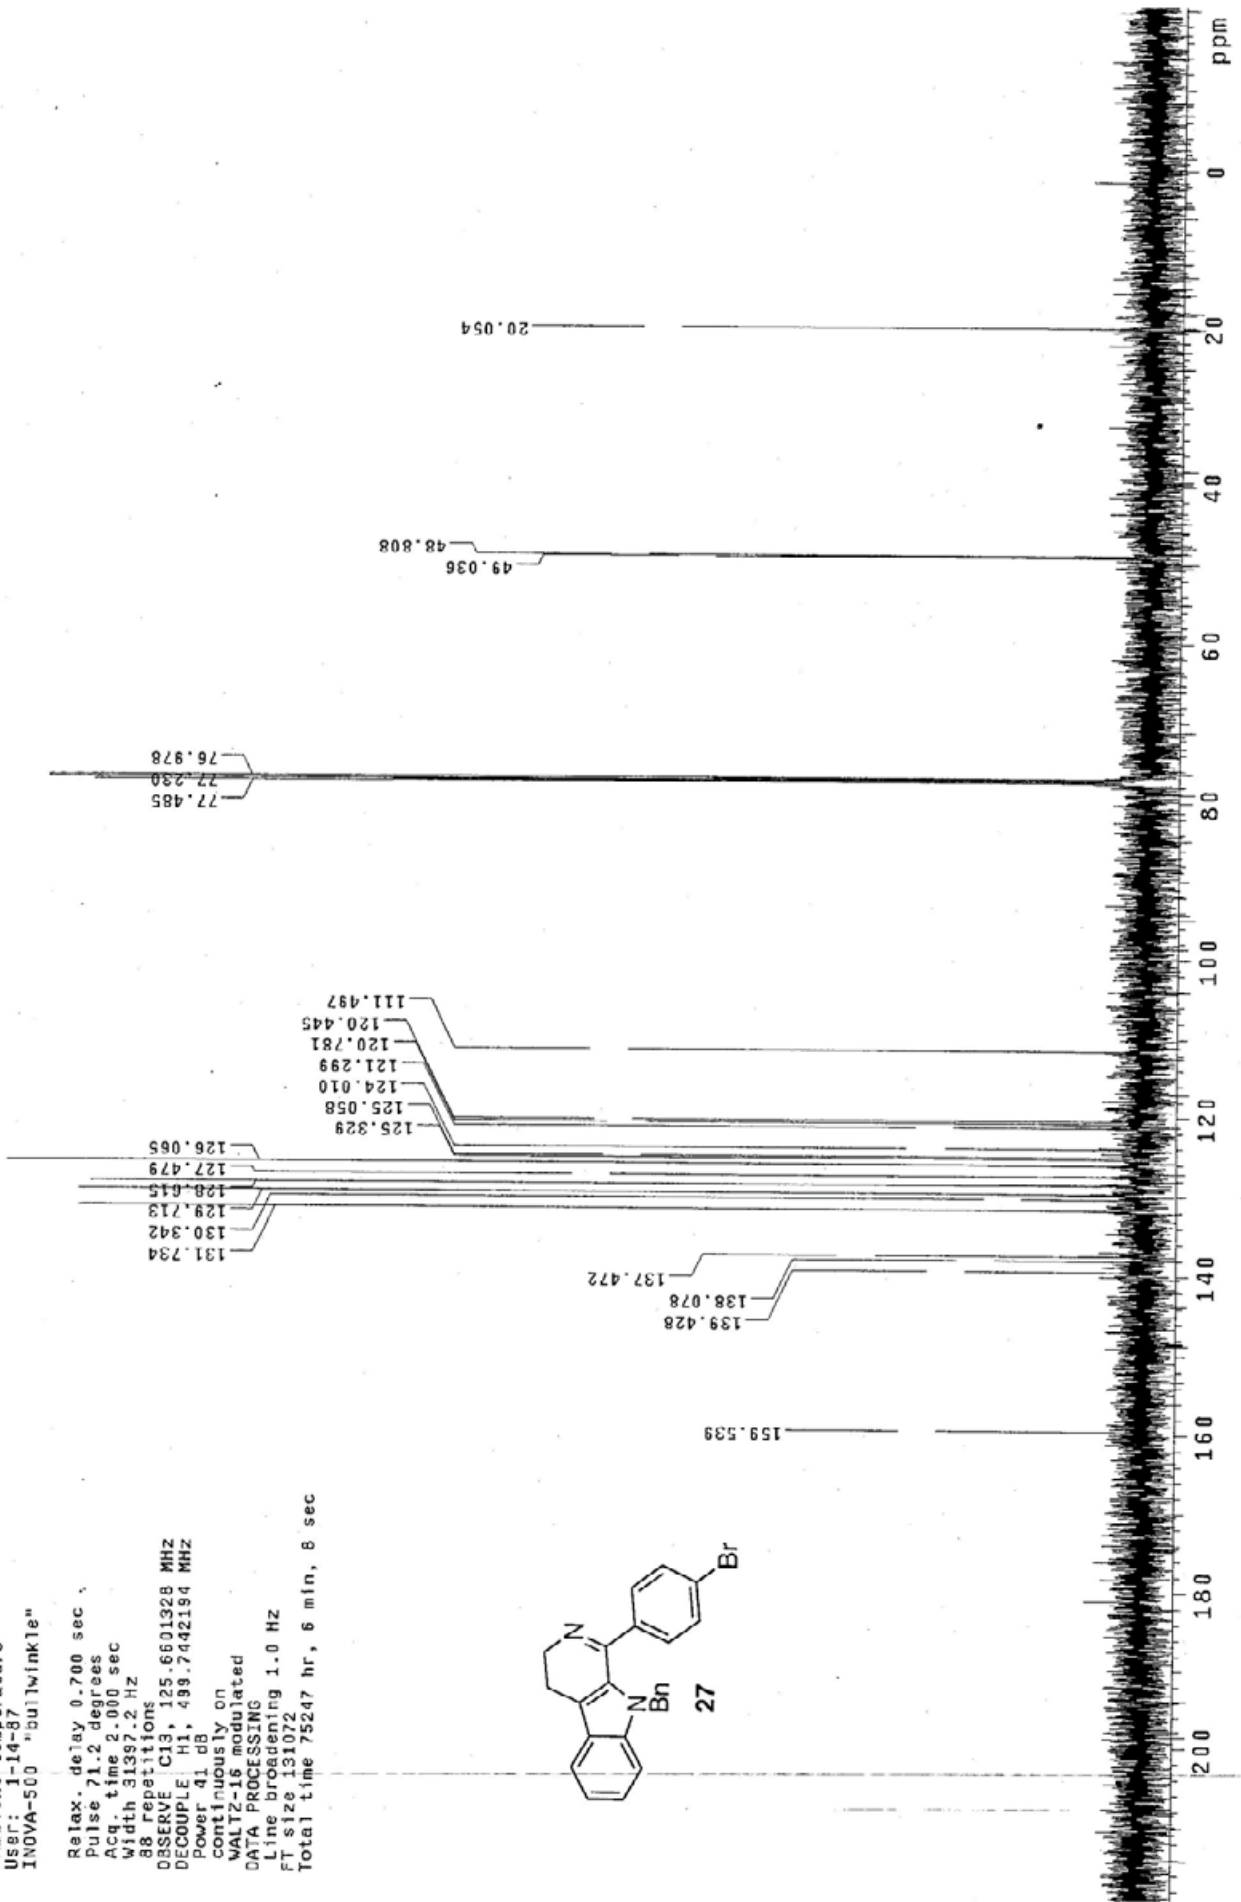

Pulse Sequence: s2pu1  
Solvent: CDCl3  
Ambient temperature  
INOVA-500 "Casper"

Relax. delay 5.000 sec  
Pulse 78.7 degrees  
Acq time 4.399 sec  
Width 12012.0 Hz  
6 repetitions

OBSERVE F1, 500.4294975 MHz  
DATA PROCESSING  
F1 size 262144  
Total time 2 min, 40 sec

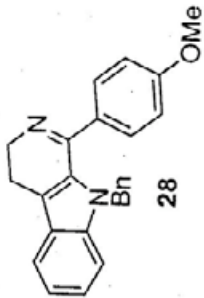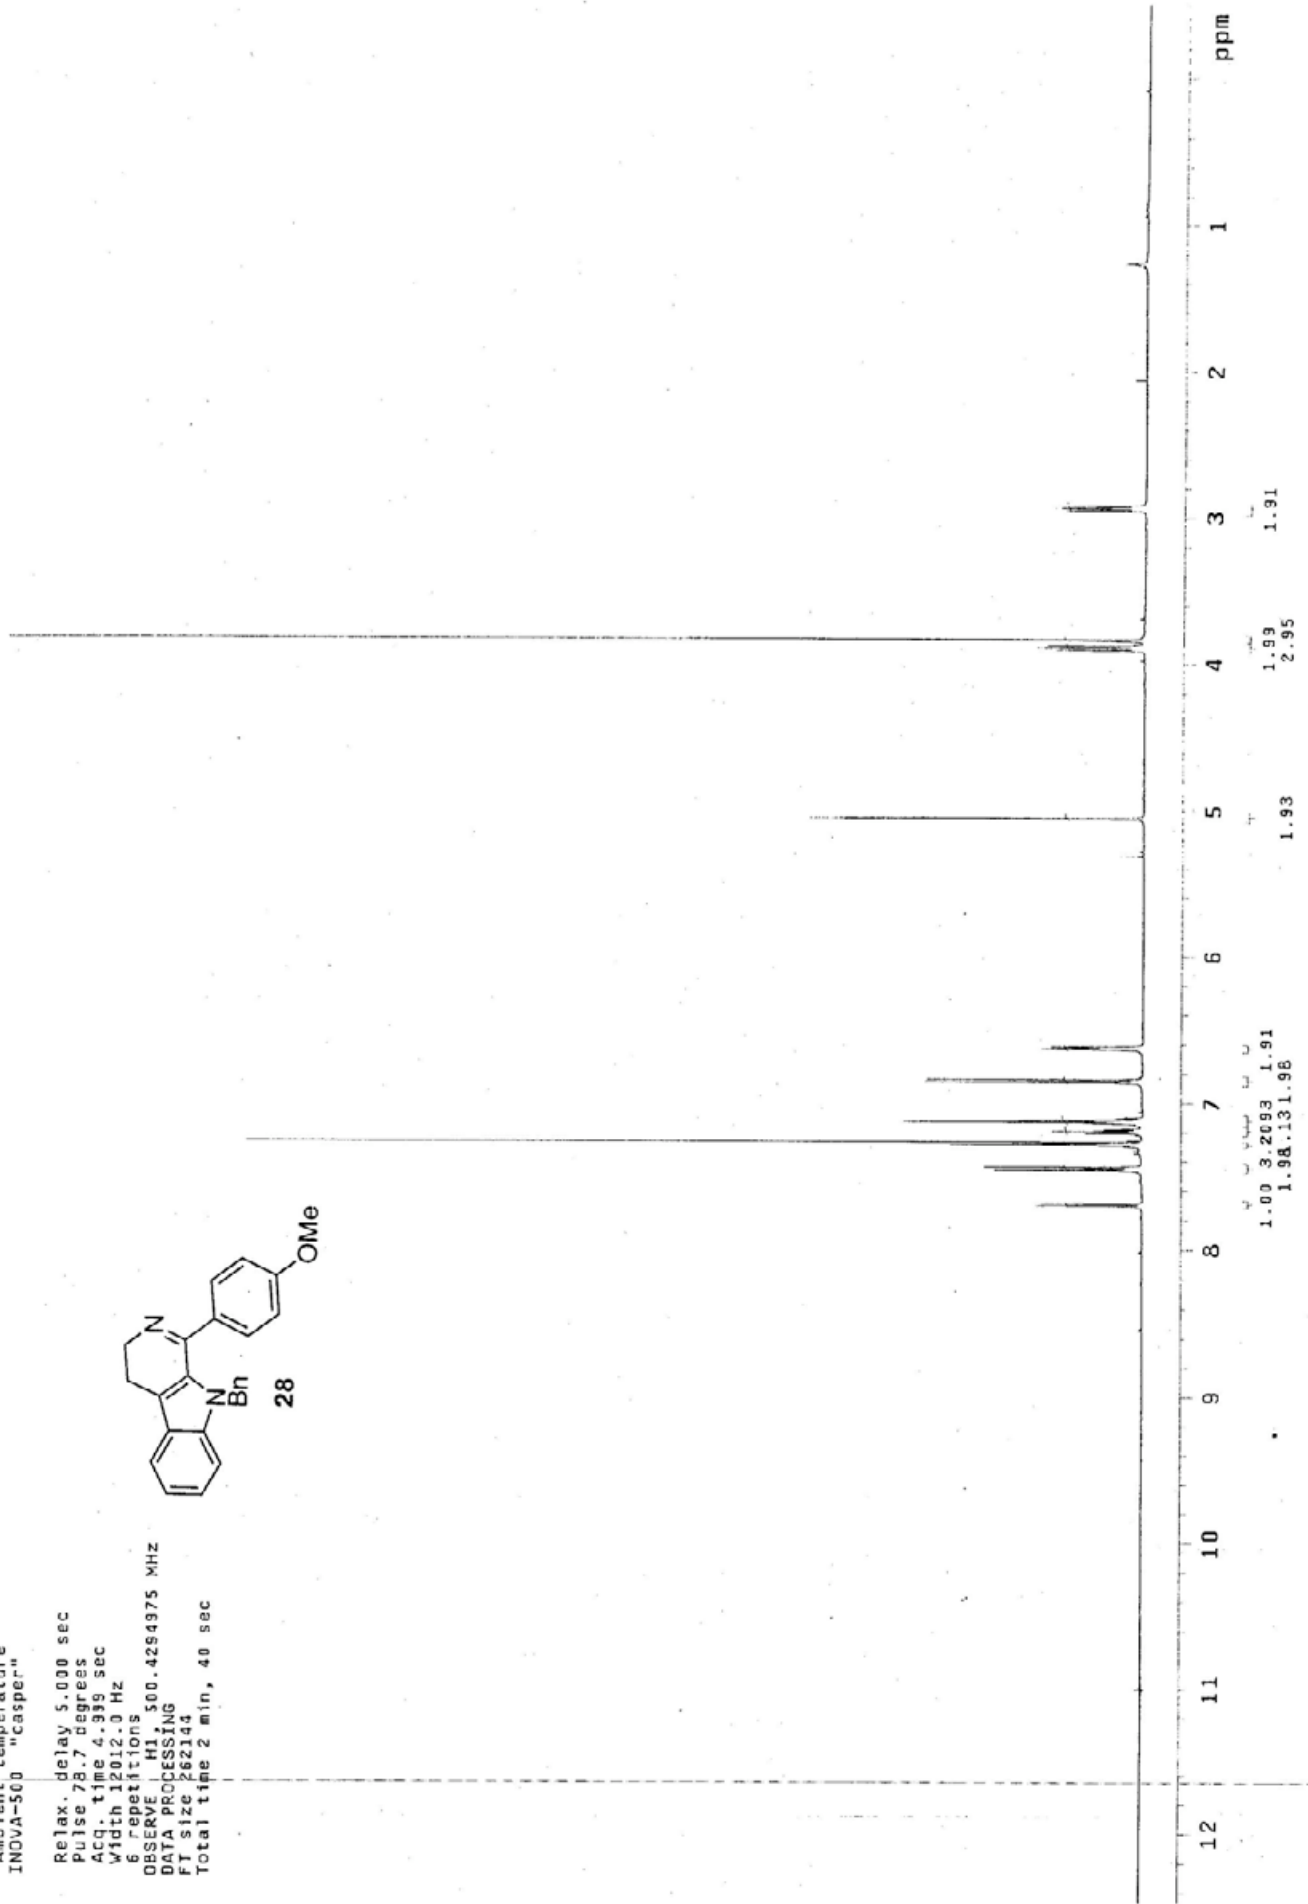

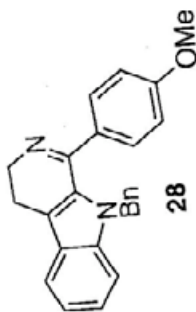

Pulse Sequence: s2pu1  
 Solvent: CDCl3  
 Ambient temperature  
 User: 1-14-87  
 INOVA-500 "bullwinkle"

Relax. delay 0.750 sec  
 pulse 71.2 degrees  
 Acq. time 2.000 sec  
 Width 31387.2 Hz  
 200 repetitions  
 OBSERVE C13, 125.6601338 MHz  
 DECOUPLE H1, 499.7442194 MHz  
 Power 41 dB  
 continuously on  
 WALTZ-16 modulated  
 DATA PROCESSING  
 Line broadening 1.0 Hz  
 FT size 131072  
 Total time 7563 hr, 35 min, 56 sec

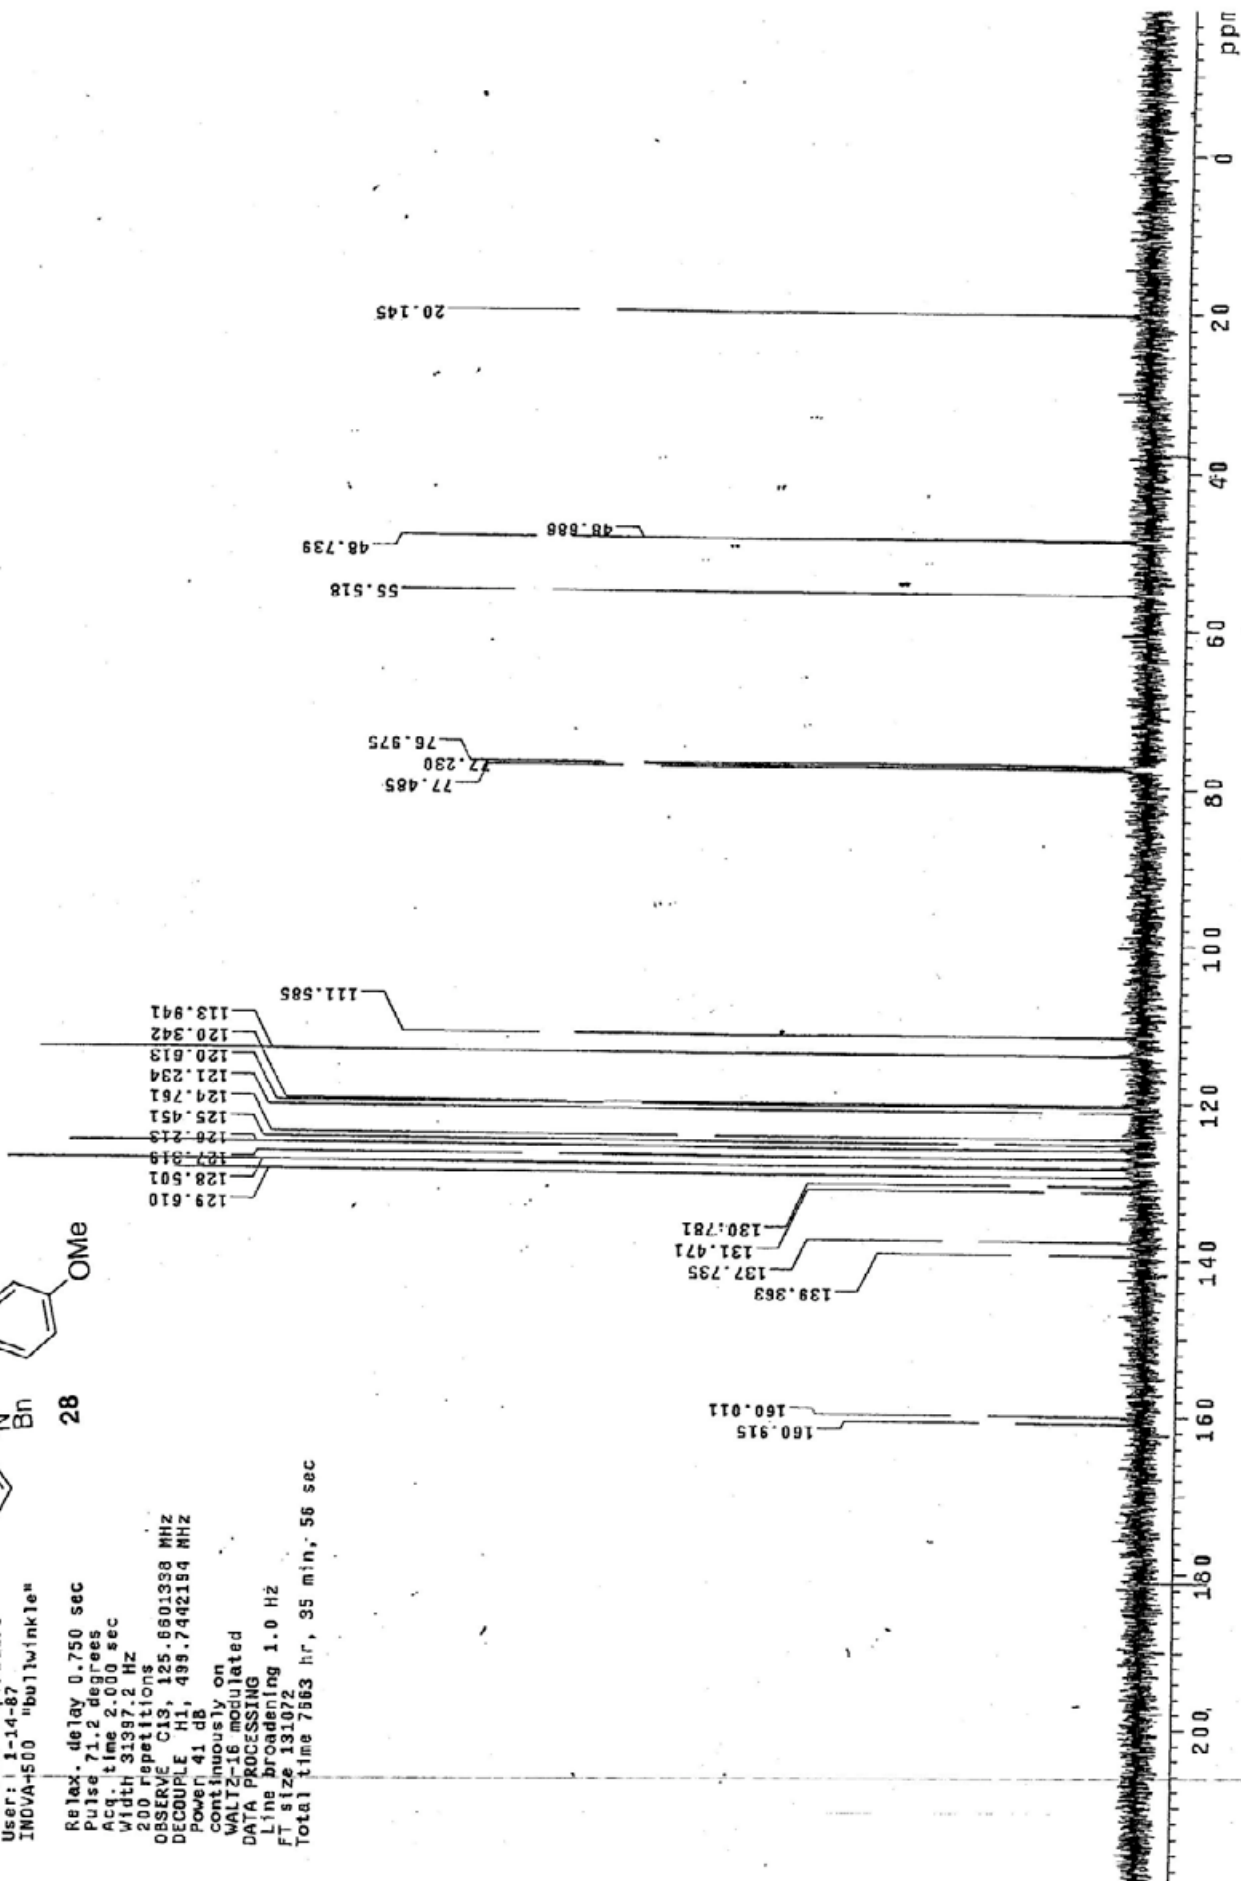

Pulse Sequence: s2pul  
Solvent: CDCl3  
Ambient temperature  
INOVA-500 "bulwinkle"

Relax. delay 5.000 sec  
Pulse 94.4 degrees  
Acq. time 3.001 sec  
Width 10504.2 Hz  
5 repetitions  
OBSERVE H1 499.7417206 MHZ  
DATA PROCESSING  
FT size 262144  
Total time 2 min, 8 sec

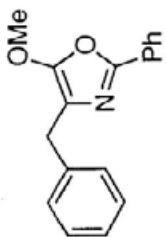

30

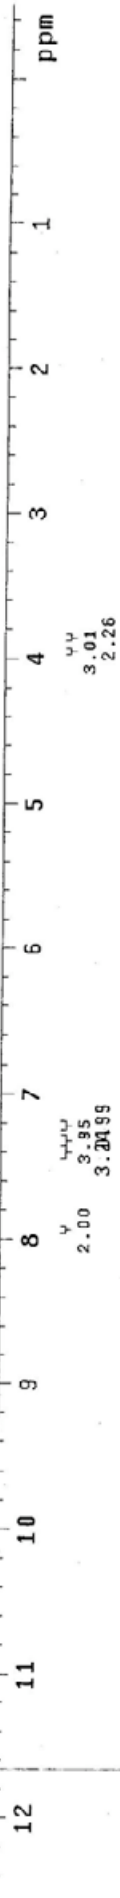

Pulse Sequence: s2pu1  
 Solvent: CDCl3  
 Ambient temperature  
 User: 1-14-87  
 INOVA-500 "bui\wink1e"  
 Relax. delay 0.750 sec  
 Pulse 40.4 degrees  
 Acq. time 2.000 sec  
 Width 3137.2 Hz  
 32 repetitions  
 OBSERVE C13, 125.6601481 MHZ  
 DECOUPLE H1, 499.7442194 MHZ  
 Power 34 dB  
 continuously on  
 WALTZ-16 modulated  
 DATA PROCESSING  
 Line broadening 1.0 Hz  
 FT size 131072  
 Total time 76635 hr, 59 min, 28 sec

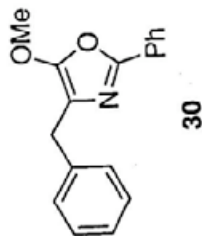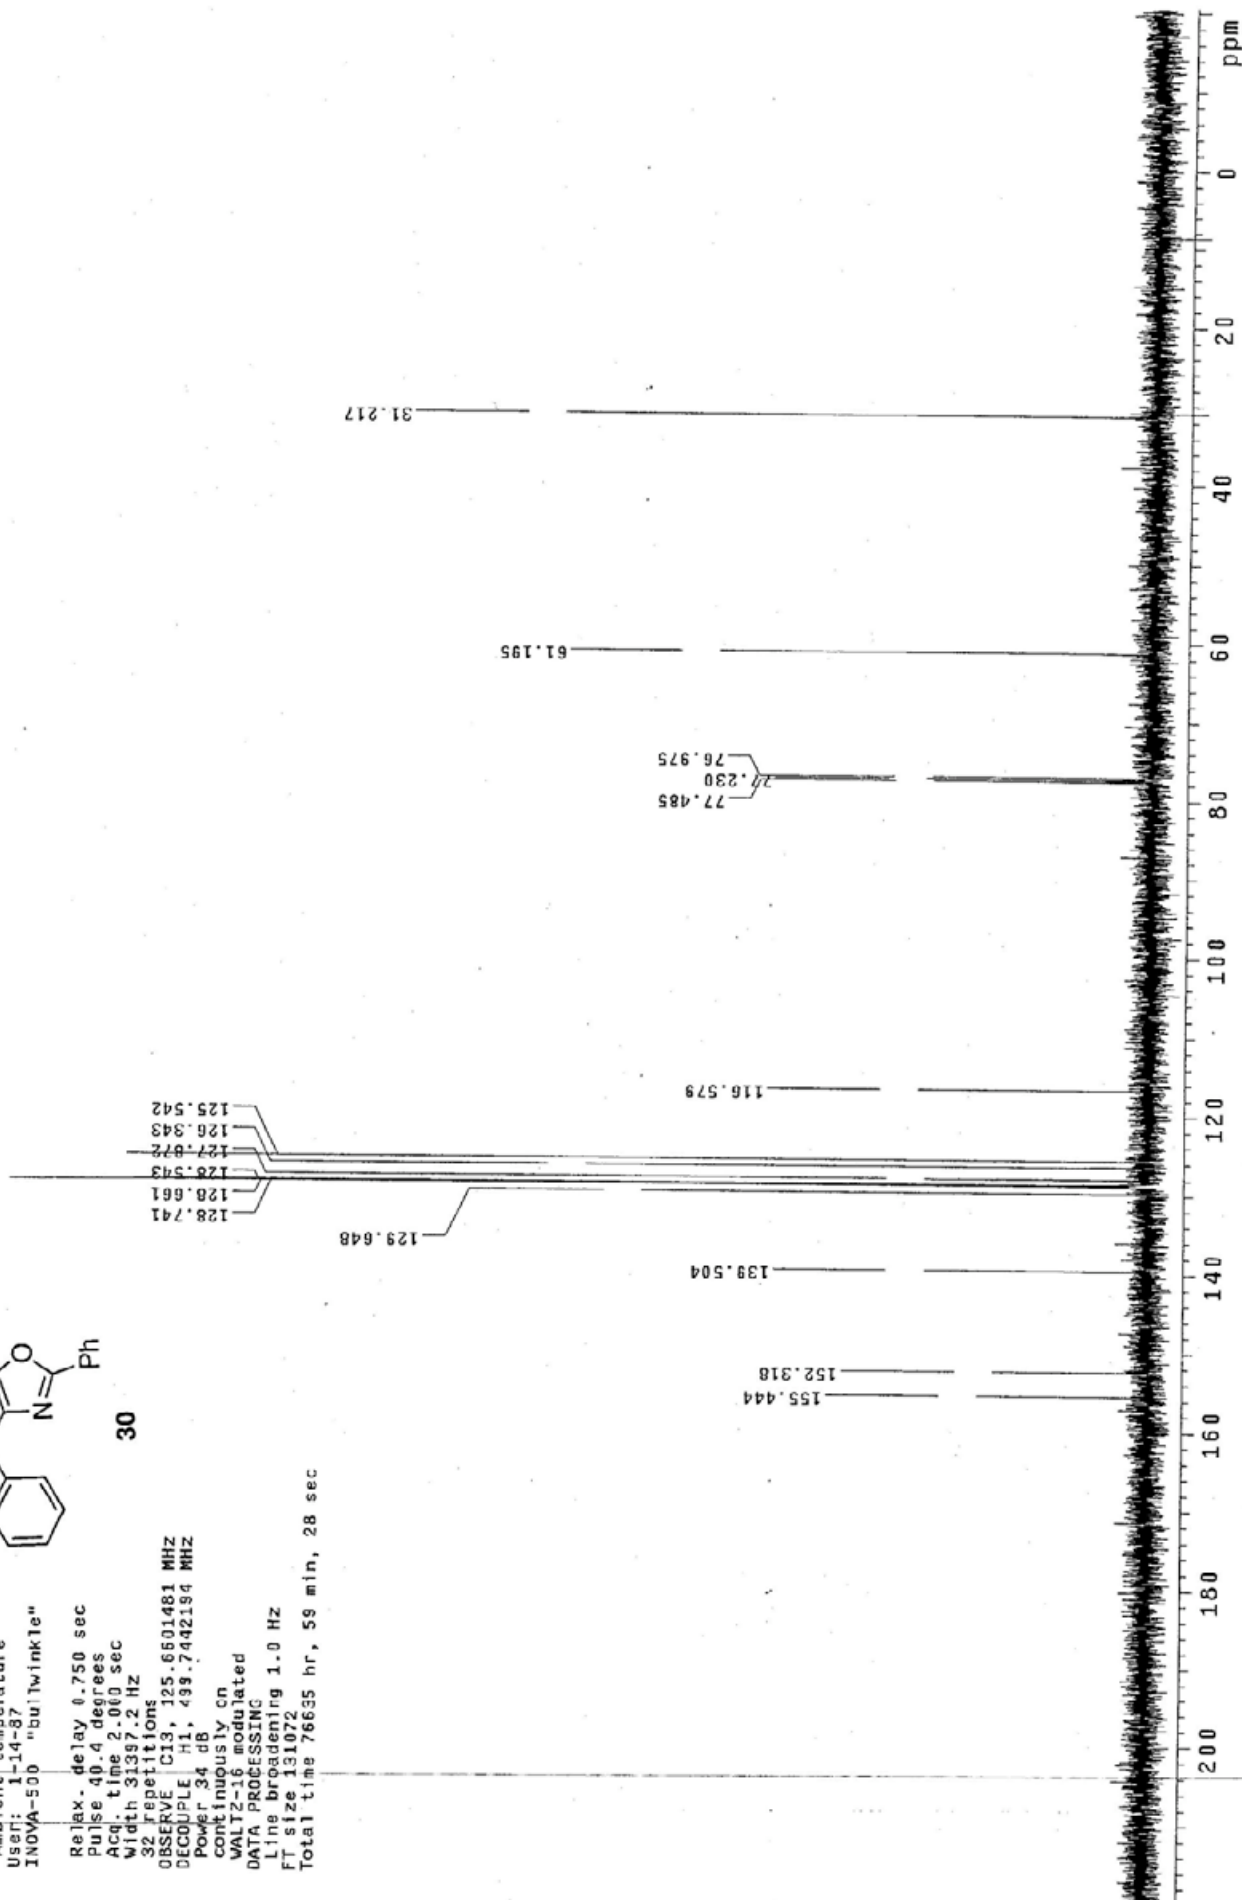

Pulse Sequence: s2pu1  
Solvent: CDCl3  
Ambient temperature  
INOVA-500 "butlwinkle"  
PULSE SEQUENCE  
Pulse: 85.8 degrees  
Acq. time 3.277 sec  
Width 9936.8 Hz  
16 repetitions  
OBSERVE H1, 499.7537710 MHz  
DATA PROCESSING  
FT size 65536  
Total time 0 min, 52 sec

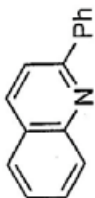

32

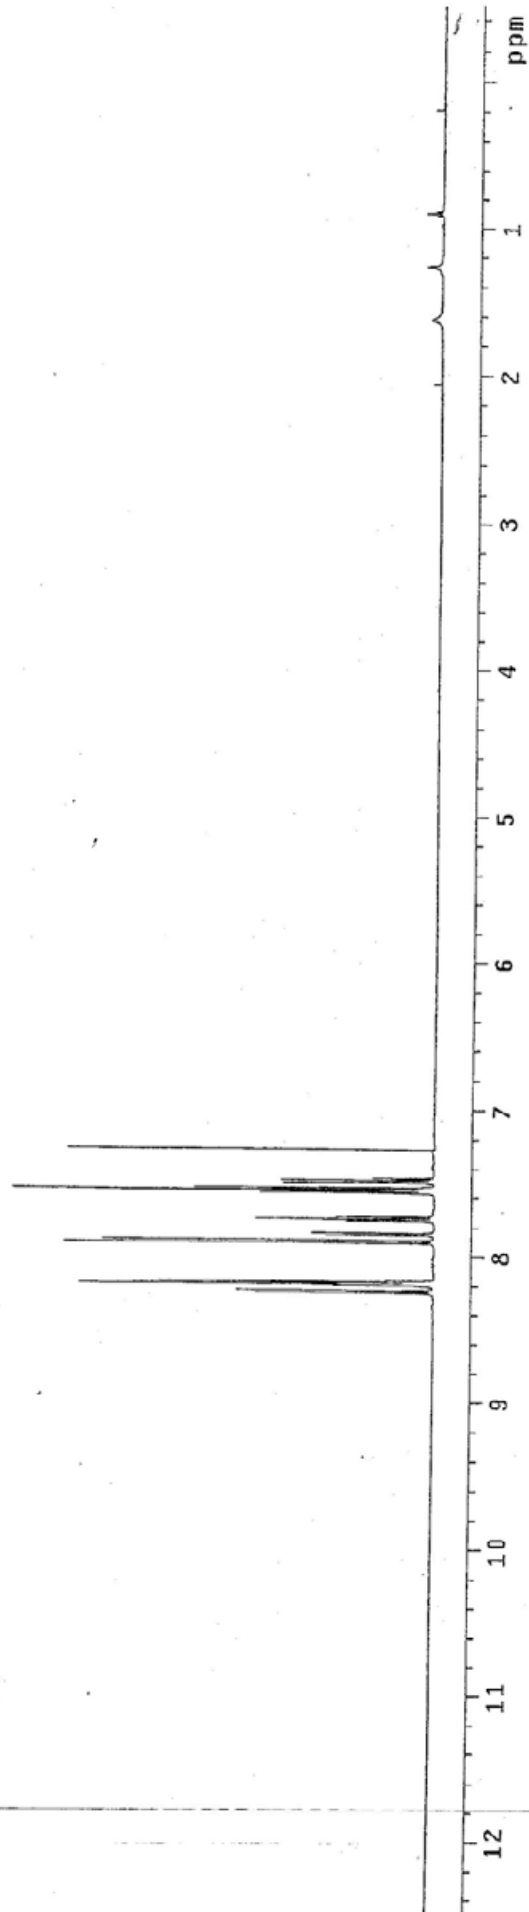



Solvent: CDCl<sub>3</sub>  
Temp. 20.0 C / 293.1 K  
User: j-14-87  
INOVA-500 "rocky"  
PULSE SEQUENCE  
Relax. delay 0.763 sec  
Pulse 65.4 degrees  
Acq. time 1.736 sec  
Width 3735.8 Hz  
100 repetitions  
OBSERVE C13, 125.7832332 MHz  
DECOUPLE H1, 500.2332753 MHz  
Power 49 dB  
continuously on  
WALTZ-16 modulated  
DATA PROCESSING  
Line broadening 0.3 Hz  
FT size 131072  
Total time 4 minutes

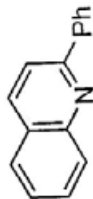

32

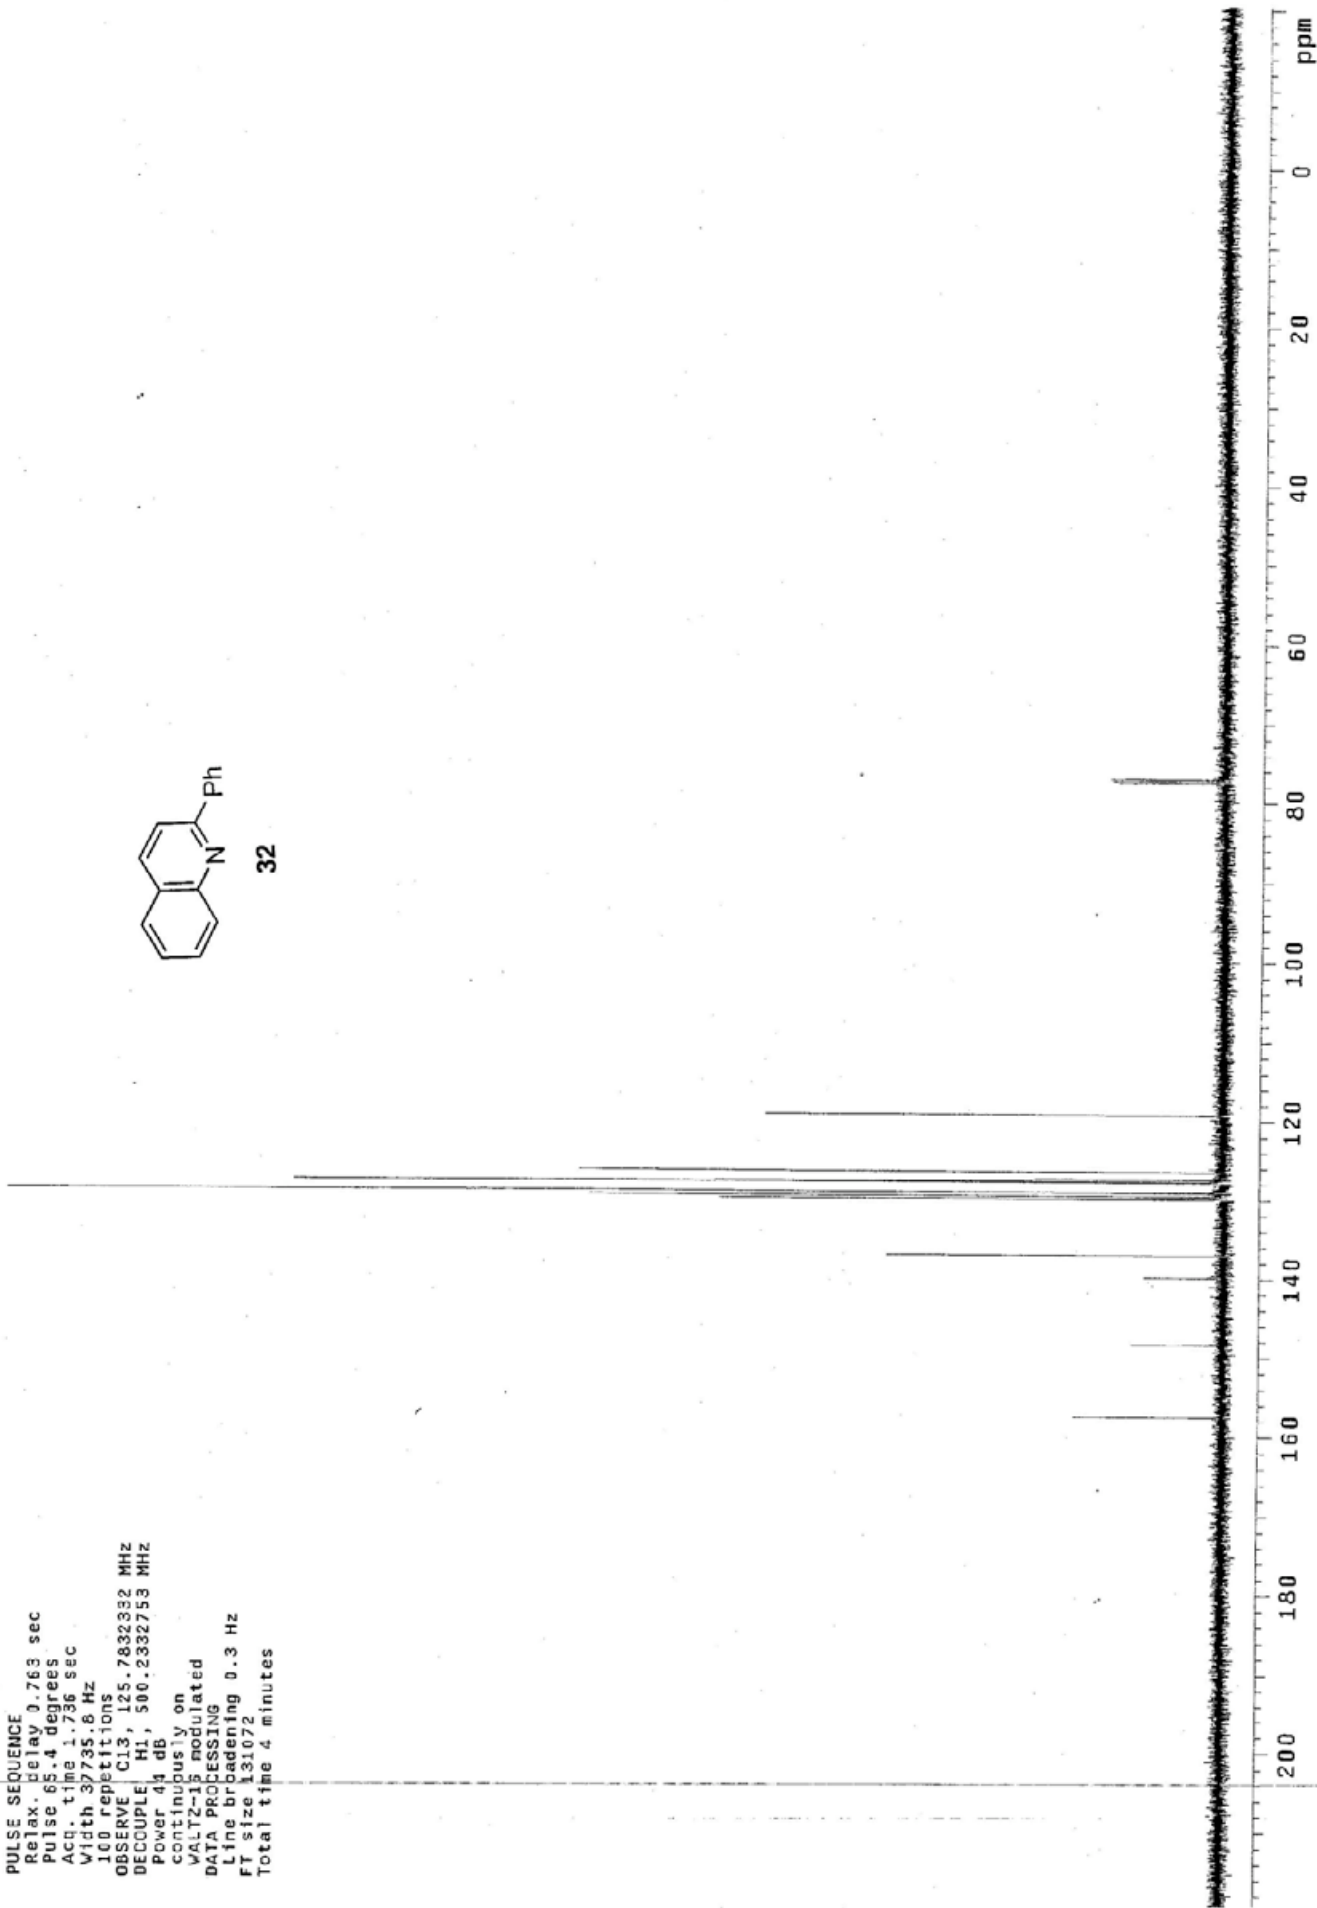

Pulse Sequence: s2pu1  
Solvent: CDCl3  
Ambient temperature  
INDVA-500 "casper"

Relax. delay 5.000 sec  
Pulse 78.7 degrees  
Acq. time 4.599 sec  
Width 12012.0 Hz  
5 repetitions

OBSERVE H1 500.4294375 MHz  
DATA PROCESSING  
FT size 262144  
Total time 2 min, 40 sec

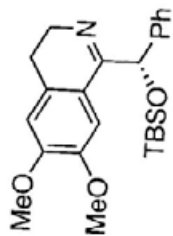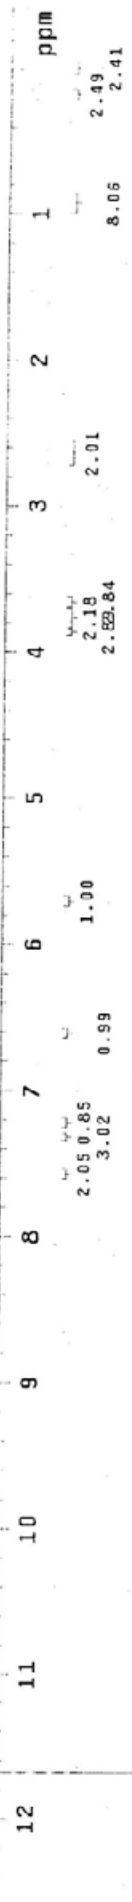

Pulse Sequence: s2pu1  
 Solvent: CDCl3  
 Ambient temperature  
 User: j14-87  
 INOVA-500 "bullwinkle"

Relax. delay 0.750 sec  
 Pulse 71.2 degrees  
 Acq. time 2.000 sec  
 Width 31397.2 Hz  
 40 repetitions  
 OBSERVE C13, 125.6601333 MHZ  
 DECOUPLE H1, 499.7442194 MHZ  
 Power 41 dB  
 continuously on  
 WALTZ-16 modulated  
 DATA PROCESSING  
 Line broadening 1.0 Hz  
 FT size 131072  
 Total time 7653 hr, 35 min, 56 sec

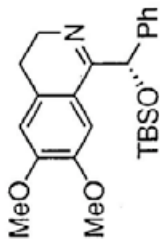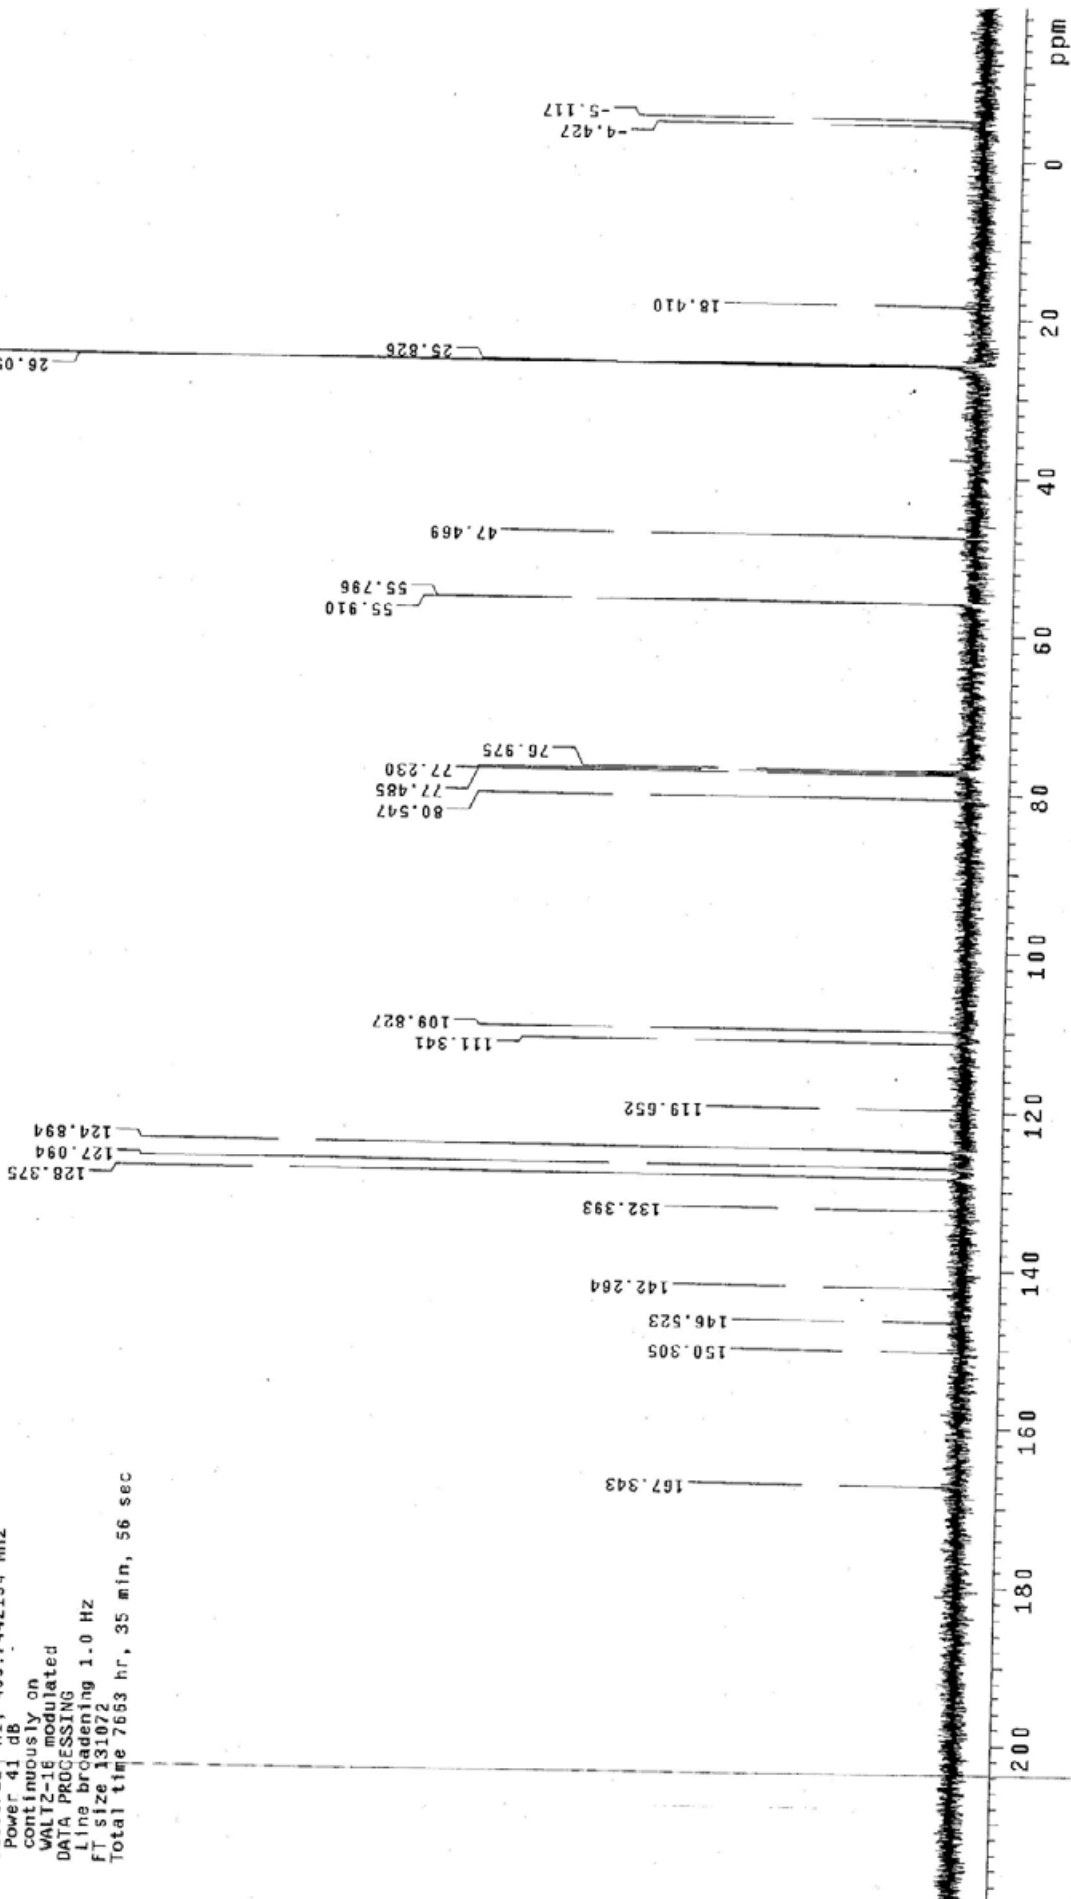

Injection Date : 4/5/2008 6:09:50 PM  
 Sample Name :  
 Acq. Operator :  
 Acq. Method : C:\HPCHEM\2\METHODS\MATT.M  
 Last changed : 4/5/2008 6:08:45 PM  
 Analysis Method : C:\HPCHEM\2\METHODS\MEDLEY.M  
 Last changed : 4/5/2008 6:43:57 PM  
 (modified after loading)

Seq. Line : 1  
 Location : Vial 7  
 Inj : 1  
 Inj Volume : 1 µl

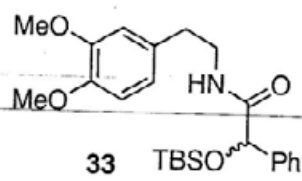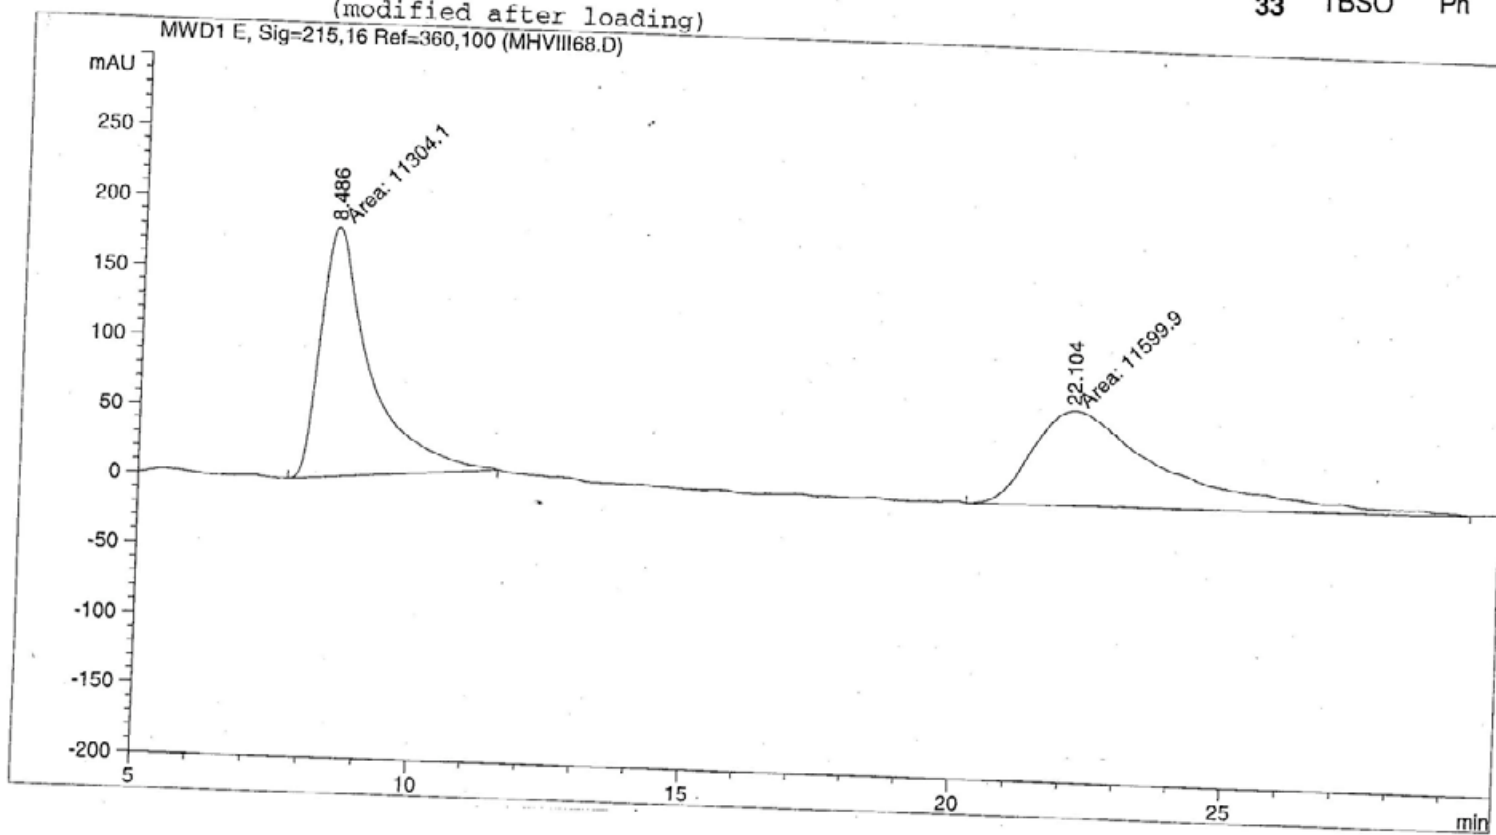

Area Percent Report

Sorted By : Signal  
 Multiplier : 1.0000  
 Dilution : 1.0000  
 Use Multiplier & Dilution Factor with ISTDs

Signal 1: MWD1 E, Sig=215,16 Ref=360,100

| Peak #   | RetTime [min] | Type | Width [min] | Area [mAU*s] | Height [mAU] | Area %  |
|----------|---------------|------|-------------|--------------|--------------|---------|
| 1        | 8.486         | MM   | 1.0498      | 1.13041e4    | 179.47047    | 49.3543 |
| 2        | 22.104        | MM   | 2.8252      | 1.15999e4    | 68.42989     | 50.6457 |
| Totals : |               |      |             | 2.29040e4    | 247.90037    |         |

Results obtained with enhanced integrator!

\*\*\* End of Report \*\*\*

```

=====
Injection Date : 4/7/2008 2:17:16 PM      Seq. Line : 1
Sample Name   :                               Location  : Vial 6
Acq. Operator :                               Inj      : 1
                                           Inj Volume: 1 µl
Acq. Method   : C:\HPCHEM\2\METHODS\MATT.M
Last changed  : 4/5/2008 6:08:45 PM
Analysis Method : C:\HPCHEM\2\METHODS\MEDLEY.M
Last changed  : 4/7/2008 2:55:48 PM
                                           (modified after loading)
=====

```

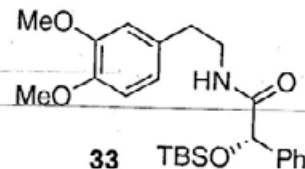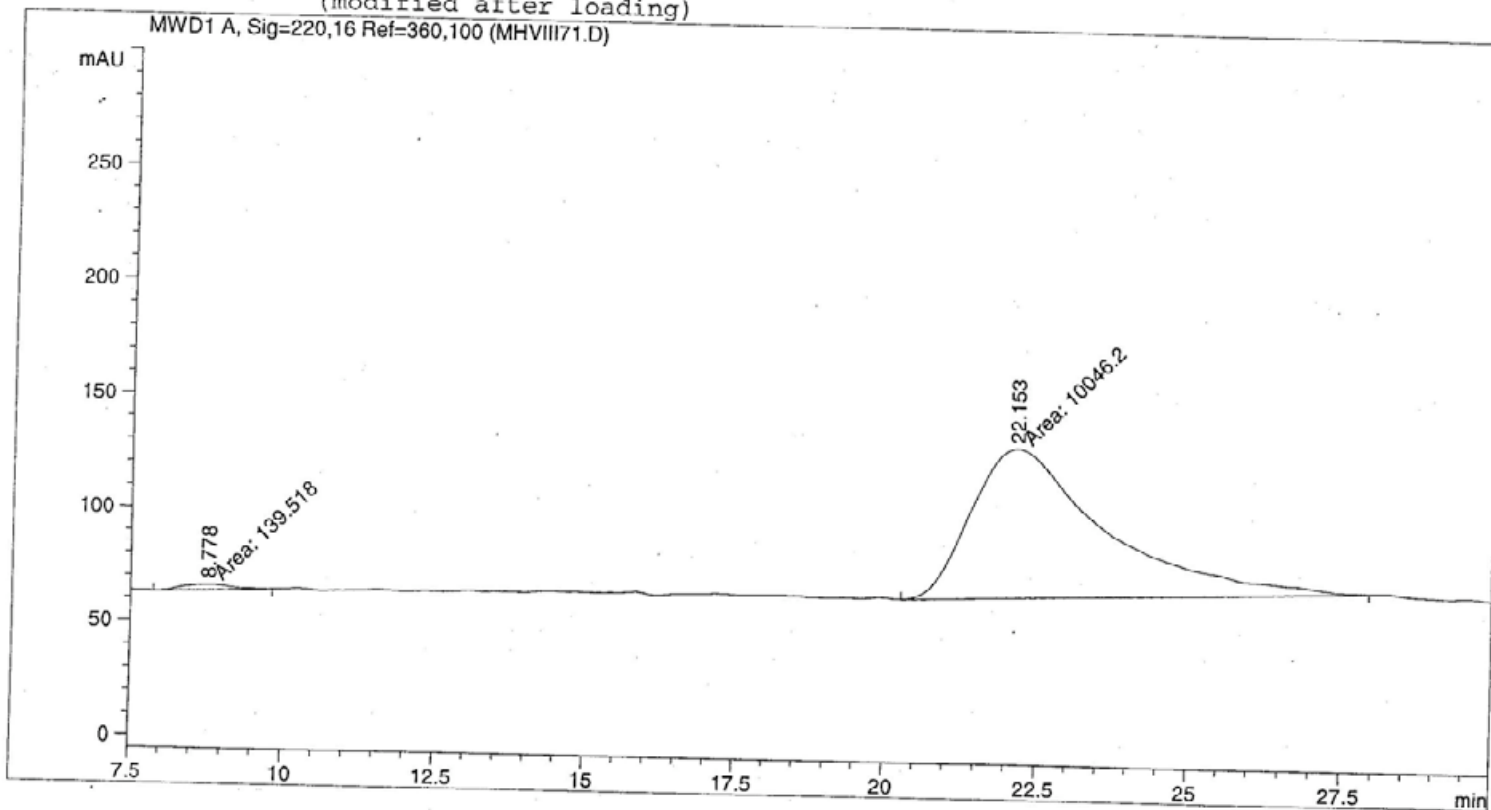

```

=====
Area Percent Report
=====

```

```

Sorted By      : Signal
Multiplier     : 1.0000
Dilution       : 1.0000
Use Multiplier & Dilution Factor with ISTDs

```

Signal 1: MWD1 A, Sig=220,16 Ref=360,100

| Peak # | RetTime [min] | Type | Width [min] | Area [mAU*s] | Height [mAU] | Area %  |
|--------|---------------|------|-------------|--------------|--------------|---------|
| 1      | 8.778         | MM   | 0.9170      | 139.51765    | 2.53569      | 1.3697  |
| 2      | 22.153        | MM   | 2.5675      | 1.00462e4    | 65.21315     | 98.6303 |

```
Totals :                1.01857e4    67.74884
```

Results obtained with enhanced integrator!

```

=====
*** End of Report ***
=====

```

Injection Date : 4/1/2008 6:02:17 PM  
 Sample Name :  
 Acq. Operator :  
 Acq. Method : C:\HPCHEM\2\METHODS\MATT.M  
 Last changed : 4/1/2008 6:00:44 PM  
 Analysis Method : C:\HPCHEM\2\METHODS\MEDLEY.M  
 Last changed : 4/1/2008 7:05:25 PM  
 (modified after loading)

Seq. Line : 1  
 Location : Vial 10  
 Inj : 1  
 Inj Volume : 1 µl

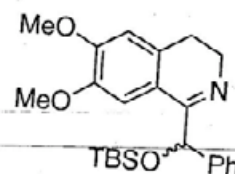

34

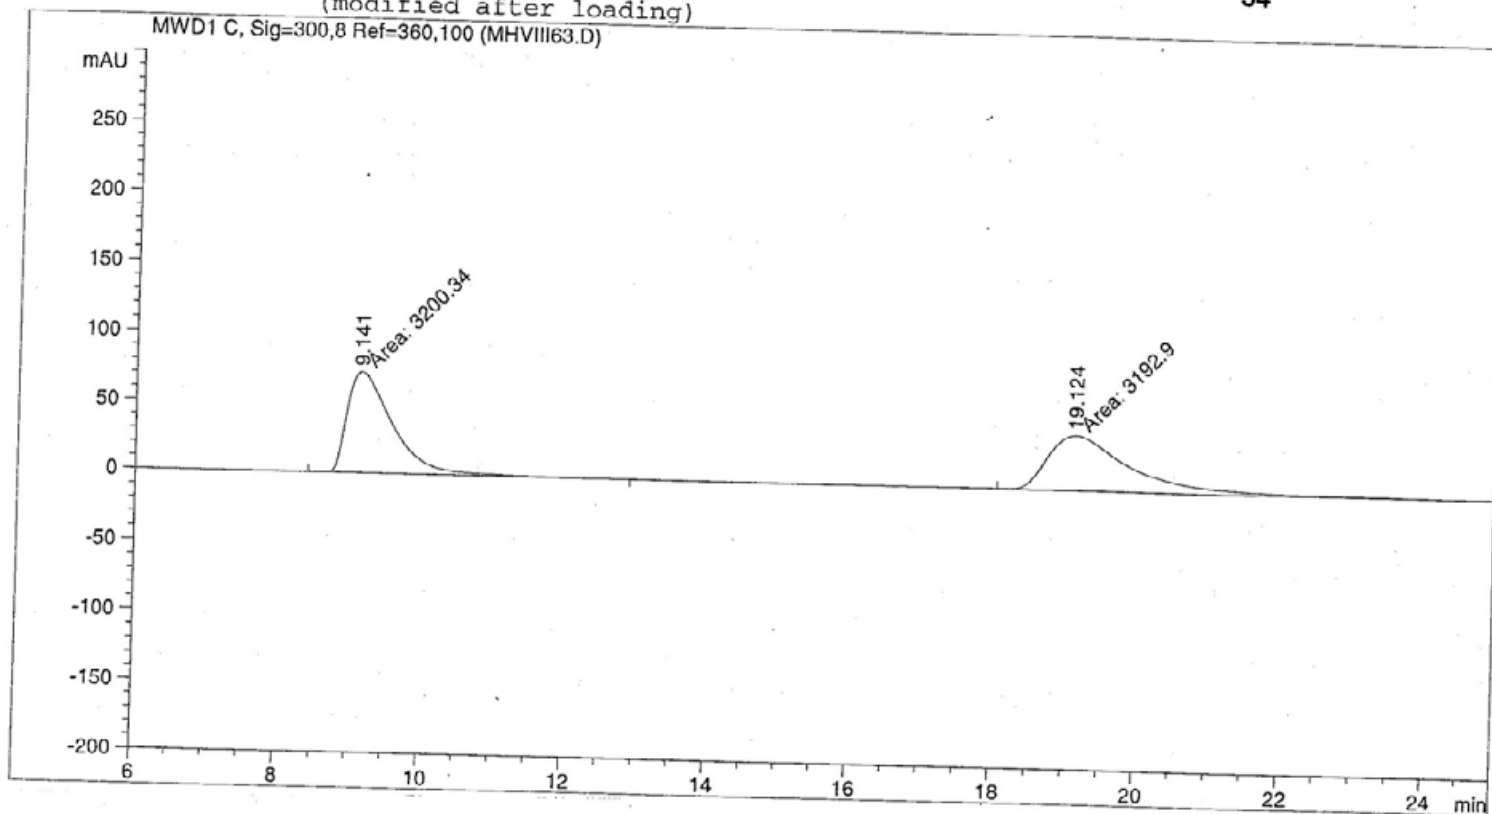

Area Percent Report

Sorted By : Signal  
 Multiplier : 1.0000  
 Dilution : 1.0000  
 Use Multiplier & Dilution Factor with ISTDs

Signal 1: MWD1 C, Sig=300,8 Ref=360,100

| Peak # | RetTime [min] | Type | Width [min] | Area [mAU*s] | Height [mAU] | Area %  |
|--------|---------------|------|-------------|--------------|--------------|---------|
| 1      | 9.141         | MM   | 0.7312      | 3200.33936   | 72.94856     | 50.0582 |
| 2      | 19.124        | MM   | 1.3487      | 3192.89502   | 39.45781     | 49.9418 |

Totals : 6393.23437 112.40637

Results obtained with enhanced integrator!

\*\*\* End of Report \*\*\*

Injection Date : 4/5/2008 5:05:00 PM  
Sample Name :  
Acq. Operator :

Seq. Line : 1  
Location : Vial 6  
Inj : 1  
Inj Volume : 1 µl

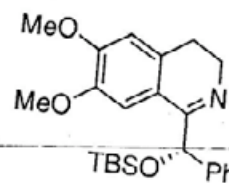

34

Acq. Method : C:\HPCHEM\2\METHODS\MATT.M  
Last changed : 4/5/2008 5:03:57 PM  
Analysis Method : C:\HPCHEM\2\METHODS\MEDLEY.M  
Last changed : 4/5/2008 5:40:43 PM  
(modified after loading)

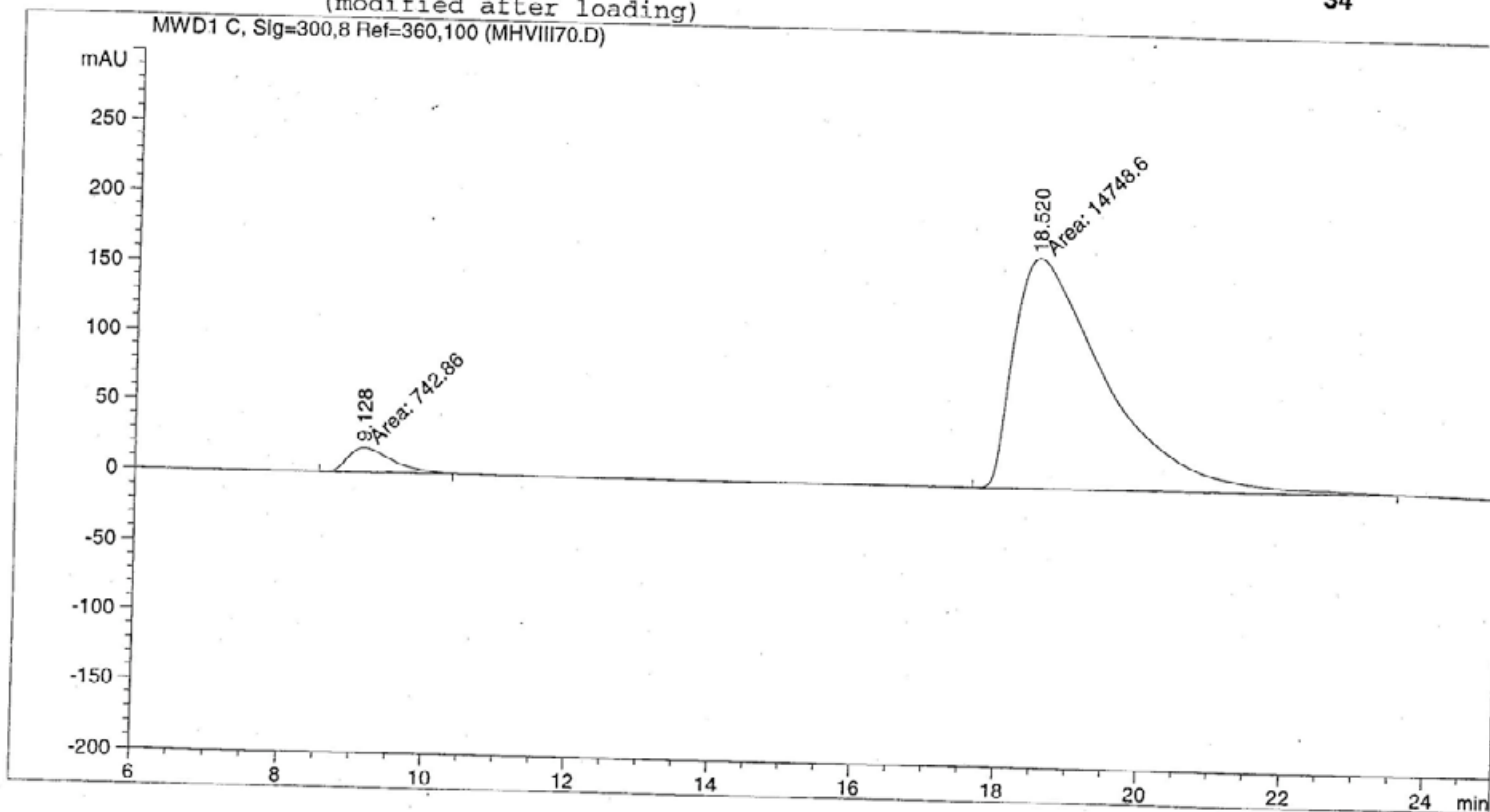

Area Percent Report

Sorted By : Signal  
Multiplier : 1.0000  
Dilution : 1.0000  
Use Multiplier & Dilution Factor with ISTDs

Signal 1: MWD1 C, Sig=300,8 Ref=360,100

| Peak # | RetTime [min] | Type | Width [min] | Area [mAU*s] | Height [mAU] | Area %  |
|--------|---------------|------|-------------|--------------|--------------|---------|
| 1      | 9.128         | MM   | 0.7114      | 742.85962    | 17.40329     | 4.7953  |
| 2      | 18.520        | MM   | 1.4912      | 1.47486e4    | 164.83789    | 95.2047 |

Totals : 1.54914e4 182.24118

Results obtained with enhanced integrator!

\*\*\* End of Report \*\*\*



Pulse Sequence: s2pul  
 Solvent: CDCl3  
 Ambient temperature  
 INOVA-500 "casper"  
 Relax. delay 5.000 sec  
 Pulse 29.7 degrees  
 Acq. time 4.999 sec  
 Width 12012.0 Hz  
 9 repetitions  
 OBSERVE H1 500.4294975 MHz  
 DATA PROCESSING  
 FT size 262144  
 Total time 2 min, 40 sec

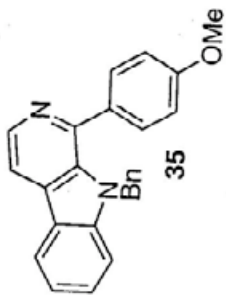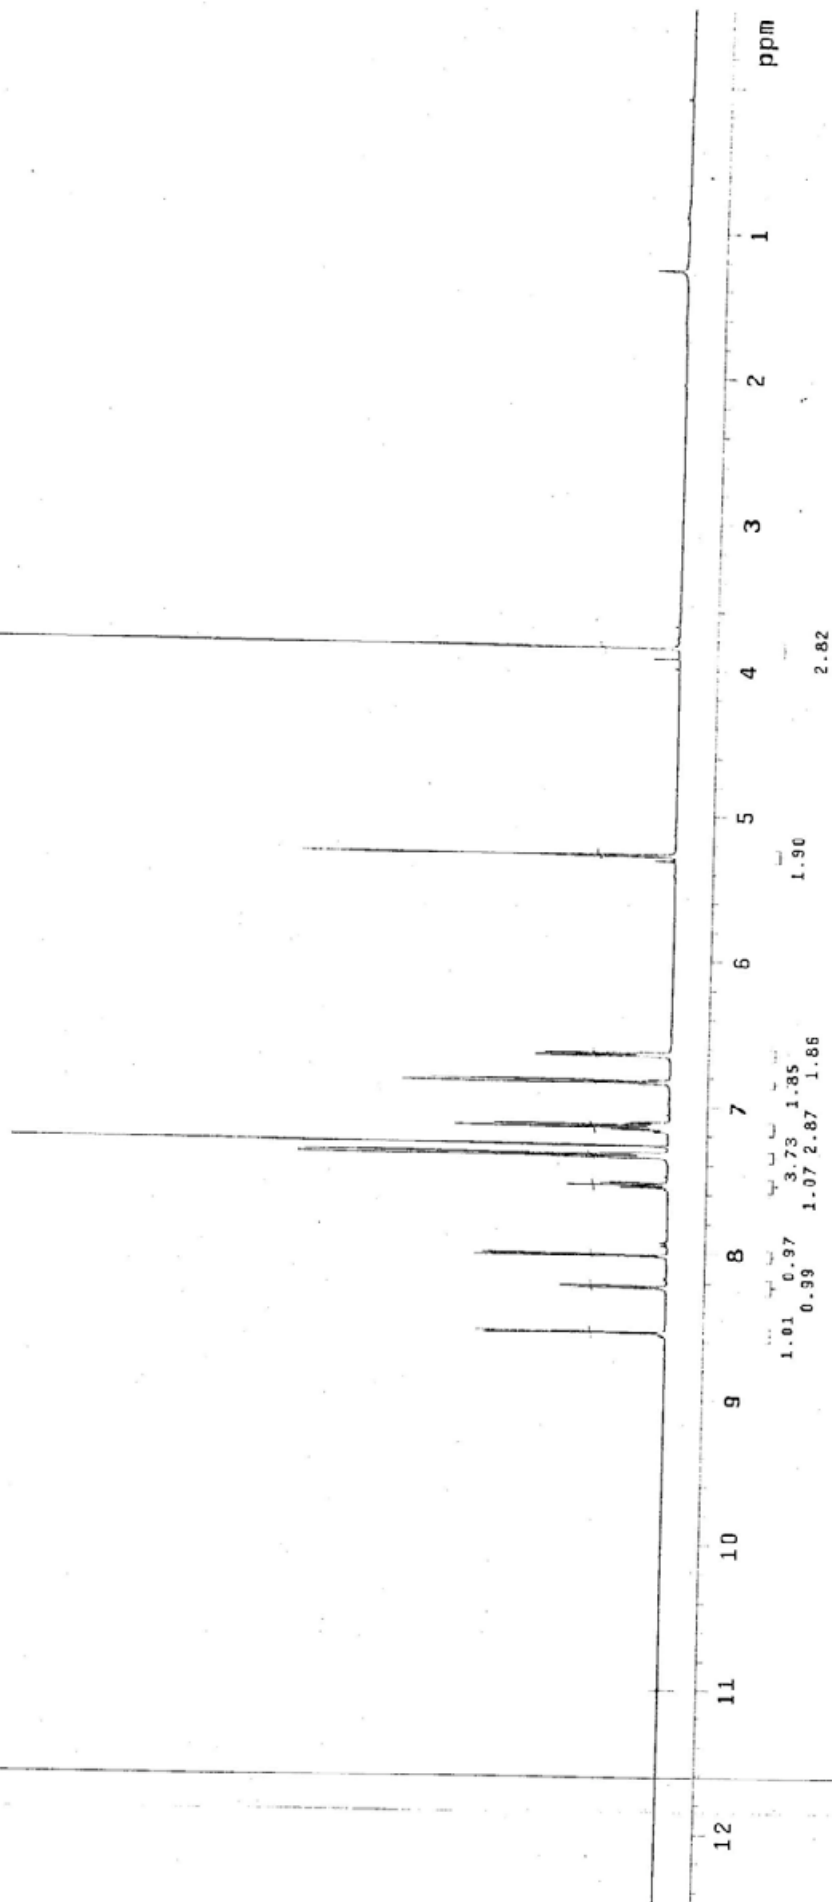



Pulse Sequence: s2pul  
 Solvent: Benzene  
 Ambient temperature  
 User: 1-14-87  
 File: mh-VIII-4c2  
 INOVA-500 "zippy"  
 PULSE SEQUENCE  
 Relax delay 0.750 sec  
 Pulse 40.4 degrees  
 Acq. time 2.000 sec  
 Width 31397.2 Hz  
 240 repetitions  
 OBSERVE C13, 125.6601275 MHz  
 DECOUPLE H1, 499.7442644 MHz  
 Power 34 dB  
 continuously on  
 WALTZ-16 modulated  
 DATA PROCESSING  
 Line broadening 3.0 Hz  
 FT size 131022  
 Total time 76 hr, 38 min, 9 sec

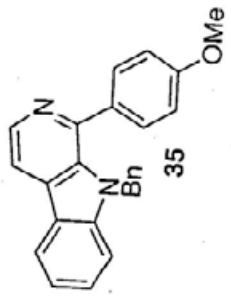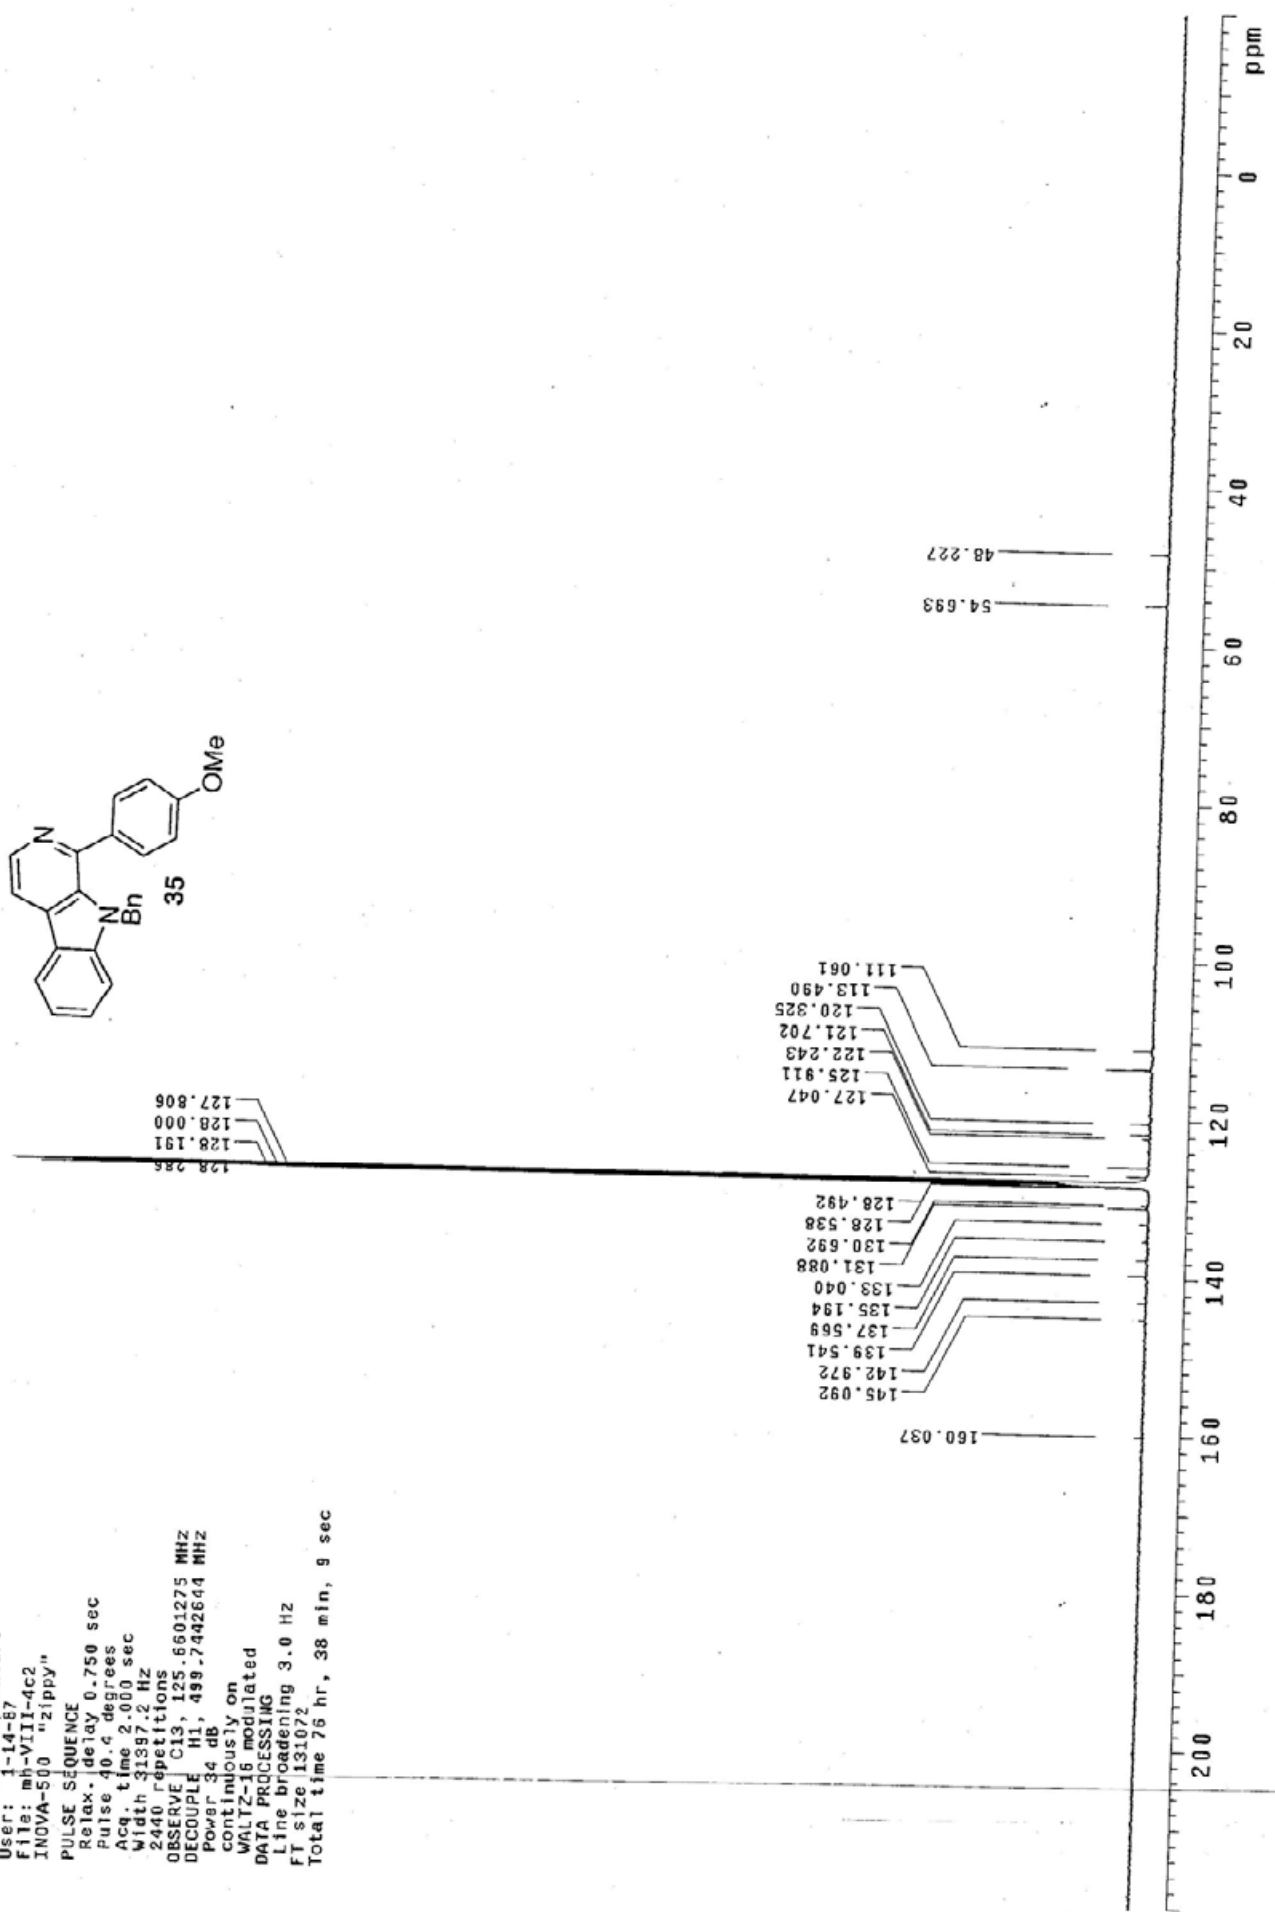

Pulse Sequence: s2pu1  
Solvent: CDCl3  
Ambient temperature  
INOVA-500 "casper"

Relax. delay 5.000 sec  
Pulse 78.7 degrees  
Acq. time 4.599 sec  
Width 2012.0 Hz  
4 repetitions  
OBSERVE H1 500.4294575 MHz  
DATA PROCESSING  
FT size 262144  
Total time 2 min, 40 sec

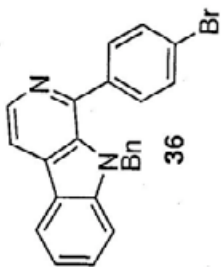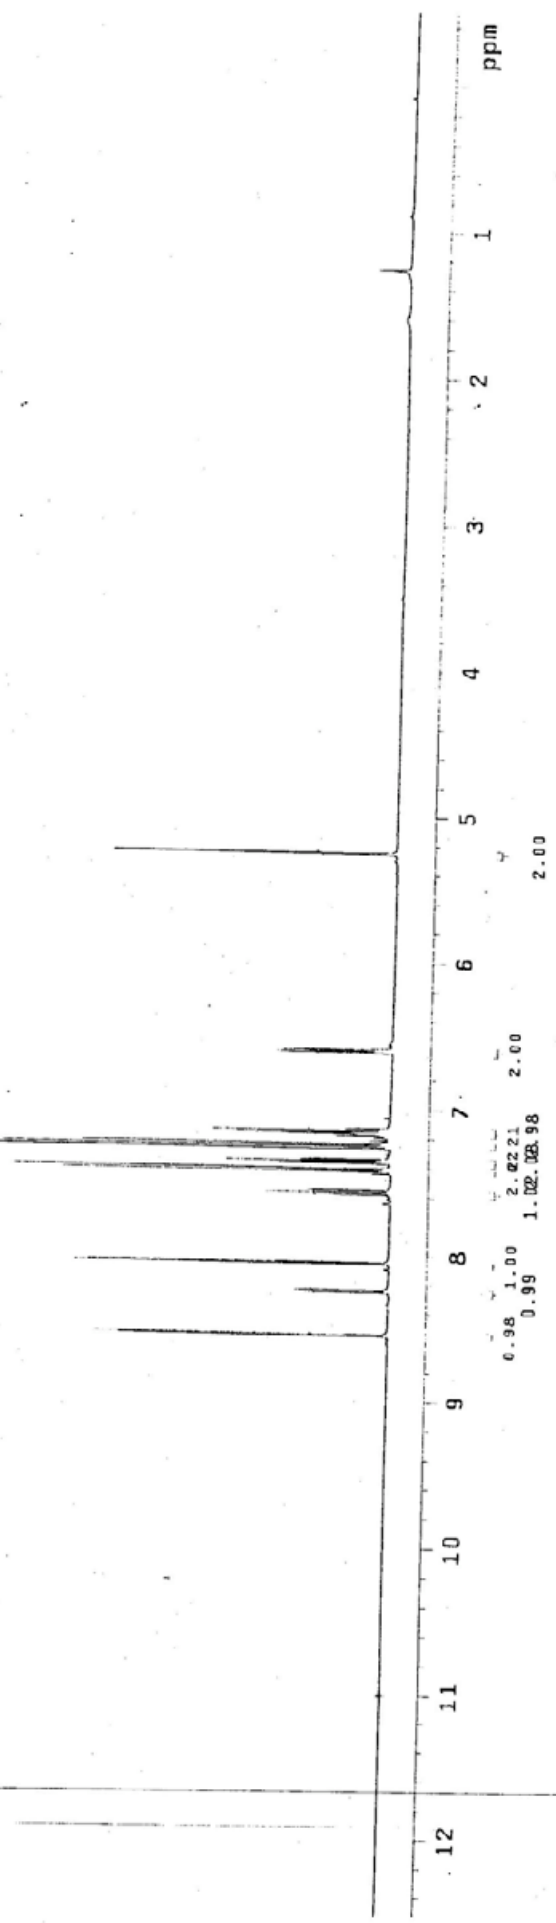

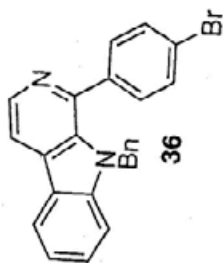

Pulse Sequence: s2pul

Solvent: CDCl3

Ambient temperature

User: 1-14-87

INOVA-500 "DullWinkle"

Relax. delay 0.700 sec

Pulse 71.2 degrees

Acq. time 2.000 sec

Width 31397.2 Hz

248 repetitions

OBSERVE C13, 125.6601314 MHz

DECOUPLE H1, 499.7442194 MHz

Power 41 dB

continuously on

WALTZ-16 modulated

DATA PROCESSING

Line broadening 1.0 Hz

FI size 131072

Total time 75247 hr, 6 min, 8 sec

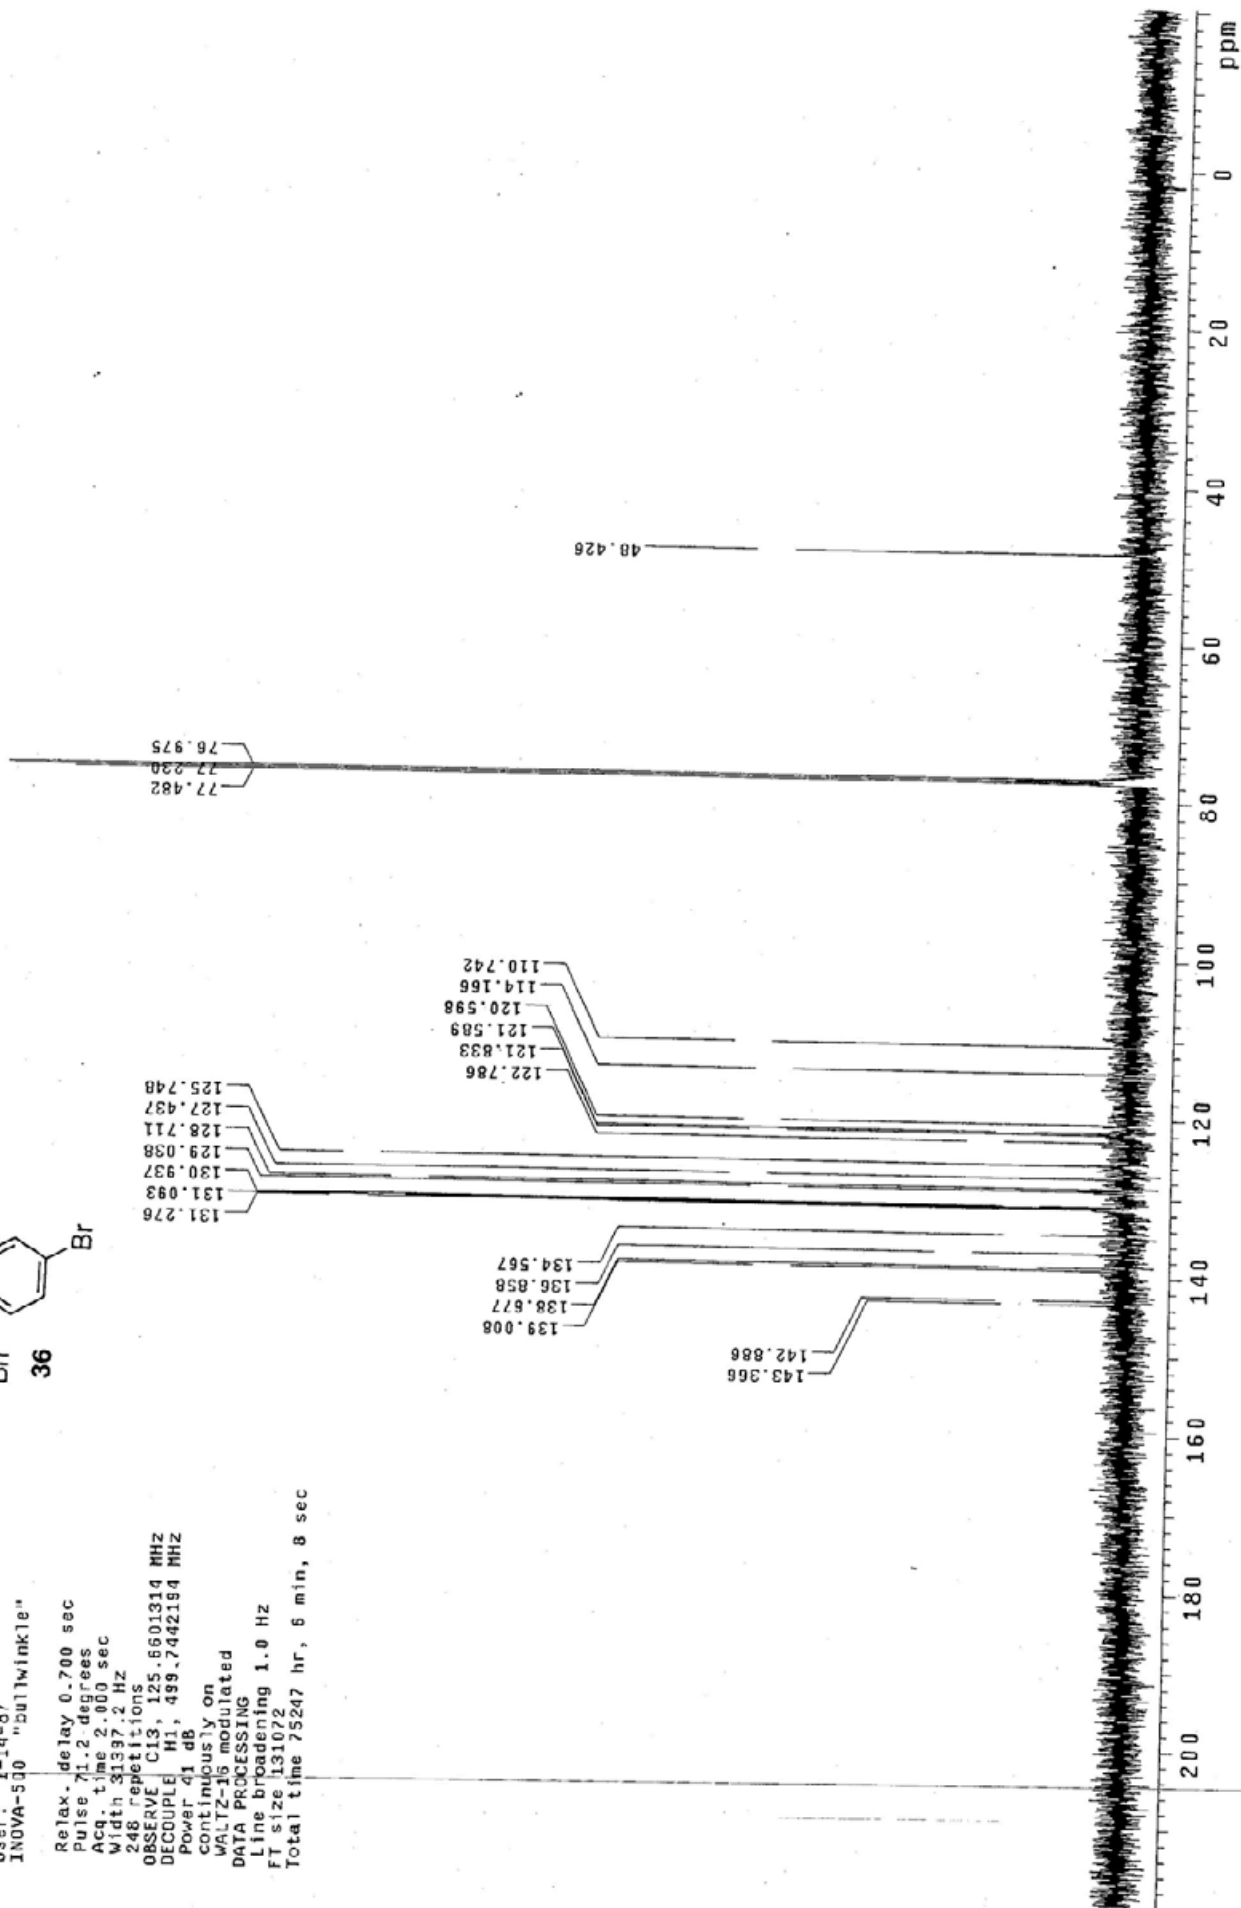

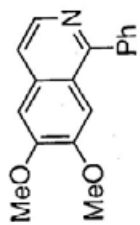

37

Pulse Sequence: s2pu1  
 Solvent: CDCl3  
 Ambient temperature  
 INOVA-500 "Casper"  
 Relax. delay 5.000 sec  
 Pulse 78.7 degrees  
 Acq. time 4.999 sec  
 Width 12012.0 Hz  
 4 repetitions  
 OBSERVE H1 500.4294975 MHz  
 DATA PROCESSING  
 FT size 262144  
 Total time 2 min, 40 sec

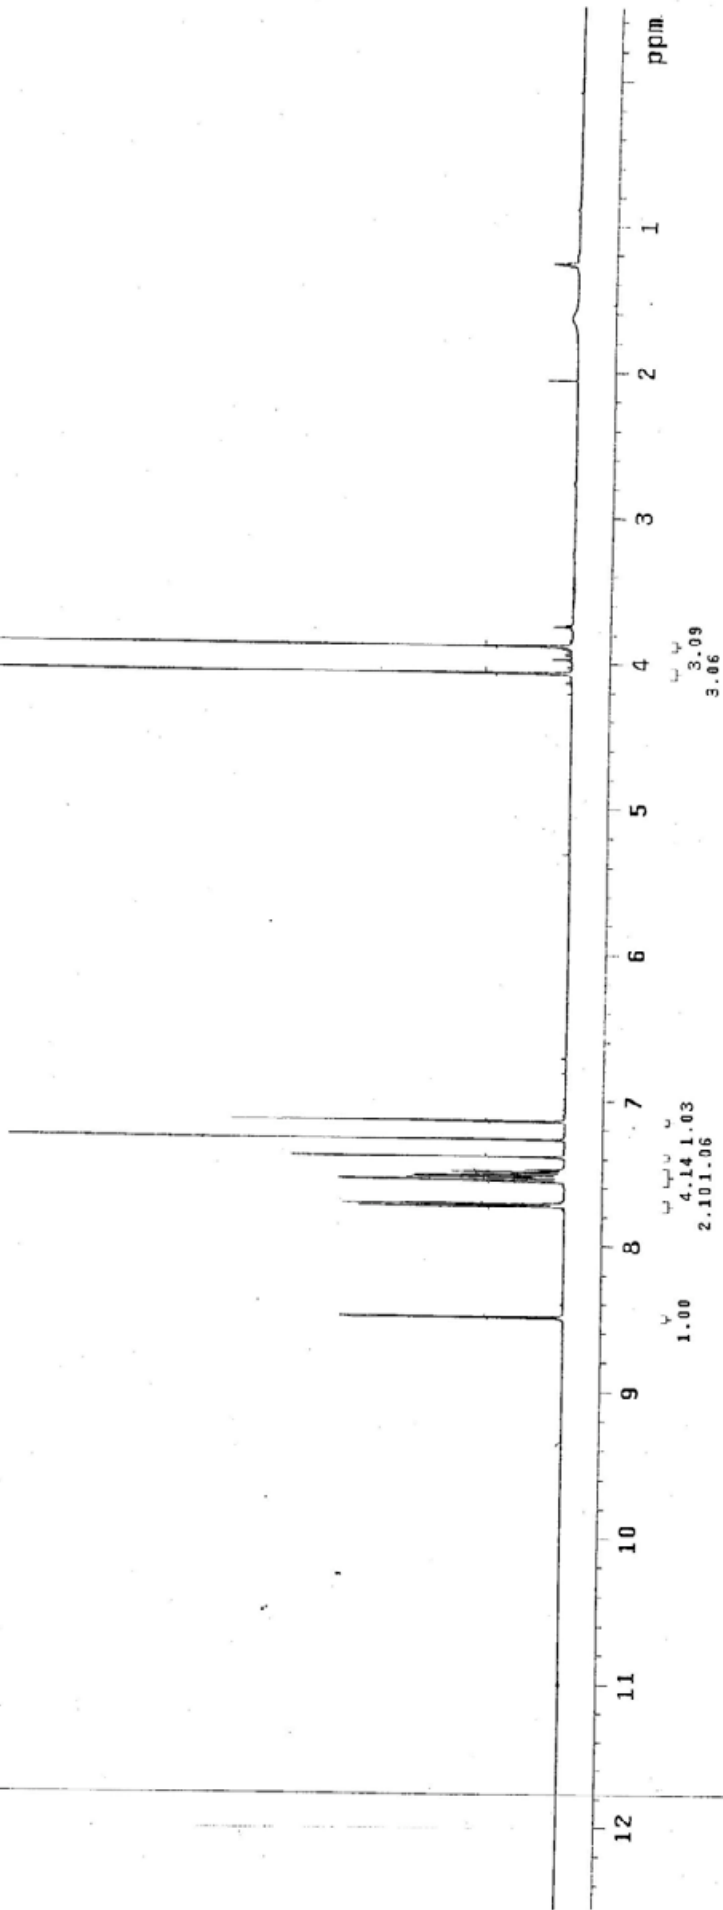

Pulse Sequence: s2pul  
 Solvent: CDCl3  
 Ambient temperature  
 User: 1-14-87  
 INOVA-500 "bullwinkle"

Relax. delay 0.750 sec  
 Pulse 71.2 degrees  
 Acq. time 2.000 sec  
 Width 31397.2 Hz  
 48 repetitions  
 OBSERVE C13, 125.6601328 MHZ  
 DECOUPLE H1, 499.7442194 MHZ  
 Power 41 dB  
 continuously on  
 WALTZ-16 modulated  
 DATA PROCESSING  
 Line broadening 1.0 Hz  
 FT size 131072  
 Total time 7663 hr, 35 min, 56 sec

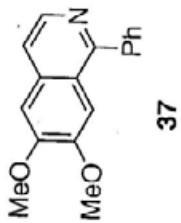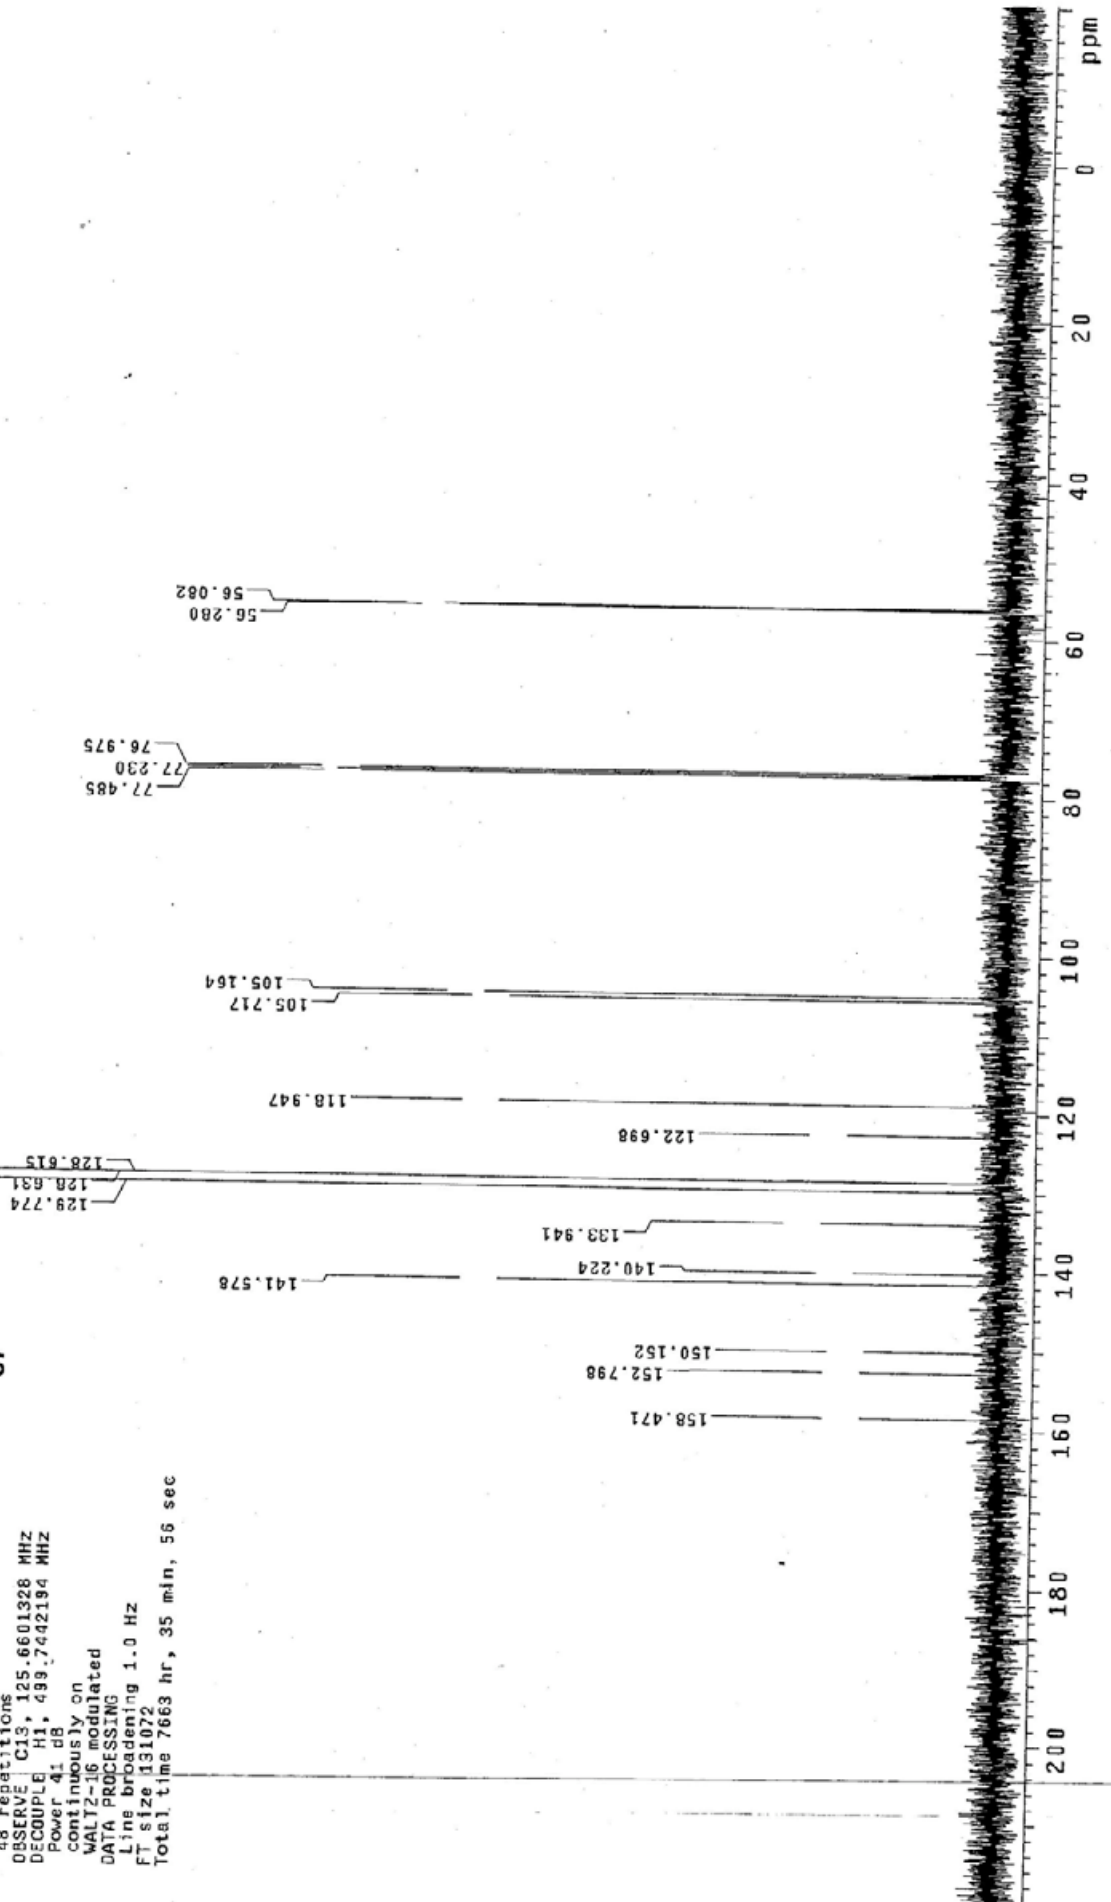

Pulse Sequence: s2pul  
Solvent: CDCl3  
Ambient temperature  
INDVA-500 "caspei"

Relax. delay 5.000 sec  
Pulse 78.7 degrees  
Acq. time 4.999 sec  
Width 12012.0 Hz  
5 repetitions

OBSERVE: H1, 500.4254975 MHz  
DATA PROCESSING  
FT size 262144  
Total time 2 min, 40 sec

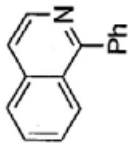

38

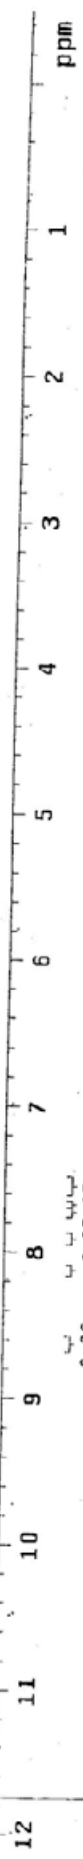

0.96  
0.92  
0.97  
0.95 2.84

Pulse Sequence: s2pu1  
 Solvent: CDCl3  
 Ambient temperature  
 User: 1-14-87  
 INOVA-500 "bwlwinkle"

Relax. delay 0.750 sec  
 Pulse 71.2 degrees  
 Acq. time 2.000 sec  
 Width 3137.2 Hz  
 1000000 repetitions  
 OBSERVE C13, 125.6601314 MHZ  
 DECOUPLE H1, 459.7442194 MHZ  
 Power 41 dB  
 continuously on  
 WALTZ-16 modulated  
 DATA PROCESSING  
 Line broadening 1.0 Hz  
 FT size 131072  
 Total time 766 hr, 21 min, 35 sec

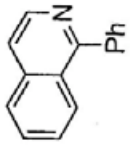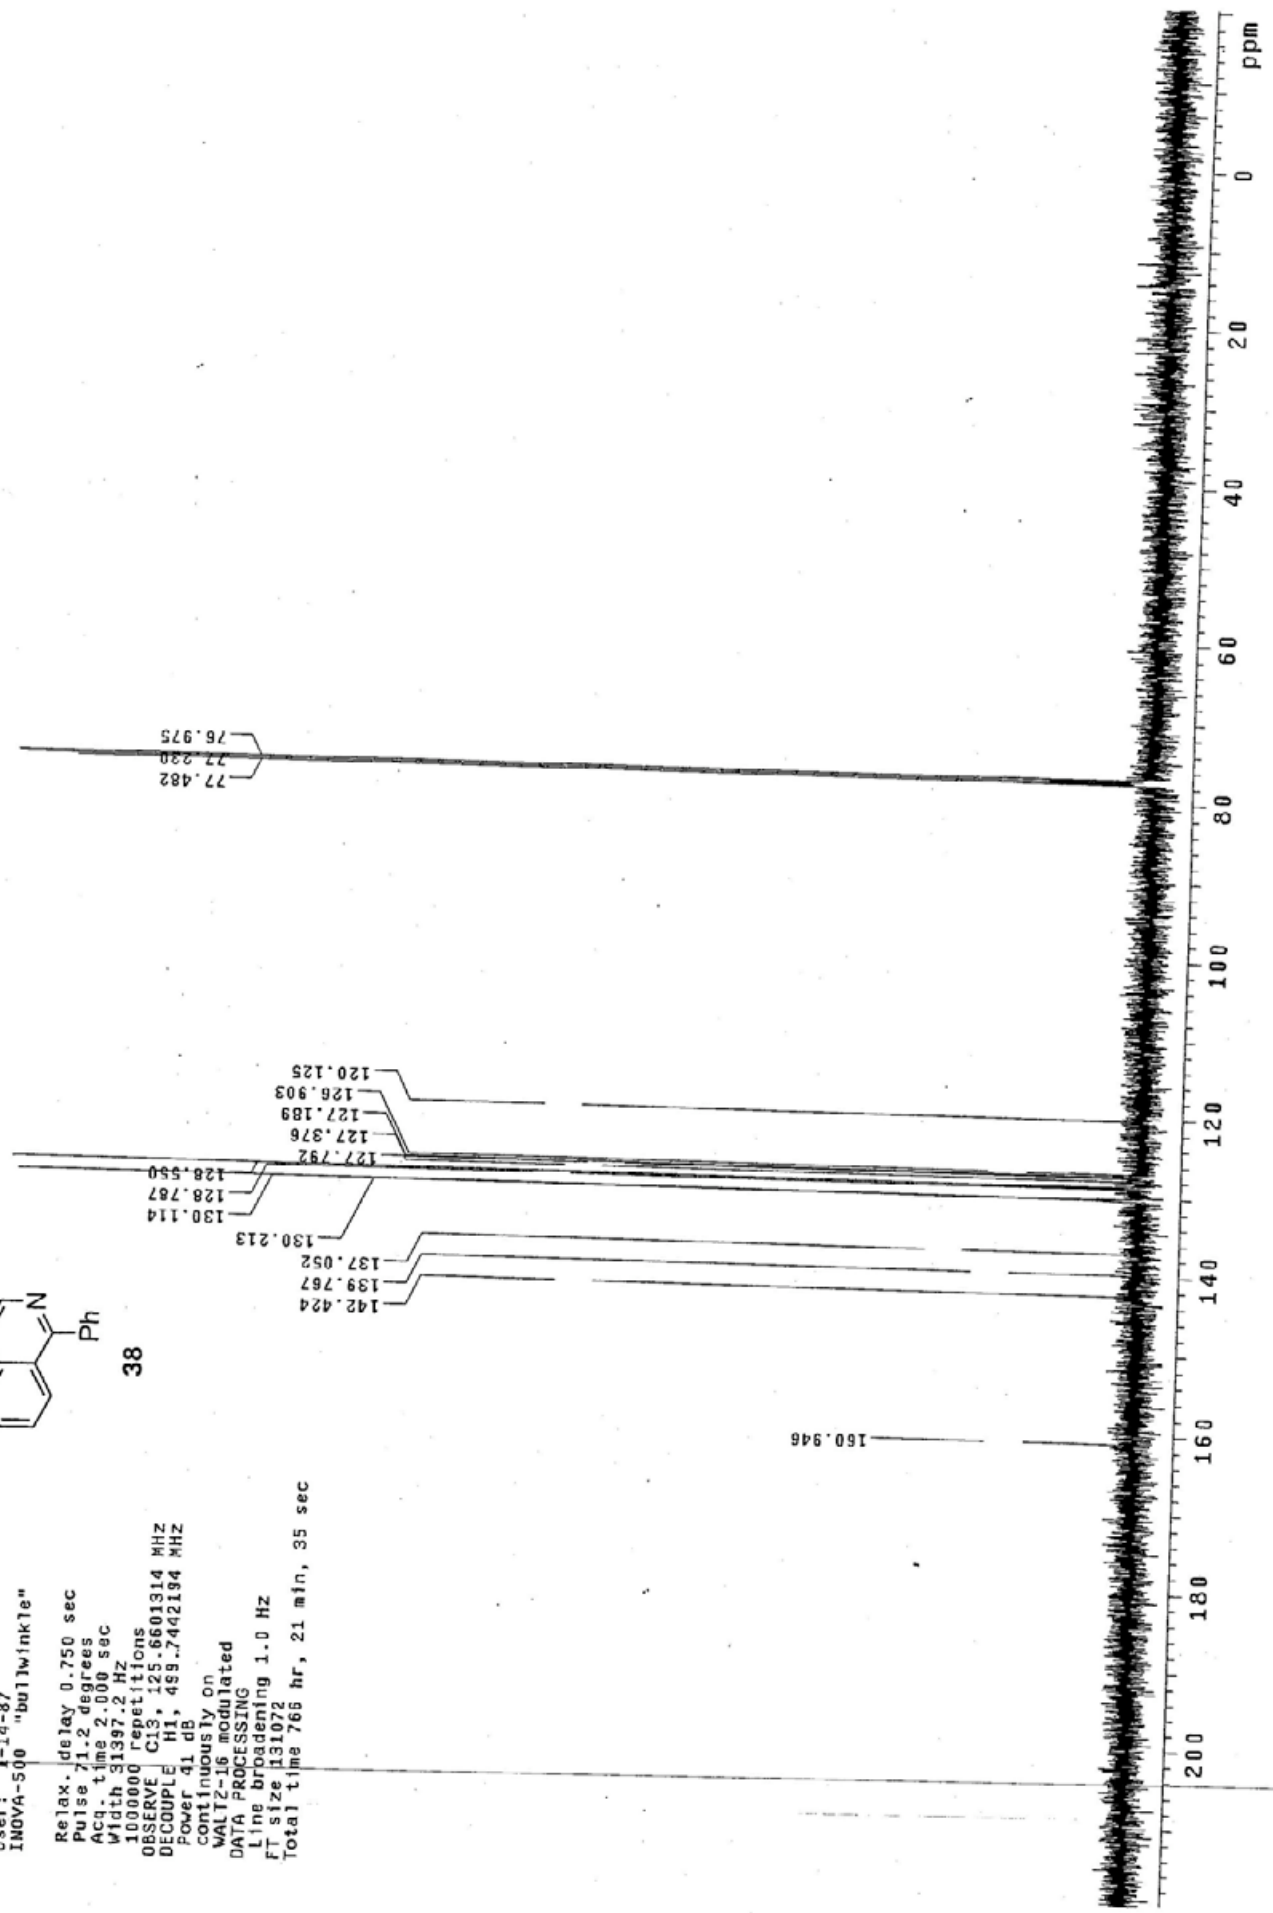

Supplement: NIHMS108650-supplement-1_si_001.pdf [file NIHMS108650-supplement-1_si_001.pdf]
